# Supplementary material for: The synergistic coordination of DNA 5-hydroxylmethylcytosine and RNA 5-methycytosine regulates human foetal development
Source: Research Square preprint supplement (doi:10.21203/rs.3.rs-478973/v1), 2021-05-25
Supplement: Supplementary file 1 [file 5d76a07070ad1ad1c00070a2.xlsx]

## Sheet: Supplementary Table 1
Supplementary Table 1. Summary of the Nano-hmC-Seal sample information.
The 5hmC signals of each sample were obtained by Nano-hmC-Seal.
Tissue	Stage (week)	Replicate	Sample	Total Reads	Uniq Mapped Reads
Heart	13-15	Rep1	Heart_13-15w_1	46408286	25044200
		Rep2	Heart_13-15w_2	38214091	30561481
		Rep3	Heart_13-15w_3	27784949	21316902
		Rep4	Heart_13-15w_4	36045223	31586987
	18-19	Rep1	Heart_18-19w_1	38698006	30562537
		Rep2	Heart_18-19w_2	20505567	15984652
		Rep3	Heart_18-19w_3	32417604	25418867
		Rep4	Heart_18-19w_4	30931468	23230187
	21-23	Rep1	Heart_21-23w_1	33160758	26213795
		Rep2	Heart_21-23w_2	29651777	25548146
		Rep3	Heart_21-23w_3	33390001	26008240
		Rep4	Heart_21-23w_4	35616526	27876375
	25-28	Rep1	Heart_25-28w_1	44474799	33375307
		Rep2	Heart_25-28w_2	40227013	29781951
		Rep3	Heart_25-28w_3	25243805	20430418
Kidney	13-15	Rep1	Kidney_13-15w_1	41394059	29310886
		Rep2	Kidney_13-15w_2	16758229	13078708
		Rep3	Kidney_13-15w_3	32417512	28064320
	18-19	Rep1	Kidney_18-19w_1	62070067	14926153
		Rep2	Kidney_18-19w_2	41229794	30902905
		Rep3	Kidney_18-19w_3	42925532	37691420
	21-23	Rep1	Kidney_21-23w_1	32371111	26125562
		Rep2	Kidney_21-23w_2	38352176	33140365
		Rep3	Kidney_21-23w_3	50820178	41361076
		Rep4	Kidney_21-23w_4	38251749	31601917
	25-28	Rep1	Kidney_25-28w_1	34460345	30167720
		Rep2	Kidney_25-28w_2	30546421	25781640
		Rep3	Kidney_25-28w_3	25002835	20061336
Liver	13-15	Rep1	Liver_13-15w_1	41424204	28072395
		Rep2	Liver_13-15w_2	20529271	16834036
		Rep3	Liver_13-15w_3	31029837	22901397
		Rep4	Liver_13-15w_4	34878993	28446104
	18-19	Rep1	Liver_18-19w_1	30242298	18178384
		Rep2	Liver_18-19w_2	64295138	50253629
		Rep3	Liver_18-19w_3	31659952	24434896
		Rep4	Liver_18-19w_4	34965405	30624931
	21-23	Rep1	Liver_21-23w_1	31050044	22115690
		Rep2	Liver_21-23w_2	45179795	30866702
	25-28	Rep1	Liver_25-28w_1	31900295	26243597
		Rep2	Liver_25-28w_2	43389573	37044889
		Rep3	Liver_25-28w_3	32927798	28379161
		Rep4	Liver_25-28w_4	38013275	30121270
Lung	13-15	Rep1	Lung_13-15w_1	45368292	32687317
		Rep2	Lung_13-15w_2	32794719	26595672
		Rep3	Lung_13-15w_3	28763302	24077351
		Rep4	Lung_13-15w_4	32734005	28245574
	18-19	Rep1	Lung_18-19w_1	31677648	24922461
		Rep2	Lung_18-19w_2	50179723	39840259
		Rep3	Lung_18-19w_3	38777911	30870692
		Rep4	Lung_18-19w_4	26693392	23080457
	21-23	Rep1	Lung_21-23w_1	33602775	24822376
		Rep2	Lung_21-23w_2	33688396	29886247
		Rep3	Lung_21-23w_3	47318413	38501018
		Rep4	Lung_21-23w_4	43011123	32999447
	25-28	Rep1	Lung_25-28w_1	34852008	30417694
		Rep2	Lung_25-28w_2	33126558	29149529
		Rep3	Lung_25-28w_3	37124409	31823360
		Rep4	Lung_25-28w_4	52776810	27886605

## Sheet: Supplementary Table 2
Supplementary Table 2. Organ-stage-specific DhMRs from Nano-hmC-Seal data.
Organ-stage-specific DhMRs were identified by ANOVA (Analysis of Variance). The P values were calculated using Benjamini-Hochberg method. The bins with fold change > 1.5 and P value < 0.05 were considered statistically significant. The significantly differential bins were merged respectively according to their positions on the chromosome and were considered as DhMRs.
Tissue-specific	Stage-specific (weeks)	Chr	Start	End
Heart	13-15	chr13	112755800	112755900
Heart	13-15	chr16	73368400	73368500
Heart	13-15	chr6	66348400	66348500
Heart	13-15	chr1	36353800	36354000
Heart	13-15	chr7	14898100	14898200
Heart	13-15	chr7	103613900	103614000
Heart	13-15	chr2	567200	567300
Heart	13-15	chr5	32865900	32866000
Heart	13-15	chr4	82958200	82958300
Heart	13-15	chr15	94982400	94982500
Heart	13-15	chr14	91863700	91863800
Heart	13-15	chr12	24592100	24592200
Heart	13-15	chr6	65184900	65185000
Heart	13-15	chr17	78644600	78644900
Heart	13-15	chr1	181089800	181089900
Heart	13-15	chr8	65084000	65084100
Heart	13-15	chr4	42317600	42317800
Heart	13-15	chr1	230388600	230388700
Heart	13-15	chr6	35691600	35691700
Heart	13-15	chr16	12083800	12083900
Heart	13-15	chr14	103977100	103977200
Heart	13-15	chr2	50065500	50065600
Heart	13-15	chr8	117683700	117683800
Heart	13-15	chr17	18874400	18874500
Heart	13-15	chr2	235611400	235611700
Heart	13-15	chr9	76769200	76769300
Heart	13-15	chr14	60212500	60212600
Heart	13-15	chr1	38567500	38567700
Heart	13-15	chr1	229118400	229118500
Heart	13-15	chr5	141107800	141107900
Heart	13-15	chr4	37757600	37757800
Heart	13-15	chr17	20662800	20662900
Heart	13-15	chr2	182719100	182719200
Heart	13-15	chr13	112713000	112713100
Heart	13-15	chr7	154673400	154673500
Heart	13-15	chr2	10159800	10159900
Heart	13-15	chr14	50848200	50848300
Heart	13-15	chr17	35735800	35735900
Heart	13-15	chr11	101589100	101589200
Heart	13-15	chr14	94959000	94959100
Heart	13-15	chr5	170887300	170887600
Heart	13-15	chr13	100401500	100401600
Heart	13-15	chr2	173239000	173239100
Heart	13-15	chr7	44580100	44580200
Heart	13-15	chr5	158304900	158305000
Heart	13-15	chr18	76581900	76582000
Heart	13-15	chr11	110372100	110372200
Heart	13-15	chr17	72803100	72803200
Heart	13-15	chr10	14573800	14573900
Heart	13-15	chr12	68080000	68080100
Heart	13-15	chr15	73298700	73298800
Heart	13-15	chr1	244090900	244091000
Heart	13-15	chr8	6360800	6360900
Heart	13-15	chr7	22743600	22743700
Heart	13-15	chr4	114138700	114138800
Heart	13-15	chr1	16823400	16823500
Heart	13-15	chr2	214956000	214956100
Heart	13-15	chr10	99662900	99663000
Heart	13-15	chr3	104954200	104954300
Heart	13-15	chr16	46782100	46782200
Heart	13-15	chr1	4934300	4934400
Heart	13-15	chr12	92488600	92488700
Heart	13-15	chr11	122630200	122630300
Heart	13-15	chr5	165978000	165978300
Heart	13-15	chr11	71050700	71050800
Heart	13-15	chr3	159002500	159002600
Heart	13-15	chr3	117632800	117633100
Heart	13-15	chr5	2513800	2513900
Heart	13-15	chr2	60535700	60535800
Heart	13-15	chr3	14372800	14372900
Heart	13-15	chr10	99573500	99573600
Heart	13-15	chr8	109355400	109355500
Heart	13-15	chr5	51859800	51859900
Heart	13-15	chr18	55503700	55503800
Heart	13-15	chr17	64580700	64580800
Heart	13-15	chr3	18293700	18293800
Heart	13-15	chr22	24542400	24542500
Heart	13-15	chr5	175580800	175580900
Heart	13-15	chr10	108389500	108389600
Heart	13-15	chr8	105343900	105344000
Heart	13-15	chr22	49476000	49476100
Heart	13-15	chr2	217997800	217997900
Heart	13-15	chr12	62361300	62361400
Heart	13-15	chr14	34858600	34858700
Heart	13-15	chr2	127543100	127543200
Heart	13-15	chr18	70199800	70199900
Heart	13-15	chr6	107669800	107669900
Heart	13-15	chr9	86722500	86722600
Heart	13-15	chr1	2465800	2465900
Heart	13-15	chr7	4047700	4047800
Heart	13-15	chr6	168138400	168138500
Heart	13-15	chr10	133122100	133122200
Heart	13-15	chr2	182679000	182679100
Heart	13-15	chr5	161243300	161243400
Heart	13-15	chr5	19493700	19493800
Heart	13-15	chr10	127993200	127993300
Heart	13-15	chr17	27987400	27987500
Heart	13-15	chr13	107938700	107938800
Heart	13-15	chr15	79219000	79219100
Heart	13-15	chr2	19229400	19229600
Heart	13-15	chr2	171507500	171507700
Heart	13-15	chr16	49559000	49559100
Heart	13-15	chr6	169946400	169946500
Heart	13-15	chr11	81261200	81261300
Heart	13-15	chr2	65105900	65106000
Heart	13-15	chr19	41939600	41939700
Heart	13-15	chr2	240820100	240820200
Heart	13-15	chr9	17630400	17630500
Heart	13-15	chr2	37281700	37281800
Heart	13-15	chr2	214423600	214423700
Heart	13-15	chr8	75008200	75008300
Heart	13-15	chr15	98928900	98929000
Heart	13-15	chr10	14887600	14887700
Heart	13-15	chr4	68211600	68211700
Heart	13-15	chr20	49365100	49365200
Heart	13-15	chr18	40630600	40630700
Heart	13-15	chr11	81037600	81037700
Heart	13-15	chr15	94925900	94926100
Heart	13-15	chr15	61629900	61630000
Heart	13-15	chr15	41250500	41250700
Heart	13-15	chr22	24916200	24916400
Heart	13-15	chr2	100793100	100793200
Heart	13-15	chr9	80480600	80480800
Heart	13-15	chr4	63534600	63534700
Heart	13-15	chr21	16580200	16580300
Heart	13-15	chr12	107820200	107820300
Heart	13-15	chr13	84770400	84770700
Heart	13-15	chr18	55786900	55787000
Heart	13-15	chr14	95563100	95563200
Heart	13-15	chr18	55795400	55795500
Heart	13-15	chr1	65808200	65808300
Heart	13-15	chr3	82332800	82332900
Heart	13-15	chr17	21353100	21353200
Heart	13-15	chr9	103240600	103240700
Heart	13-15	chr2	174134100	174134200
Heart	13-15	chr15	94576600	94576700
Heart	13-15	chr6	110644900	110645100
Heart	13-15	chr8	20663100	20663200
Heart	13-15	chr5	22753200	22753300
Heart	13-15	chr14	95662700	95662800
Heart	13-15	chr18	70485000	70485100
Heart	13-15	chr2	133205300	133205400
Heart	13-15	chr20	53804300	53804400
Heart	13-15	chr20	54990600	54990800
Heart	13-15	chr16	65310400	65310500
Heart	13-15	chr17	39135400	39135500
Heart	13-15	chr3	47260300	47260400
Heart	13-15	chr1	213822900	213823100
Heart	13-15	chr15	42775500	42775600
Heart	13-15	chr6	65897700	65897800
Heart	13-15	chr8	108658400	108658600
Heart	13-15	chr20	59461700	59461800
Heart	13-15	chr5	167776500	167776800
Heart	13-15	chr5	29460500	29460600
Heart	13-15	chr16	52560200	52560300
Heart	13-15	chr1	15220300	15220400
Heart	13-15	chr4	69908300	69908400
Heart	13-15	chr20	53992800	53992900
Heart	13-15	chr1	96565400	96565500
Heart	13-15	chr7	127887000	127887100
Heart	13-15	chr6	73561200	73561300
Heart	13-15	chr9	126156600	126156700
Heart	13-15	chr5	1412900	1413000
Heart	13-15	chr6	143484400	143484600
Heart	13-15	chr16	27757500	27757600
Heart	13-15	chr6	10585700	10585800
Heart	13-15	chr20	42985600	42985700
Heart	13-15	chr18	56601300	56601400
Heart	13-15	chr2	75687000	75687100
Heart	13-15	chr7	158823400	158823500
Heart	13-15	chr10	61051700	61051800
Heart	13-15	chr18	23420000	23420100
Heart	13-15	chr4	159861600	159861700
Heart	13-15	chr10	80300400	80300500
Heart	13-15	chr6	168684000	168684100
Heart	13-15	chr10	127244600	127244700
Heart	13-15	chr9	90087200	90087300
Heart	13-15	chr10	126011400	126011500
Heart	13-15	chr6	156885900	156886000
Heart	13-15	chr1	154788000	154788100
Heart	13-15	chr17	49778400	49778500
Heart	13-15	chr4	64869900	64870000
Heart	13-15	chr10	4614400	4614500
Heart	13-15	chr1	7652000	7652100
Heart	13-15	chr6	11276600	11276700
Heart	13-15	chr10	121510100	121510200
Heart	13-15	chr14	70581700	70581800
Heart	13-15	chr2	73976100	73976200
Heart	13-15	chr7	128210800	128210900
Heart	13-15	chr10	92397800	92397900
Heart	13-15	chr11	11463700	11463800
Heart	13-15	chr21	38571300	38571400
Heart	13-15	chr7	3221400	3221600
Heart	13-15	chr8	4376100	4376200
Heart	13-15	chr15	61657400	61657500
Heart	13-15	chr11	70892600	70892800
Heart	13-15	chr15	93858300	93858400
Heart	13-15	chr10	73405800	73405900
Heart	13-15	chr9	79022900	79023000
Heart	13-15	chr14	52074600	52074700
Heart	13-15	chr12	106722100	106722200
Heart	13-15	chr9	23281500	23281600
Heart	13-15	chr6	1201100	1201200
Heart	13-15	chr18	74736900	74737000
Heart	13-15	chr18	56105800	56105900
Heart	13-15	chr6	91245700	91245800
Heart	13-15	chr12	116087600	116087700
Heart	13-15	chr7	53117800	53117900
Heart	13-15	chr11	122294800	122294900
Heart	13-15	chr9	87260400	87260500
Heart	13-15	chr21	43943400	43943600
Heart	13-15	chr1	203465700	203465800
Heart	13-15	chr8	53454300	53454400
Heart	13-15	chr15	70289600	70289800
Heart	13-15	chr10	25779600	25779700
Heart	13-15	chr7	101258500	101258600
Heart	13-15	chr11	110270900	110271100
Heart	13-15	chr12	117072400	117072500
Heart	13-15	chr18	34884200	34884300
Heart	13-15	chr3	372300	372400
Heart	13-15	chr1	2362300	2362400
Heart	13-15	chr21	44920300	44920400
Heart	13-15	chr8	126605200	126605300
Heart	13-15	chr14	97512900	97513000
Heart	13-15	chr2	99124500	99124600
Heart	13-15	chr10	34485000	34485100
Heart	13-15	chr9	128448800	128448900
Heart	13-15	chr1	49533200	49533400
Heart	13-15	chr17	46535900	46536000
Heart	13-15	chr11	111238100	111238200
Heart	13-15	chr7	115372200	115372300
Heart	13-15	chr9	87424900	87425000
Heart	13-15	chr5	65091500	65091600
Heart	13-15	chr4	21918100	21918200
Heart	13-15	chr2	52158300	52158400
Heart	13-15	chr5	11632800	11632900
Heart	13-15	chr20	17757900	17758000
Heart	13-15	chr4	141723300	141723400
Heart	13-15	chr5	173662900	173663000
Heart	13-15	chr6	96601000	96601100
Heart	13-15	chr5	138750200	138750300
Heart	13-15	chr10	59725500	59725600
Heart	13-15	chr14	23987000	23987100
Heart	13-15	chr18	64176500	64176600
Heart	13-15	chr3	24561500	24561600
Heart	13-15	chr14	101794000	101794100
Heart	13-15	chr8	89167000	89167100
Heart	13-15	chr4	33782900	33783000
Heart	13-15	chr1	24701500	24701600
Heart	13-15	chr10	118497900	118498000
Heart	13-15	chr1	87671300	87671400
Heart	13-15	chr2	237878500	237878600
Heart	13-15	chr11	70980100	70980200
Heart	13-15	chr3	13919900	13920000
Heart	13-15	chr1	242871200	242871300
Heart	13-15	chr10	133587600	133587700
Heart	13-15	chr15	46509600	46509700
Heart	13-15	chr5	164715100	164715200
Heart	13-15	chr8	144217000	144217100
Heart	13-15	chr3	59590600	59590700
Heart	13-15	chr4	182279300	182279400
Heart	13-15	chr14	105850900	105851000
Heart	13-15	chr18	76946900	76947000
Heart	13-15	chr12	67718800	67718900
Heart	13-15	chr10	4109900	4110000
Heart	13-15	chr7	18005800	18005900
Heart	13-15	chr8	115134700	115134800
Heart	13-15	chr2	51778100	51778200
Heart	13-15	chr7	100540700	100540800
Heart	13-15	chr22	30968000	30968100
Heart	13-15	chr13	92413600	92413700
Heart	13-15	chr21	44572900	44573000
Heart	13-15	chr8	142340500	142340600
Heart	13-15	chr12	59969600	59969700
Heart	13-15	chr2	53235200	53235300
Heart	13-15	chr2	152183400	152183500
Heart	13-15	chr15	37661500	37661600
Heart	13-15	chr20	34762000	34762100
Heart	13-15	chr14	41182200	41182300
Heart	13-15	chr5	178214900	178215000
Heart	13-15	chr6	51992800	51992900
Heart	13-15	chr17	19602800	19602900
Heart	13-15	chr4	189832700	189832900
Heart	13-15	chr4	30745300	30745400
Heart	13-15	chr2	147117200	147117300
Heart	13-15	chr6	29593700	29593800
Heart	13-15	chr11	66324000	66324100
Heart	13-15	chr2	109541300	109541400
Heart	13-15	chr11	56164600	56164700
Heart	13-15	chr1	86072700	86072800
Heart	13-15	chr5	75651500	75651600
Heart	13-15	chr15	47546100	47546200
Heart	13-15	chr4	148260300	148260400
Heart	13-15	chr5	55456300	55456400
Heart	13-15	chr1	22282500	22282600
Heart	13-15	chr15	26678600	26678900
Heart	13-15	chr7	69050000	69050200
Heart	13-15	chr8	25668700	25668800
Heart	13-15	chr17	59522100	59522200
Heart	13-15	chr2	163627000	163627100
Heart	13-15	chr7	130825700	130825800
Heart	13-15	chr17	14219900	14220000
Heart	13-15	chr4	187345900	187346000
Heart	13-15	chr2	6139900	6140000
Heart	13-15	chr2	37367000	37367100
Heart	13-15	chr16	81579000	81579200
Heart	13-15	chr15	48559600	48559700
Heart	13-15	chr8	137029400	137029600
Heart	13-15	chr2	85386400	85386500
Heart	13-15	chr5	102095200	102095300
Heart	13-15	chr2	139968500	139968600
Heart	13-15	chr1	1353200	1353300
Heart	13-15	chr11	26216700	26216800
Heart	13-15	chr6	42495900	42496100
Heart	13-15	chr4	59216100	59216200
Heart	13-15	chr7	28901100	28901200
Heart	13-15	chr9	27249400	27249600
Heart	13-15	chr11	47607600	47607700
Heart	13-15	chr4	183852500	183852600
Heart	13-15	chr4	175117800	175117900
Heart	13-15	chr15	64761900	64762000
Heart	13-15	chr13	100506900	100507000
Heart	13-15	chr1	182279300	182279400
Heart	13-15	chr7	121081000	121081100
Heart	13-15	chr12	43061400	43061500
Heart	13-15	chr5	167778900	167779000
Heart	13-15	chr17	36099600	36099700
Heart	13-15	chr16	49089200	49089300
Heart	13-15	chr13	112618000	112618100
Heart	13-15	chr7	13341600	13341700
Heart	13-15	chr14	93404600	93404700
Heart	13-15	chr9	129991000	129991100
Heart	13-15	chr10	50049300	50049400
Heart	13-15	chr6	14292800	14292900
Heart	13-15	chr8	135293500	135293600
Heart	13-15	chr13	110315300	110315400
Heart	13-15	chr3	186188700	186188800
Heart	13-15	chr19	5024600	5024700
Heart	13-15	chr1	225906400	225906500
Heart	13-15	chr2	121478800	121478900
Heart	13-15	chr20	55850400	55850500
Heart	13-15	chr8	53693100	53693200
Heart	13-15	chr6	98110300	98110400
Heart	13-15	chr2	71098100	71098200
Heart	13-15	chr16	77774000	77774100
Heart	13-15	chr7	113897800	113897900
Heart	13-15	chr8	5818800	5819200
Heart	13-15	chr1	230126400	230126500
Heart	13-15	chr14	102565000	102565100
Heart	13-15	chr20	57078200	57078300
Heart	13-15	chr12	21722500	21722600
Heart	13-15	chr2	156477400	156477500
Heart	13-15	chr14	79613500	79613600
Heart	13-15	chr15	65828800	65829000
Heart	13-15	chr13	32547800	32547900
Heart	13-15	chr7	33770000	33770100
Heart	13-15	chr5	50639100	50639200
Heart	13-15	chr13	94133900	94134000
Heart	13-15	chr4	139643100	139643200
Heart	13-15	chr7	27517100	27517200
Heart	13-15	chr9	124410400	124410500
Heart	13-15	chr16	812700	812800
Heart	13-15	chr22	50011900	50012000
Heart	13-15	chr22	29512100	29512200
Heart	13-15	chr11	75964800	75964900
Heart	13-15	chr10	21456200	21456300
Heart	13-15	chr19	6725000	6725100
Heart	13-15	chr2	179855100	179855200
Heart	13-15	chr1	22561800	22561900
Heart	13-15	chr4	124469500	124469700
Heart	13-15	chr16	505400	505500
Heart	13-15	chr10	13768700	13768800
Heart	13-15	chr1	22595900	22596000
Heart	13-15	chr19	29750900	29751000
Heart	13-15	chr16	87136700	87136800
Heart	13-15	chr3	85090700	85090800
Heart	13-15	chr16	83429900	83430100
Heart	13-15	chr2	240484500	240484600
Heart	13-15	chr8	95275700	95275800
Heart	13-15	chr4	3661100	3661200
Heart	13-15	chr13	110150600	110150700
Heart	13-15	chr18	31774100	31774200
Heart	13-15	chr7	73443500	73443600
Heart	13-15	chr10	8021800	8021900
Heart	13-15	chr1	237541900	237542000
Heart	13-15	chr4	177550800	177551000
Heart	13-15	chr7	65554800	65554900
Heart	13-15	chr2	236686900	236687100
Heart	13-15	chr2	5974100	5974200
Heart	13-15	chr15	84243600	84243700
Heart	13-15	chr11	30412100	30412200
Heart	13-15	chr22	47789100	47789200
Heart	13-15	chr15	45133500	45133600
Heart	13-15	chr1	229030100	229030200
Heart	13-15	chr5	1203100	1203200
Heart	13-15	chr5	99291900	99292000
Heart	13-15	chr22	20261600	20261700
Heart	13-15	chr6	153772100	153772200
Heart	13-15	chr17	12536900	12537000
Heart	13-15	chr16	56993900	56994000
Heart	13-15	chr4	178493400	178493500
Heart	13-15	chr20	5607500	5607600
Heart	13-15	chr10	91311500	91311600
Heart	13-15	chr3	116473600	116473700
Heart	13-15	chr3	131688900	131689000
Heart	13-15	chr5	58576100	58576200
Heart	13-15	chr5	177804600	177804800
Heart	13-15	chr18	42358000	42358100
Heart	13-15	chr3	193562900	193563000
Heart	13-15	chr2	215378300	215378400
Heart	13-15	chr12	81838600	81838700
Heart	13-15	chr2	75334600	75334700
Heart	13-15	chr1	7392900	7393000
Heart	13-15	chr7	17227500	17227600
Heart	13-15	chr5	43185000	43185100
Heart	13-15	chr12	132588100	132588200
Heart	13-15	chr8	5208000	5208100
Heart	13-15	chr2	191495500	191495600
Heart	13-15	chr1	189801300	189801400
Heart	13-15	chr10	36146500	36146600
Heart	13-15	chr7	2043300	2043400
Heart	13-15	chr1	83342100	83342300
Heart	13-15	chr22	38128300	38128400
Heart	13-15	chr17	55322600	55322700
Heart	13-15	chr18	71942900	71943000
Heart	13-15	chr11	134606200	134606400
Heart	13-15	chr13	39283900	39284000
Heart	13-15	chr14	72946800	72946900
Heart	13-15	chr3	29785700	29785800
Heart	13-15	chr17	30155500	30155600
Heart	13-15	chr1	117524300	117524400
Heart	13-15	chr3	143395500	143395600
Heart	13-15	chr15	29145200	29145400
Heart	13-15	chr1	229242500	229242600
Heart	13-15	chr9	89992000	89992100
Heart	13-15	chr22	27420800	27420900
Heart	13-15	chr8	40531200	40531300
Heart	13-15	chr2	129056700	129056800
Heart	13-15	chr5	178214700	178214800
Heart	13-15	chr5	17436700	17436800
Heart	13-15	chr15	88540900	88541000
Heart	13-15	chr2	59732400	59732500
Heart	13-15	chr4	110138700	110138800
Heart	13-15	chr11	99836800	99836900
Heart	13-15	chr6	65222300	65222400
Heart	13-15	chr8	104515500	104515600
Heart	13-15	chr8	31818100	31818200
Heart	13-15	chr7	156398100	156398200
Heart	13-15	chr22	47589000	47589300
Heart	13-15	chr6	75092400	75092500
Heart	13-15	chr8	3177000	3177100
Heart	13-15	chr6	40681200	40681300
Heart	13-15	chr1	57735100	57735400
Heart	13-15	chr1	14030800	14030900
Heart	13-15	chr11	1083000	1083100
Heart	13-15	chr20	35603000	35603100
Heart	13-15	chr10	7932000	7932100
Heart	13-15	chr11	70928600	70928800
Heart	13-15	chr6	111245700	111245800
Heart	13-15	chr9	84335100	84335200
Heart	13-15	chr18	77945200	77945300
Heart	13-15	chr2	234813700	234813800
Heart	13-15	chr14	52500300	52500400
Heart	13-15	chr7	1118300	1118400
Heart	13-15	chr20	56163400	56163500
Heart	13-15	chr12	54069300	54069400
Heart	13-15	chr9	14591600	14591700
Heart	13-15	chr12	34566400	34566500
Heart	13-15	chr21	36246400	36246500
Heart	13-15	chr2	6636200	6636300
Heart	13-15	chr13	107043900	107044000
Heart	13-15	chr9	27421200	27421300
Heart	13-15	chr9	88678500	88678600
Heart	13-15	chr2	5129100	5129200
Heart	13-15	chr3	135516900	135517000
Heart	13-15	chr12	47670300	47670400
Heart	13-15	chr2	170943200	170943300
Heart	13-15	chr21	42718600	42718700
Heart	13-15	chr15	60282100	60282300
Heart	13-15	chr20	59028600	59028700
Heart	13-15	chr8	39977300	39977400
Heart	13-15	chr12	128930100	128930200
Heart	13-15	chr2	78741300	78741400
Heart	13-15	chr1	73313900	73314000
Heart	13-15	chr1	216635600	216635700
Heart	13-15	chr1	111054300	111054400
Heart	13-15	chr5	140882200	140882300
Heart	13-15	chr18	47596500	47596600
Heart	13-15	chr1	153592200	153592300
Heart	13-15	chr14	84189800	84189900
Heart	13-15	chr10	48536900	48537000
Heart	13-15	chr14	85081400	85081500
Heart	13-15	chr5	151301900	151302000
Heart	13-15	chr8	127629500	127629600
Heart	13-15	chr6	118397700	118397800
Heart	13-15	chr16	11366900	11367000
Heart	13-15	chr11	111207000	111207200
Heart	13-15	chr17	36474700	36474800
Heart	13-15	chr2	102010600	102010700
Heart	13-15	chr4	126559700	126559800
Heart	13-15	chr16	7515800	7515900
Heart	13-15	chr13	52959200	52959300
Heart	13-15	chr1	20659700	20659800
Heart	13-15	chr2	23741600	23741700
Heart	13-15	chr5	111953300	111953400
Heart	13-15	chr1	20497700	20497800
Heart	13-15	chr8	53693300	53693400
Heart	13-15	chr6	156632000	156632100
Heart	13-15	chr8	136132600	136132700
Heart	13-15	chr7	105055200	105055300
Heart	13-15	chr10	33489400	33489500
Heart	13-15	chr3	73649000	73649100
Heart	13-15	chr10	103081600	103081700
Heart	13-15	chr21	37487100	37487200
Heart	13-15	chr16	4025200	4025300
Heart	13-15	chr17	43839200	43839300
Heart	13-15	chr6	112433100	112433200
Heart	13-15	chr16	28605400	28605500
Heart	13-15	chr11	19909200	19909300
Heart	13-15	chr14	45013800	45013900
Heart	13-15	chr14	95853500	95853700
Heart	13-15	chr20	13292800	13293000
Heart	13-15	chr5	2455100	2455200
Heart	13-15	chr6	157933400	157933500
Heart	13-15	chr7	157653200	157653300
Heart	13-15	chr1	154068900	154069100
Heart	13-15	chr15	33445300	33445500
Heart	13-15	chr1	10024900	10025000
Heart	13-15	chr15	98963800	98964000
Heart	13-15	chr2	54277500	54277600
Heart	13-15	chr16	54998800	54998900
Heart	13-15	chr10	105634400	105634500
Heart	13-15	chr2	4307200	4307300
Heart	13-15	chr9	30539800	30539900
Heart	13-15	chr6	162110500	162110600
Heart	13-15	chr10	48429800	48429900
Heart	13-15	chr8	118715400	118715500
Heart	13-15	chr7	65676400	65676500
Heart	13-15	chr2	230090600	230090700
Heart	13-15	chr8	62462300	62462400
Heart	13-15	chr14	92652100	92652300
Heart	13-15	chr20	24528600	24528700
Heart	13-15	chr10	11289400	11289500
Heart	13-15	chr8	57637600	57637700
Heart	13-15	chr11	129725700	129725800
Heart	13-15	chr6	121800700	121800800
Heart	13-15	chr21	22148500	22148600
Heart	13-15	chr15	28197700	28197800
Heart	13-15	chr2	242908200	242908300
Heart	13-15	chr14	76758200	76758300
Heart	13-15	chr1	74469000	74469100
Heart	13-15	chr5	119198700	119198800
Heart	13-15	chr9	99043700	99043800
Heart	13-15	chr20	10523000	10523100
Heart	13-15	chr10	102632800	102632900
Heart	13-15	chr8	102728400	102728500
Heart	13-15	chr11	87132100	87132200
Heart	13-15	chr7	3036600	3036700
Heart	13-15	chr7	105613200	105613300
Heart	13-15	chr11	129077800	129077900
Heart	13-15	chr4	187633900	187634200
Heart	13-15	chr17	65974800	65974900
Heart	13-15	chr6	11620300	11620400
Heart	13-15	chr9	128816500	128816600
Heart	13-15	chr3	156644600	156644700
Heart	13-15	chr20	41004100	41004200
Heart	13-15	chr2	128687300	128687400
Heart	13-15	chr4	170865100	170865200
Heart	13-15	chr11	70495000	70495100
Heart	13-15	chr2	52251700	52251800
Heart	13-15	chr7	155794800	155794900
Heart	13-15	chr16	6302400	6302500
Heart	13-15	chr2	97599300	97599400
Heart	13-15	chr4	54216000	54216100
Heart	13-15	chr19	10063900	10064000
Heart	13-15	chr1	155539700	155539900
Heart	13-15	chr9	127899500	127899600
Heart	13-15	chr14	40507900	40508000
Heart	13-15	chr18	74646700	74646800
Heart	13-15	chr21	34014200	34014300
Heart	13-15	chr2	26514800	26514900
Heart	13-15	chr4	183450900	183451000
Heart	13-15	chr10	37099500	37099600
Heart	13-15	chr16	23426700	23426800
Heart	13-15	chr18	44804600	44804700
Heart	13-15	chr5	27462600	27462800
Heart	13-15	chr2	148080000	148080100
Heart	13-15	chr4	98099400	98099500
Heart	13-15	chr5	146097900	146098100
Heart	13-15	chr15	93040100	93040200
Heart	13-15	chr1	201943900	201944000
Heart	13-15	chr22	39186700	39186800
Heart	13-15	chr21	16652200	16652300
Heart	13-15	chr5	36684400	36684500
Heart	13-15	chr8	95767200	95767300
Heart	13-15	chr21	33360500	33360600
Heart	13-15	chr7	101012700	101012800
Heart	13-15	chr10	8492000	8492100
Heart	13-15	chr8	129463100	129463200
Heart	13-15	chr10	107681300	107681400
Heart	13-15	chr5	11272400	11272500
Heart	13-15	chr2	116745400	116745500
Heart	13-15	chr15	101397700	101397800
Heart	13-15	chr15	67441500	67441600
Heart	13-15	chr13	25212100	25212200
Heart	13-15	chr11	117243200	117243300
Heart	13-15	chr7	31158000	31158100
Heart	13-15	chr5	17182400	17182500
Heart	13-15	chr7	13102500	13102700
Heart	13-15	chr16	24840900	24841000
Heart	13-15	chr22	48203800	48203900
Heart	13-15	chr9	39183300	39183400
Heart	13-15	chr2	78377400	78377500
Heart	13-15	chr12	86823500	86823600
Heart	13-15	chr12	99744900	99745000
Heart	13-15	chr15	96909100	96909200
Heart	13-15	chr16	77353700	77353800
Heart	13-15	chr5	32989900	32990000
Heart	13-15	chr5	45354100	45354300
Heart	13-15	chr15	42160300	42160400
Heart	13-15	chr6	1056400	1056500
Heart	13-15	chr8	75148600	75148700
Heart	13-15	chr2	173578400	173578500
Heart	13-15	chr13	56862800	56862900
Heart	13-15	chr17	32701500	32701600
Heart	13-15	chr15	61309500	61309600
Heart	13-15	chr22	20182800	20183000
Heart	13-15	chr15	27194400	27194500
Heart	13-15	chr1	27316600	27316700
Heart	13-15	chr9	140937700	140937800
Heart	13-15	chr18	42556400	42556500
Heart	13-15	chr7	85841500	85841600
Heart	13-15	chr17	51660700	51660800
Heart	13-15	chr4	19927900	19928000
Heart	13-15	chr7	44307700	44307800
Heart	13-15	chr7	93440800	93440900
Heart	13-15	chr18	68173900	68174000
Heart	13-15	chr16	26852500	26852600
Heart	13-15	chr8	59224500	59224600
Heart	13-15	chr11	134626700	134626800
Heart	13-15	chr1	179068500	179068600
Heart	13-15	chr8	48252600	48252700
Heart	13-15	chr8	71520500	71520600
Heart	13-15	chr19	14173400	14173600
Heart	13-15	chr7	13801800	13801900
Heart	13-15	chr4	178242400	178242600
Heart	13-15	chr15	29424100	29424200
Heart	13-15	chr2	37593800	37593900
Heart	13-15	chr12	132157100	132157200
Heart	13-15	chr20	49482800	49482900
Heart	13-15	chr1	5428300	5428400
Heart	13-15	chr20	54922700	54922800
Heart	13-15	chr18	57261600	57261800
Heart	13-15	chr15	86843900	86844000
Heart	13-15	chr22	47449200	47449300
Heart	13-15	chr6	158388600	158388700
Heart	13-15	chr21	16766700	16766800
Heart	13-15	chr2	191239800	191239900
Heart	13-15	chr2	15177500	15177600
Heart	13-15	chr5	155119400	155119500
Heart	13-15	chr13	45478100	45478200
Heart	13-15	chr2	23691500	23691600
Heart	13-15	chr1	228081100	228081200
Heart	13-15	chr7	1340900	1341000
Heart	13-15	chr9	122763800	122763900
Heart	13-15	chr4	113613600	113613700
Heart	13-15	chr12	45074600	45074700
Heart	13-15	chr11	7721200	7721300
Heart	13-15	chr5	12310900	12311000
Heart	13-15	chr4	45232000	45232100
Heart	13-15	chr15	102092200	102092300
Heart	13-15	chr6	36299100	36299200
Heart	13-15	chr2	30885500	30885600
Heart	13-15	chr7	67158700	67158800
Heart	13-15	chr5	3391700	3391800
Heart	13-15	chr5	49650900	49651000
Heart	13-15	chr8	125968700	125968900
Heart	13-15	chr3	184026200	184026300
Heart	13-15	chr2	177315500	177315600
Heart	13-15	chr2	38426700	38426800
Heart	13-15	chr18	20681700	20681800
Heart	13-15	chr16	49027600	49027700
Heart	13-15	chr5	133074900	133075000
Heart	13-15	chr18	27159200	27159300
Heart	13-15	chr2	231820000	231820100
Heart	13-15	chr12	9152600	9152700
Heart	13-15	chr3	20144300	20144400
Heart	13-15	chr6	13979100	13979200
Heart	13-15	chr6	165273800	165273900
Heart	13-15	chr13	66382000	66382100
Heart	13-15	chr1	146525700	146525800
Heart	13-15	chr7	71543100	71543200
Heart	13-15	chr21	44765800	44765900
Heart	13-15	chr1	189834400	189834500
Heart	13-15	chr5	166722600	166722700
Heart	13-15	chr11	69704200	69704300
Heart	13-15	chr14	91830200	91830300
Heart	13-15	chr11	75259100	75259200
Heart	13-15	chr2	12243700	12243800
Heart	13-15	chr22	38351900	38352000
Heart	13-15	chr1	178936500	178936600
Heart	13-15	chr11	75667200	75667300
Heart	13-15	chr17	8180000	8180100
Heart	13-15	chr9	79757000	79757100
Heart	13-15	chr21	29766300	29766400
Heart	13-15	chr9	139023700	139023800
Heart	13-15	chr11	45537100	45537200
Heart	13-15	chr18	50504000	50504100
Heart	13-15	chr12	67789900	67790000
Heart	13-15	chr1	224968700	224968800
Heart	13-15	chr13	49948100	49948200
Heart	13-15	chr4	184334800	184334900
Heart	13-15	chr6	168446900	168447000
Heart	13-15	chr7	140385500	140385600
Heart	13-15	chr16	6490500	6490600
Heart	13-15	chr21	25109000	25109100
Heart	13-15	chr2	26411300	26411400
Heart	13-15	chr17	51553000	51553100
Heart	13-15	chr6	34076900	34077000
Heart	13-15	chr16	52107100	52107200
Heart	13-15	chr10	116133700	116133800
Heart	13-15	chr13	99054500	99054600
Heart	13-15	chr13	66350500	66350600
Heart	13-15	chr3	102190100	102190300
Heart	13-15	chr9	36148500	36148600
Heart	13-15	chr11	36085500	36085600
Heart	13-15	chr10	12581400	12581500
Heart	13-15	chr8	20878000	20878100
Heart	13-15	chr19	56019500	56019600
Heart	13-15	chr7	137279100	137279200
Heart	13-15	chr15	36421400	36421500
Heart	13-15	chr5	17090100	17090200
Heart	13-15	chr1	48360200	48360300
Heart	13-15	chr11	110411300	110411400
Heart	13-15	chr5	163547600	163547700
Heart	13-15	chr9	89251700	89251800
Heart	13-15	chr19	38784000	38784100
Heart	13-15	chr16	68790400	68790600
Heart	13-15	chr7	82952100	82952200
Heart	13-15	chr18	5411600	5411700
Heart	13-15	chr3	63759900	63760000
Heart	13-15	chr16	6022300	6022400
Heart	13-15	chr12	95844400	95844500
Heart	13-15	chr3	62774200	62774300
Heart	13-15	chr11	1427600	1427700
Heart	13-15	chr11	9378800	9378900
Heart	13-15	chr19	46984200	46984300
Heart	13-15	chr10	111724200	111724300
Heart	13-15	chr8	21487700	21487800
Heart	13-15	chr10	102851400	102851500
Heart	13-15	chr17	10643000	10643100
Heart	13-15	chr3	67283900	67284000
Heart	13-15	chr19	45382000	45382100
Heart	13-15	chr18	11991400	11991600
Heart	13-15	chr20	13708400	13708500
Heart	13-15	chr3	110027000	110027100
Heart	13-15	chr16	17598800	17598900
Heart	13-15	chr17	55775000	55775100
Heart	13-15	chr17	3362700	3362800
Heart	13-15	chr9	138352900	138353000
Heart	13-15	chr8	24571700	24571900
Heart	13-15	chr16	85391800	85391900
Heart	13-15	chr6	121839800	121839900
Heart	13-15	chr7	94364000	94364100
Heart	13-15	chr2	64254200	64254300
Heart	13-15	chr16	84044700	84044800
Heart	13-15	chr13	84371100	84371200
Heart	13-15	chr16	72262400	72262500
Heart	13-15	chr10	25892100	25892200
Heart	13-15	chr7	136229900	136230000
Heart	13-15	chr4	44799900	44800000
Heart	13-15	chr3	163562800	163562900
Heart	13-15	chr21	46625400	46625600
Heart	13-15	chr6	25352900	25353000
Heart	13-15	chr12	33206100	33206200
Heart	13-15	chr14	33257400	33257500
Heart	13-15	chr17	14641800	14641900
Heart	13-15	chr16	47201300	47201400
Heart	13-15	chr6	155283100	155283200
Heart	13-15	chr5	176291800	176291900
Heart	13-15	chr6	48194500	48194600
Heart	13-15	chr4	180937000	180937100
Heart	13-15	chr1	207808500	207808600
Heart	13-15	chr20	46772000	46772100
Heart	13-15	chr2	150486300	150486400
Heart	13-15	chr10	103156800	103156900
Heart	13-15	chr2	17329900	17330000
Heart	13-15	chr11	126635400	126635500
Heart	13-15	chr11	27613800	27613900
Heart	13-15	chr18	31222500	31222600
Heart	13-15	chr12	101085100	101085300
Heart	13-15	chr11	47788700	47788800
Heart	13-15	chr3	86015100	86015200
Heart	13-15	chr22	27156200	27156300
Heart	13-15	chr9	141068200	141068300
Heart	13-15	chr3	8896600	8896700
Heart	13-15	chr7	157455100	157455200
Heart	13-15	chr8	8634200	8634300
Heart	13-15	chr7	133862400	133862500
Heart	13-15	chr21	38095500	38095600
Heart	13-15	chr19	47960700	47960800
Heart	13-15	chr4	38430400	38430500
Heart	13-15	chr5	167667200	167667400
Heart	13-15	chr14	78709300	78709600
Heart	13-15	chr13	96415900	96416000
Heart	13-15	chr12	81960200	81960300
Heart	13-15	chr16	60217400	60217500
Heart	13-15	chr6	158407500	158407700
Heart	13-15	chr1	24195700	24195800
Heart	13-15	chr7	154577100	154577200
Heart	13-15	chr6	103996900	103997000
Heart	13-15	chr19	55384800	55385000
Heart	13-15	chr4	187961200	187961300
Heart	13-15	chr2	126313100	126313200
Heart	13-15	chr14	95707400	95707500
Heart	13-15	chr4	31266800	31266900
Heart	13-15	chr5	156190400	156190500
Heart	13-15	chr3	197234700	197234800
Heart	13-15	chr7	138914400	138914500
Heart	13-15	chr6	53460300	53460400
Heart	13-15	chr5	106989300	106989400
Heart	13-15	chr12	351400	351500
Heart	13-15	chr7	1132800	1132900
Heart	13-15	chr3	192332400	192332600
Heart	13-15	chr11	70859600	70859900
Heart	13-15	chr19	33775400	33775500
Heart	13-15	chr3	43562500	43562600
Heart	13-15	chr7	153371600	153371700
Heart	13-15	chr9	75564200	75564300
Heart	13-15	chr12	111142700	111142800
Heart	13-15	chr11	78808100	78808200
Heart	13-15	chr1	57228600	57228700
Heart	13-15	chr5	1964200	1964400
Heart	13-15	chr14	96928000	96928100
Heart	13-15	chr22	31025300	31025500
Heart	13-15	chr5	5327400	5327500
Heart	13-15	chr7	4349300	4349400
Heart	13-15	chr13	39226800	39226900
Heart	13-15	chr10	9381600	9381700
Heart	13-15	chr4	83363900	83364000
Heart	13-15	chr2	107810900	107811000
Heart	13-15	chr10	129223200	129223300
Heart	13-15	chr5	92258200	92258300
Heart	13-15	chr6	110666100	110666200
Heart	13-15	chr7	151535500	151535600
Heart	13-15	chr20	57330900	57331000
Heart	13-15	chr11	25651100	25651200
Heart	13-15	chr20	43880200	43880300
Heart	13-15	chr10	101135600	101135700
Heart	13-15	chr11	124668500	124668600
Heart	13-15	chr17	59529400	59529600
Heart	13-15	chr20	59797400	59797500
Heart	13-15	chr21	43581100	43581200
Heart	13-15	chr7	93020100	93020200
Heart	13-15	chr5	17151900	17152000
Heart	13-15	chr18	10859600	10859800
Heart	13-15	chr18	13534000	13534100
Heart	13-15	chr2	108186400	108186500
Heart	13-15	chr7	68319000	68319100
Heart	13-15	chr5	158072100	158072200
Heart	13-15	chr9	115185600	115185700
Heart	13-15	chr7	18247400	18247600
Heart	13-15	chr10	77163900	77164100
Heart	13-15	chr11	124388700	124388900
Heart	13-15	chr16	60195200	60195300
Heart	13-15	chr3	190839600	190839700
Heart	13-15	chr1	3518200	3518300
Heart	13-15	chr16	31377200	31377300
Heart	13-15	chr15	45954500	45954600
Heart	13-15	chr18	74736700	74736800
Heart	13-15	chr5	35174200	35174300
Heart	13-15	chr14	104754500	104754600
Heart	13-15	chr6	71903200	71903300
Heart	13-15	chr3	16905500	16905600
Heart	13-15	chr1	15141200	15141400
Heart	13-15	chr8	76939600	76939700
Heart	13-15	chr22	19492800	19492900
Heart	13-15	chr2	100457400	100457600
Heart	13-15	chr20	34647100	34647200
Heart	13-15	chr5	157724200	157724300
Heart	13-15	chr4	118540100	118540200
Heart	13-15	chr5	75651700	75651800
Heart	13-15	chr20	19384400	19384500
Heart	13-15	chr22	29216500	29216600
Heart	13-15	chr11	1390300	1390400
Heart	13-15	chr3	61345600	61345700
Heart	13-15	chr16	47276600	47276700
Heart	13-15	chr5	2727800	2728000
Heart	13-15	chr7	142581800	142581900
Heart	13-15	chr6	98025400	98025500
Heart	13-15	chr1	30833800	30833900
Heart	13-15	chr16	57529800	57529900
Heart	13-15	chr20	46061800	46061900
Heart	13-15	chr2	141267400	141267500
Heart	13-15	chr7	139995400	139995500
Heart	13-15	chr3	102014800	102014900
Heart	13-15	chr3	55347600	55347700
Heart	13-15	chr9	30455300	30455500
Heart	13-15	chr2	173284100	173284200
Heart	13-15	chr12	42960600	42960700
Heart	13-15	chr2	239542700	239542800
Heart	13-15	chr1	70249400	70249500
Heart	13-15	chr1	99568900	99569000
Heart	13-15	chr7	70386900	70387000
Heart	13-15	chr1	156662500	156662800
Heart	13-15	chr15	29246300	29246400
Heart	13-15	chr2	104939500	104939600
Heart	13-15	chr14	51113300	51113400
Heart	13-15	chr1	64986700	64986900
Heart	13-15	chr4	162924100	162924200
Heart	13-15	chr2	12016400	12016600
Heart	13-15	chr7	73712100	73712200
Heart	13-15	chr2	95969800	95969900
Heart	13-15	chr5	157189700	157189800
Heart	13-15	chr13	95501200	95501400
Heart	13-15	chr4	182294800	182294900
Heart	13-15	chr2	241941400	241941500
Heart	13-15	chr4	155440400	155440500
Heart	13-15	chr4	46999300	46999800
Heart	13-15	chr13	46765000	46765100
Heart	13-15	chr4	7663100	7663200
Heart	13-15	chr3	147051900	147052000
Heart	13-15	chr3	74552000	74552100
Heart	13-15	chr7	55048200	55048300
Heart	13-15	chr5	36034400	36034500
Heart	13-15	chr8	49746700	49746800
Heart	13-15	chr9	97254700	97254800
Heart	13-15	chr2	240437200	240437300
Heart	13-15	chr4	144369200	144369300
Heart	13-15	chr3	32405800	32405900
Heart	13-15	chr6	112792000	112792100
Heart	13-15	chr2	51285800	51285900
Heart	13-15	chr20	57971300	57971400
Heart	13-15	chr14	101987400	101987500
Heart	13-15	chr1	13815900	13816000
Heart	13-15	chr6	154629300	154629400
Heart	13-15	chr9	19743000	19743100
Heart	13-15	chr13	66968000	66968200
Heart	13-15	chr2	238406000	238406100
Heart	13-15	chr1	19058000	19058100
Heart	13-15	chr6	148574300	148574400
Heart	13-15	chr1	151630100	151630200
Heart	13-15	chr6	222700	222800
Heart	13-15	chr21	37619000	37619100
Heart	13-15	chr15	88502600	88502700
Heart	13-15	chr1	67077500	67077600
Heart	13-15	chr3	19376200	19376300
Heart	13-15	chr11	119146800	119146900
Heart	13-15	chr16	84829500	84829600
Heart	13-15	chr20	25181700	25182100
Heart	13-15	chr8	88029200	88029300
Heart	13-15	chr10	116030100	116030200
Heart	13-15	chr9	87886100	87886300
Heart	13-15	chr2	25167000	25167200
Heart	13-15	chr6	45445600	45445700
Heart	13-15	chr8	66864000	66864100
Heart	13-15	chr2	141476500	141476600
Heart	13-15	chr2	189017600	189017700
Heart	13-15	chr3	3065000	3065100
Heart	13-15	chr8	68981100	68981200
Heart	13-15	chr16	19391600	19391700
Heart	13-15	chr6	65470500	65470600
Heart	13-15	chr11	115127200	115127300
Heart	13-15	chr1	16823200	16823300
Heart	13-15	chr7	97992700	97992800
Heart	13-15	chr11	70954500	70954700
Heart	13-15	chr7	157653700	157653800
Heart	13-15	chr1	198796600	198796700
Heart	13-15	chr13	81960100	81960200
Heart	13-15	chr8	49201900	49202100
Heart	13-15	chr15	101692800	101692900
Heart	13-15	chr2	107501800	107501900
Heart	13-15	chr8	94846700	94846800
Heart	13-15	chr2	205471300	205471400
Heart	13-15	chr9	132143700	132143800
Heart	13-15	chr22	50084700	50084800
Heart	13-15	chr8	68295100	68295200
Heart	13-15	chr3	74861900	74862000
Heart	13-15	chr3	2135100	2135200
Heart	13-15	chr7	144881400	144881500
Heart	13-15	chr4	33431400	33431500
Heart	13-15	chr7	53162800	53162900
Heart	13-15	chr20	56155700	56155800
Heart	13-15	chr19	30623500	30623600
Heart	13-15	chr10	17213600	17213700
Heart	13-15	chr3	105944000	105944100
Heart	13-15	chr3	11744600	11744700
Heart	13-15	chr4	40379700	40379800
Heart	13-15	chr11	87050500	87050600
Heart	13-15	chr18	59674500	59674600
Heart	13-15	chr8	136431000	136431100
Heart	13-15	chr9	92855300	92855400
Heart	13-15	chr8	112138500	112138600
Heart	13-15	chr7	8260800	8260900
Heart	13-15	chr10	21456400	21456500
Heart	13-15	chr4	25996400	25996600
Heart	13-15	chr14	96686200	96686300
Heart	13-15	chr5	7622400	7622500
Heart	13-15	chr18	24283400	24283500
Heart	13-15	chr1	117808400	117808500
Heart	13-15	chr11	134770000	134770200
Heart	13-15	chr10	86007300	86007400
Heart	13-15	chr19	3716400	3716500
Heart	13-15	chr10	104195000	104195100
Heart	13-15	chr17	39773800	39773900
Heart	13-15	chr2	173100700	173100800
Heart	13-15	chr12	6479600	6480100
Heart	13-15	chr4	34937500	34937600
Heart	13-15	chr8	54049200	54049300
Heart	13-15	chr4	25806800	25806900
Heart	13-15	chr1	15064800	15065000
Heart	13-15	chr8	119469400	119469600
Heart	13-15	chr15	55052000	55052100
Heart	13-15	chr20	50743400	50743500
Heart	13-15	chr17	59467400	59467500
Heart	13-15	chr4	66791700	66791800
Heart	13-15	chr16	49211500	49211600
Heart	13-15	chr6	3302000	3302100
Heart	13-15	chr8	68744100	68744200
Heart	13-15	chr10	123655100	123655200
Heart	13-15	chr12	119886300	119886400
Heart	13-15	chr1	181078100	181078200
Heart	13-15	chr16	57902300	57902400
Heart	13-15	chr18	60110400	60110500
Heart	13-15	chr16	61852500	61852600
Heart	13-15	chr1	104712700	104712800
Heart	13-15	chr4	38766700	38766800
Heart	13-15	chr13	90830100	90830200
Heart	13-15	chr1	116257500	116257600
Heart	13-15	chr16	79105900	79106000
Heart	13-15	chr1	168607700	168607800
Heart	13-15	chr1	157928800	157928900
Heart	13-15	chr2	8766000	8766100
Heart	13-15	chr16	57422200	57422300
Heart	13-15	chr1	221196700	221196800
Heart	13-15	chr11	119515100	119515200
Heart	13-15	chr17	73777300	73777400
Heart	13-15	chr9	16843400	16843500
Heart	13-15	chr4	180981200	180981300
Heart	13-15	chr4	148153100	148153200
Heart	13-15	chr7	116622300	116622400
Heart	13-15	chr6	3044200	3044300
Heart	13-15	chr2	109867700	109867900
Heart	13-15	chr2	241899100	241899300
Heart	13-15	chr11	119529700	119529800
Heart	13-15	chr4	66182800	66182900
Heart	13-15	chr12	97713500	97713600
Heart	13-15	chr8	10263100	10263200
Heart	13-15	chr3	12565700	12565800
Heart	13-15	chr11	37753900	37754000
Heart	13-15	chr14	97480300	97480400
Heart	13-15	chr11	56349500	56349600
Heart	13-15	chr3	129994800	129994900
Heart	13-15	chr18	35354100	35354200
Heart	13-15	chr6	73815600	73815700
Heart	13-15	chr6	43263900	43264000
Heart	13-15	chr6	48536300	48536400
Heart	13-15	chr4	38683100	38683200
Heart	13-15	chr6	1500400	1500500
Heart	13-15	chr11	8442500	8442600
Heart	13-15	chr12	105713900	105714000
Heart	13-15	chr16	82296400	82296500
Heart	13-15	chr1	40164300	40164400
Heart	13-15	chr6	55730100	55730200
Heart	13-15	chr1	244368000	244368200
Heart	13-15	chr2	82317800	82317900
Heart	13-15	chr14	94222200	94222300
Heart	13-15	chr17	40938100	40938200
Heart	13-15	chr3	85699300	85699500
Heart	13-15	chr3	126935800	126936000
Heart	13-15	chr3	15835400	15835500
Heart	13-15	chr12	68918300	68918400
Heart	13-15	chr5	78019300	78019400
Heart	13-15	chr6	39177000	39177100
Heart	13-15	chr12	116718600	116718700
Heart	13-15	chr5	164566900	164567200
Heart	13-15	chr13	85849100	85849200
Heart	13-15	chr8	75736200	75736400
Heart	13-15	chr15	78232200	78232300
Heart	13-15	chr7	43992900	43993000
Heart	13-15	chr4	45680600	45680700
Heart	13-15	chr20	56333000	56333100
Heart	13-15	chr3	66665600	66665700
Heart	13-15	chr1	165627500	165627600
Heart	13-15	chr13	69929000	69929100
Heart	13-15	chr8	1616500	1616600
Heart	13-15	chr10	89830100	89830200
Heart	13-15	chr1	31234900	31235000
Heart	13-15	chr4	135380800	135380900
Heart	13-15	chr15	94164000	94164100
Heart	13-15	chr6	162225200	162225300
Heart	13-15	chr2	184986100	184986200
Heart	13-15	chr4	153371600	153371700
Heart	13-15	chr9	89995600	89995700
Heart	13-15	chr1	188209400	188209500
Heart	13-15	chr6	114272100	114272200
Heart	13-15	chr11	122535400	122535500
Heart	13-15	chr18	74298300	74298400
Heart	13-15	chr2	214464600	214464700
Heart	13-15	chr17	5678400	5678500
Heart	13-15	chr9	125789900	125790000
Heart	13-15	chr3	83991300	83991700
Heart	13-15	chr12	24752500	24752700
Heart	13-15	chr2	34630400	34630500
Heart	13-15	chr11	131799900	131800000
Heart	13-15	chr7	71288800	71288900
Heart	13-15	chr3	84745300	84745400
Heart	13-15	chr2	109578400	109578500
Heart	13-15	chr1	245117800	245117900
Heart	13-15	chr14	101756200	101756300
Heart	13-15	chr1	15005600	15005700
Heart	13-15	chr10	2320600	2320700
Heart	13-15	chr6	15457200	15457300
Heart	13-15	chr4	149946100	149946200
Heart	13-15	chr16	11816600	11816700
Heart	13-15	chr11	107568800	107568900
Heart	13-15	chr8	26342400	26342500
Heart	13-15	chr1	92304500	92304600
Heart	13-15	chr15	67411600	67411800
Heart	13-15	chr6	73828700	73828900
Heart	13-15	chr13	22313500	22313600
Heart	13-15	chr6	167601000	167601100
Heart	13-15	chr6	9507800	9508000
Heart	13-15	chr15	94707900	94708000
Heart	13-15	chr18	42598500	42598600
Heart	13-15	chr11	3128200	3128300
Heart	13-15	chr18	41934900	41935000
Heart	13-15	chr13	24846200	24846300
Heart	13-15	chr16	608400	608500
Heart	13-15	chr5	85046700	85046800
Heart	13-15	chr12	5415400	5415500
Heart	13-15	chr7	123538300	123538400
Heart	13-15	chr4	113019700	113019800
Heart	13-15	chr7	137092300	137092400
Heart	13-15	chr2	210327000	210327100
Heart	13-15	chr1	151326700	151326800
Heart	13-15	chr5	129300000	129300100
Heart	13-15	chr8	144283700	144283800
Heart	13-15	chr19	20472500	20472600
Heart	13-15	chr4	30772400	30772500
Heart	13-15	chr18	76363000	76363100
Heart	13-15	chr18	6743300	6743500
Heart	13-15	chr16	81582500	81582600
Heart	13-15	chr11	123260200	123260300
Heart	13-15	chr3	28352300	28352400
Heart	13-15	chr2	56536000	56536100
Heart	13-15	chr21	43296100	43296200
Heart	13-15	chr6	117816000	117816100
Heart	13-15	chr10	117766900	117767000
Heart	13-15	chr3	17614600	17614700
Heart	13-15	chr20	61341500	61341600
Heart	13-15	chr10	108690600	108690700
Heart	13-15	chr22	46025800	46025900
Heart	13-15	chr20	20764300	20764400
Heart	13-15	chr17	11200	11300
Heart	13-15	chr5	2521500	2521600
Heart	13-15	chr4	183143400	183143500
Heart	13-15	chr4	62380500	62380600
Heart	13-15	chr2	173576300	173576400
Heart	13-15	chr5	139167400	139167500
Heart	13-15	chr4	134537700	134537800
Heart	13-15	chr5	91254100	91254200
Heart	13-15	chr3	94456100	94456200
Heart	13-15	chr5	28209100	28209200
Heart	13-15	chr22	48211900	48212000
Heart	13-15	chr8	108413100	108413200
Heart	13-15	chr7	27555700	27555900
Heart	13-15	chr13	29417400	29417600
Heart	13-15	chr10	109671000	109671100
Heart	13-15	chr18	66147600	66147700
Heart	13-15	chr2	50465300	50465400
Heart	13-15	chr8	8113200	8113300
Heart	13-15	chr5	133252800	133252900
Heart	13-15	chr9	3836400	3836500
Heart	13-15	chr9	75862900	75863000
Heart	13-15	chr6	163308500	163308600
Heart	13-15	chr10	47022100	47022200
Heart	13-15	chr1	48276700	48276800
Heart	13-15	chr7	18435000	18435100
Heart	13-15	chr1	49259300	49259400
Heart	13-15	chr5	150965600	150965700
Heart	13-15	chr19	959600	959700
Heart	13-15	chr15	35280000	35280100
Heart	13-15	chr4	68514900	68515000
Heart	13-15	chr7	155349200	155349300
Heart	13-15	chr15	70991500	70991600
Heart	13-15	chr8	135647700	135647800
Heart	13-15	chr1	4658900	4659000
Heart	13-15	chr15	93562600	93562700
Heart	13-15	chr9	102271200	102271300
Heart	13-15	chr3	142322100	142322200
Heart	13-15	chr11	75078100	75078200
Heart	13-15	chr19	17790800	17791000
Heart	13-15	chr2	240427700	240427800
Heart	13-15	chr2	45310100	45310200
Heart	13-15	chr6	17090000	17090100
Heart	13-15	chr3	13504100	13504200
Heart	13-15	chr17	14700900	14701000
Heart	13-15	chr1	203550500	203550600
Heart	13-15	chr7	148040300	148040400
Heart	13-15	chr6	44316900	44317000
Heart	13-15	chr10	134342000	134342100
Heart	13-15	chr9	128767100	128767200
Heart	13-15	chr2	183415100	183415200
Heart	13-15	chr2	137051900	137052000
Heart	13-15	chr3	24113600	24113700
Heart	13-15	chr5	123057000	123057100
Heart	13-15	chr3	146536500	146536600
Heart	13-15	chr22	35509600	35509700
Heart	13-15	chr21	22160000	22160100
Heart	13-15	chr5	114406100	114406200
Heart	13-15	chr10	118219800	118219900
Heart	13-15	chr6	88711100	88711200
Heart	13-15	chr22	26407800	26407900
Heart	13-15	chr1	64128600	64128700
Heart	13-15	chr2	168635800	168635900
Heart	13-15	chr8	1034300	1034400
Heart	13-15	chr11	74636500	74636700
Heart	13-15	chr4	181796700	181796800
Heart	13-15	chr4	56215400	56215500
Heart	13-15	chr7	18972800	18972900
Heart	13-15	chr13	48592400	48592500
Heart	13-15	chr3	71731800	71731900
Heart	13-15	chr5	180436900	180437000
Heart	13-15	chr3	2697200	2697300
Heart	13-15	chr3	102152800	102152900
Heart	13-15	chr4	83194100	83194200
Heart	13-15	chr6	76359400	76359500
Heart	13-15	chr1	111979100	111979200
Heart	13-15	chr16	21648800	21649000
Heart	13-15	chr16	25702700	25702800
Heart	13-15	chr12	92424600	92424700
Heart	13-15	chr8	39747300	39747400
Heart	13-15	chr5	99875200	99875300
Heart	13-15	chr9	27574300	27574400
Heart	13-15	chr21	43892500	43892700
Heart	13-15	chr4	170065700	170065800
Heart	13-15	chr8	24472300	24472400
Heart	13-15	chr12	75907900	75908200
Heart	13-15	chr5	33769600	33769700
Heart	13-15	chr7	80997200	80997300
Heart	13-15	chr1	246180900	246181000
Heart	13-15	chr8	770900	771000
Heart	13-15	chr10	115353400	115353500
Heart	13-15	chr2	4566900	4567000
Heart	13-15	chr13	108655700	108655800
Heart	13-15	chr6	154581200	154581300
Heart	13-15	chr11	19403000	19403200
Heart	13-15	chr8	589000	589100
Heart	13-15	chr13	108521400	108521500
Heart	13-15	chr16	81941900	81942000
Heart	13-15	chr16	4920000	4920100
Heart	13-15	chr2	63537700	63537800
Heart	13-15	chr9	90563900	90564000
Heart	13-15	chr16	57875900	57876000
Heart	13-15	chr13	42119700	42119800
Heart	13-15	chr17	37899300	37899400
Heart	13-15	chr10	35917400	35917500
Heart	13-15	chr13	21426300	21426400
Heart	13-15	chr17	63588600	63588700
Heart	13-15	chr22	27089700	27089800
Heart	13-15	chr10	123293400	123293500
Heart	13-15	chr21	19040700	19040800
Heart	13-15	chr1	8273200	8273400
Heart	13-15	chr13	74915000	74915100
Heart	13-15	chr6	43835600	43835800
Heart	13-15	chr19	31346200	31346300
Heart	13-15	chr8	6455600	6455700
Heart	13-15	chr13	110190400	110190500
Heart	13-15	chr13	65786900	65787000
Heart	13-15	chr7	89320800	89320900
Heart	13-15	chr1	6354200	6354300
Heart	13-15	chr12	16011300	16011400
Heart	13-15	chr17	39774000	39774100
Heart	13-15	chr9	111025200	111025300
Heart	13-15	chr5	74967400	74967500
Heart	13-15	chr4	167122700	167122800
Heart	13-15	chr3	31921900	31922100
Heart	13-15	chr6	169643400	169643500
Heart	13-15	chr6	115440500	115440600
Heart	13-15	chr17	75679700	75679800
Heart	13-15	chr17	19237100	19237200
Heart	13-15	chr5	149686900	149687000
Heart	13-15	chr9	136385100	136385200
Heart	13-15	chr16	68525600	68525700
Heart	13-15	chr1	17519100	17519300
Heart	13-15	chr11	112977800	112977900
Heart	13-15	chr3	151081800	151081900
Heart	13-15	chr1	197486900	197487000
Heart	13-15	chr13	98683400	98683500
Heart	13-15	chr2	193271800	193271900
Heart	13-15	chr10	50014500	50014600
Heart	13-15	chr1	95395500	95395600
Heart	13-15	chr5	106652600	106652700
Heart	13-15	chr12	15166700	15166800
Heart	13-15	chr21	16621600	16621700
Heart	13-15	chr13	95924500	95924600
Heart	13-15	chr9	124814400	124814500
Heart	13-15	chr6	125945400	125945500
Heart	13-15	chr11	112735200	112735300
Heart	13-15	chr6	19811400	19811600
Heart	13-15	chr5	131799300	131799400
Heart	13-15	chr17	1061600	1061700
Heart	13-15	chr13	85248500	85248600
Heart	13-15	chr9	89560400	89560500
Heart	13-15	chr10	8151400	8151500
Heart	13-15	chr5	175256900	175257000
Heart	13-15	chr5	160942800	160942900
Heart	13-15	chr8	50283500	50283600
Heart	13-15	chr8	126625300	126625400
Heart	13-15	chr3	71954900	71955000
Heart	13-15	chr7	25813600	25813700
Heart	13-15	chr9	112629700	112629800
Heart	13-15	chr11	110815500	110815600
Heart	13-15	chr2	9717100	9717200
Heart	13-15	chr2	234183900	234184000
Heart	13-15	chr18	10877800	10877900
Heart	13-15	chr5	146465000	146465100
Heart	13-15	chr8	62782300	62782400
Heart	13-15	chr1	191071900	191072000
Heart	13-15	chr11	60636700	60636800
Heart	13-15	chr9	128210000	128210100
Heart	13-15	chr12	124740900	124741000
Heart	13-15	chr1	54498000	54498100
Heart	13-15	chr6	146723700	146723800
Heart	13-15	chr7	31351100	31351300
Heart	13-15	chr21	43388100	43388200
Heart	13-15	chr16	49537600	49537700
Heart	13-15	chr9	130365900	130366000
Heart	13-15	chr6	51882700	51882800
Heart	13-15	chr5	71107300	71107400
Heart	13-15	chr11	45680300	45680400
Heart	13-15	chr9	27480300	27480400
Heart	13-15	chr12	8128700	8128800
Heart	13-15	chr4	158042200	158042400
Heart	13-15	chr16	65215400	65215500
Heart	13-15	chr2	8767500	8767600
Heart	13-15	chr5	32712300	32712400
Heart	13-15	chr2	143733200	143733500
Heart	13-15	chr3	128420300	128420400
Heart	13-15	chr7	93930800	93930900
Heart	13-15	chr8	32233400	32233700
Heart	13-15	chr13	97624000	97624200
Heart	13-15	chr5	164334200	164334300
Heart	13-15	chr3	7889400	7889500
Heart	13-15	chr4	152518300	152518400
Heart	13-15	chr9	27369700	27369800
Heart	13-15	chr2	27567500	27567600
Heart	13-15	chr2	236936100	236936200
Heart	13-15	chr2	160308800	160308900
Heart	13-15	chr6	64230900	64231000
Heart	13-15	chr5	154663200	154663400
Heart	13-15	chr4	7433800	7433900
Heart	13-15	chr2	97440400	97440500
Heart	13-15	chr8	54600800	54600900
Heart	13-15	chr1	16483900	16484100
Heart	13-15	chr10	131979900	131980000
Heart	13-15	chr1	233146000	233146100
Heart	13-15	chr11	134257300	134257400
Heart	13-15	chr5	11867000	11867300
Heart	13-15	chr8	24284100	24284200
Heart	13-15	chr4	130945100	130945200
Heart	13-15	chr3	45534700	45534800
Heart	13-15	chr1	236319200	236319300
Heart	13-15	chr9	121153300	121153400
Heart	13-15	chr3	159444100	159444200
Heart	13-15	chr3	169317000	169317100
Heart	13-15	chr11	11316400	11316600
Heart	13-15	chr1	31043900	31044000
Heart	13-15	chr9	93462600	93462700
Heart	13-15	chr3	47650500	47650600
Heart	13-15	chr10	104271800	104271900
Heart	13-15	chr6	116822200	116822300
Heart	13-15	chr7	104005100	104005200
Heart	13-15	chr16	7849500	7849600
Heart	13-15	chr4	131925200	131925300
Heart	13-15	chr10	2905100	2905300
Heart	13-15	chr7	7644700	7644800
Heart	13-15	chr18	7104500	7104600
Heart	13-15	chr14	104684700	104684800
Heart	13-15	chr8	99188100	99188200
Heart	13-15	chr8	112031400	112031500
Heart	13-15	chr12	128568000	128568100
Heart	13-15	chr15	42157700	42157800
Heart	13-15	chr7	130566600	130566700
Heart	13-15	chr2	230535200	230535300
Heart	13-15	chr19	5776500	5776600
Heart	13-15	chr2	181264900	181265000
Heart	13-15	chr5	73941700	73941800
Heart	13-15	chr6	126222800	126222900
Heart	13-15	chr12	21812700	21812800
Heart	13-15	chr8	142662100	142662300
Heart	13-15	chr15	62798200	62798300
Heart	13-15	chr4	122653600	122653700
Heart	13-15	chr9	118187700	118187900
Heart	13-15	chr7	86135400	86135500
Heart	13-15	chr3	87401600	87401700
Heart	13-15	chr6	13470400	13470600
Heart	13-15	chr19	7959400	7959500
Heart	13-15	chr16	642700	642800
Heart	13-15	chr15	79842800	79842900
Heart	13-15	chr16	85065200	85065300
Heart	13-15	chr9	90197400	90197500
Heart	13-15	chr20	39036400	39036500
Heart	13-15	chr18	3434700	3434800
Heart	13-15	chr6	33994500	33994600
Heart	13-15	chr1	42892900	42893000
Heart	13-15	chr16	57883400	57883500
Heart	13-15	chr4	132293500	132293600
Heart	13-15	chr1	7700000	7700100
Heart	13-15	chr6	142883100	142883200
Heart	13-15	chr2	238855900	238856000
Heart	13-15	chr2	106775600	106775700
Heart	13-15	chr1	94223500	94223600
Heart	13-15	chr10	9636900	9637000
Heart	13-15	chr8	101793900	101794000
Heart	13-15	chr17	65120600	65120700
Heart	13-15	chr6	169077200	169077300
Heart	13-15	chr14	38919700	38919800
Heart	13-15	chr11	58945800	58945900
Heart	13-15	chr1	200489600	200489700
Heart	13-15	chr14	55613100	55613200
Heart	13-15	chr5	175612800	175612900
Heart	13-15	chr11	87570900	87571000
Heart	13-15	chr1	1071200	1071300
Heart	13-15	chr2	230286900	230287000
Heart	13-15	chr1	18732000	18732100
Heart	13-15	chr16	22141800	22141900
Heart	13-15	chr6	121088500	121088600
Heart	13-15	chr7	47505000	47505100
Heart	13-15	chr7	53180300	53180400
Heart	13-15	chr6	39850200	39850300
Heart	13-15	chr15	60474300	60474400
Heart	13-15	chr22	29379800	29380000
Heart	13-15	chr22	23840600	23840700
Heart	13-15	chr11	128837500	128837600
Heart	13-15	chr3	119379400	119379500
Heart	13-15	chr12	81510700	81510800
Heart	13-15	chr10	122735600	122735700
Heart	13-15	chr15	52582800	52582900
Heart	13-15	chr17	53400900	53401000
Heart	13-15	chr7	9680400	9680500
Heart	13-15	chr9	137868000	137868100
Heart	13-15	chr18	23440000	23440100
Heart	13-15	chr19	15434900	15435000
Heart	13-15	chr16	61044400	61044500
Heart	13-15	chr4	172628000	172628100
Heart	13-15	chr3	54361000	54361100
Heart	13-15	chr11	34994300	34994400
Heart	13-15	chr12	87290300	87290400
Heart	13-15	chr1	234894900	234895100
Heart	13-15	chr17	61396400	61396600
Heart	13-15	chr6	168602300	168602400
Heart	13-15	chr6	15138300	15138400
Heart	13-15	chr6	168607500	168607600
Heart	13-15	chr8	101471100	101471300
Heart	13-15	chr5	76330300	76330400
Heart	13-15	chr12	126963000	126963100
Heart	13-15	chr8	50201300	50201400
Heart	13-15	chr18	50258700	50258800
Heart	13-15	chr6	14706600	14706700
Heart	13-15	chr18	76635300	76635400
Heart	13-15	chr11	10510700	10510800
Heart	13-15	chr6	18536100	18536200
Heart	13-15	chr5	99304600	99304700
Heart	13-15	chr12	48431900	48432000
Heart	13-15	chr7	65424800	65424900
Heart	13-15	chr12	106341700	106341900
Heart	13-15	chr2	146414400	146414500
Heart	13-15	chr2	49461100	49461200
Heart	13-15	chr20	2910200	2910300
Heart	13-15	chr4	165781500	165781600
Heart	13-15	chr20	49096000	49096100
Heart	13-15	chr4	31648100	31648200
Heart	13-15	chr3	60125400	60125500
Heart	13-15	chr19	33115300	33115400
Heart	13-15	chr4	32768600	32768700
Heart	13-15	chr1	22566000	22566100
Heart	13-15	chr7	28448500	28448600
Heart	13-15	chr12	110537700	110537800
Heart	13-15	chr16	29775400	29775500
Heart	13-15	chr15	26327300	26327400
Heart	13-15	chr14	100998800	100998900
Heart	13-15	chr10	83558600	83558700
Heart	13-15	chr22	23292900	23293000
Heart	13-15	chr14	24187200	24187300
Heart	13-15	chr8	23560800	23561100
Heart	13-15	chr1	30459200	30459300
Heart	13-15	chr18	54120600	54120700
Heart	13-15	chr12	23658500	23658600
Heart	13-15	chr9	36640300	36640400
Heart	13-15	chr1	23255800	23255900
Heart	13-15	chr1	177420700	177420800
Heart	13-15	chr18	13209500	13209600
Heart	13-15	chr8	39853600	39853900
Heart	13-15	chr1	4170900	4171000
Heart	13-15	chr16	78724200	78724300
Heart	13-15	chr15	80992000	80992300
Heart	13-15	chr9	125576600	125576700
Heart	13-15	chr2	28304100	28304200
Heart	13-15	chr13	30060600	30060700
Heart	13-15	chr10	123128300	123128400
Heart	13-15	chr14	103556900	103557000
Heart	13-15	chr15	30238200	30238300
Heart	13-15	chr3	152206600	152206700
Heart	13-15	chr8	18811000	18811100
Heart	13-15	chr20	17692600	17692700
Heart	13-15	chr15	88649200	88649300
Heart	13-15	chr16	31949500	31949600
Heart	13-15	chr11	71017800	71017900
Heart	13-15	chr2	1128100	1128200
Heart	13-15	chr11	9092700	9092800
Heart	13-15	chr15	27488500	27488600
Heart	13-15	chr12	105082000	105082100
Heart	13-15	chr12	99253200	99253300
Heart	13-15	chr5	8054300	8054400
Heart	13-15	chr3	174792500	174792600
Heart	13-15	chr10	3249300	3249400
Heart	13-15	chr18	39927900	39928000
Heart	13-15	chr7	149387800	149387900
Heart	13-15	chr12	104587100	104587200
Heart	13-15	chr11	69484200	69484300
Heart	13-15	chr4	2575300	2575400
Heart	13-15	chr6	43054400	43054500
Heart	13-15	chr12	64656400	64656500
Heart	13-15	chr5	12908200	12908300
Heart	13-15	chr1	187231000	187231100
Heart	13-15	chr6	43076700	43076800
Heart	13-15	chr20	2967400	2967500
Heart	13-15	chr7	156258600	156258700
Heart	13-15	chr10	4817800	4817900
Heart	13-15	chr5	54274500	54274700
Heart	13-15	chr2	13089300	13089400
Heart	13-15	chr2	85401800	85401900
Heart	13-15	chr1	46601800	46601900
Heart	13-15	chr12	106207800	106207900
Heart	13-15	chr3	14567400	14567500
Heart	13-15	chr16	82738400	82738500
Heart	13-15	chr8	121082700	121082800
Heart	13-15	chr18	62741900	62742000
Heart	13-15	chr5	146513800	146513900
Heart	13-15	chr8	2164300	2164400
Heart	13-15	chr9	128992700	128992800
Heart	13-15	chr16	84483400	84483500
Heart	13-15	chr6	24951600	24951700
Heart	13-15	chr4	188146700	188146800
Heart	13-15	chr10	2676400	2676500
Heart	13-15	chr17	13453800	13453900
Heart	13-15	chr3	193686200	193686300
Heart	13-15	chr16	19740700	19740800
Heart	13-15	chr17	53570200	53570300
Heart	13-15	chr8	5877800	5878000
Heart	13-15	chr11	70959200	70959600
Heart	13-15	chr19	31634200	31634300
Heart	13-15	chr19	40449100	40449200
Heart	13-15	chr3	197581700	197581800
Heart	13-15	chr13	96097600	96097700
Heart	13-15	chr8	3942200	3942300
Heart	13-15	chr8	34705800	34705900
Heart	13-15	chr10	1797600	1797700
Heart	13-15	chr18	45131100	45131200
Heart	13-15	chr2	235121200	235121300
Heart	13-15	chr14	78803100	78803200
Heart	13-15	chr2	202993700	202993800
Heart	13-15	chr4	175072400	175072500
Heart	13-15	chr3	20030700	20030800
Heart	13-15	chr4	95366600	95366700
Heart	13-15	chr2	14713000	14713100
Heart	13-15	chr8	27212200	27212300
Heart	13-15	chr20	802100	802200
Heart	13-15	chr20	35959100	35959200
Heart	13-15	chr14	32801200	32801400
Heart	13-15	chr11	91895400	91895500
Heart	13-15	chr8	98931400	98931500
Heart	13-15	chr18	10287600	10287700
Heart	13-15	chr2	38943200	38943300
Heart	13-15	chr3	38303700	38303800
Heart	13-15	chr2	111567100	111567200
Heart	13-15	chr21	43818600	43818700
Heart	13-15	chr11	84797100	84797200
Heart	13-15	chr14	27586300	27586400
Heart	13-15	chr1	54926100	54926200
Heart	13-15	chr2	107939700	107939800
Heart	13-15	chr5	164634400	164634500
Heart	13-15	chr7	97461000	97461100
Heart	13-15	chr7	147280100	147280200
Heart	13-15	chr11	22818800	22818900
Heart	13-15	chr10	80672800	80672900
Heart	13-15	chr20	14542800	14542900
Heart	13-15	chr11	133791300	133791400
Heart	13-15	chr7	66408500	66408600
Heart	13-15	chr1	32276700	32276800
Heart	13-15	chr8	56229000	56229100
Heart	13-15	chr10	10710100	10710400
Heart	13-15	chr10	16159900	16160000
Heart	13-15	chr16	27464400	27464500
Heart	13-15	chr2	114635200	114635300
Heart	13-15	chr13	98528500	98528600
Heart	13-15	chr11	19627000	19627100
Heart	13-15	chr20	25479000	25479100
Heart	13-15	chr7	115769500	115769600
Heart	13-15	chr4	152637900	152638000
Heart	13-15	chr15	63765100	63765200
Heart	13-15	chr2	234904300	234904400
Heart	13-15	chr11	45537300	45537400
Heart	13-15	chr10	98611600	98611700
Heart	13-15	chr8	70293000	70293200
Heart	13-15	chr13	41107300	41107400
Heart	13-15	chr2	36757000	36757100
Heart	13-15	chr13	95925200	95925300
Heart	13-15	chr7	73799200	73799300
Heart	13-15	chr18	56983200	56983300
Heart	13-15	chr9	115261000	115261100
Heart	13-15	chr15	26911100	26911200
Heart	13-15	chr10	61728200	61728300
Heart	13-15	chr16	24681500	24681600
Heart	13-15	chr10	1019600	1019900
Heart	13-15	chr7	89163600	89163700
Heart	13-15	chr1	1926600	1926700
Heart	13-15	chr6	1056600	1056700
Heart	13-15	chr13	29061400	29061500
Heart	13-15	chr14	92909500	92909600
Heart	13-15	chr19	16256100	16256200
Heart	13-15	chr17	41099400	41099500
Heart	13-15	chr2	126906700	126906800
Heart	13-15	chr6	159858000	159858100
Heart	13-15	chr11	100286500	100286700
Heart	13-15	chr14	33133000	33133100
Heart	13-15	chr20	61964800	61964900
Heart	13-15	chr1	113834500	113834600
Heart	13-15	chr11	70827800	70827900
Heart	13-15	chr10	134228000	134228100
Heart	13-15	chr20	30880800	30880900
Heart	13-15	chr2	103773700	103773800
Heart	13-15	chr1	56900200	56900400
Heart	13-15	chr3	126375400	126375500
Heart	13-15	chr1	117991000	117991100
Heart	13-15	chr10	3494500	3494600
Heart	13-15	chr1	40400300	40400500
Heart	13-15	chr10	10340200	10340300
Heart	13-15	chr2	195000	195100
Heart	13-15	chr2	1128300	1128400
Heart	13-15	chr4	8003700	8003800
Heart	13-15	chr22	32958700	32958800
Heart	13-15	chr8	24579800	24579900
Heart	13-15	chr6	113086900	113087100
Heart	13-15	chr3	74543300	74543400
Heart	13-15	chr20	32060700	32060800
Heart	13-15	chr21	29697800	29697900
Heart	13-15	chr1	239146300	239146400
Heart	13-15	chr10	25422200	25422300
Heart	13-15	chr1	235089900	235090100
Heart	13-15	chr15	29778900	29779000
Heart	13-15	chr16	56707000	56707200
Heart	13-15	chr14	35814900	35815000
Heart	13-15	chr3	65183600	65183700
Heart	13-15	chr7	9631200	9631300
Heart	13-15	chr1	30104100	30104200
Heart	13-15	chr12	47662400	47662600
Heart	13-15	chr5	151074400	151074500
Heart	13-15	chr17	11923400	11923500
Heart	13-15	chr14	57764500	57764600
Heart	13-15	chr22	39983400	39983500
Heart	13-15	chr1	14160000	14160100
Heart	13-15	chr2	239753300	239753500
Heart	13-15	chr11	58904800	58904900
Heart	13-15	chr5	112737500	112737700
Heart	13-15	chr4	99086900	99087000
Heart	13-15	chr9	99096600	99096700
Heart	13-15	chr2	234881700	234881800
Heart	13-15	chr1	209183300	209183400
Heart	13-15	chr6	109027400	109027600
Heart	13-15	chr4	184169800	184169900
Heart	13-15	chr14	57712400	57712500
Heart	13-15	chr7	67179200	67179300
Heart	13-15	chr1	48022500	48022700
Heart	13-15	chr18	20751900	20752000
Heart	13-15	chr8	68095100	68095200
Heart	13-15	chr10	124830000	124830100
Heart	13-15	chr14	52294300	52294400
Heart	13-15	chr7	117822500	117822600
Heart	13-15	chr16	79936700	79936800
Heart	13-15	chr18	74742400	74742500
Heart	13-15	chr2	144103800	144103900
Heart	13-15	chr21	42898900	42899000
Heart	13-15	chr4	106296300	106296400
Heart	13-15	chr2	160054900	160055000
Heart	13-15	chr5	75166600	75166700
Heart	13-15	chr21	47504700	47504800
Heart	13-15	chr16	46797500	46797600
Heart	13-15	chr4	90632800	90632900
Heart	13-15	chr4	135021300	135021400
Heart	13-15	chr5	6486700	6486800
Heart	13-15	chr22	46313500	46313600
Heart	13-15	chr1	204602200	204602400
Heart	13-15	chr14	88114600	88114700
Heart	13-15	chr5	41617400	41617500
Heart	13-15	chr6	125208900	125209000
Heart	13-15	chr12	54140200	54140300
Heart	13-15	chr9	138458200	138458300
Heart	13-15	chr2	235452500	235452600
Heart	13-15	chr7	12673200	12673500
Heart	13-15	chr9	92497300	92497400
Heart	13-15	chr14	91861700	91861800
Heart	13-15	chr18	77980400	77980500
Heart	13-15	chr12	14617000	14617100
Heart	13-15	chr1	96675000	96675100
Heart	13-15	chr10	4259300	4259400
Heart	13-15	chr17	77057200	77057300
Heart	13-15	chr1	14159300	14159400
Heart	13-15	chr10	12485100	12485200
Heart	13-15	chr6	84068800	84068900
Heart	13-15	chr8	113515200	113515300
Heart	13-15	chr14	41769300	41769400
Heart	13-15	chr4	153915200	153915300
Heart	13-15	chr22	34911900	34912100
Heart	13-15	chr5	59512000	59512100
Heart	13-15	chr6	18560500	18560700
Heart	13-15	chr1	24062800	24062900
Heart	13-15	chr1	229952100	229952200
Heart	13-15	chr5	173760800	173761000
Heart	13-15	chr16	89805200	89805300
Heart	13-15	chr18	46943700	46943800
Heart	13-15	chr6	76929700	76929800
Heart	13-15	chr22	45188200	45188300
Heart	13-15	chr22	25097200	25097300
Heart	13-15	chr20	24900600	24900800
Heart	13-15	chr2	88876100	88876300
Heart	13-15	chr18	18720800	18720900
Heart	13-15	chr2	83504600	83504700
Heart	13-15	chr2	121898900	121899000
Heart	13-15	chr6	97093300	97093400
Heart	13-15	chr6	106615700	106615900
Heart	13-15	chr20	19579500	19579600
Heart	13-15	chr1	198216200	198216300
Heart	13-15	chr2	193305600	193305700
Heart	13-15	chr3	130435500	130435600
Heart	13-15	chr21	46013000	46013100
Heart	13-15	chr2	74726400	74726500
Heart	13-15	chr6	50455700	50455800
Heart	13-15	chr11	80528800	80528900
Heart	13-15	chr2	141728600	141728700
Heart	13-15	chr5	135419700	135419800
Heart	13-15	chr10	127232800	127232900
Heart	13-15	chr4	44577000	44577100
Heart	13-15	chr9	31709700	31709800
Heart	13-15	chr6	167628300	167628400
Heart	13-15	chr7	89564600	89564800
Heart	13-15	chr1	36175400	36175500
Heart	13-15	chr22	46157100	46157200
Heart	13-15	chr6	134445800	134445900
Heart	13-15	chr17	72371800	72371900
Heart	13-15	chr8	49670500	49670600
Heart	13-15	chr4	121998900	121999100
Heart	13-15	chr11	71478200	71478300
Heart	13-15	chr5	45564900	45565000
Heart	13-15	chr6	117297300	117297400
Heart	13-15	chr9	76957900	76958100
Heart	13-15	chr19	14146000	14146100
Heart	13-15	chr9	35352900	35353000
Heart	13-15	chr10	18352400	18352500
Heart	13-15	chr1	168000300	168000400
Heart	13-15	chr1	65808000	65808100
Heart	13-15	chr16	84655000	84655200
Heart	13-15	chr14	69801300	69801400
Heart	13-15	chr3	48661300	48661400
Heart	13-15	chr7	100351100	100351200
Heart	13-15	chr3	7334900	7335000
Heart	13-15	chr3	117570600	117570700
Heart	13-15	chr19	21264400	21264500
Heart	13-15	chr20	47964100	47964200
Heart	13-15	chr2	210336900	210337000
Heart	13-15	chr15	94708100	94708200
Heart	13-15	chr6	42330600	42330700
Heart	13-15	chr10	100061900	100062000
Heart	13-15	chr14	98511600	98511700
Heart	13-15	chr4	101987400	101987500
Heart	13-15	chr10	35523800	35523900
Heart	13-15	chr5	16810200	16810300
Heart	13-15	chr16	57929300	57929400
Heart	13-15	chr4	40087300	40087400
Heart	13-15	chr8	142334000	142334100
Heart	13-15	chr8	19917000	19917100
Heart	13-15	chr17	30337100	30337200
Heart	13-15	chr22	19792600	19792700
Heart	13-15	chr6	129212000	129212100
Heart	13-15	chr5	26386200	26386300
Heart	13-15	chr13	99330000	99330100
Heart	13-15	chr7	137870000	137870100
Heart	13-15	chr6	14477100	14477200
Heart	13-15	chr2	19332200	19332300
Heart	13-15	chr1	199250500	199250600
Heart	13-15	chr4	134712600	134712700
Heart	13-15	chr14	27596300	27596400
Heart	13-15	chr5	3912000	3912100
Heart	13-15	chr13	58375000	58375100
Heart	13-15	chr5	74238800	74238900
Heart	13-15	chr17	65612200	65612300
Heart	13-15	chr7	130052600	130052700
Heart	13-15	chr9	32066100	32066200
Heart	13-15	chr10	14726200	14726300
Heart	13-15	chr16	73048800	73049100
Heart	13-15	chr20	60098400	60098500
Heart	13-15	chr9	90495100	90495200
Heart	13-15	chr6	85395400	85395500
Heart	13-15	chr6	87359800	87359900
Heart	13-15	chr14	46720400	46720500
Heart	13-15	chr14	91837200	91837400
Heart	13-15	chr18	52630500	52630600
Heart	13-15	chr4	187842700	187842800
Heart	13-15	chr20	61961400	61961500
Heart	13-15	chr13	57914800	57914900
Heart	13-15	chr2	228979200	228979300
Heart	13-15	chr13	43795500	43795600
Heart	13-15	chr9	87480100	87480300
Heart	13-15	chr2	119722400	119722500
Heart	13-15	chr8	121809000	121809100
Heart	13-15	chr4	134829800	134830000
Heart	13-15	chr8	78684000	78684100
Heart	13-15	chr16	49033300	49033600
Heart	13-15	chr9	94334900	94335000
Heart	13-15	chr12	116496800	116496900
Heart	13-15	chr16	65705100	65705200
Heart	13-15	chr2	147930600	147930700
Heart	13-15	chr13	101735900	101736000
Heart	13-15	chr6	44082600	44082700
Heart	13-15	chr10	77140700	77140800
Heart	13-15	chr5	179109300	179109400
Heart	13-15	chr10	73338800	73338900
Heart	13-15	chr6	20934100	20934200
Heart	13-15	chr2	120610600	120610700
Heart	13-15	chr2	206671400	206671700
Heart	13-15	chr16	12635500	12635600
Heart	13-15	chr11	32853500	32853600
Heart	13-15	chr15	86726900	86727000
Heart	13-15	chr6	101962200	101962300
Heart	13-15	chr16	11711100	11711200
Heart	13-15	chr14	35816300	35816400
Heart	13-15	chr11	122089000	122089100
Heart	13-15	chr10	135030600	135030700
Heart	13-15	chr21	33340900	33341000
Heart	13-15	chr6	15090000	15090100
Heart	13-15	chr13	46481200	46481300
Heart	13-15	chr2	56013200	56013300
Heart	13-15	chr16	6466300	6466400
Heart	13-15	chr1	71000000	71000100
Heart	13-15	chr12	25649500	25649600
Heart	13-15	chr12	67438800	67438900
Heart	13-15	chr5	3081900	3082000
Heart	13-15	chr10	88426600	88426700
Heart	13-15	chr5	11423300	11423400
Heart	13-15	chr12	5018700	5018800
Heart	13-15	chr7	34118800	34118900
Heart	13-15	chr16	73749100	73749200
Heart	13-15	chr6	23129000	23129100
Heart	13-15	chr1	7393100	7393200
Heart	13-15	chr18	1900300	1900400
Heart	13-15	chr12	93262600	93262700
Heart	13-15	chr12	25649300	25649400
Heart	13-15	chr7	156402900	156403000
Heart	13-15	chr8	126311600	126311700
Heart	13-15	chr8	90071700	90071800
Heart	13-15	chr2	145000100	145000200
Heart	13-15	chr4	72865500	72865600
Heart	13-15	chr17	57586500	57586600
Heart	13-15	chr16	60376100	60376200
Heart	13-15	chr2	176742400	176742500
Heart	13-15	chr15	101968300	101968600
Heart	13-15	chr6	168599500	168599600
Heart	13-15	chr2	137285500	137285600
Heart	13-15	chr12	76879100	76879200
Heart	13-15	chr2	186540400	186540500
Heart	13-15	chr6	39185300	39185400
Heart	13-15	chr12	114283100	114283200
Heart	13-15	chr6	41379600	41379700
Heart	13-15	chr1	163110700	163110800
Heart	13-15	chr5	11894200	11894300
Heart	13-15	chr8	117464100	117464200
Heart	13-15	chr2	80296300	80296400
Heart	13-15	chr19	45303500	45303700
Heart	13-15	chr10	105834100	105834200
Heart	13-15	chr4	133124600	133124700
Heart	13-15	chr17	44343000	44343100
Heart	13-15	chr1	14222000	14222100
Heart	13-15	chr10	87819800	87819900
Heart	13-15	chr19	30398700	30398800
Heart	13-15	chr7	43364300	43364400
Heart	13-15	chr1	59700000	59700100
Heart	13-15	chr8	111908500	111908600
Heart	13-15	chr9	9513900	9514000
Heart	13-15	chr16	62426300	62426400
Heart	13-15	chr10	127380100	127380200
Heart	13-15	chr1	218851600	218851700
Heart	13-15	chr16	80983700	80983800
Heart	13-15	chr7	86112500	86112600
Heart	13-15	chr3	2848300	2848600
Heart	13-15	chr6	5961500	5961600
Heart	13-15	chr7	53949900	53950000
Heart	13-15	chr5	388600	388700
Heart	13-15	chr6	168706300	168706400
Heart	13-15	chr19	54937900	54938000
Heart	13-15	chr1	75244500	75244600
Heart	13-15	chr8	120629900	120630000
Heart	13-15	chr7	155350400	155350500
Heart	13-15	chr4	6750700	6750800
Heart	13-15	chr5	18301300	18301400
Heart	13-15	chr14	31713300	31713400
Heart	13-15	chr9	13910000	13910100
Heart	13-15	chr8	52702700	52702800
Heart	13-15	chr16	55747900	55748000
Heart	13-15	chr4	105871500	105871600
Heart	13-15	chr8	55062000	55062100
Heart	13-15	chr11	120906100	120906200
Heart	13-15	chr1	77458700	77458900
Heart	13-15	chr12	83312600	83312700
Heart	13-15	chr8	105352500	105352600
Heart	13-15	chr12	102339800	102339900
Heart	18-19	chr8	125410000	125410200
Heart	18-19	chr13	39798800	39798900
Heart	18-19	chr13	106920900	106921000
Heart	18-19	chr6	108078200	108078300
Heart	18-19	chr2	227405300	227405400
Heart	18-19	chr1	167080000	167080100
Heart	18-19	chr11	108026000	108026100
Heart	18-19	chr12	100975700	100976000
Heart	18-19	chr2	181934400	181934500
Heart	18-19	chr1	78484000	78484100
Heart	18-19	chr12	86909000	86909100
Heart	18-19	chr1	90658000	90658200
Heart	18-19	chr4	93676500	93676600
Heart	18-19	chr20	8659800	8659900
Heart	18-19	chr2	164441400	164441500
Heart	18-19	chr4	189372400	189372500
Heart	18-19	chr18	64711400	64711600
Heart	18-19	chr10	92433100	92433200
Heart	18-19	chr1	231280500	231280600
Heart	18-19	chr1	118030300	118030500
Heart	18-19	chr3	26723100	26723200
Heart	18-19	chr5	128361400	128361500
Heart	18-19	chr10	10990400	10990500
Heart	18-19	chr3	137078600	137078800
Heart	18-19	chr8	64616100	64616200
Heart	18-19	chr3	142528500	142528600
Heart	18-19	chr10	90806200	90806300
Heart	18-19	chr20	12142700	12142900
Heart	18-19	chr5	64429000	64429200
Heart	18-19	chr6	106425200	106425300
Heart	18-19	chr4	150913500	150913600
Heart	18-19	chr3	21591000	21591100
Heart	18-19	chr11	42182600	42182700
Heart	18-19	chr2	63823800	63823900
Heart	18-19	chr6	135369400	135369500
Heart	18-19	chr10	85080800	85080900
Heart	18-19	chr18	39008400	39008500
Heart	18-19	chr3	142017500	142017600
Heart	18-19	chr4	111050100	111050200
Heart	18-19	chr11	103892600	103892700
Heart	18-19	chr2	163837000	163837100
Heart	18-19	chr3	129829500	129829600
Heart	18-19	chr7	71931400	71931500
Heart	18-19	chr10	37178200	37178300
Heart	18-19	chr11	16059200	16059400
Heart	18-19	chr4	182693200	182693300
Heart	18-19	chr11	57460700	57460800
Heart	18-19	chr4	61401100	61401200
Heart	18-19	chr4	37628200	37628300
Heart	18-19	chr8	130441800	130441900
Heart	18-19	chr3	82047200	82047300
Heart	18-19	chr10	84133000	84133100
Heart	18-19	chr4	107467600	107467700
Heart	18-19	chr5	14709500	14709800
Heart	18-19	chr4	150232500	150232600
Heart	18-19	chr10	112473800	112473900
Heart	18-19	chr4	13258000	13258100
Heart	18-19	chr4	9675100	9675200
Heart	18-19	chr5	82432500	82432600
Heart	18-19	chr7	3537600	3537800
Heart	18-19	chr4	182641100	182641200
Heart	18-19	chr5	178514800	178515000
Heart	18-19	chr3	116345800	116345900
Heart	18-19	chr4	92164800	92164900
Heart	18-19	chr6	124358400	124358500
Heart	18-19	chr5	44419700	44419800
Heart	18-19	chr12	22159800	22159900
Heart	18-19	chr1	195866200	195866300
Heart	18-19	chr16	30801600	30801700
Heart	18-19	chr7	7084800	7084900
Heart	18-19	chr4	163472200	163472300
Heart	18-19	chr11	76208800	76208900
Heart	18-19	chr7	18702900	18703000
Heart	18-19	chr1	78568400	78568600
Heart	18-19	chr1	101578100	101578200
Heart	18-19	chr2	67576100	67576200
Heart	18-19	chr6	100193500	100193600
Heart	18-19	chr2	211212100	211212300
Heart	18-19	chr6	102582000	102582100
Heart	18-19	chr3	131893600	131893700
[truncated: 68,094 more rows]

## Sheet: Supplementary Table 3
Supplementary Table 3. Summary of the RNA-Seq sample information.
The transcriptome information of each sample was obtained by RNA-Seq.
Tissue	Stage (week)	Replicate	Sample	Total Reads	Uniq Mapped Reads
Heart	13-15	Rep1	Heart_13-15w_1	43178468	41166351
		Rep2	Heart_13-15w_2	56583403	48823138
	18-19	Rep1	Heart_18-19w_1	28037325	20579397
		Rep2	Heart_18-19w_2	79369860	73052022
	21-23	Rep1	Heart_21-23w_1	100132811	82739742
		Rep2	Heart_21-23w_2	36460178	28963965
	25-28	Rep1	Heart_25-28w_1	28823927	23710562
		Rep2	Heart_25-28w_2	47894221	46955494
		Rep3	Heart_25-28w_3	17484533	16152212
Kidney	13-15	Rep1	Kidney_13-15w_1	45974040	43877624
		Rep2	Kidney_13-15w_2	27172279	20797662
	18-19	Rep1	Kidney_18-19w_1	31486840	29764510
		Rep2	Kidney_18-19w_2	68553162	65742482
		Rep3	Kidney_18-19w_3	40276738	38101794
	21-23	Rep1	Kidney_21-23w_1	40059071	24920748
		Rep2	Kidney_21-23w_2	9133596	6079321
	25-28	Rep1	Kidney_25-28w_1	41011355	38964888
		Rep2	Kidney_25-28w_2	45446222	40870893
		Rep3	Kidney_25-28w_3	64855373	60198757
		Rep4	Kidney_25-28w_4	40666161	37150130
Liver	13-15	Rep1	Liver_13-15w_1	30316859	27912732
		Rep2	Liver_13-15w_2	15865505	13730008
	18-19	Rep1	Liver_18-19w_1	32939429	31190345
		Rep2	Liver_18-19w_2	40235246	28078472
		Rep3	Liver_18-19w_3	32391920	30037027
	21-23	Rep1	Liver_21-23w_1	38347247	35847006
		Rep2	Liver_21-23w_2	9532769	6213459
	25-28	Rep1	Liver_25-28w_1	44484355	43483457
		Rep2	Liver_25-28w_2	44105055	39401434
		Rep3	Liver_25-28w_3	29253039	27837192
		Rep4	Liver_25-28w_4	15119897	9563335
Lung	13-15	Rep1	Lung_13-15w_1	57786979	53568530
		Rep2	Lung_13-15w_2	45942224	44968249
	18-19	Rep1	Lung_18-19w_1	46430431	41861677
		Rep2	Lung_18-19w_2	60622100	49766975
	21-23	Rep1	Lung_21-23w_1	95284344	81956966
		Rep2	Lung_21-23w_2	76545850	63425891
		Rep3	Lung_21-23w_3	30445028	23591852
	25-28	Rep1	Lung_25-28w_1	45033906	43917065
		Rep2	Lung_25-28w_2	67413413	59410184
		Rep3	Lung_25-28w_3	44080943	41506616

## Sheet: Supplementary Table 4
Supplementary Table 4. CEBPB-targeted Alu-proximal genes in foetal kidney.
Alu elements were filtered by their proximity to downstream genes, keeping those within 1000 bp upstream of a gene with proper orientation and observable expression (RPKM > 0.1) in at least one of the four stages.
Gene ID	Gene symbol	Basic annotation	Association with kidney development
ENSG00000105499	PLA2G4C	Phospholipase A2 group IVC	-
ENSG00000105963	ADAP1	ArfGAP with dual PH domains 1 [Source:HGNC Symbol;Acc:HGNC:16486]	-
ENSG00000116106	EPHA4	EPH receptor A4 [Source:HGNC Symbol;Acc:HGNC:3388]	Involved in MET, which depends on Pax-2, which is regulated by TGFB (Liu et al. Exp Nephrol, 1997)
ENSG00000130513	GDF15	Growth differentiation factor 15 [Source:HGNC Symbol;Acc:HGNC:30142]	TGF-beta superfamily protein; Diabetic kidney; injury (Calsson et al. Ups J Med Sci, 2020)
ENSG00000140564	FURIN	Furin, paired basic amino acid cleaving enzyme [Source:HGNC Symbol;Acc:HGNC:8568]	Cut and activate TGFBeta proteins (Dubois et al. Am J Pathol, 2001)
ENSG00000146457	WTAP	WT1 associated protein [Source:HGNC Symbol;Acc:HGNC:16846]	Interact with SMAD2/3 which is controlled by TGFbeta (Bertero et al. Nature, 2018)
ENSG00000161642	ZNF385A	Zinc finger protein 385A [Source:HGNC Symbol;Acc:HGNC:17521]	Binds to 3'UTR of CEBPA and regulate translation (UniProt)
ENSG00000162458	FBLIM1	Filamin binding LIM protein 1 [Source:HGNC Symbol;Acc:HGNC:24686]	Up-regulated after Unilateral Ureteric Obstruction (UUO) in mice (Arvaniti et al. Sci. Rep. 2016)
ENSG00000222009	BTBD19	BTB domain containing 19 [Source:HGNC Symbol;Acc:HGNC:27145]	Marker gene for NOTCH1 lumA phenotypes (Orzechowska, Jędroszka, and Bednarek, Oncotarget, 2017)
ENSG00000230623	AC104461.1	Novel transcript, antisense to ZNF281	-
ENSG00000255122	AC068587.2	40S ribosomal protein S24 (Rps24) pseudogene	-
ENSG00000257337	AC068888.1	Novel transcript, antisense to TENC1 & EIF4B	-

## Sheet: Supplementary Table 5
Supplementary Table 5. Summary of the RNA-BisSeq sample information.
The RNA m5C methylome of each sample were obtained by RNA-BisSeq.
Tissue	Stage (week)	Replicate	Sample	Total Reads	Uniq Mapped Reads	Luciferase Conversion Rate
Heart	13-15	Rep1	Heart_13-15w_1	193538278	115007722	0.9992
		Rep2	Heart_13-15w_2	193602098	115040638	0.9991
	18-19	Rep1	Heart_18-19w_1	203691244	107815828	0.9992
		Rep2	Heart_18-19w_2	203767214	108360236	0.9992
	25-28	Rep1	Heart_25-28w_1	263847772	93432744	0.9991
		Rep2	Heart_25-28w_2	222663736	78487582	0.9991
Kidney	13-15	Rep1	Kidney_13-15w_1	143451706	87825554	0.9992
		Rep2	Kidney_13-15w_2	143503750	86011554	0.9992
	18-19	Rep1	Kidney_18-19w_1	225759192	123778630	0.9992
		Rep2	Kidney_18-19w_2	214767706	118014764	0.9993
	25-28	Rep1	Kidney_25-28w_1	225259432	134857946	0.9992
		Rep2	Kidney_25-28w_2	222391240	131266422	0.9991
Liver	13-15	Rep1	Liver_13-15w_1	185961448	98253350	0.9992
		Rep2	Liver_13-15w_2	186026748	100959414	0.9992
	18-19	Rep1	Liver_18-19w_1	181082154	94444430	0.9992
		Rep2	Liver_18-19w_2	204075276	99365302	0.9992
	25-28	Rep1	Liver_25-28w_1	197655154	109895632	0.9992
		Rep2	Liver_25-28w_2	196696888	109351246	0.9992
Lung	13-15	Rep1	Lung_13-15w_1	177477032	101399376	0.9992
		Rep2	Lung_13-15w_2	177189334	85949018	0.9992
	18-19	Rep1	Lung_18-19w_1	227967970	128527480	0.9992
		Rep2	Lung_18-19w_2	228799022	125462756	0.9992
	25-28	Rep1	Lung_25-28w_1	175476372	104168566	0.9992
		Rep2	Lung_25-28w_2	180843868	97671132	0.9992

## Sheet: Supplementary Table 6
Supplementary Table 6. Organ-stage-specific genes from RNA-BisSeq data.
Organ-stage-specific genes were identified by ANOVA (Analysis of Variance). The P values were calculated using Benjamini-Hochberg method. The genes with fold change > 1.5 and P value < 0.05 were considered statistically significant.
Tissue-specific	Stage-specific	Gene ID
Heart	13-15	ENSG00000266953
Heart	13-15	ENSG00000138760
Heart	13-15	ENSG00000221890
Heart	13-15	ENSG00000197355
Heart	13-15	ENSG00000077157
Heart	13-15	ENSG00000141510
Heart	13-15	ENSG00000092470
Heart	13-15	ENSG00000077254
Heart	13-15	ENSG00000114554
Heart	13-15	ENSG00000153827
Heart	13-15	ENSG00000124374
Heart	13-15	ENSG00000166317
Heart	13-15	ENSG00000173706
Heart	13-15	ENSG00000109814
Heart	13-15	ENSG00000178878
Heart	13-15	ENSG00000255661
Heart	13-15	ENSG00000156928
Heart	13-15	ENSG00000116906
Heart	13-15	ENSG00000188493
Heart	13-15	ENSG00000140682
Heart	13-15	ENSG00000179862
Heart	13-15	ENSG00000178573
Heart	13-15	ENSG00000124788
Heart	13-15	ENSG00000169018
Heart	13-15	ENSG00000137094
Heart	13-15	ENSG00000198053
Heart	13-15	ENSG00000133065
Heart	13-15	ENSG00000077009
Heart	13-15	ENSG00000151640
Heart	13-15	ENSG00000105204
Heart	13-15	ENSG00000151176
Heart	13-15	ENSG00000007866
Heart	13-15	ENSG00000075399
Heart	13-15	ENSG00000153048
Heart	13-15	ENSG00000128050
Heart	13-15	ENSG00000170681
Heart	13-15	ENSG00000101144
Heart	13-15	ENSG00000117385
Heart	18-19	ENSG00000108840
Heart	18-19	ENSG00000166295
Heart	18-19	ENSG00000183072
Heart	18-19	ENSG00000128274
Heart	18-19	ENSG00000113296
Heart	18-19	ENSG00000125375
Heart	18-19	ENSG00000259494
Heart	18-19	ENSG00000164932
Heart	18-19	ENSG00000164304
Heart	18-19	ENSG00000154518
Heart	18-19	ENSG00000182199
Heart	18-19	ENSG00000176390
Heart	25-28	ENSG00000133243
Heart	25-28	ENSG00000119669
Heart	25-28	ENSG00000112320
Heart	25-28	ENSG00000185739
Heart	25-28	ENSG00000177732
Heart	25-28	ENSG00000154358
Heart	25-28	ENSG00000152402
Heart	25-28	ENSG00000174437
Heart	25-28	ENSG00000114354
Heart	25-28	ENSG00000182606
Heart	25-28	ENSG00000119335
Heart	25-28	ENSG00000114923
Heart	25-28	ENSG00000184702
Heart	25-28	ENSG00000166592
Heart	25-28	ENSG00000250722
Heart	25-28	ENSG00000100302
Heart	25-28	ENSG00000023228
Heart	25-28	ENSG00000168334
Heart	25-28	ENSG00000174233
Heart	25-28	ENSG00000177283
Heart	25-28	ENSG00000136574
Heart	25-28	ENSG00000162889
Heart	25-28	ENSG00000169021
Heart	25-28	ENSG00000063660
Heart	25-28	ENSG00000124831
Heart	25-28	ENSG00000166689
Heart	25-28	ENSG00000173641
Heart	25-28	ENSG00000102996
Heart	25-28	ENSG00000165238
Heart	25-28	ENSG00000149596
Heart	25-28	ENSG00000168724
Heart	25-28	ENSG00000205560
Heart	25-28	ENSG00000254413
Heart	25-28	ENSG00000139044
Heart	25-28	ENSG00000133657
Heart	25-28	ENSG00000107317
Heart	25-28	ENSG00000077522
Heart	25-28	ENSG00000221866
Heart	25-28	ENSG00000133454
Heart	25-28	ENSG00000170276
Heart	25-28	ENSG00000254445
Heart	25-28	ENSG00000122367
Heart	25-28	ENSG00000163820
Heart	25-28	ENSG00000163110
Heart	25-28	ENSG00000023902
Heart	25-28	ENSG00000149639
Heart	25-28	ENSG00000140795
Heart	25-28	ENSG00000143434
Heart	25-28	ENSG00000172366
Heart	25-28	ENSG00000129991
Heart	25-28	ENSG00000130529
Heart	25-28	ENSG00000146278
Heart	25-28	ENSG00000111275
Heart	25-28	ENSG00000257767
Heart	25-28	ENSG00000088888
Heart	25-28	ENSG00000122359
Heart	25-28	ENSG00000179564
Heart	25-28	ENSG00000174348
Heart	25-28	ENSG00000184601
Heart	25-28	ENSG00000133027
Heart	25-28	ENSG00000074590
Heart	25-28	ENSG00000107551
Heart	25-28	ENSG00000196535
Heart	25-28	ENSG00000165898
Heart	25-28	ENSG00000119508
Heart	25-28	ENSG00000165516
Heart	25-28	ENSG00000213853
Heart	25-28	ENSG00000160049
Heart	25-28	ENSG00000011105
Heart	25-28	ENSG00000130294
Heart	25-28	ENSG00000089225
Heart	25-28	ENSG00000177000
Heart	25-28	ENSG00000197780
Heart	25-28	ENSG00000165914
Heart	25-28	ENSG00000112531
Heart	25-28	ENSG00000051620
Heart	25-28	ENSG00000167136
Heart	25-28	ENSG00000170889
Heart	25-28	ENSG00000164440
Heart	25-28	ENSG00000171148
Heart	25-28	ENSG00000173156
Heart	25-28	ENSG00000070756
Heart	25-28	ENSG00000154556
Heart	25-28	ENSG00000061676
Heart	25-28	ENSG00000133028
Heart	25-28	ENSG00000092054
Heart	25-28	ENSG00000203867
Heart	25-28	ENSG00000171840
Heart	25-28	ENSG00000169554
Heart	25-28	ENSG00000145012
Heart	25-28	ENSG00000120438
Heart	25-28	ENSG00000140694
Heart	25-28	ENSG00000123191
Heart	25-28	ENSG00000114279
Heart	25-28	ENSG00000171634
Heart	25-28	ENSG00000198336
Heart	25-28	ENSG00000100994
Heart	25-28	ENSG00000170745
Heart	25-28	ENSG00000167281
Heart	25-28	ENSG00000146592
Kidney	13-15	ENSG00000171206
Kidney	13-15	ENSG00000187954
Kidney	13-15	ENSG00000149187
Kidney	13-15	ENSG00000157593
Kidney	13-15	ENSG00000163362
Kidney	13-15	ENSG00000113361
Kidney	13-15	ENSG00000053328
Kidney	13-15	ENSG00000127580
Kidney	13-15	ENSG00000183098
Kidney	13-15	ENSG00000240184
Kidney	13-15	ENSG00000240764
Kidney	13-15	ENSG00000242419
Kidney	13-15	ENSG00000107872
Kidney	13-15	ENSG00000165685
Kidney	13-15	ENSG00000179119
Kidney	13-15	ENSG00000141756
Kidney	18-19	ENSG00000072210
Kidney	18-19	ENSG00000134308
Kidney	18-19	ENSG00000250588
Kidney	18-19	ENSG00000197444
Kidney	18-19	ENSG00000073008
Kidney	18-19	ENSG00000057252
Kidney	18-19	ENSG00000137714
Kidney	18-19	ENSG00000147465
Kidney	18-19	ENSG00000110436
Kidney	18-19	ENSG00000163888
Kidney	18-19	ENSG00000177576
Kidney	18-19	ENSG00000215472
Kidney	18-19	ENSG00000142494
Kidney	18-19	ENSG00000241186
Kidney	18-19	ENSG00000198682
Kidney	18-19	ENSG00000151229
Kidney	18-19	ENSG00000161640
Kidney	18-19	ENSG00000109854
Kidney	18-19	ENSG00000107362
Kidney	18-19	ENSG00000228594
Kidney	18-19	ENSG00000137843
Kidney	18-19	ENSG00000259288
Kidney	18-19	ENSG00000161513
Kidney	18-19	ENSG00000123454
Kidney	18-19	ENSG00000228300
Kidney	18-19	ENSG00000205060
Kidney	18-19	ENSG00000187145
Kidney	25-28	ENSG00000165801
Kidney	25-28	ENSG00000054598
Kidney	25-28	ENSG00000081853
Kidney	25-28	ENSG00000204956
Kidney	25-28	ENSG00000253159
Kidney	25-28	ENSG00000253305
Kidney	25-28	ENSG00000253485
Kidney	25-28	ENSG00000253537
Kidney	25-28	ENSG00000253731
Kidney	25-28	ENSG00000253767
Kidney	25-28	ENSG00000253846
Kidney	25-28	ENSG00000253910
Kidney	25-28	ENSG00000253953
Kidney	25-28	ENSG00000254122
Kidney	25-28	ENSG00000254221
Kidney	25-28	ENSG00000254245
Kidney	25-28	ENSG00000261934
Kidney	25-28	ENSG00000262209
Kidney	25-28	ENSG00000262576
Kidney	25-28	ENSG00000253873
Kidney	25-28	ENSG00000169418
Kidney	25-28	ENSG00000178184
Kidney	25-28	ENSG00000126822
Kidney	25-28	ENSG00000092096
Kidney	25-28	ENSG00000115073
Kidney	25-28	ENSG00000114315
Kidney	25-28	ENSG00000167291
Kidney	25-28	ENSG00000110321
Kidney	25-28	ENSG00000176595
Kidney	25-28	ENSG00000198914
Kidney	25-28	ENSG00000075891
Kidney	25-28	ENSG00000187634
Kidney	25-28	ENSG00000175879
Kidney	25-28	ENSG00000175745
Kidney	25-28	ENSG00000001617
Kidney	25-28	ENSG00000171551
Kidney	25-28	ENSG00000124171
Kidney	25-28	ENSG00000101104
Kidney	25-28	ENSG00000050555
Kidney	25-28	ENSG00000146038
Kidney	25-28	ENSG00000138439
Kidney	25-28	ENSG00000176692
Kidney	25-28	ENSG00000127951
Kidney	25-28	ENSG00000135638
Kidney	25-28	ENSG00000185085
Kidney	25-28	ENSG00000166589
Kidney	25-28	ENSG00000112394
Kidney	25-28	ENSG00000196781
Kidney	25-28	ENSG00000128709
Kidney	25-28	ENSG00000135631
Kidney	25-28	ENSG00000167925
Kidney	25-28	ENSG00000171298
Kidney	25-28	ENSG00000138777
Kidney	25-28	ENSG00000172005
Kidney	25-28	ENSG00000004455
Kidney	25-28	ENSG00000160951
Kidney	25-28	ENSG00000165832
Kidney	25-28	ENSG00000164825
Kidney	25-28	ENSG00000119771
Kidney	25-28	ENSG00000213901
Kidney	25-28	ENSG00000176387
Kidney	25-28	ENSG00000050628
Kidney	25-28	ENSG00000100767
Kidney	25-28	ENSG00000130402
Kidney	25-28	ENSG00000149418
Kidney	25-28	ENSG00000137819
Kidney	25-28	ENSG00000173898
Kidney	25-28	ENSG00000205336
Kidney	25-28	ENSG00000151136
Kidney	25-28	ENSG00000115112
Kidney	25-28	ENSG00000170927
Kidney	25-28	ENSG00000137393
Kidney	25-28	ENSG00000141441
Kidney	25-28	ENSG00000189337
Kidney	25-28	ENSG00000142871
Kidney	25-28	ENSG00000197930
Kidney	25-28	ENSG00000113108
Kidney	25-28	ENSG00000162552
Kidney	25-28	ENSG00000214944
Kidney	25-28	ENSG00000182224
Kidney	25-28	ENSG00000144283
Kidney	25-28	ENSG00000145536
Kidney	25-28	ENSG00000103460
Kidney	25-28	ENSG00000073350
Kidney	25-28	ENSG00000101346
Kidney	25-28	ENSG00000182957
Kidney	25-28	ENSG00000081913
Kidney	25-28	ENSG00000162105
Kidney	25-28	ENSG00000133316
Kidney	25-28	ENSG00000168000
Kidney	25-28	ENSG00000002726
Kidney	25-28	ENSG00000060656
Kidney	25-28	ENSG00000114993
Kidney	25-28	ENSG00000100033
Kidney	25-28	ENSG00000099999
Kidney	25-28	ENSG00000088854
Kidney	25-28	ENSG00000127585
Kidney	25-28	ENSG00000088899
Kidney	25-28	ENSG00000166886
Kidney	25-28	ENSG00000104805
Kidney	25-28	ENSG00000213020
Kidney	25-28	ENSG00000105270
Kidney	25-28	ENSG00000132970
Kidney	25-28	ENSG00000137077
Kidney	25-28	ENSG00000125266
Kidney	25-28	ENSG00000167191
Kidney	25-28	ENSG00000241404
Kidney	25-28	ENSG00000258388
Liver	13-15	ENSG00000119711
Liver	13-15	ENSG00000064666
Liver	13-15	ENSG00000072274
Liver	13-15	ENSG00000108439
Liver	13-15	ENSG00000162669
Liver	13-15	ENSG00000087884
Liver	13-15	ENSG00000161921
Liver	13-15	ENSG00000084110
Liver	13-15	ENSG00000162063
Liver	13-15	ENSG00000157734
Liver	13-15	ENSG00000242265
Liver	13-15	ENSG00000135744
Liver	13-15	ENSG00000145425
Liver	18-19	ENSG00000099991
Liver	18-19	ENSG00000163785
Liver	18-19	ENSG00000130511
Liver	18-19	ENSG00000124098
Liver	18-19	ENSG00000162692
Liver	18-19	ENSG00000167711
Liver	18-19	ENSG00000099974
Liver	18-19	ENSG00000055957
Liver	18-19	ENSG00000143627
Liver	18-19	ENSG00000145192
Liver	18-19	ENSG00000096968
Liver	18-19	ENSG00000197114
Liver	18-19	ENSG00000203896
Liver	25-28	ENSG00000112936
Liver	25-28	ENSG00000183077
Liver	25-28	ENSG00000124006
Liver	25-28	ENSG00000179588
Liver	25-28	ENSG00000138080
Liver	25-28	ENSG00000118046
Liver	25-28	ENSG00000173442
Liver	25-28	ENSG00000138867
Liver	25-28	ENSG00000241360
Liver	25-28	ENSG00000253368
Liver	25-28	ENSG00000101447
Liver	25-28	ENSG00000101439
Liver	25-28	ENSG00000100304
Liver	25-28	ENSG00000105701
Liver	25-28	ENSG00000171552
Liver	25-28	ENSG00000148229
Liver	25-28	ENSG00000052802
Liver	25-28	ENSG00000159023
Liver	25-28	ENSG00000245848
Liver	25-28	ENSG00000034152
Liver	25-28	ENSG00000173369
Liver	25-28	ENSG00000101057
Liver	25-28	ENSG00000159189
Liver	25-28	ENSG00000161888
Liver	25-28	ENSG00000162367
Liver	25-28	ENSG00000183971
Liver	25-28	ENSG00000169704
Liver	25-28	ENSG00000198732
Liver	25-28	ENSG00000138315
Liver	25-28	ENSG00000064201
Liver	25-28	ENSG00000138756
Liver	25-28	ENSG00000160282
Liver	25-28	ENSG00000128335
Liver	25-28	ENSG00000160712
Liver	25-28	ENSG00000162267
Liver	25-28	ENSG00000164403
Liver	25-28	ENSG00000224916
Liver	25-28	ENSG00000267467
Liver	25-28	ENSG00000176919
Liver	25-28	ENSG00000181192
Liver	25-28	ENSG00000065809
Liver	25-28	ENSG00000196600
Liver	25-28	ENSG00000144908
Liver	25-28	ENSG00000118514
Liver	25-28	ENSG00000096384
Liver	25-28	ENSG00000228278
Lung	13-15	ENSG00000064651
Lung	13-15	ENSG00000176171
Lung	13-15	ENSG00000226174
Lung	13-15	ENSG00000148660
Lung	13-15	ENSG00000118526
Lung	13-15	ENSG00000180190
Lung	13-15	ENSG00000182541
Lung	13-15	ENSG00000166444
Lung	13-15	ENSG00000173376
Lung	13-15	ENSG00000114942
Lung	13-15	ENSG00000103241
Lung	18-19	ENSG00000153187
Lung	18-19	ENSG00000106537
Lung	18-19	ENSG00000170144
Lung	18-19	ENSG00000177600
Lung	18-19	ENSG00000185269
Lung	18-19	ENSG00000078081
Lung	18-19	ENSG00000257921
Lung	18-19	ENSG00000165757
Lung	25-28	ENSG00000124440
Lung	25-28	ENSG00000251322
Lung	25-28	ENSG00000177469
Lung	25-28	ENSG00000049540
Lung	25-28	ENSG00000168610
Lung	25-28	ENSG00000204592
Lung	25-28	ENSG00000153395
Lung	25-28	ENSG00000117298
Lung	25-28	ENSG00000117114
Lung	25-28	ENSG00000135063
Lung	25-28	ENSG00000068650
Lung	25-28	ENSG00000113721
Lung	25-28	ENSG00000167460
Lung	25-28	ENSG00000127603
Lung	25-28	ENSG00000169047
Lung	25-28	ENSG00000135821
Lung	25-28	ENSG00000078140
Lung	25-28	ENSG00000082898
Lung	25-28	ENSG00000160796
Lung	25-28	ENSG00000180573
Lung	25-28	ENSG00000157259
Lung	25-28	ENSG00000077943
Lung	25-28	ENSG00000233608
Lung	25-28	ENSG00000068781
Lung	25-28	ENSG00000243244
Lung	25-28	ENSG00000122566
Lung	25-28	ENSG00000164548
Lung	25-28	ENSG00000160111
Lung	25-28	ENSG00000158270
Lung	25-28	ENSG00000152527
Lung	25-28	ENSG00000100201
Lung	25-28	ENSG00000108239
Lung	25-28	ENSG00000015479
Lung	25-28	ENSG00000182319
Lung	25-28	ENSG00000125798
Lung	25-28	ENSG00000153147
Lung	25-28	ENSG00000006016
Lung	25-28	ENSG00000092758
Lung	25-28	ENSG00000121075
Lung	25-28	ENSG00000168878
Lung	25-28	ENSG00000107623
Lung	25-28	ENSG00000129521
Lung	25-28	ENSG00000091490
Lung	25-28	ENSG00000118849
Lung	25-28	ENSG00000162804
Lung	25-28	ENSG00000168807
Lung	25-28	ENSG00000135272
Lung	25-28	ENSG00000065243
Lung	25-28	ENSG00000122547
Lung	25-28	ENSG00000136153
Lung	25-28	ENSG00000103222
Lung	25-28	ENSG00000160180
Lung	25-28	ENSG00000183287
Lung	25-28	ENSG00000013588
Lung	25-28	ENSG00000104517
Lung	25-28	ENSG00000105193
Lung	25-28	ENSG00000109906
Lung	25-28	ENSG00000134759
Lung	25-28	ENSG00000136040
Lung	25-28	ENSG00000027697
Lung	25-28	ENSG00000079819
Lung	25-28	ENSG00000165389
Lung	25-28	ENSG00000166347
Lung	25-28	ENSG00000196776
Lung	25-28	ENSG00000159433
Lung	25-28	ENSG00000141279
Lung	25-28	ENSG00000205502
Lung	25-28	ENSG00000197467
Lung	25-28	ENSG00000114857
Lung	25-28	ENSG00000127947
Lung	25-28	ENSG00000102854
Lung	25-28	ENSG00000115310
Lung	25-28	ENSG00000105376
Lung	25-28	ENSG00000105856
Lung	25-28	ENSG00000148634
Lung	25-28	ENSG00000196352
Lung	25-28	ENSG00000106948
Lung	25-28	ENSG00000128641
Lung	25-28	ENSG00000182851
Lung	25-28	ENSG00000007545
Lung	25-28	ENSG00000261732
Lung	25-28	ENSG00000165949
Lung	25-28	ENSG00000130598
Lung	25-28	ENSG00000105835
Lung	25-28	ENSG00000114812
Lung	25-28	ENSG00000204642
Lung	25-28	ENSG00000126870
Lung	25-28	ENSG00000140577
Lung	25-28	ENSG00000145147
Lung	25-28	ENSG00000132485
Lung	25-28	ENSG00000173638
Lung	25-28	ENSG00000115464
Lung	25-28	ENSG00000166750
Lung	25-28	ENSG00000100027
Lung	25-28	ENSG00000148344
Lung	25-28	ENSG00000091073
Lung	25-28	ENSG00000171303
Lung	25-28	ENSG00000179409
Lung	25-28	ENSG00000176771
Lung	25-28	ENSG00000183889
Lung	25-28	ENSG00000104879
Lung	25-28	ENSG00000122378
Lung	25-28	ENSG00000100345
Lung	25-28	ENSG00000140943
Lung	25-28	ENSG00000114353
Lung	25-28	ENSG00000124201
Lung	25-28	ENSG00000168394
Lung	25-28	ENSG00000165494
Lung	25-28	ENSG00000197766
Lung	25-28	ENSG00000160294
Lung	25-28	ENSG00000182795

## Sheet: Supplementary Table 7
Supplementary Table 7. Gene list of different coordinate regulation groups.
Differentially expressed Organ-specific genes groups were DNA 5hmC and RNA m5C specifically regulated genes (group A), genes that were only specifically regulated by DNA 5hmC (group B), genes that were only specifically regulated by RNA m5C (group A).
Tissue-specific	Group	Gene ID
Heart	GroupA	ENSG00000124831
Heart	GroupA	ENSG00000105341
Heart	GroupA	ENSG00000114850
Heart	GroupA	ENSG00000166313
Heart	GroupA	ENSG00000156162
Heart	GroupA	ENSG00000109193
Heart	GroupA	ENSG00000144749
Heart	GroupA	ENSG00000049323
Heart	GroupA	ENSG00000112531
Heart	GroupA	ENSG00000129991
Heart	GroupA	ENSG00000182606
Heart	GroupA	ENSG00000020577
Heart	GroupA	ENSG00000011105
Heart	GroupA	ENSG00000077009
Heart	GroupA	ENSG00000101210
Heart	GroupA	ENSG00000128274
Heart	GroupA	ENSG00000092054
Heart	GroupA	ENSG00000166689
Heart	GroupA	ENSG00000111245
Heart	GroupA	ENSG00000157510
Heart	GroupA	ENSG00000139044
Heart	GroupA	ENSG00000140795
Heart	GroupA	ENSG00000173641
Heart	GroupA	ENSG00000174233
Heart	GroupA	ENSG00000149596
Heart	GroupA	ENSG00000134571
Heart	GroupA	ENSG00000151640
Heart	GroupA	ENSG00000113430
Heart	GroupA	ENSG00000167549
Heart	GroupA	ENSG00000175206
Heart	GroupA	ENSG00000133065
Heart	GroupA	ENSG00000173281
Heart	GroupA	ENSG00000185739
Heart	GroupA	ENSG00000182963
Heart	GroupA	ENSG00000137094
Heart	GroupA	ENSG00000205560
Heart	GroupA	ENSG00000151067
Heart	GroupA	ENSG00000154556
Heart	GroupA	ENSG00000166833
Heart	GroupA	ENSG00000126882
Heart	GroupA	ENSG00000100302
Heart	GroupA	ENSG00000023902
Heart	GroupA	ENSG00000183654
Heart	GroupA	ENSG00000134369
Heart	GroupA	ENSG00000174437
Heart	GroupA	ENSG00000112276
Heart	GroupA	ENSG00000114923
Heart	GroupA	ENSG00000136383
Heart	GroupA	ENSG00000072195
Heart	GroupA	ENSG00000104332
Heart	GroupA	ENSG00000102996
Heart	GroupA	ENSG00000169018
Heart	GroupA	ENSG00000010282
Heart	GroupA	ENSG00000133454
Heart	GroupA	ENSG00000170801
Heart	GroupA	ENSG00000036672
Heart	GroupA	ENSG00000141385
Heart	GroupA	ENSG00000113196
Heart	GroupA	ENSG00000048028
Heart	GroupA	ENSG00000100994
Heart	GroupA	ENSG00000023228
Heart	GroupA	ENSG00000077522
Heart	GroupA	ENSG00000131981
Kidney	GroupA	ENSG00000050555
Kidney	GroupA	ENSG00000182272
Kidney	GroupA	ENSG00000110697
Kidney	GroupA	ENSG00000146038
Kidney	GroupA	ENSG00000262359
Kidney	GroupA	ENSG00000108511
Kidney	GroupA	ENSG00000088882
Kidney	GroupA	ENSG00000260027
Kidney	GroupA	ENSG00000128713
Kidney	GroupA	ENSG00000004455
Kidney	GroupA	ENSG00000161270
Kidney	GroupA	ENSG00000196781
Kidney	GroupA	ENSG00000134504
Liver	GroupA	ENSG00000182551
Liver	GroupA	ENSG00000175745
Liver	GroupA	ENSG00000148248
Liver	GroupA	ENSG00000110921
Liver	GroupA	ENSG00000165140
Liver	GroupA	ENSG00000132688
Liver	GroupA	ENSG00000063854
Liver	GroupA	ENSG00000131979
Liver	GroupA	ENSG00000141485
Liver	GroupA	ENSG00000182600
Liver	GroupA	ENSG00000106327
Liver	GroupA	ENSG00000162063
Liver	GroupA	ENSG00000121440
Liver	GroupA	ENSG00000135045
Liver	GroupA	ENSG00000172482
Liver	GroupA	ENSG00000243649
Liver	GroupA	ENSG00000224916
Liver	GroupA	ENSG00000064201
Liver	GroupA	ENSG00000151224
Liver	GroupA	ENSG00000161921
Liver	GroupA	ENSG00000099194
Liver	GroupA	ENSG00000130508
Liver	GroupA	ENSG00000084674
Liver	GroupA	ENSG00000004939
Liver	GroupA	ENSG00000198650
Liver	GroupA	ENSG00000055957
Liver	GroupA	ENSG00000084110
Liver	GroupA	ENSG00000100304
Liver	GroupA	ENSG00000131187
Liver	GroupA	ENSG00000143627
Liver	GroupA	ENSG00000084070
Liver	GroupA	ENSG00000121410
Liver	GroupA	ENSG00000060566
Liver	GroupA	ENSG00000185928
Liver	GroupA	ENSG00000072274
Liver	GroupA	ENSG00000125166
Liver	GroupA	ENSG00000152620
Liver	GroupA	ENSG00000162367
Liver	GroupA	ENSG00000106927
Liver	GroupA	ENSG00000138756
Liver	GroupA	ENSG00000145192
Liver	GroupA	ENSG00000196177
Liver	GroupA	ENSG00000197249
Liver	GroupA	ENSG00000107537
Liver	GroupA	ENSG00000204128
Liver	GroupA	ENSG00000166126
Liver	GroupA	ENSG00000135776
Liver	GroupA	ENSG00000052802
Liver	GroupA	ENSG00000105610
Lung	GroupA	ENSG00000106537
Lung	GroupA	ENSG00000159714
Lung	GroupA	ENSG00000182551
Lung	GroupA	ENSG00000173376
Lung	GroupA	ENSG00000105989
Lung	GroupA	ENSG00000170561
Lung	GroupA	ENSG00000168878
Lung	GroupA	ENSG00000122852
Lung	GroupA	ENSG00000182319
Lung	GroupA	ENSG00000153395
Lung	GroupA	ENSG00000206538
Lung	GroupA	ENSG00000061455
Heart	GroupB	ENSG00000232081
Heart	GroupB	ENSG00000144476
Heart	GroupB	ENSG00000169902
Heart	GroupB	ENSG00000255772
Heart	GroupB	ENSG00000251963
Heart	GroupB	ENSG00000035403
Heart	GroupB	ENSG00000162614
Heart	GroupB	ENSG00000225656
Heart	GroupB	ENSG00000212418
Heart	GroupB	ENSG00000230126
Heart	GroupB	ENSG00000163694
Heart	GroupB	ENSG00000237324
Heart	GroupB	ENSG00000226709
Heart	GroupB	ENSG00000176273
Heart	GroupB	ENSG00000248994
Heart	GroupB	ENSG00000174032
Heart	GroupB	ENSG00000261635
Heart	GroupB	ENSG00000164124
Heart	GroupB	ENSG00000130037
Heart	GroupB	ENSG00000238902
Heart	GroupB	ENSG00000143324
Heart	GroupB	ENSG00000143140
Heart	GroupB	ENSG00000249114
Heart	GroupB	ENSG00000136859
Heart	GroupB	ENSG00000214297
Heart	GroupB	ENSG00000266012
Heart	GroupB	ENSG00000256552
Heart	GroupB	ENSG00000197586
Heart	GroupB	ENSG00000156471
Heart	GroupB	ENSG00000152234
Heart	GroupB	ENSG00000149573
Heart	GroupB	ENSG00000140563
Heart	GroupB	ENSG00000076706
Heart	GroupB	ENSG00000167657
Heart	GroupB	ENSG00000110955
Heart	GroupB	ENSG00000199364
Heart	GroupB	ENSG00000182648
Heart	GroupB	ENSG00000261315
Heart	GroupB	ENSG00000123358
Heart	GroupB	ENSG00000115363
Heart	GroupB	ENSG00000124882
Heart	GroupB	ENSG00000141198
Heart	GroupB	ENSG00000103876
Heart	GroupB	ENSG00000216077
Heart	GroupB	ENSG00000125812
Heart	GroupB	ENSG00000253313
Heart	GroupB	ENSG00000240024
Heart	GroupB	ENSG00000180712
Heart	GroupB	ENSG00000197763
Heart	GroupB	ENSG00000216035
Heart	GroupB	ENSG00000259727
Heart	GroupB	ENSG00000198911
Heart	GroupB	ENSG00000230226
Heart	GroupB	ENSG00000261340
Heart	GroupB	ENSG00000160293
Heart	GroupB	ENSG00000270761
Heart	GroupB	ENSG00000005020
Heart	GroupB	ENSG00000189043
Heart	GroupB	ENSG00000233110
Heart	GroupB	ENSG00000173705
Heart	GroupB	ENSG00000080200
Heart	GroupB	ENSG00000184185
Heart	GroupB	ENSG00000221760
Heart	GroupB	ENSG00000149633
Heart	GroupB	ENSG00000109189
Heart	GroupB	ENSG00000180190
Heart	GroupB	ENSG00000219438
Heart	GroupB	ENSG00000234352
Heart	GroupB	ENSG00000241666
Heart	GroupB	ENSG00000108679
Heart	GroupB	ENSG00000075239
Heart	GroupB	ENSG00000243840
Heart	GroupB	ENSG00000112343
Heart	GroupB	ENSG00000263435
Heart	GroupB	ENSG00000170485
Heart	GroupB	ENSG00000247572
Heart	GroupB	ENSG00000166153
Heart	GroupB	ENSG00000085662
Heart	GroupB	ENSG00000157927
Heart	GroupB	ENSG00000136045
Heart	GroupB	ENSG00000265722
Heart	GroupB	ENSG00000182255
Heart	GroupB	ENSG00000187097
Heart	GroupB	ENSG00000134452
Heart	GroupB	ENSG00000200556
Heart	GroupB	ENSG00000257594
Heart	GroupB	ENSG00000259630
Heart	GroupB	ENSG00000262943
Heart	GroupB	ENSG00000213480
Heart	GroupB	ENSG00000180834
Heart	GroupB	ENSG00000237187
Heart	GroupB	ENSG00000227274
Heart	GroupB	ENSG00000144227
Heart	GroupB	ENSG00000201291
Heart	GroupB	ENSG00000102531
Heart	GroupB	ENSG00000123427
Heart	GroupB	ENSG00000233334
Heart	GroupB	ENSG00000183421
Heart	GroupB	ENSG00000105991
Heart	GroupB	ENSG00000235050
Heart	GroupB	ENSG00000013016
Heart	GroupB	ENSG00000196118
Heart	GroupB	ENSG00000114956
Heart	GroupB	ENSG00000159063
Heart	GroupB	ENSG00000228509
Heart	GroupB	ENSG00000105997
Heart	GroupB	ENSG00000068078
Heart	GroupB	ENSG00000112667
Heart	GroupB	ENSG00000125257
Heart	GroupB	ENSG00000080709
Heart	GroupB	ENSG00000206852
Heart	GroupB	ENSG00000270055
Heart	GroupB	ENSG00000226409
Heart	GroupB	ENSG00000232626
Heart	GroupB	ENSG00000099337
Heart	GroupB	ENSG00000205913
Heart	GroupB	ENSG00000165140
Heart	GroupB	ENSG00000228016
Heart	GroupB	ENSG00000237586
Heart	GroupB	ENSG00000204564
Heart	GroupB	ENSG00000149634
Heart	GroupB	ENSG00000238273
Heart	GroupB	ENSG00000266413
Heart	GroupB	ENSG00000244018
Heart	GroupB	ENSG00000238545
Heart	GroupB	ENSG00000261616
Heart	GroupB	ENSG00000058091
Heart	GroupB	ENSG00000154269
Heart	GroupB	ENSG00000136560
Heart	GroupB	ENSG00000154252
Heart	GroupB	ENSG00000248049
Heart	GroupB	ENSG00000107371
Heart	GroupB	ENSG00000231754
Heart	GroupB	ENSG00000100626
Heart	GroupB	ENSG00000235902
Heart	GroupB	ENSG00000230795
Heart	GroupB	ENSG00000269991
Heart	GroupB	ENSG00000052795
Heart	GroupB	ENSG00000258851
Heart	GroupB	ENSG00000207460
Heart	GroupB	ENSG00000259498
Heart	GroupB	ENSG00000228213
Heart	GroupB	ENSG00000213145
Heart	GroupB	ENSG00000113615
Heart	GroupB	ENSG00000103460
Heart	GroupB	ENSG00000115884
Heart	GroupB	ENSG00000231933
Heart	GroupB	ENSG00000137960
Heart	GroupB	ENSG00000237399
Heart	GroupB	ENSG00000163754
Heart	GroupB	ENSG00000229206
Heart	GroupB	ENSG00000176697
Heart	GroupB	ENSG00000269190
Heart	GroupB	ENSG00000242349
Heart	GroupB	ENSG00000108242
Heart	GroupB	ENSG00000255545
Heart	GroupB	ENSG00000259716
Heart	GroupB	ENSG00000145861
Heart	GroupB	ENSG00000267196
Heart	GroupB	ENSG00000112290
Heart	GroupB	ENSG00000260492
Heart	GroupB	ENSG00000166801
Heart	GroupB	ENSG00000263812
Heart	GroupB	ENSG00000066185
Heart	GroupB	ENSG00000196139
Heart	GroupB	ENSG00000221148
Heart	GroupB	ENSG00000234775
Heart	GroupB	ENSG00000135063
Heart	GroupB	ENSG00000226441
Heart	GroupB	ENSG00000109265
Heart	GroupB	ENSG00000176882
Heart	GroupB	ENSG00000267784
Heart	GroupB	ENSG00000200281
Heart	GroupB	ENSG00000228174
Heart	GroupB	ENSG00000260415
Heart	GroupB	ENSG00000264490
Heart	GroupB	ENSG00000103187
Heart	GroupB	ENSG00000186715
Heart	GroupB	ENSG00000185290
Heart	GroupB	ENSG00000166173
Heart	GroupB	ENSG00000227726
Heart	GroupB	ENSG00000135917
Heart	GroupB	ENSG00000111802
Heart	GroupB	ENSG00000145569
Heart	GroupB	ENSG00000172292
Heart	GroupB	ENSG00000184983
Heart	GroupB	ENSG00000202398
Heart	GroupB	ENSG00000082497
Heart	GroupB	ENSG00000261589
Heart	GroupB	ENSG00000199291
Heart	GroupB	ENSG00000249184
Heart	GroupB	ENSG00000267414
Heart	GroupB	ENSG00000253523
Heart	GroupB	ENSG00000165752
Heart	GroupB	ENSG00000106809
Heart	GroupB	ENSG00000155189
Heart	GroupB	ENSG00000235445
Heart	GroupB	ENSG00000149346
Heart	GroupB	ENSG00000128609
Heart	GroupB	ENSG00000256025
Heart	GroupB	ENSG00000268926
Heart	GroupB	ENSG00000204472
Heart	GroupB	ENSG00000124171
Heart	GroupB	ENSG00000162817
Heart	GroupB	ENSG00000263155
Heart	GroupB	ENSG00000197747
Heart	GroupB	ENSG00000183785
Heart	GroupB	ENSG00000200681
Heart	GroupB	ENSG00000124678
Heart	GroupB	ENSG00000162621
Heart	GroupB	ENSG00000162882
Heart	GroupB	ENSG00000235560
Heart	GroupB	ENSG00000268898
Heart	GroupB	ENSG00000269392
Heart	GroupB	ENSG00000270574
Heart	GroupB	ENSG00000106628
Heart	GroupB	ENSG00000268603
Heart	GroupB	ENSG00000096092
Heart	GroupB	ENSG00000225299
Heart	GroupB	ENSG00000105135
Heart	GroupB	ENSG00000253797
Heart	GroupB	ENSG00000256937
Heart	GroupB	ENSG00000237298
Heart	GroupB	ENSG00000232656
Heart	GroupB	ENSG00000232439
Heart	GroupB	ENSG00000254290
Heart	GroupB	ENSG00000202141
Heart	GroupB	ENSG00000200184
Heart	GroupB	ENSG00000231628
Heart	GroupB	ENSG00000085832
Heart	GroupB	ENSG00000135697
Heart	GroupB	ENSG00000214114
Heart	GroupB	ENSG00000206805
Heart	GroupB	ENSG00000088386
Heart	GroupB	ENSG00000101407
Heart	GroupB	ENSG00000264201
Heart	GroupB	ENSG00000257653
Heart	GroupB	ENSG00000241388
Heart	GroupB	ENSG00000252078
Heart	GroupB	ENSG00000136925
Heart	GroupB	ENSG00000123545
Heart	GroupB	ENSG00000162413
Heart	GroupB	ENSG00000248092
Heart	GroupB	ENSG00000053108
Heart	GroupB	ENSG00000261235
Heart	GroupB	ENSG00000227107
Heart	GroupB	ENSG00000252518
Heart	GroupB	ENSG00000108753
Heart	GroupB	ENSG00000164530
Heart	GroupB	ENSG00000154930
Heart	GroupB	ENSG00000114999
Heart	GroupB	ENSG00000253683
Heart	GroupB	ENSG00000257150
Heart	GroupB	ENSG00000230442
Heart	GroupB	ENSG00000118194
Heart	GroupB	ENSG00000067057
Heart	GroupB	ENSG00000133424
Heart	GroupB	ENSG00000078328
Heart	GroupB	ENSG00000248986
Heart	GroupB	ENSG00000196850
Heart	GroupB	ENSG00000176490
Heart	GroupB	ENSG00000133401
Heart	GroupB	ENSG00000105409
Heart	GroupB	ENSG00000136842
Heart	GroupB	ENSG00000162444
Heart	GroupB	ENSG00000241135
Heart	GroupB	ENSG00000198125
Heart	GroupB	ENSG00000204655
Heart	GroupB	ENSG00000265356
Heart	GroupB	ENSG00000100412
Heart	GroupB	ENSG00000154822
Heart	GroupB	ENSG00000122477
Heart	GroupB	ENSG00000180509
Heart	GroupB	ENSG00000267405
Heart	GroupB	ENSG00000116991
Heart	GroupB	ENSG00000163380
Heart	GroupB	ENSG00000266221
Heart	GroupB	ENSG00000267365
Heart	GroupB	ENSG00000057294
Heart	GroupB	ENSG00000138448
Heart	GroupB	ENSG00000268518
Heart	GroupB	ENSG00000182836
Heart	GroupB	ENSG00000064012
Heart	GroupB	ENSG00000134775
Heart	GroupB	ENSG00000164949
Heart	GroupB	ENSG00000203645
Heart	GroupB	ENSG00000112992
Heart	GroupB	ENSG00000154153
Heart	GroupB	ENSG00000058056
Heart	GroupB	ENSG00000185105
Heart	GroupB	ENSG00000126267
Heart	GroupB	ENSG00000215991
Heart	GroupB	ENSG00000186073
Heart	GroupB	ENSG00000256257
Heart	GroupB	ENSG00000120937
Heart	GroupB	ENSG00000109107
Heart	GroupB	ENSG00000112773
Heart	GroupB	ENSG00000234841
Heart	GroupB	ENSG00000109099
Heart	GroupB	ENSG00000252396
Heart	GroupB	ENSG00000155380
Heart	GroupB	ENSG00000234438
Heart	GroupB	ENSG00000230778
Heart	GroupB	ENSG00000216639
Heart	GroupB	ENSG00000172159
Heart	GroupB	ENSG00000080854
Heart	GroupB	ENSG00000163171
Heart	GroupB	ENSG00000198797
Heart	GroupB	ENSG00000256837
Heart	GroupB	ENSG00000252000
Heart	GroupB	ENSG00000175946
Heart	GroupB	ENSG00000260604
Heart	GroupB	ENSG00000115602
Heart	GroupB	ENSG00000156804
Heart	GroupB	ENSG00000100592
Heart	GroupB	ENSG00000012232
Heart	GroupB	ENSG00000261434
Heart	GroupB	ENSG00000121577
Heart	GroupB	ENSG00000110080
Heart	GroupB	ENSG00000263723
Heart	GroupB	ENSG00000221033
Heart	GroupB	ENSG00000104369
Heart	GroupB	ENSG00000250392
Heart	GroupB	ENSG00000254002
Heart	GroupB	ENSG00000236208
Heart	GroupB	ENSG00000221818
Heart	GroupB	ENSG00000235160
Heart	GroupB	ENSG00000173175
Heart	GroupB	ENSG00000163793
Heart	GroupB	ENSG00000136235
Heart	GroupB	ENSG00000256721
Heart	GroupB	ENSG00000008853
Heart	GroupB	ENSG00000174403
Heart	GroupB	ENSG00000100628
Heart	GroupB	ENSG00000203593
Heart	GroupB	ENSG00000146926
Heart	GroupB	ENSG00000205683
Heart	GroupB	ENSG00000130176
Heart	GroupB	ENSG00000205678
Heart	GroupB	ENSG00000084090
Heart	GroupB	ENSG00000226306
Heart	GroupB	ENSG00000164649
Heart	GroupB	ENSG00000138829
Heart	GroupB	ENSG00000251399
Heart	GroupB	ENSG00000198626
Heart	GroupB	ENSG00000124743
Heart	GroupB	ENSG00000108576
Heart	GroupB	ENSG00000254510
Heart	GroupB	ENSG00000169255
Heart	GroupB	ENSG00000135424
Heart	GroupB	ENSG00000270112
Heart	GroupB	ENSG00000119922
Heart	GroupB	ENSG00000267577
Heart	GroupB	ENSG00000103034
Heart	GroupB	ENSG00000135074
Heart	GroupB	ENSG00000076555
Heart	GroupB	ENSG00000138675
Heart	GroupB	ENSG00000234229
Heart	GroupB	ENSG00000132938
Heart	GroupB	ENSG00000233930
Heart	GroupB	ENSG00000153820
Heart	GroupB	ENSG00000079215
Heart	GroupB	ENSG00000109846
Heart	GroupB	ENSG00000180611
Heart	GroupB	ENSG00000140545
Heart	GroupB	ENSG00000252222
Heart	GroupB	ENSG00000226063
Heart	GroupB	ENSG00000103994
Heart	GroupB	ENSG00000232056
Heart	GroupB	ENSG00000223855
Heart	GroupB	ENSG00000168675
Heart	GroupB	ENSG00000113739
Heart	GroupB	ENSG00000174502
Heart	GroupB	ENSG00000154122
Heart	GroupB	ENSG00000184545
Heart	GroupB	ENSG00000132429
Heart	GroupB	ENSG00000203740
Heart	GroupB	ENSG00000189212
Heart	GroupB	ENSG00000177150
Heart	GroupB	ENSG00000185847
Heart	GroupB	ENSG00000207497
Heart	GroupB	ENSG00000080371
Heart	GroupB	ENSG00000163683
Heart	GroupB	ENSG00000164125
Heart	GroupB	ENSG00000267744
Heart	GroupB	ENSG00000234323
Heart	GroupB	ENSG00000159173
Heart	GroupB	ENSG00000163492
Heart	GroupB	ENSG00000248624
Heart	GroupB	ENSG00000253389
Heart	GroupB	ENSG00000233894
Heart	GroupB	ENSG00000129170
Heart	GroupB	ENSG00000176014
Heart	GroupB	ENSG00000152128
Heart	GroupB	ENSG00000078814
Heart	GroupB	ENSG00000269494
Heart	GroupB	ENSG00000115641
Heart	GroupB	ENSG00000227729
Heart	GroupB	ENSG00000104879
Heart	GroupB	ENSG00000171877
Heart	GroupB	ENSG00000134762
Heart	GroupB	ENSG00000158435
Heart	GroupB	ENSG00000157119
Heart	GroupB	ENSG00000165996
Heart	GroupB	ENSG00000141052
Heart	GroupB	ENSG00000107242
Heart	GroupB	ENSG00000253348
Heart	GroupB	ENSG00000231329
Heart	GroupB	ENSG00000267557
Heart	GroupB	ENSG00000138162
Heart	GroupB	ENSG00000244214
Heart	GroupB	ENSG00000109158
Heart	GroupB	ENSG00000249286
Heart	GroupB	ENSG00000228973
Heart	GroupB	ENSG00000107263
Heart	GroupB	ENSG00000132329
Heart	GroupB	ENSG00000170153
Heart	GroupB	ENSG00000235121
Heart	GroupB	ENSG00000170558
Heart	GroupB	ENSG00000118729
Heart	GroupB	ENSG00000130528
Heart	GroupB	ENSG00000121057
Heart	GroupB	ENSG00000134313
Heart	GroupB	ENSG00000235296
Heart	GroupB	ENSG00000255394
Heart	GroupB	ENSG00000183023
Heart	GroupB	ENSG00000164532
Heart	GroupB	ENSG00000186615
Heart	GroupB	ENSG00000121671
Heart	GroupB	ENSG00000182263
Heart	GroupB	ENSG00000171385
Heart	GroupB	ENSG00000207764
Heart	GroupB	ENSG00000263372
Heart	GroupB	ENSG00000170390
Heart	GroupB	ENSG00000156011
Heart	GroupB	ENSG00000073711
Heart	GroupB	ENSG00000146147
Heart	GroupB	ENSG00000228169
Heart	GroupB	ENSG00000226571
Heart	GroupB	ENSG00000263813
Heart	GroupB	ENSG00000150401
Heart	GroupB	ENSG00000179388
Heart	GroupB	ENSG00000158022
Heart	GroupB	ENSG00000182533
Heart	GroupB	ENSG00000196932
Heart	GroupB	ENSG00000187098
Heart	GroupB	ENSG00000265768
Heart	GroupB	ENSG00000254453
Heart	GroupB	ENSG00000226900
Heart	GroupB	ENSG00000271051
Heart	GroupB	ENSG00000207597
Heart	GroupB	ENSG00000171033
Heart	GroupB	ENSG00000153132
Heart	GroupB	ENSG00000253509
Heart	GroupB	ENSG00000119729
Heart	GroupB	ENSG00000119599
Heart	GroupB	ENSG00000198523
Heart	GroupB	ENSG00000248508
Heart	GroupB	ENSG00000155657
Heart	GroupB	ENSG00000241002
Heart	GroupB	ENSG00000242052
Heart	GroupB	ENSG00000151929
Heart	GroupB	ENSG00000259370
Heart	GroupB	ENSG00000152413
Heart	GroupB	ENSG00000106633
Heart	GroupB	ENSG00000178776
Heart	GroupB	ENSG00000165912
Heart	GroupB	ENSG00000226094
Heart	GroupB	ENSG00000248429
Heart	GroupB	ENSG00000133619
Kidney	GroupB	ENSG00000250971
Kidney	GroupB	ENSG00000104140
Kidney	GroupB	ENSG00000173065
Kidney	GroupB	ENSG00000091879
Kidney	GroupB	ENSG00000107831
Kidney	GroupB	ENSG00000227292
Kidney	GroupB	ENSG00000239007
Kidney	GroupB	ENSG00000176244
Kidney	GroupB	ENSG00000255319
Kidney	GroupB	ENSG00000263004
Kidney	GroupB	ENSG00000168502
Kidney	GroupB	ENSG00000210741
Kidney	GroupB	ENSG00000261602
Kidney	GroupB	ENSG00000260944
Kidney	GroupB	ENSG00000267824
Kidney	GroupB	ENSG00000106004
Kidney	GroupB	ENSG00000119522
Kidney	GroupB	ENSG00000131409
Kidney	GroupB	ENSG00000261840
Kidney	GroupB	ENSG00000251652
Kidney	GroupB	ENSG00000206562
Kidney	GroupB	ENSG00000214719
Kidney	GroupB	ENSG00000211855
Kidney	GroupB	ENSG00000250420
Kidney	GroupB	ENSG00000244044
Kidney	GroupB	ENSG00000092421
Kidney	GroupB	ENSG00000229657
Kidney	GroupB	ENSG00000164037
Kidney	GroupB	ENSG00000165215
Kidney	GroupB	ENSG00000225138
Kidney	GroupB	ENSG00000237404
Kidney	GroupB	ENSG00000240311
Kidney	GroupB	ENSG00000197301
Kidney	GroupB	ENSG00000266927
Kidney	GroupB	ENSG00000233609
Kidney	GroupB	ENSG00000166407
Kidney	GroupB	ENSG00000256008
Kidney	GroupB	ENSG00000126778
Kidney	GroupB	ENSG00000259432
Kidney	GroupB	ENSG00000158815
Kidney	GroupB	ENSG00000182022
Kidney	GroupB	ENSG00000196932
Kidney	GroupB	ENSG00000233633
Kidney	GroupB	ENSG00000234952
Kidney	GroupB	ENSG00000266368
Kidney	GroupB	ENSG00000087191
Kidney	GroupB	ENSG00000267423
Kidney	GroupB	ENSG00000125650
Kidney	GroupB	ENSG00000135821
Kidney	GroupB	ENSG00000182742
Kidney	GroupB	ENSG00000204140
Kidney	GroupB	ENSG00000119650
Kidney	GroupB	ENSG00000268885
Kidney	GroupB	ENSG00000116198
Kidney	GroupB	ENSG00000187621
Kidney	GroupB	ENSG00000100253
Kidney	GroupB	ENSG00000233878
Kidney	GroupB	ENSG00000207607
Kidney	GroupB	ENSG00000223963
Kidney	GroupB	ENSG00000185641
Kidney	GroupB	ENSG00000233760
Kidney	GroupB	ENSG00000266687
Kidney	GroupB	ENSG00000255108
Kidney	GroupB	ENSG00000235621
Kidney	GroupB	ENSG00000226180
Kidney	GroupB	ENSG00000260211
Kidney	GroupB	ENSG00000175899
Kidney	GroupB	ENSG00000125207
Kidney	GroupB	ENSG00000178828
Kidney	GroupB	ENSG00000106266
Kidney	GroupB	ENSG00000267251
Kidney	GroupB	ENSG00000237410
Kidney	GroupB	ENSG00000172935
Kidney	GroupB	ENSG00000253377
Kidney	GroupB	ENSG00000258856
Kidney	GroupB	ENSG00000169252
Kidney	GroupB	ENSG00000135100
Kidney	GroupB	ENSG00000257083
Kidney	GroupB	ENSG00000266962
Kidney	GroupB	ENSG00000254839
Kidney	GroupB	ENSG00000088836
Kidney	GroupB	ENSG00000197149
Kidney	GroupB	ENSG00000174600
Kidney	GroupB	ENSG00000270143
Kidney	GroupB	ENSG00000230852
Kidney	GroupB	ENSG00000161681
Kidney	GroupB	ENSG00000232526
Kidney	GroupB	ENSG00000270182
Kidney	GroupB	ENSG00000223783
Kidney	GroupB	ENSG00000260655
Kidney	GroupB	ENSG00000232024
Kidney	GroupB	ENSG00000142235
Kidney	GroupB	ENSG00000252591
Kidney	GroupB	ENSG00000233644
Kidney	GroupB	ENSG00000105996
Kidney	GroupB	ENSG00000260224
Kidney	GroupB	ENSG00000214970
Kidney	GroupB	ENSG00000269923
Kidney	GroupB	ENSG00000186530
Kidney	GroupB	ENSG00000164761
Kidney	GroupB	ENSG00000148843
Kidney	GroupB	ENSG00000215549
Kidney	GroupB	ENSG00000163155
Kidney	GroupB	ENSG00000228451
Kidney	GroupB	ENSG00000233311
Kidney	GroupB	ENSG00000215022
Kidney	GroupB	ENSG00000227268
Kidney	GroupB	ENSG00000251536
Kidney	GroupB	ENSG00000253400
Kidney	GroupB	ENSG00000262712
Kidney	GroupB	ENSG00000259070
Kidney	GroupB	ENSG00000166006
Kidney	GroupB	ENSG00000122359
Kidney	GroupB	ENSG00000270028
Kidney	GroupB	ENSG00000197497
Kidney	GroupB	ENSG00000159346
Kidney	GroupB	ENSG00000235831
Kidney	GroupB	ENSG00000271659
Kidney	GroupB	ENSG00000066777
Kidney	GroupB	ENSG00000264475
Kidney	GroupB	ENSG00000243746
Kidney	GroupB	ENSG00000143545
Kidney	GroupB	ENSG00000258534
Kidney	GroupB	ENSG00000224417
Kidney	GroupB	ENSG00000159387
Kidney	GroupB	ENSG00000261705
Kidney	GroupB	ENSG00000182255
Kidney	GroupB	ENSG00000258591
Kidney	GroupB	ENSG00000221181
Kidney	GroupB	ENSG00000245748
Kidney	GroupB	ENSG00000197576
Kidney	GroupB	ENSG00000107242
Kidney	GroupB	ENSG00000133275
Kidney	GroupB	ENSG00000203900
Kidney	GroupB	ENSG00000260054
Kidney	GroupB	ENSG00000262728
Kidney	GroupB	ENSG00000104892
Kidney	GroupB	ENSG00000154096
Kidney	GroupB	ENSG00000269896
Kidney	GroupB	ENSG00000256085
Kidney	GroupB	ENSG00000211856
Kidney	GroupB	ENSG00000105851
Kidney	GroupB	ENSG00000207306
Kidney	GroupB	ENSG00000100593
Kidney	GroupB	ENSG00000253954
Kidney	GroupB	ENSG00000121594
Kidney	GroupB	ENSG00000227209
Kidney	GroupB	ENSG00000255545
Kidney	GroupB	ENSG00000168246
Kidney	GroupB	ENSG00000228521
Kidney	GroupB	ENSG00000162009
Kidney	GroupB	ENSG00000213076
Kidney	GroupB	ENSG00000249743
Kidney	GroupB	ENSG00000264395
Kidney	GroupB	ENSG00000223741
Kidney	GroupB	ENSG00000198542
Kidney	GroupB	ENSG00000213023
Kidney	GroupB	ENSG00000187867
Kidney	GroupB	ENSG00000070444
Kidney	GroupB	ENSG00000089225
Kidney	GroupB	ENSG00000105695
Kidney	GroupB	ENSG00000160886
Kidney	GroupB	ENSG00000230922
Kidney	GroupB	ENSG00000167741
Kidney	GroupB	ENSG00000179913
Kidney	GroupB	ENSG00000166405
Kidney	GroupB	ENSG00000007062
Kidney	GroupB	ENSG00000056487
Kidney	GroupB	ENSG00000078725
Kidney	GroupB	ENSG00000250451
Kidney	GroupB	ENSG00000132854
Kidney	GroupB	ENSG00000117280
Kidney	GroupB	ENSG00000188064
Kidney	GroupB	ENSG00000135503
Kidney	GroupB	ENSG00000129187
Kidney	GroupB	ENSG00000256725
Kidney	GroupB	ENSG00000237380
Kidney	GroupB	ENSG00000161277
Kidney	GroupB	ENSG00000233237
Kidney	GroupB	ENSG00000245975
Kidney	GroupB	ENSG00000135253
Kidney	GroupB	ENSG00000214381
Kidney	GroupB	ENSG00000137203
Kidney	GroupB	ENSG00000234177
Kidney	GroupB	ENSG00000259134
Kidney	GroupB	ENSG00000267045
Kidney	GroupB	ENSG00000179242
Kidney	GroupB	ENSG00000015413
Kidney	GroupB	ENSG00000158457
Kidney	GroupB	ENSG00000110076
Kidney	GroupB	ENSG00000170689
Kidney	GroupB	ENSG00000130226
Kidney	GroupB	ENSG00000271547
Kidney	GroupB	ENSG00000177455
Kidney	GroupB	ENSG00000109956
Kidney	GroupB	ENSG00000204252
Kidney	GroupB	ENSG00000261812
Kidney	GroupB	ENSG00000165868
Kidney	GroupB	ENSG00000160223
Kidney	GroupB	ENSG00000079931
Kidney	GroupB	ENSG00000120093
Kidney	GroupB	ENSG00000176769
Kidney	GroupB	ENSG00000227755
Kidney	GroupB	ENSG00000132746
Kidney	GroupB	ENSG00000086570
Kidney	GroupB	ENSG00000250579
Kidney	GroupB	ENSG00000180530
Kidney	GroupB	ENSG00000181031
Kidney	GroupB	ENSG00000057704
Kidney	GroupB	ENSG00000135218
Kidney	GroupB	ENSG00000259969
Kidney	GroupB	ENSG00000256463
Kidney	GroupB	ENSG00000238010
Kidney	GroupB	ENSG00000237667
Kidney	GroupB	ENSG00000197757
Kidney	GroupB	ENSG00000204603
Kidney	GroupB	ENSG00000241224
Kidney	GroupB	ENSG00000105997
Kidney	GroupB	ENSG00000170166
Kidney	GroupB	ENSG00000233101
Kidney	GroupB	ENSG00000176678
Kidney	GroupB	ENSG00000225329
Kidney	GroupB	ENSG00000135480
Kidney	GroupB	ENSG00000133107
Kidney	GroupB	ENSG00000258081
Kidney	GroupB	ENSG00000150551
Kidney	GroupB	ENSG00000134873
Kidney	GroupB	ENSG00000138061
Kidney	GroupB	ENSG00000266928
Kidney	GroupB	ENSG00000258847
Kidney	GroupB	ENSG00000168505
Kidney	GroupB	ENSG00000174827
Kidney	GroupB	ENSG00000263146
Kidney	GroupB	ENSG00000257335
Kidney	GroupB	ENSG00000211863
Kidney	GroupB	ENSG00000184163
Kidney	GroupB	ENSG00000205579
Kidney	GroupB	ENSG00000182870
Kidney	GroupB	ENSG00000258548
Kidney	GroupB	ENSG00000269043
Kidney	GroupB	ENSG00000106013
Kidney	GroupB	ENSG00000198976
Kidney	GroupB	ENSG00000226363
Kidney	GroupB	ENSG00000219159
Kidney	GroupB	ENSG00000128604
Kidney	GroupB	ENSG00000167580
Kidney	GroupB	ENSG00000241158
Kidney	GroupB	ENSG00000241181
Kidney	GroupB	ENSG00000133393
Kidney	GroupB	ENSG00000182866
Kidney	GroupB	ENSG00000257178
Kidney	GroupB	ENSG00000255509
Kidney	GroupB	ENSG00000144724
Kidney	GroupB	ENSG00000198353
Kidney	GroupB	ENSG00000261170
Kidney	GroupB	ENSG00000207924
Kidney	GroupB	ENSG00000101198
Kidney	GroupB	ENSG00000253151
Kidney	GroupB	ENSG00000224189
Kidney	GroupB	ENSG00000167653
Kidney	GroupB	ENSG00000227947
Kidney	GroupB	ENSG00000179837
Kidney	GroupB	ENSG00000179676
Kidney	GroupB	ENSG00000142273
Kidney	GroupB	ENSG00000186051
Kidney	GroupB	ENSG00000248265
Kidney	GroupB	ENSG00000103449
Kidney	GroupB	ENSG00000065675
Kidney	GroupB	ENSG00000229941
Kidney	GroupB	ENSG00000123388
Kidney	GroupB	ENSG00000261795
Kidney	GroupB	ENSG00000259787
Kidney	GroupB	ENSG00000173917
Kidney	GroupB	ENSG00000228630
Kidney	GroupB	ENSG00000138079
Kidney	GroupB	ENSG00000240225
Kidney	GroupB	ENSG00000211857
Kidney	GroupB	ENSG00000261161
Kidney	GroupB	ENSG00000243350
Kidney	GroupB	ENSG00000224577
Kidney	GroupB	ENSG00000176383
Kidney	GroupB	ENSG00000169344
Kidney	GroupB	ENSG00000257723
Kidney	GroupB	ENSG00000109182
Kidney	GroupB	ENSG00000207744
Kidney	GroupB	ENSG00000197891
Kidney	GroupB	ENSG00000173876
Kidney	GroupB	ENSG00000042493
Kidney	GroupB	ENSG00000167165
Kidney	GroupB	ENSG00000133256
Kidney	GroupB	ENSG00000162366
Kidney	GroupB	ENSG00000070915
Kidney	GroupB	ENSG00000256576
Kidney	GroupB	ENSG00000133519
Kidney	GroupB	ENSG00000262558
Kidney	GroupB	ENSG00000090565
Kidney	GroupB	ENSG00000145832
Kidney	GroupB	ENSG00000149658
Kidney	GroupB	ENSG00000111110
Kidney	GroupB	ENSG00000239887
Kidney	GroupB	ENSG00000163364
Kidney	GroupB	ENSG00000064393
Kidney	GroupB	ENSG00000261047
Kidney	GroupB	ENSG00000131037
Kidney	GroupB	ENSG00000250432
Kidney	GroupB	ENSG00000156413
Kidney	GroupB	ENSG00000005073
Kidney	GroupB	ENSG00000163694
Kidney	GroupB	ENSG00000250829
Kidney	GroupB	ENSG00000220256
Kidney	GroupB	ENSG00000251493
Kidney	GroupB	ENSG00000108753
Kidney	GroupB	ENSG00000130540
Kidney	GroupB	ENSG00000242686
Kidney	GroupB	ENSG00000236272
Kidney	GroupB	ENSG00000232190
Kidney	GroupB	ENSG00000261363
Kidney	GroupB	ENSG00000227131
Kidney	GroupB	ENSG00000162426
Kidney	GroupB	ENSG00000205089
Kidney	GroupB	ENSG00000164325
Kidney	GroupB	ENSG00000227869
Kidney	GroupB	ENSG00000207931
Kidney	GroupB	ENSG00000261250
Kidney	GroupB	ENSG00000225968
Kidney	GroupB	ENSG00000233082
Kidney	GroupB	ENSG00000250208
Kidney	GroupB	ENSG00000261399
Kidney	GroupB	ENSG00000249599
Kidney	GroupB	ENSG00000260257
Kidney	GroupB	ENSG00000131620
Kidney	GroupB	ENSG00000215802
Kidney	GroupB	ENSG00000241388
Kidney	GroupB	ENSG00000172818
Kidney	GroupB	ENSG00000251554
Kidney	GroupB	ENSG00000170382
Kidney	GroupB	ENSG00000262061
Kidney	GroupB	ENSG00000164363
Kidney	GroupB	ENSG00000157111
Kidney	GroupB	ENSG00000250439
Kidney	GroupB	ENSG00000250133
Kidney	GroupB	ENSG00000261634
Kidney	GroupB	ENSG00000238541
Kidney	GroupB	ENSG00000251151
Kidney	GroupB	ENSG00000128652
Kidney	GroupB	ENSG00000183454
Kidney	GroupB	ENSG00000207571
Liver	GroupB	ENSG00000228697
Liver	GroupB	ENSG00000083842
Liver	GroupB	ENSG00000198482
Liver	GroupB	ENSG00000267216
Liver	GroupB	ENSG00000164674
Liver	GroupB	ENSG00000078403
Liver	GroupB	ENSG00000196547
Liver	GroupB	ENSG00000111799
Liver	GroupB	ENSG00000065665
Liver	GroupB	ENSG00000125149
Liver	GroupB	ENSG00000099256
Liver	GroupB	ENSG00000242242
Liver	GroupB	ENSG00000116514
Liver	GroupB	ENSG00000207608
Liver	GroupB	ENSG00000231584
Liver	GroupB	ENSG00000197153
Liver	GroupB	ENSG00000204406
Liver	GroupB	ENSG00000238274
Liver	GroupB	ENSG00000164011
Liver	GroupB	ENSG00000203875
Liver	GroupB	ENSG00000186907
Liver	GroupB	ENSG00000181035
Liver	GroupB	ENSG00000119929
Liver	GroupB	ENSG00000158480
Liver	GroupB	ENSG00000206190
Liver	GroupB	ENSG00000261372
Liver	GroupB	ENSG00000076321
Liver	GroupB	ENSG00000159882
Liver	GroupB	ENSG00000249471
Liver	GroupB	ENSG00000211945
Liver	GroupB	ENSG00000170631
Liver	GroupB	ENSG00000207993
Liver	GroupB	ENSG00000233822
Liver	GroupB	ENSG00000197037
Liver	GroupB	ENSG00000244062
Liver	GroupB	ENSG00000146151
Liver	GroupB	ENSG00000178401
Liver	GroupB	ENSG00000003137
Liver	GroupB	ENSG00000196226
Liver	GroupB	ENSG00000236924
Liver	GroupB	ENSG00000166997
Liver	GroupB	ENSG00000235072
Liver	GroupB	ENSG00000111850
Liver	GroupB	ENSG00000213753
Liver	GroupB	ENSG00000074047
Liver	GroupB	ENSG00000204227
Liver	GroupB	ENSG00000144730
Liver	GroupB	ENSG00000157927
Liver	GroupB	ENSG00000184999
Liver	GroupB	ENSG00000168913
Liver	GroupB	ENSG00000132204
Liver	GroupB	ENSG00000233588
Liver	GroupB	ENSG00000145386
Liver	GroupB	ENSG00000196176
Liver	GroupB	ENSG00000204356
Liver	GroupB	ENSG00000262185
Liver	GroupB	ENSG00000185591
Liver	GroupB	ENSG00000258056
Liver	GroupB	ENSG00000231563
Liver	GroupB	ENSG00000135333
Liver	GroupB	ENSG00000075826
Liver	GroupB	ENSG00000118922
Liver	GroupB	ENSG00000167635
Liver	GroupB	ENSG00000054793
Liver	GroupB	ENSG00000264621
Liver	GroupB	ENSG00000271155
Liver	GroupB	ENSG00000260231
Liver	GroupB	ENSG00000204178
Liver	GroupB	ENSG00000224738
Liver	GroupB	ENSG00000182566
Liver	GroupB	ENSG00000264679
Liver	GroupB	ENSG00000261096
Liver	GroupB	ENSG00000007944
Liver	GroupB	ENSG00000184702
Liver	GroupB	ENSG00000240463
Liver	GroupB	ENSG00000187607
Liver	GroupB	ENSG00000243818
Liver	GroupB	ENSG00000037749
Liver	GroupB	ENSG00000186354
Liver	GroupB	ENSG00000163389
Liver	GroupB	ENSG00000262454
Liver	GroupB	ENSG00000137133
Liver	GroupB	ENSG00000055955
Liver	GroupB	ENSG00000232759
Liver	GroupB	ENSG00000135541
Liver	GroupB	ENSG00000228541
Liver	GroupB	ENSG00000150281
Liver	GroupB	ENSG00000159579
Liver	GroupB	ENSG00000088876
Liver	GroupB	ENSG00000121966
Liver	GroupB	ENSG00000138802
Liver	GroupB	ENSG00000110274
Liver	GroupB	ENSG00000136485
Liver	GroupB	ENSG00000092098
Liver	GroupB	ENSG00000242829
Liver	GroupB	ENSG00000107882
Liver	GroupB	ENSG00000187990
Liver	GroupB	ENSG00000119760
Liver	GroupB	ENSG00000166562
Liver	GroupB	ENSG00000245598
Liver	GroupB	ENSG00000157741
Liver	GroupB	ENSG00000152117
Liver	GroupB	ENSG00000154188
Liver	GroupB	ENSG00000259563
Liver	GroupB	ENSG00000099977
Liver	GroupB	ENSG00000232034
Liver	GroupB	ENSG00000152242
Liver	GroupB	ENSG00000085276
Liver	GroupB	ENSG00000241973
Liver	GroupB	ENSG00000259606
Liver	GroupB	ENSG00000063660
Liver	GroupB	ENSG00000250959
Liver	GroupB	ENSG00000064601
Liver	GroupB	ENSG00000104047
Liver	GroupB	ENSG00000124198
Liver	GroupB	ENSG00000054611
Liver	GroupB	ENSG00000235142
Liver	GroupB	ENSG00000110025
Liver	GroupB	ENSG00000139977
Liver	GroupB	ENSG00000248863
Liver	GroupB	ENSG00000137494
Liver	GroupB	ENSG00000155530
Liver	GroupB	ENSG00000182255
Liver	GroupB	ENSG00000111716
Liver	GroupB	ENSG00000131375
Liver	GroupB	ENSG00000182168
Liver	GroupB	ENSG00000179820
Liver	GroupB	ENSG00000207612
Liver	GroupB	ENSG00000269693
Liver	GroupB	ENSG00000196652
Liver	GroupB	ENSG00000182013
Liver	GroupB	ENSG00000197054
Liver	GroupB	ENSG00000198610
Liver	GroupB	ENSG00000144524
Liver	GroupB	ENSG00000164576
Liver	GroupB	ENSG00000168297
Liver	GroupB	ENSG00000135655
Liver	GroupB	ENSG00000176753
Liver	GroupB	ENSG00000237494
Liver	GroupB	ENSG00000215957
Liver	GroupB	ENSG00000169385
Liver	GroupB	ENSG00000241597
Liver	GroupB	ENSG00000103599
Liver	GroupB	ENSG00000080603
Liver	GroupB	ENSG00000135482
Liver	GroupB	ENSG00000256720
Liver	GroupB	ENSG00000267796
Liver	GroupB	ENSG00000165506
Liver	GroupB	ENSG00000120549
Liver	GroupB	ENSG00000231113
Liver	GroupB	ENSG00000254331
Liver	GroupB	ENSG00000230424
Liver	GroupB	ENSG00000267547
Liver	GroupB	ENSG00000260500
Liver	GroupB	ENSG00000264070
Liver	GroupB	ENSG00000207930
Liver	GroupB	ENSG00000066322
Liver	GroupB	ENSG00000116260
Liver	GroupB	ENSG00000211588
Liver	GroupB	ENSG00000172201
Liver	GroupB	ENSG00000196968
Liver	GroupB	ENSG00000180785
Liver	GroupB	ENSG00000161573
Liver	GroupB	ENSG00000174851
Liver	GroupB	ENSG00000132823
Liver	GroupB	ENSG00000123154
Liver	GroupB	ENSG00000122490
Liver	GroupB	ENSG00000106246
Liver	GroupB	ENSG00000266649
Liver	GroupB	ENSG00000177337
Liver	GroupB	ENSG00000146242
Liver	GroupB	ENSG00000188486
Liver	GroupB	ENSG00000140829
Liver	GroupB	ENSG00000165655
Liver	GroupB	ENSG00000171357
Liver	GroupB	ENSG00000128309
Liver	GroupB	ENSG00000181039
Liver	GroupB	ENSG00000164039
Liver	GroupB	ENSG00000100836
Liver	GroupB	ENSG00000239779
Liver	GroupB	ENSG00000158315
Liver	GroupB	ENSG00000234444
Liver	GroupB	ENSG00000258526
Liver	GroupB	ENSG00000229294
Liver	GroupB	ENSG00000099204
Liver	GroupB	ENSG00000246560
Liver	GroupB	ENSG00000188987
Liver	GroupB	ENSG00000124678
Liver	GroupB	ENSG00000171236
Liver	GroupB	ENSG00000078898
Liver	GroupB	ENSG00000196678
Liver	GroupB	ENSG00000196236
Liver	GroupB	ENSG00000151445
Liver	GroupB	ENSG00000100124
Liver	GroupB	ENSG00000114742
Liver	GroupB	ENSG00000143858
Liver	GroupB	ENSG00000233892
Liver	GroupB	ENSG00000231307
Liver	GroupB	ENSG00000263753
Liver	GroupB	ENSG00000257509
Liver	GroupB	ENSG00000178028
Liver	GroupB	ENSG00000117528
Liver	GroupB	ENSG00000211972
Liver	GroupB	ENSG00000232559
Liver	GroupB	ENSG00000206579
Liver	GroupB	ENSG00000145287
Liver	GroupB	ENSG00000116747
Liver	GroupB	ENSG00000221031
Liver	GroupB	ENSG00000071462
Liver	GroupB	ENSG00000269019
Liver	GroupB	ENSG00000172869
Liver	GroupB	ENSG00000169692
Liver	GroupB	ENSG00000130997
Liver	GroupB	ENSG00000221487
Liver	GroupB	ENSG00000181585
Liver	GroupB	ENSG00000121848
Liver	GroupB	ENSG00000127152
Liver	GroupB	ENSG00000101144
Liver	GroupB	ENSG00000039068
Liver	GroupB	ENSG00000247970
Liver	GroupB	ENSG00000108947
Liver	GroupB	ENSG00000150667
Liver	GroupB	ENSG00000248866
Liver	GroupB	ENSG00000089041
Liver	GroupB	ENSG00000177239
Liver	GroupB	ENSG00000144645
Liver	GroupB	ENSG00000227946
Liver	GroupB	ENSG00000080031
Liver	GroupB	ENSG00000151657
Liver	GroupB	ENSG00000263775
Liver	GroupB	ENSG00000223891
Liver	GroupB	ENSG00000156858
Liver	GroupB	ENSG00000159079
Liver	GroupB	ENSG00000141446
Liver	GroupB	ENSG00000204619
Liver	GroupB	ENSG00000166734
Liver	GroupB	ENSG00000244486
Liver	GroupB	ENSG00000198185
Liver	GroupB	ENSG00000166797
Liver	GroupB	ENSG00000117682
Liver	GroupB	ENSG00000132182
Liver	GroupB	ENSG00000115274
Liver	GroupB	ENSG00000158270
Liver	GroupB	ENSG00000111540
Liver	GroupB	ENSG00000146278
Liver	GroupB	ENSG00000115827
Liver	GroupB	ENSG00000198721
Liver	GroupB	ENSG00000121775
Liver	GroupB	ENSG00000116127
Liver	GroupB	ENSG00000262026
Liver	GroupB	ENSG00000137812
Liver	GroupB	ENSG00000165863
Liver	GroupB	ENSG00000137522
Liver	GroupB	ENSG00000101421
Liver	GroupB	ENSG00000226442
Liver	GroupB	ENSG00000207959
Liver	GroupB	ENSG00000120075
Liver	GroupB	ENSG00000230439
Liver	GroupB	ENSG00000207754
Liver	GroupB	ENSG00000207243
Liver	GroupB	ENSG00000254897
Liver	GroupB	ENSG00000230793
Liver	GroupB	ENSG00000258611
Liver	GroupB	ENSG00000177133
Liver	GroupB	ENSG00000154743
Liver	GroupB	ENSG00000034510
Liver	GroupB	ENSG00000160991
Liver	GroupB	ENSG00000103089
Liver	GroupB	ENSG00000063046
Liver	GroupB	ENSG00000114251
Liver	GroupB	ENSG00000111271
Liver	GroupB	ENSG00000225177
Liver	GroupB	ENSG00000257512
Liver	GroupB	ENSG00000270344
Liver	GroupB	ENSG00000234502
Liver	GroupB	ENSG00000139631
Liver	GroupB	ENSG00000156299
Liver	GroupB	ENSG00000180008
Liver	GroupB	ENSG00000138629
Liver	GroupB	ENSG00000104129
Liver	GroupB	ENSG00000011021
Liver	GroupB	ENSG00000121270
Liver	GroupB	ENSG00000258861
Liver	GroupB	ENSG00000101384
Liver	GroupB	ENSG00000153487
Liver	GroupB	ENSG00000159111
Liver	GroupB	ENSG00000213088
Liver	GroupB	ENSG00000124608
Liver	GroupB	ENSG00000203801
Liver	GroupB	ENSG00000010539
Liver	GroupB	ENSG00000197147
Liver	GroupB	ENSG00000253878
Liver	GroupB	ENSG00000237529
Liver	GroupB	ENSG00000260586
Liver	GroupB	ENSG00000085465
Liver	GroupB	ENSG00000248858
Liver	GroupB	ENSG00000186230
Liver	GroupB	ENSG00000166272
Liver	GroupB	ENSG00000137269
Liver	GroupB	ENSG00000241985
Liver	GroupB	ENSG00000232316
Liver	GroupB	ENSG00000264429
Liver	GroupB	ENSG00000256811
Liver	GroupB	ENSG00000167523
Liver	GroupB	ENSG00000155508
Liver	GroupB	ENSG00000102683
Liver	GroupB	ENSG00000064995
Liver	GroupB	ENSG00000246705
Liver	GroupB	ENSG00000256018
Liver	GroupB	ENSG00000130768
Liver	GroupB	ENSG00000179136
Liver	GroupB	ENSG00000120686
Liver	GroupB	ENSG00000207558
Liver	GroupB	ENSG00000163536
Liver	GroupB	ENSG00000002330
Liver	GroupB	ENSG00000115947
Liver	GroupB	ENSG00000226472
Liver	GroupB	ENSG00000104369
Liver	GroupB	ENSG00000167524
Liver	GroupB	ENSG00000242853
Liver	GroupB	ENSG00000240041
Liver	GroupB	ENSG00000124782
Liver	GroupB	ENSG00000184012
Liver	GroupB	ENSG00000175356
Liver	GroupB	ENSG00000153790
Liver	GroupB	ENSG00000259437
Liver	GroupB	ENSG00000208027
Liver	GroupB	ENSG00000173581
Liver	GroupB	ENSG00000249240
Liver	GroupB	ENSG00000166073
Liver	GroupB	ENSG00000143033
Liver	GroupB	ENSG00000214313
Liver	GroupB	ENSG00000058063
Liver	GroupB	ENSG00000237989
Liver	GroupB	ENSG00000170745
Liver	GroupB	ENSG00000063180
Liver	GroupB	ENSG00000166845
Liver	GroupB	ENSG00000132664
Liver	GroupB	ENSG00000251667
Liver	GroupB	ENSG00000218336
Liver	GroupB	ENSG00000222236
Liver	GroupB	ENSG00000132780
Liver	GroupB	ENSG00000155368
Liver	GroupB	ENSG00000136378
Liver	GroupB	ENSG00000236066
Liver	GroupB	ENSG00000255173
Liver	GroupB	ENSG00000252609
Liver	GroupB	ENSG00000180098
Liver	GroupB	ENSG00000143321
Liver	GroupB	ENSG00000186889
Liver	GroupB	ENSG00000248441
Liver	GroupB	ENSG00000107819
Liver	GroupB	ENSG00000167130
Liver	GroupB	ENSG00000204352
Liver	GroupB	ENSG00000108018
Liver	GroupB	ENSG00000017797
Liver	GroupB	ENSG00000142528
Liver	GroupB	ENSG00000269416
Liver	GroupB	ENSG00000113739
Liver	GroupB	ENSG00000086544
Liver	GroupB	ENSG00000240849
Liver	GroupB	ENSG00000134317
Liver	GroupB	ENSG00000261188
Liver	GroupB	ENSG00000163166
Liver	GroupB	ENSG00000112282
Liver	GroupB	ENSG00000254505
Liver	GroupB	ENSG00000269463
Liver	GroupB	ENSG00000116785
Liver	GroupB	ENSG00000146215
Liver	GroupB	ENSG00000260236
Liver	GroupB	ENSG00000172660
Liver	GroupB	ENSG00000260949
Liver	GroupB	ENSG00000236848
Liver	GroupB	ENSG00000267655
Liver	GroupB	ENSG00000103496
Liver	GroupB	ENSG00000241839
Liver	GroupB	ENSG00000160051
Liver	GroupB	ENSG00000108641
Liver	GroupB	ENSG00000237852
Liver	GroupB	ENSG00000109111
Liver	GroupB	ENSG00000114735
Liver	GroupB	ENSG00000128917
Liver	GroupB	ENSG00000205363
Liver	GroupB	ENSG00000140941
Liver	GroupB	ENSG00000132591
Liver	GroupB	ENSG00000204070
Liver	GroupB	ENSG00000226648
Liver	GroupB	ENSG00000110002
Liver	GroupB	ENSG00000207569
Liver	GroupB	ENSG00000260337
Liver	GroupB	ENSG00000257084
Liver	GroupB	ENSG00000151881
Liver	GroupB	ENSG00000250312
Liver	GroupB	ENSG00000137216
Liver	GroupB	ENSG00000255647
Liver	GroupB	ENSG00000239282
Liver	GroupB	ENSG00000248721
Liver	GroupB	ENSG00000120053
Liver	GroupB	ENSG00000109065
Liver	GroupB	ENSG00000093134
Liver	GroupB	ENSG00000139636
Liver	GroupB	ENSG00000261056
Liver	GroupB	ENSG00000271259
Liver	GroupB	ENSG00000128590
Liver	GroupB	ENSG00000144810
Liver	GroupB	ENSG00000242748
Liver	GroupB	ENSG00000181027
Liver	GroupB	ENSG00000266993
Liver	GroupB	ENSG00000164404
Liver	GroupB	ENSG00000197927
Liver	GroupB	ENSG00000149582
Liver	GroupB	ENSG00000234869
Liver	GroupB	ENSG00000257285
Liver	GroupB	ENSG00000203727
Liver	GroupB	ENSG00000151135
Liver	GroupB	ENSG00000130713
Liver	GroupB	ENSG00000243696
Liver	GroupB	ENSG00000226410
Liver	GroupB	ENSG00000099246
Liver	GroupB	ENSG00000165684
Liver	GroupB	ENSG00000076382
Liver	GroupB	ENSG00000242337
Liver	GroupB	ENSG00000189129
Liver	GroupB	ENSG00000240053
Liver	GroupB	ENSG00000238763
Liver	GroupB	ENSG00000240225
Liver	GroupB	ENSG00000082516
Liver	GroupB	ENSG00000132970
Liver	GroupB	ENSG00000198736
Liver	GroupB	ENSG00000223804
Liver	GroupB	ENSG00000214835
Liver	GroupB	ENSG00000188542
Liver	GroupB	ENSG00000149483
Liver	GroupB	ENSG00000183251
Liver	GroupB	ENSG00000066855
Liver	GroupB	ENSG00000229700
Liver	GroupB	ENSG00000136805
Liver	GroupB	ENSG00000243455
Liver	GroupB	ENSG00000247982
Liver	GroupB	ENSG00000226683
Liver	GroupB	ENSG00000184009
Liver	GroupB	ENSG00000154263
Liver	GroupB	ENSG00000255986
Liver	GroupB	ENSG00000128607
Liver	GroupB	ENSG00000238422
Liver	GroupB	ENSG00000129009
Liver	GroupB	ENSG00000109610
Liver	GroupB	ENSG00000243477
Liver	GroupB	ENSG00000118946
Liver	GroupB	ENSG00000100221
Liver	GroupB	ENSG00000204967
Liver	GroupB	ENSG00000197013
Liver	GroupB	ENSG00000177410
Liver	GroupB	ENSG00000185614
Liver	GroupB	ENSG00000137449
Liver	GroupB	ENSG00000178053
Liver	GroupB	ENSG00000233376
Liver	GroupB	ENSG00000258900
Liver	GroupB	ENSG00000196417
Liver	GroupB	ENSG00000228340
Liver	GroupB	ENSG00000251562
Liver	GroupB	ENSG00000185019
Liver	GroupB	ENSG00000137337
Liver	GroupB	ENSG00000199020
Liver	GroupB	ENSG00000265032
Liver	GroupB	ENSG00000254864
Liver	GroupB	ENSG00000264444
Liver	GroupB	ENSG00000111859
Liver	GroupB	ENSG00000233175
Liver	GroupB	ENSG00000135775
Liver	GroupB	ENSG00000244119
Liver	GroupB	ENSG00000182348
Liver	GroupB	ENSG00000109079
Liver	GroupB	ENSG00000138092
Liver	GroupB	ENSG00000085274
Liver	GroupB	ENSG00000137507
Liver	GroupB	ENSG00000175600
Liver	GroupB	ENSG00000221639
Liver	GroupB	ENSG00000141562
Liver	GroupB	ENSG00000235701
Liver	GroupB	ENSG00000186648
Liver	GroupB	ENSG00000213551
Liver	GroupB	ENSG00000125851
Liver	GroupB	ENSG00000228629
Liver	GroupB	ENSG00000089902
Liver	GroupB	ENSG00000198900
Liver	GroupB	ENSG00000171497
Liver	GroupB	ENSG00000255559
Liver	GroupB	ENSG00000152433
Liver	GroupB	ENSG00000185129
Liver	GroupB	ENSG00000108278
Liver	GroupB	ENSG00000204822
Liver	GroupB	ENSG00000257017
Liver	GroupB	ENSG00000236662
Liver	GroupB	ENSG00000244357
Liver	GroupB	ENSG00000152931
Liver	GroupB	ENSG00000229057
Liver	GroupB	ENSG00000040608
Liver	GroupB	ENSG00000254943
Liver	GroupB	ENSG00000256197
Liver	GroupB	ENSG00000151498
Liver	GroupB	ENSG00000232044
Liver	GroupB	ENSG00000235109
Liver	GroupB	ENSG00000119636
Liver	GroupB	ENSG00000165061
Liver	GroupB	ENSG00000163462
Liver	GroupB	ENSG00000242472
Liver	GroupB	ENSG00000064933
Liver	GroupB	ENSG00000169607
Liver	GroupB	ENSG00000197892
Liver	GroupB	ENSG00000149260
Liver	GroupB	ENSG00000075914
Liver	GroupB	ENSG00000182319
Liver	GroupB	ENSG00000142449
Liver	GroupB	ENSG00000238970
Liver	GroupB	ENSG00000134152
Liver	GroupB	ENSG00000227210
Liver	GroupB	ENSG00000146859
Liver	GroupB	ENSG00000264882
Liver	GroupB	ENSG00000265451
Liver	GroupB	ENSG00000236869
Liver	GroupB	ENSG00000223999
Liver	GroupB	ENSG00000151575
Liver	GroupB	ENSG00000113318
Liver	GroupB	ENSG00000089225
Liver	GroupB	ENSG00000265719
Liver	GroupB	ENSG00000226318
Liver	GroupB	ENSG00000180574
Liver	GroupB	ENSG00000202560
Liver	GroupB	ENSG00000270604
Liver	GroupB	ENSG00000199088
Liver	GroupB	ENSG00000119725
Liver	GroupB	ENSG00000265250
Liver	GroupB	ENSG00000232229
Liver	GroupB	ENSG00000236512
Liver	GroupB	ENSG00000265722
Liver	GroupB	ENSG00000232946
Liver	GroupB	ENSG00000253017
Liver	GroupB	ENSG00000094975
Liver	GroupB	ENSG00000070047
Liver	GroupB	ENSG00000161036
Liver	GroupB	ENSG00000207697
Liver	GroupB	ENSG00000128274
Liver	GroupB	ENSG00000132703
Liver	GroupB	ENSG00000259768
Liver	GroupB	ENSG00000087365
Liver	GroupB	ENSG00000171798
Liver	GroupB	ENSG00000256943
Liver	GroupB	ENSG00000222514
Liver	GroupB	ENSG00000115808
Liver	GroupB	ENSG00000268162
Liver	GroupB	ENSG00000208023
Liver	GroupB	ENSG00000250796
Liver	GroupB	ENSG00000144867
Liver	GroupB	ENSG00000169826
Liver	GroupB	ENSG00000136870
Liver	GroupB	ENSG00000227376
Liver	GroupB	ENSG00000133083
Liver	GroupB	ENSG00000204228
Liver	GroupB	ENSG00000174502
Liver	GroupB	ENSG00000162300
Liver	GroupB	ENSG00000207743
Liver	GroupB	ENSG00000148343
Liver	GroupB	ENSG00000157429
Liver	GroupB	ENSG00000239116
Liver	GroupB	ENSG00000177602
Liver	GroupB	ENSG00000261533
Liver	GroupB	ENSG00000202361
Liver	GroupB	ENSG00000251164
Liver	GroupB	ENSG00000270674
Liver	GroupB	ENSG00000242522
Liver	GroupB	ENSG00000185480
Liver	GroupB	ENSG00000248079
Liver	GroupB	ENSG00000085741
Liver	GroupB	ENSG00000143140
Liver	GroupB	ENSG00000202078
Liver	GroupB	ENSG00000222940
Liver	GroupB	ENSG00000207961
Liver	GroupB	ENSG00000243754
Liver	GroupB	ENSG00000254577
Liver	GroupB	ENSG00000074416
Liver	GroupB	ENSG00000258472
Liver	GroupB	ENSG00000128595
Liver	GroupB	ENSG00000132693
Liver	GroupB	ENSG00000139364
Liver	GroupB	ENSG00000197734
Liver	GroupB	ENSG00000169621
Liver	GroupB	ENSG00000149196
Liver	GroupB	ENSG00000243788
Liver	GroupB	ENSG00000241269
Liver	GroupB	ENSG00000266151
Liver	GroupB	ENSG00000145721
Liver	GroupB	ENSG00000267692
Liver	GroupB	ENSG00000093009
Liver	GroupB	ENSG00000229492
Liver	GroupB	ENSG00000197696
Liver	GroupB	ENSG00000120471
Liver	GroupB	ENSG00000231050
Liver	GroupB	ENSG00000213920
Liver	GroupB	ENSG00000140987
Liver	GroupB	ENSG00000096401
Liver	GroupB	ENSG00000251634
Liver	GroupB	ENSG00000146006
Liver	GroupB	ENSG00000198874
Liver	GroupB	ENSG00000259923
Liver	GroupB	ENSG00000116670
Liver	GroupB	ENSG00000048991
Liver	GroupB	ENSG00000177736
Liver	GroupB	ENSG00000256588
Liver	GroupB	ENSG00000022976
Liver	GroupB	ENSG00000135763
Liver	GroupB	ENSG00000071082
Liver	GroupB	ENSG00000197562
Liver	GroupB	ENSG00000261139
Liver	GroupB	ENSG00000240204
Liver	GroupB	ENSG00000240050
Liver	GroupB	ENSG00000072195
Liver	GroupB	ENSG00000260391
Liver	GroupB	ENSG00000120158
Liver	GroupB	ENSG00000164306
Liver	GroupB	ENSG00000134824
Liver	GroupB	ENSG00000104728
Liver	GroupB	ENSG00000157103
Liver	GroupB	ENSG00000163586
Liver	GroupB	ENSG00000000971
Liver	GroupB	ENSG00000172831
Liver	GroupB	ENSG00000182985
Liver	GroupB	ENSG00000172893
Liver	GroupB	ENSG00000170608
Liver	GroupB	ENSG00000160961
Liver	GroupB	ENSG00000215447
Liver	GroupB	ENSG00000172273
Liver	GroupB	ENSG00000090512
Liver	GroupB	ENSG00000207101
Liver	GroupB	ENSG00000170465
Liver	GroupB	ENSG00000132164
Liver	GroupB	ENSG00000124693
Liver	GroupB	ENSG00000196867
Liver	GroupB	ENSG00000186115
Liver	GroupB	ENSG00000089775
Liver	GroupB	ENSG00000080910
Liver	GroupB	ENSG00000158856
Liver	GroupB	ENSG00000123405
Liver	GroupB	ENSG00000134240
Liver	GroupB	ENSG00000109072
Liver	GroupB	ENSG00000204576
Liver	GroupB	ENSG00000133401
Liver	GroupB	ENSG00000132855
Liver	GroupB	ENSG00000106689
Liver	GroupB	ENSG00000186529
Liver	GroupB	ENSG00000091138
Liver	GroupB	ENSG00000172497
Liver	GroupB	ENSG00000125144
Liver	GroupB	ENSG00000169814
Liver	GroupB	ENSG00000105398
Liver	GroupB	ENSG00000159208
Liver	GroupB	ENSG00000174992
Liver	GroupB	ENSG00000140284
Liver	GroupB	ENSG00000197702
Liver	GroupB	ENSG00000258460
Liver	GroupB	ENSG00000131781
Liver	GroupB	ENSG00000267596
Liver	GroupB	ENSG00000009780
Liver	GroupB	ENSG00000163347
Liver	GroupB	ENSG00000205269
Liver	GroupB	ENSG00000111785
Liver	GroupB	ENSG00000198515
Liver	GroupB	ENSG00000161653
Liver	GroupB	ENSG00000196628
Liver	GroupB	ENSG00000152104
Liver	GroupB	ENSG00000088854
Liver	GroupB	ENSG00000136872
Liver	GroupB	ENSG00000216588
Liver	GroupB	ENSG00000269624
Liver	GroupB	ENSG00000249746
Liver	GroupB	ENSG00000136631
Liver	GroupB	ENSG00000183722
Liver	GroupB	ENSG00000203747
Liver	GroupB	ENSG00000148584
Liver	GroupB	ENSG00000186818
Liver	GroupB	ENSG00000170522
Liver	GroupB	ENSG00000131378
Liver	GroupB	ENSG00000118096
Liver	GroupB	ENSG00000231100
Liver	GroupB	ENSG00000203307
Liver	GroupB	ENSG00000172331
Liver	GroupB	ENSG00000104549
Liver	GroupB	ENSG00000198300
Liver	GroupB	ENSG00000069188
Liver	GroupB	ENSG00000243955
Liver	GroupB	ENSG00000182718
Liver	GroupB	ENSG00000119547
Liver	GroupB	ENSG00000141391
Liver	GroupB	ENSG00000079557
Liver	GroupB	ENSG00000143537
Liver	GroupB	ENSG00000106624
Liver	GroupB	ENSG00000171488
Liver	GroupB	ENSG00000106258
Liver	GroupB	ENSG00000123411
Liver	GroupB	ENSG00000249948
Liver	GroupB	ENSG00000080618
Liver	GroupB	ENSG00000112902
Liver	GroupB	ENSG00000141034
Liver	GroupB	ENSG00000151617
Liver	GroupB	ENSG00000185716
Liver	GroupB	ENSG00000173614
Liver	GroupB	ENSG00000251129
Liver	GroupB	ENSG00000177511
Liver	GroupB	ENSG00000115425
Liver	GroupB	ENSG00000015520
Liver	GroupB	ENSG00000163554
Liver	GroupB	ENSG00000196565
Liver	GroupB	ENSG00000011600
Liver	GroupB	ENSG00000106785
Liver	GroupB	ENSG00000256157
Liver	GroupB	ENSG00000198774
Liver	GroupB	ENSG00000072571
Liver	GroupB	ENSG00000204482
Liver	GroupB	ENSG00000091583
Liver	GroupB	ENSG00000180035
Liver	GroupB	ENSG00000178381
Liver	GroupB	ENSG00000187720
Liver	GroupB	ENSG00000122068
Liver	GroupB	ENSG00000257046
Liver	GroupB	ENSG00000120437
Liver	GroupB	ENSG00000086506
Liver	GroupB	ENSG00000140093
Liver	GroupB	ENSG00000214135
Liver	GroupB	ENSG00000155629
Liver	GroupB	ENSG00000211452
Liver	GroupB	ENSG00000197903
Liver	GroupB	ENSG00000131482
Liver	GroupB	ENSG00000136929
Liver	GroupB	ENSG00000119906
Liver	GroupB	ENSG00000076706
Liver	GroupB	ENSG00000165682
Liver	GroupB	ENSG00000234460
Liver	GroupB	ENSG00000039537
Liver	GroupB	ENSG00000260629
Liver	GroupB	ENSG00000079102
Liver	GroupB	ENSG00000116678
Liver	GroupB	ENSG00000235954
Liver	GroupB	ENSG00000090013
Liver	GroupB	ENSG00000224122
Liver	GroupB	ENSG00000205403
Liver	GroupB	ENSG00000259974
Liver	GroupB	ENSG00000185278
Liver	GroupB	ENSG00000246100
Liver	GroupB	ENSG00000136908
Liver	GroupB	ENSG00000113742
Liver	GroupB	ENSG00000253986
Liver	GroupB	ENSG00000196660
Liver	GroupB	ENSG00000171843
Liver	GroupB	ENSG00000154734
Liver	GroupB	ENSG00000143369
Liver	GroupB	ENSG00000229988
Liver	GroupB	ENSG00000184117
Liver	GroupB	ENSG00000138443
Liver	GroupB	ENSG00000102935
Liver	GroupB	ENSG00000116690
Liver	GroupB	ENSG00000205362
Liver	GroupB	ENSG00000204599
Liver	GroupB	ENSG00000125730
Liver	GroupB	ENSG00000124568
Liver	GroupB	ENSG00000226419
Liver	GroupB	ENSG00000112486
Liver	GroupB	ENSG00000207934
Liver	GroupB	ENSG00000151632
Liver	GroupB	ENSG00000134575
Liver	GroupB	ENSG00000139219
Liver	GroupB	ENSG00000173120
Liver	GroupB	ENSG00000131462
Liver	GroupB	ENSG00000100225
Liver	GroupB	ENSG00000136305
Liver	GroupB	ENSG00000183508
Liver	GroupB	ENSG00000148965
Liver	GroupB	ENSG00000165471
Liver	GroupB	ENSG00000112195
Liver	GroupB	ENSG00000157087
Liver	GroupB	ENSG00000005844
Liver	GroupB	ENSG00000170099
Liver	GroupB	ENSG00000250436
Liver	GroupB	ENSG00000184349
Liver	GroupB	ENSG00000153956
Liver	GroupB	ENSG00000178229
Liver	GroupB	ENSG00000141219
Liver	GroupB	ENSG00000100852
Liver	GroupB	ENSG00000140285
Liver	GroupB	ENSG00000213424
Liver	GroupB	ENSG00000196532
Liver	GroupB	ENSG00000174175
Liver	GroupB	ENSG00000083838
Liver	GroupB	ENSG00000104522
Liver	GroupB	ENSG00000260054
Liver	GroupB	ENSG00000136327
Liver	GroupB	ENSG00000229481
Liver	GroupB	ENSG00000105254
Liver	GroupB	ENSG00000083857
Liver	GroupB	ENSG00000160753
Liver	GroupB	ENSG00000125266
Liver	GroupB	ENSG00000105379
Liver	GroupB	ENSG00000101162
Liver	GroupB	ENSG00000253666
Liver	GroupB	ENSG00000176845
Liver	GroupB	ENSG00000171759
Liver	GroupB	ENSG00000135148
Liver	GroupB	ENSG00000187048
Liver	GroupB	ENSG00000137563
Liver	GroupB	ENSG00000122194
Liver	GroupB	ENSG00000198182
Liver	GroupB	ENSG00000234906
Liver	GroupB	ENSG00000111275
Liver	GroupB	ENSG00000166793
Liver	GroupB	ENSG00000083312
Liver	GroupB	ENSG00000253483
Liver	GroupB	ENSG00000163581
Liver	GroupB	ENSG00000239219
Liver	GroupB	ENSG00000145321
Liver	GroupB	ENSG00000269054
Liver	GroupB	ENSG00000188610
Liver	GroupB	ENSG00000139209
Liver	GroupB	ENSG00000264066
Liver	GroupB	ENSG00000152518
Liver	GroupB	ENSG00000102743
Liver	GroupB	ENSG00000100652
Liver	GroupB	ENSG00000120709
Liver	GroupB	ENSG00000130940
Liver	GroupB	ENSG00000134538
Liver	GroupB	ENSG00000237338
Liver	GroupB	ENSG00000151789
Liver	GroupB	ENSG00000111700
Liver	GroupB	ENSG00000060971
Liver	GroupB	ENSG00000133019
Liver	GroupB	ENSG00000172748
Liver	GroupB	ENSG00000183134
Liver	GroupB	ENSG00000143257
Liver	GroupB	ENSG00000267804
Liver	GroupB	ENSG00000163995
Liver	GroupB	ENSG00000131845
Liver	GroupB	ENSG00000175329
Liver	GroupB	ENSG00000106351
Liver	GroupB	ENSG00000203706
Liver	GroupB	ENSG00000196136
Liver	GroupB	ENSG00000125037
Liver	GroupB	ENSG00000071575
Liver	GroupB	ENSG00000176593
Liver	GroupB	ENSG00000187758
Liver	GroupB	ENSG00000172057
Liver	GroupB	ENSG00000171557
Liver	GroupB	ENSG00000079819
Liver	GroupB	ENSG00000182165
Liver	GroupB	ENSG00000213931
Liver	GroupB	ENSG00000244734
Liver	GroupB	ENSG00000136868
Liver	GroupB	ENSG00000157064
Liver	GroupB	ENSG00000100897
Liver	GroupB	ENSG00000106346
Liver	GroupB	ENSG00000215811
Liver	GroupB	ENSG00000065970
Liver	GroupB	ENSG00000122787
Liver	GroupB	ENSG00000185813
Liver	GroupB	ENSG00000104783
Liver	GroupB	ENSG00000197128
Liver	GroupB	ENSG00000228436
Liver	GroupB	ENSG00000107758
Liver	GroupB	ENSG00000171766
Liver	GroupB	ENSG00000148218
Liver	GroupB	ENSG00000165300
Liver	GroupB	ENSG00000009950
Liver	GroupB	ENSG00000074603
Liver	GroupB	ENSG00000198099
Liver	GroupB	ENSG00000142279
Liver	GroupB	ENSG00000181619
Liver	GroupB	ENSG00000108433
Liver	GroupB	ENSG00000133985
Liver	GroupB	ENSG00000204610
Liver	GroupB	ENSG00000169877
Liver	GroupB	ENSG00000160870
Liver	GroupB	ENSG00000198374
Liver	GroupB	ENSG00000115317
Liver	GroupB	ENSG00000180998
Liver	GroupB	ENSG00000196369
Liver	GroupB	ENSG00000113790
Liver	GroupB	ENSG00000182310
Liver	GroupB	ENSG00000126562
Liver	GroupB	ENSG00000079459
Liver	GroupB	ENSG00000168306
Liver	GroupB	ENSG00000020129
Liver	GroupB	ENSG00000140470
Liver	GroupB	ENSG00000167191
Liver	GroupB	ENSG00000100036
Liver	GroupB	ENSG00000259203
Liver	GroupB	ENSG00000165914
Liver	GroupB	ENSG00000116698
Liver	GroupB	ENSG00000168234
Liver	GroupB	ENSG00000117601
Liver	GroupB	ENSG00000132196
Liver	GroupB	ENSG00000213190
Liver	GroupB	ENSG00000197461
Liver	GroupB	ENSG00000213934
Liver	GroupB	ENSG00000178467
Liver	GroupB	ENSG00000256087
Liver	GroupB	ENSG00000162039
Liver	GroupB	ENSG00000186910
Liver	GroupB	ENSG00000147852
Liver	GroupB	ENSG00000178445
Liver	GroupB	ENSG00000131069
Liver	GroupB	ENSG00000268006
Liver	GroupB	ENSG00000144852
Liver	GroupB	ENSG00000188185
Liver	GroupB	ENSG00000101290
Liver	GroupB	ENSG00000262445
Liver	GroupB	ENSG00000225649
Liver	GroupB	ENSG00000130203
Liver	GroupB	ENSG00000107789
Liver	GroupB	ENSG00000145632
Liver	GroupB	ENSG00000253837
Liver	GroupB	ENSG00000170890
Liver	GroupB	ENSG00000145555
Liver	GroupB	ENSG00000167371
Liver	GroupB	ENSG00000178537
Liver	GroupB	ENSG00000140367
Liver	GroupB	ENSG00000247828
Liver	GroupB	ENSG00000110243
Liver	GroupB	ENSG00000168826
Liver	GroupB	ENSG00000269343
Liver	GroupB	ENSG00000213859
Liver	GroupB	ENSG00000125534
Liver	GroupB	ENSG00000161944
Liver	GroupB	ENSG00000201176
Liver	GroupB	ENSG00000110169
Liver	GroupB	ENSG00000196890
Liver	GroupB	ENSG00000247844
Liver	GroupB	ENSG00000244503
Liver	GroupB	ENSG00000168502
Liver	GroupB	ENSG00000141469
Liver	GroupB	ENSG00000124225
Liver	GroupB	ENSG00000143158
Liver	GroupB	ENSG00000187134
Liver	GroupB	ENSG00000185811
Liver	GroupB	ENSG00000179104
Liver	GroupB	ENSG00000171475
Liver	GroupB	ENSG00000239521
Liver	GroupB	ENSG00000139174
Liver	GroupB	ENSG00000149657
Liver	GroupB	ENSG00000117122
Liver	GroupB	ENSG00000185158
Liver	GroupB	ENSG00000143224
Liver	GroupB	ENSG00000101463
Liver	GroupB	ENSG00000147955
Liver	GroupB	ENSG00000164171
Liver	GroupB	ENSG00000146039
Liver	GroupB	ENSG00000167515
Liver	GroupB	ENSG00000140443
Liver	GroupB	ENSG00000171560
Liver	GroupB	ENSG00000176148
Liver	GroupB	ENSG00000156535
Liver	GroupB	ENSG00000196188
Liver	GroupB	ENSG00000187010
Liver	GroupB	ENSG00000263813
Liver	GroupB	ENSG00000111339
Liver	GroupB	ENSG00000241570
Liver	GroupB	ENSG00000116991
Liver	GroupB	ENSG00000174996
Liver	GroupB	ENSG00000102870
Liver	GroupB	ENSG00000072080
Liver	GroupB	ENSG00000103876
Liver	GroupB	ENSG00000116133
Liver	GroupB	ENSG00000163687
Liver	GroupB	ENSG00000116128
Liver	GroupB	ENSG00000120324
Liver	GroupB	ENSG00000244968
Liver	GroupB	ENSG00000267431
Liver	GroupB	ENSG00000231889
Liver	GroupB	ENSG00000169856
Liver	GroupB	ENSG00000199488
Liver	GroupB	ENSG00000108309
Liver	GroupB	ENSG00000261701
Liver	GroupB	ENSG00000226266
Liver	GroupB	ENSG00000111752
Liver	GroupB	ENSG00000172955
Liver	GroupB	ENSG00000119927
Liver	GroupB	ENSG00000140937
Liver	GroupB	ENSG00000146013
Liver	GroupB	ENSG00000185559
Liver	GroupB	ENSG00000128253
Liver	GroupB	ENSG00000244041
Liver	GroupB	ENSG00000124564
Liver	GroupB	ENSG00000138030
Liver	GroupB	ENSG00000118058
Liver	GroupB	ENSG00000229711
Liver	GroupB	ENSG00000077782
Liver	GroupB	ENSG00000162493
Liver	GroupB	ENSG00000165702
Liver	GroupB	ENSG00000204613
Liver	GroupB	ENSG00000182611
Liver	GroupB	ENSG00000137561
Lung	GroupB	ENSG00000254267
Lung	GroupB	ENSG00000017427
Lung	GroupB	ENSG00000267280
Lung	GroupB	ENSG00000248228
Lung	GroupB	ENSG00000164690
Lung	GroupB	ENSG00000173068
Lung	GroupB	ENSG00000201609
Lung	GroupB	ENSG00000238946
Lung	GroupB	ENSG00000257060
Lung	GroupB	ENSG00000265487
Lung	GroupB	ENSG00000239617
Lung	GroupB	ENSG00000270058
Lung	GroupB	ENSG00000232530
Lung	GroupB	ENSG00000255693
Lung	GroupB	ENSG00000242810
Lung	GroupB	ENSG00000226425
Lung	GroupB	ENSG00000241644
Lung	GroupB	ENSG00000251884
Lung	GroupB	ENSG00000228559
Lung	GroupB	ENSG00000256079
Lung	GroupB	ENSG00000236172
Lung	GroupB	ENSG00000243445
Lung	GroupB	ENSG00000254534
Lung	GroupB	ENSG00000256101
Lung	GroupB	ENSG00000257376
Lung	GroupB	ENSG00000138468
Lung	GroupB	ENSG00000266970
Lung	GroupB	ENSG00000166801
Lung	GroupB	ENSG00000105443
Lung	GroupB	ENSG00000258578
Lung	GroupB	ENSG00000250959
Lung	GroupB	ENSG00000078098
Lung	GroupB	ENSG00000267364
Lung	GroupB	ENSG00000238322
Lung	GroupB	ENSG00000228308
Lung	GroupB	ENSG00000233108
Lung	GroupB	ENSG00000228027
Lung	GroupB	ENSG00000196946
Lung	GroupB	ENSG00000255299
Lung	GroupB	ENSG00000235974
Lung	GroupB	ENSG00000241014
Lung	GroupB	ENSG00000223652
Lung	GroupB	ENSG00000203815
Lung	GroupB	ENSG00000153165
Lung	GroupB	ENSG00000266076
Lung	GroupB	ENSG00000240809
[truncated: 1,060 more rows]

## Sheet: Supplementary Table 8
Supplementary Table 8. GO biological process categories of different coordinate regulation groups.
DAVID (version 6.8) was used to perform Gene Ontology (GO) analysis. GO terms with P value < 0.05 were considered as statistically significant.
Tissue	Group	Term	Number of genes	P value	Genes	Fold enrichment	Bonferroni	Benjamini	FDR
Heart	GroupA	GO:0061061~muscle structure development	18	5.55225e-12	ENSG00000092054, ENSG00000129991, ENSG00000077009, ENSG00000149596, ENSG00000077522, ENSG00000111245, ENSG00000112531, ENSG00000023902, ENSG00000134571, ENSG00000174437, ENSG00000112276, ENSG00000175206, ENSG00000154556, ENSG00000133454, ENSG00000141385, ENSG00000113196, ENSG00000036672, ENSG00000140795	8.84773	1.05159e-08	1.0516e-08	1.01551e-08
Heart	GroupA	GO:0048738~cardiac muscle tissue development	12	2.71155e-11	ENSG00000092054, ENSG00000129991, ENSG00000113196, ENSG00000077522, ENSG00000111245, ENSG00000134571, ENSG00000182963, ENSG00000154556, ENSG00000112276, ENSG00000133454, ENSG00000175206, ENSG00000140795	18.6785	5.13568e-08	2.56784e-08	2.47971e-08
Heart	GroupA	GO:0007507~heart development	16	9.86085e-11	ENSG00000092054, ENSG00000129991, ENSG00000151067, ENSG00000049323, ENSG00000077522, ENSG00000111245, ENSG00000134571, ENSG00000112276, ENSG00000175206, ENSG00000113430, ENSG00000154556, ENSG00000133454, ENSG00000113196, ENSG00000136383, ENSG00000182963, ENSG00000140795	9.06512	1.86765e-07	5.69381e-08	5.4984e-08
Heart	GroupA	GO:0014706~striated muscle tissue development	14	1.20249e-10	ENSG00000092054, ENSG00000129991, ENSG00000149596, ENSG00000077522, ENSG00000111245, ENSG00000134571, ENSG00000112276, ENSG00000175206, ENSG00000154556, ENSG00000133454, ENSG00000113196, ENSG00000036672, ENSG00000182963, ENSG00000140795	11.5807	2.27752e-07	5.69381e-08	5.4984e-08
Heart	GroupA	GO:0060537~muscle tissue development	14	2.15865e-10	ENSG00000092054, ENSG00000129991, ENSG00000149596, ENSG00000077522, ENSG00000111245, ENSG00000134571, ENSG00000112276, ENSG00000175206, ENSG00000154556, ENSG00000133454, ENSG00000113196, ENSG00000036672, ENSG00000182963, ENSG00000140795	11.0443	4.08847e-07	8.17695e-08	7.89632e-08
Heart	GroupA	GO:0072359~circulatory system development	18	8.15562e-09	ENSG00000092054, ENSG00000104332, ENSG00000129991, ENSG00000151067, ENSG00000049323, ENSG00000077522, ENSG00000111245, ENSG00000112531, ENSG00000134571, ENSG00000112276, ENSG00000175206, ENSG00000113430, ENSG00000154556, ENSG00000133454, ENSG00000113196, ENSG00000136383, ENSG00000182963, ENSG00000140795	5.51461	1.54466e-05	2.20668e-06	2.13095e-06
Heart	GroupA	GO:0072358~cardiovascular system development	18	8.15562e-09	ENSG00000092054, ENSG00000104332, ENSG00000129991, ENSG00000151067, ENSG00000049323, ENSG00000077522, ENSG00000111245, ENSG00000112531, ENSG00000134571, ENSG00000112276, ENSG00000175206, ENSG00000113430, ENSG00000154556, ENSG00000133454, ENSG00000113196, ENSG00000136383, ENSG00000182963, ENSG00000140795	5.51461	1.54466e-05	2.20668e-06	2.13095e-06
Heart	GroupA	GO:0042692~muscle cell differentiation	12	3.05132e-08	ENSG00000141385, ENSG00000077009, ENSG00000077522, ENSG00000111245, ENSG00000112531, ENSG00000023902, ENSG00000174437, ENSG00000154556, ENSG00000112276, ENSG00000133454, ENSG00000175206, ENSG00000140795	9.59726	5.77904e-05	7.22401e-06	6.97609e-06
Heart	GroupA	GO:0055001~muscle cell development	9	3.83552e-08	ENSG00000141385, ENSG00000077522, ENSG00000111245, ENSG00000174437, ENSG00000154556, ENSG00000112276, ENSG00000133454, ENSG00000175206, ENSG00000140795	17.371	7.26422e-05	7.66202e-06	7.39907e-06
Heart	GroupA	GO:0055013~cardiac muscle cell development	7	4.12267e-08	ENSG00000077522, ENSG00000111245, ENSG00000154556, ENSG00000112276, ENSG00000133454, ENSG00000175206, ENSG00000140795	34.9417	7.80803e-05	7.66202e-06	7.39907e-06
Heart	GroupA	GO:0070252~actin-mediated cell contraction	8	4.44996e-08	ENSG00000092054, ENSG00000129991, ENSG00000151067, ENSG00000077522, ENSG00000111245, ENSG00000134571, ENSG00000182963, ENSG00000174437	23.1614	8.42787e-05	7.66202e-06	7.39907e-06
Heart	GroupA	GO:0055006~cardiac cell development	7	5.61155e-08	ENSG00000077522, ENSG00000111245, ENSG00000154556, ENSG00000112276, ENSG00000133454, ENSG00000175206, ENSG00000140795	33.2233	0.000106277	8.85689e-06	8.55293e-06
Heart	GroupA	GO:0008015~blood circulation	13	1.01345e-07	ENSG00000092054, ENSG00000129991, ENSG00000151067, ENSG00000174233, ENSG00000111245, ENSG00000134571, ENSG00000173641, ENSG00000174437, ENSG00000112276, ENSG00000175206, ENSG00000182963, ENSG00000166833, ENSG00000140795	7.43819	0.000191928	1.47651e-05	1.42584e-05
Heart	GroupA	GO:0003013~circulatory system process	13	1.10382e-07	ENSG00000092054, ENSG00000129991, ENSG00000151067, ENSG00000174233, ENSG00000111245, ENSG00000134571, ENSG00000173641, ENSG00000174437, ENSG00000112276, ENSG00000175206, ENSG00000182963, ENSG00000166833, ENSG00000140795	7.37985	0.000209041	1.49331e-05	1.44206e-05
Heart	GroupA	GO:0060048~cardiac muscle contraction	8	1.56951e-07	ENSG00000092054, ENSG00000129991, ENSG00000151067, ENSG00000111245, ENSG00000134571, ENSG00000182963, ENSG00000174437, ENSG00000175206	19.3011	0.000297221	1.98177e-05	1.91376e-05
Heart	GroupA	GO:0030048~actin filament-based movement	8	3.01337e-07	ENSG00000092054, ENSG00000129991, ENSG00000151067, ENSG00000077522, ENSG00000111245, ENSG00000134571, ENSG00000182963, ENSG00000174437	17.5465	0.000570569	3.56708e-05	3.44466e-05
Heart	GroupA	GO:0055002~striated muscle cell development	8	3.51199e-07	ENSG00000141385, ENSG00000077522, ENSG00000111245, ENSG00000154556, ENSG00000112276, ENSG00000133454, ENSG00000175206, ENSG00000140795	17.1566	0.00066495	3.91277e-05	3.77849e-05
Heart	GroupA	GO:1903522~regulation of blood circulation	10	6.97529e-07	ENSG00000092054, ENSG00000129991, ENSG00000151067, ENSG00000174233, ENSG00000111245, ENSG00000173641, ENSG00000182963, ENSG00000174437, ENSG00000112276, ENSG00000175206	9.65057	0.00132025	7.33956e-05	7.08767e-05
Heart	GroupA	GO:0044057~regulation of system process	12	8.44919e-07	ENSG00000092054, ENSG00000129991, ENSG00000151067, ENSG00000185739, ENSG00000174233, ENSG00000111245, ENSG00000134571, ENSG00000173641, ENSG00000182963, ENSG00000174437, ENSG00000112276, ENSG00000175206	6.89327	0.001599	8.42251e-05	8.13346e-05
Heart	GroupA	GO:0055007~cardiac muscle cell differentiation	7	9.09213e-07	ENSG00000077522, ENSG00000111245, ENSG00000154556, ENSG00000112276, ENSG00000133454, ENSG00000175206, ENSG00000140795	20.893	0.00172057	8.44178e-05	8.15206e-05
Heart	GroupA	GO:0003012~muscle system process	11	9.35994e-07	ENSG00000092054, ENSG00000129991, ENSG00000151067, ENSG00000185739, ENSG00000077522, ENSG00000111245, ENSG00000134571, ENSG00000182963, ENSG00000174437, ENSG00000154556, ENSG00000175206	7.86343	0.0017712	8.44178e-05	8.15206e-05
Heart	GroupA	GO:0008016~regulation of heart contraction	9	1.12109e-06	ENSG00000092054, ENSG00000129991, ENSG00000151067, ENSG00000111245, ENSG00000173641, ENSG00000182963, ENSG00000174437, ENSG00000112276, ENSG00000175206	11.1831	0.00212109	9.51444e-05	9.18792e-05
Heart	GroupA	GO:0006941~striated muscle contraction	8	1.1554e-06	ENSG00000092054, ENSG00000129991, ENSG00000151067, ENSG00000111245, ENSG00000134571, ENSG00000182963, ENSG00000174437, ENSG00000175206	14.3859	0.00218593	9.51444e-05	9.18792e-05
Heart	GroupA	GO:0060047~heart contraction	9	1.63354e-06	ENSG00000092054, ENSG00000129991, ENSG00000151067, ENSG00000111245, ENSG00000134571, ENSG00000182963, ENSG00000174437, ENSG00000112276, ENSG00000175206	10.6353	0.00308915	0.000128914	0.00012449
Heart	GroupA	GO:0003015~heart process	9	1.78907e-06	ENSG00000092054, ENSG00000129991, ENSG00000151067, ENSG00000111245, ENSG00000134571, ENSG00000182963, ENSG00000174437, ENSG00000112276, ENSG00000175206	10.5067	0.00338277	0.00013554	0.000130889
Heart	GroupA	GO:0051146~striated muscle cell differentiation	9	1.89962e-06	ENSG00000141385, ENSG00000077522, ENSG00000111245, ENSG00000023902, ENSG00000154556, ENSG00000112276, ENSG00000133454, ENSG00000175206, ENSG00000140795	10.4226	0.00359143	0.00013838	0.000133631
Heart	GroupA	GO:0035051~cardiocyte differentiation	7	3.48451e-06	ENSG00000077522, ENSG00000111245, ENSG00000154556, ENSG00000112276, ENSG00000133454, ENSG00000175206, ENSG00000140795	16.6116	0.00657795	0.000244432	0.000236044
Heart	GroupA	GO:0090257~regulation of muscle system process	8	4.57565e-06	ENSG00000092054, ENSG00000129991, ENSG00000151067, ENSG00000185739, ENSG00000111245, ENSG00000134571, ENSG00000174437, ENSG00000175206	11.6977	0.00862885	0.00030951	0.000298888
Heart	GroupA	GO:0033275~actin-myosin filament sliding	5	8.07986e-06	ENSG00000092054, ENSG00000129991, ENSG00000077522, ENSG00000111245, ENSG00000134571	38.0944	0.0151868	0.000510109	0.000492602
Heart	GroupA	GO:0030049~muscle filament sliding	5	8.07986e-06	ENSG00000092054, ENSG00000129991, ENSG00000077522, ENSG00000111245, ENSG00000134571	38.0944	0.0151868	0.000510109	0.000492602
Heart	GroupA	GO:0006942~regulation of striated muscle contraction	6	1.1259e-05	ENSG00000092054, ENSG00000151067, ENSG00000111245, ENSG00000134571, ENSG00000174437, ENSG00000175206	19.9667	0.0210988	0.000683017	0.000659577
Heart	GroupA	GO:0009888~tissue development	19	1.16834e-05	ENSG00000092054, ENSG00000104332, ENSG00000129991, ENSG00000149596, ENSG00000077522, ENSG00000111245, ENSG00000134571, ENSG00000174437, ENSG00000112276, ENSG00000175206, ENSG00000154556, ENSG00000131981, ENSG00000133454, ENSG00000169018, ENSG00000113196, ENSG00000036672, ENSG00000102996, ENSG00000182963, ENSG00000140795	3.13259	0.0218854	0.000683017	0.000659577
Heart	GroupA	GO:0006937~regulation of muscle contraction	7	1.19005e-05	ENSG00000092054, ENSG00000129991, ENSG00000151067, ENSG00000111245, ENSG00000134571, ENSG00000174437, ENSG00000175206	13.4213	0.0222876	0.000683017	0.000659577
Heart	GroupA	GO:0030029~actin filament-based process	12	1.336e-05	ENSG00000092054, ENSG00000104332, ENSG00000129991, ENSG00000151067, ENSG00000077522, ENSG00000111245, ENSG00000134571, ENSG00000167549, ENSG00000182963, ENSG00000174437, ENSG00000154556, ENSG00000140795	5.16995	0.0249866	0.000744232	0.000718691
Heart	GroupA	GO:0006936~muscle contraction	9	1.49281e-05	ENSG00000092054, ENSG00000129991, ENSG00000151067, ENSG00000077522, ENSG00000111245, ENSG00000134571, ENSG00000182963, ENSG00000174437, ENSG00000175206	7.87207	0.027878	0.000807823	0.000780099
Heart	GroupA	GO:0055010~ventricular cardiac muscle tissue morphogenesis	5	1.90856e-05	ENSG00000092054, ENSG00000129991, ENSG00000113196, ENSG00000111245, ENSG00000134571	30.7997	0.035503	0.00100412	0.000969656
Heart	GroupA	GO:0003229~ventricular cardiac muscle tissue development	5	2.86054e-05	ENSG00000092054, ENSG00000129991, ENSG00000113196, ENSG00000111245, ENSG00000134571	27.8382	0.0527379	0.00146429	0.00141403
Heart	GroupA	GO:0003231~cardiac ventricle development	6	4.92177e-05	ENSG00000092054, ENSG00000129991, ENSG00000113196, ENSG00000049323, ENSG00000111245, ENSG00000134571	14.7212	0.0890075	0.00245311	0.00236893
Heart	GroupA	GO:0055008~cardiac muscle tissue morphogenesis	5	5.74757e-05	ENSG00000092054, ENSG00000129991, ENSG00000113196, ENSG00000111245, ENSG00000134571	23.3482	0.103146	0.00279126	0.00269546
Heart	GroupA	GO:0003208~cardiac ventricle morphogenesis	5	0.000103361	ENSG00000092054, ENSG00000129991, ENSG00000113196, ENSG00000111245, ENSG00000134571	20.1054	0.177803	0.00489413	0.00472616
Heart	GroupA	GO:0048731~system development	29	0.000107855	ENSG00000092054, ENSG00000149596, ENSG00000049323, ENSG00000174233, ENSG00000134571, ENSG00000175206, ENSG00000113430, ENSG00000131981, ENSG00000166313, ENSG00000113196, ENSG00000144749, ENSG00000036672, ENSG00000182963, ENSG00000166833, ENSG00000104332, ENSG00000151067, ENSG00000129991, ENSG00000077522, ENSG00000111245, ENSG00000112531, ENSG00000134369, ENSG00000151640, ENSG00000112276, ENSG0000…	1.95665	0.184773	0.00491887	0.00475006
Heart	GroupA	GO:0060415~muscle tissue morphogenesis	5	0.000109077	ENSG00000092054, ENSG00000129991, ENSG00000113196, ENSG00000111245, ENSG00000134571	19.8299	0.186658	0.00491887	0.00475006
Heart	GroupA	GO:0048644~muscle organ morphogenesis	5	0.000155729	ENSG00000092054, ENSG00000129991, ENSG00000113196, ENSG00000111245, ENSG00000134571	18.0948	0.255449	0.00685934	0.00662393
Heart	GroupA	GO:0003205~cardiac chamber development	6	0.000178636	ENSG00000092054, ENSG00000129991, ENSG00000113196, ENSG00000049323, ENSG00000111245, ENSG00000134571	11.2071	0.287066	0.00768945	0.00742556
Heart	GroupA	GO:0048856~anatomical structure development	33	0.000205833	ENSG00000092054, ENSG00000149596, ENSG00000049323, ENSG00000174233, ENSG00000134571, ENSG00000174437, ENSG00000175206, ENSG00000113430, ENSG00000131981, ENSG00000166313, ENSG00000113196, ENSG00000144749, ENSG00000036672, ENSG00000182963, ENSG00000166833, ENSG00000104332, ENSG00000151067, ENSG00000129991, ENSG00000077009, ENSG00000077522, ENSG00000111245, ENSG00000112531, ENSG00000023902, ENSG0000…	1.74567	0.322868	0.00853949	0.00824643
Heart	GroupA	GO:0044767~single-organism developmental process	33	0.000207401	ENSG00000092054, ENSG00000149596, ENSG00000049323, ENSG00000174233, ENSG00000134571, ENSG00000174437, ENSG00000175206, ENSG00000113430, ENSG00000131981, ENSG00000166313, ENSG00000113196, ENSG00000144749, ENSG00000036672, ENSG00000182963, ENSG00000166833, ENSG00000104332, ENSG00000151067, ENSG00000129991, ENSG00000077009, ENSG00000077522, ENSG00000111245, ENSG00000112531, ENSG00000023902, ENSG0000…	1.74504	0.324875	0.00853949	0.00824643
Heart	GroupA	GO:0007517~muscle organ development	8	0.00022848	ENSG00000092054, ENSG00000129991, ENSG00000113196, ENSG00000149596, ENSG00000036672, ENSG00000111245, ENSG00000134571, ENSG00000112276	6.32825	0.351303	0.00920724	0.00889126
Heart	GroupA	GO:0009653~anatomical structure morphogenesis	21	0.000250684	ENSG00000092054, ENSG00000104332, ENSG00000129991, ENSG00000151067, ENSG00000077522, ENSG00000111245, ENSG00000112531, ENSG00000023902, ENSG00000134571, ENSG00000151640, ENSG00000112276, ENSG00000113430, ENSG00000133454, ENSG00000169018, ENSG00000166313, ENSG00000141385, ENSG00000113196, ENSG00000144749, ENSG00000102996, ENSG00000182963, ENSG00000140795	2.31086	0.378025	0.00989157	0.0095521
Heart	GroupA	GO:0002027~regulation of heart rate	5	0.000266941	ENSG00000092054, ENSG00000151067, ENSG00000174437, ENSG00000112276, ENSG00000175206	15.7346	0.396888	0.0103181	0.00996396
Heart	GroupA	GO:0065008~regulation of biological quality	25	0.000277184	ENSG00000092054, ENSG00000149596, ENSG00000049323, ENSG00000174233, ENSG00000114923, ENSG00000133065, ENSG00000174437, ENSG00000175206, ENSG00000109193, ENSG00000036672, ENSG00000182963, ENSG00000166833, ENSG00000104332, ENSG00000048028, ENSG00000151067, ENSG00000129991, ENSG00000077522, ENSG00000111245, ENSG00000112531, ENSG00000023902, ENSG00000023228, ENSG00000112276, ENSG00000020577, ENSG0000…	2.04	0.40848	0.0104997	0.0101394
Heart	GroupA	GO:0032502~developmental process	33	0.000370526	ENSG00000092054, ENSG00000149596, ENSG00000049323, ENSG00000174233, ENSG00000134571, ENSG00000174437, ENSG00000175206, ENSG00000113430, ENSG00000131981, ENSG00000166313, ENSG00000113196, ENSG00000144749, ENSG00000036672, ENSG00000182963, ENSG00000166833, ENSG00000104332, ENSG00000151067, ENSG00000129991, ENSG00000077009, ENSG00000077522, ENSG00000111245, ENSG00000112531, ENSG00000023902, ENSG0000…	1.69639	0.50436	0.0137603	0.0132881
Heart	GroupA	GO:0007275~multicellular organism development	30	0.000419932	ENSG00000092054, ENSG00000149596, ENSG00000049323, ENSG00000174233, ENSG00000134571, ENSG00000175206, ENSG00000113430, ENSG00000131981, ENSG00000166313, ENSG00000113196, ENSG00000144749, ENSG00000036672, ENSG00000182963, ENSG00000166833, ENSG00000104332, ENSG00000151067, ENSG00000129991, ENSG00000077522, ENSG00000111245, ENSG00000112531, ENSG00000134369, ENSG00000151640, ENSG00000112276, ENSG0000…	1.78091	0.548653	0.0152952	0.0147703
Heart	GroupA	GO:0070838~divalent metal ion transport	8	0.00050906	ENSG00000151067, ENSG00000141385, ENSG00000185739, ENSG00000149596, ENSG00000133065, ENSG00000174437, ENSG00000131981, ENSG00000175206	5.541	0.61879	0.0181917	0.0175674
Heart	GroupA	GO:0072511~divalent inorganic cation transport	8	0.0005312	ENSG00000151067, ENSG00000141385, ENSG00000185739, ENSG00000149596, ENSG00000133065, ENSG00000174437, ENSG00000131981, ENSG00000175206	5.50152	0.634453	0.0186314	0.0179919
Heart	GroupA	GO:0003206~cardiac chamber morphogenesis	5	0.000686743	ENSG00000092054, ENSG00000129991, ENSG00000113196, ENSG00000111245, ENSG00000134571	12.2677	0.727778	0.0236489	0.0228373
Heart	GroupA	GO:0003008~system process	17	0.000807684	ENSG00000092054, ENSG00000129991, ENSG00000151067, ENSG00000185739, ENSG00000174233, ENSG00000077522, ENSG00000111245, ENSG00000134571, ENSG00000173641, ENSG00000174437, ENSG00000112276, ENSG00000175206, ENSG00000154556, ENSG00000144749, ENSG00000182963, ENSG00000166833, ENSG00000140795	2.44379	0.783545	0.027317	0.0263795
Heart	GroupA	GO:0048513~animal organ development	22	0.000926577	ENSG00000092054, ENSG00000104332, ENSG00000129991, ENSG00000151067, ENSG00000149596, ENSG00000049323, ENSG00000077522, ENSG00000111245, ENSG00000134571, ENSG00000112276, ENSG00000175206, ENSG00000113430, ENSG00000154556, ENSG00000131981, ENSG00000133454, ENSG00000169018, ENSG00000113196, ENSG00000144749, ENSG00000136383, ENSG00000036672, ENSG00000182963, ENSG00000140795	2.0356	0.827223	0.0307884	0.0297318
Heart	GroupA	GO:0003300~cardiac muscle hypertrophy	4	0.00110632	ENSG00000092054, ENSG00000174437, ENSG00000154556, ENSG00000175206	19.3011	0.877119	0.0361272	0.0348873
Heart	GroupA	GO:0030154~cell differentiation	24	0.00115636	ENSG00000104332, ENSG00000129991, ENSG00000077009, ENSG00000174233, ENSG00000077522, ENSG00000111245, ENSG00000112531, ENSG00000023902, ENSG00000134369, ENSG00000151640, ENSG00000174437, ENSG00000112276, ENSG00000175206, ENSG00000154556, ENSG00000131981, ENSG00000133454, ENSG00000169018, ENSG00000166313, ENSG00000141385, ENSG00000113196, ENSG00000109193, ENSG00000102996, ENSG00000182963, ENSG0000…	1.90263	0.888242	0.0371212	0.0358472
Heart	GroupA	GO:0014897~striated muscle hypertrophy	4	0.00121686	ENSG00000092054, ENSG00000174437, ENSG00000154556, ENSG00000175206	18.6785	0.900354	0.0384121	0.0370939
Heart	GroupA	GO:0042391~regulation of membrane potential	7	0.0013451	ENSG00000151067, ENSG00000077522, ENSG00000023228, ENSG00000182963, ENSG00000174437, ENSG00000112276, ENSG00000175206	5.6295	0.921866	0.0417642	0.0403309
Heart	GroupA	GO:0014896~muscle hypertrophy	4	0.00145827	ENSG00000092054, ENSG00000174437, ENSG00000154556, ENSG00000175206	17.5465	0.93696	0.0445479	0.043019
Heart	GroupA	GO:0006816~calcium ion transport	7	0.00152541	ENSG00000151067, ENSG00000141385, ENSG00000185739, ENSG00000149596, ENSG00000174437, ENSG00000131981, ENSG00000175206	5.4922	0.944497	0.045859	0.0442852
Heart	GroupA	GO:0014898~cardiac muscle hypertrophy in response to stress	3	0.00167267	ENSG00000092054, ENSG00000174437, ENSG00000175206	48.2529	0.958025	0.048739	0.0470663
Heart	GroupA	GO:0003299~muscle hypertrophy in response to stress	3	0.00167267	ENSG00000092054, ENSG00000174437, ENSG00000175206	48.2529	0.958025	0.048739	0.0470663
Heart	GroupA	GO:0001570~vasculogenesis	4	0.00179971	ENSG00000129991, ENSG00000112531, ENSG00000182963, ENSG00000133454	16.3108	0.967016	0.0516462	0.0498737
Heart	GroupA	GO:0014887~cardiac muscle adaptation	3	0.00186539	ENSG00000092054, ENSG00000174437, ENSG00000175206	45.7132	0.97088	0.052217	0.050425
Heart	GroupA	GO:0048468~cell development	16	0.00187474	ENSG00000104332, ENSG00000174233, ENSG00000077522, ENSG00000111245, ENSG00000112531, ENSG00000151640, ENSG00000174437, ENSG00000112276, ENSG00000175206, ENSG00000154556, ENSG00000133454, ENSG00000169018, ENSG00000166313, ENSG00000141385, ENSG00000182963, ENSG00000140795	2.3538	0.971393	0.052217	0.050425
Heart	GroupA	GO:0070509~calcium ion import	5	0.0021664	ENSG00000151067, ENSG00000141385, ENSG00000149596, ENSG00000174437, ENSG00000131981	8.99122	0.983553	0.059466	0.0574252
Heart	GroupA	GO:0006928~movement of cell or subcellular component	15	0.00222069	ENSG00000092054, ENSG00000104332, ENSG00000129991, ENSG00000151067, ENSG00000077522, ENSG00000111245, ENSG00000023902, ENSG00000134571, ENSG00000134369, ENSG00000151640, ENSG00000174437, ENSG00000112276, ENSG00000154556, ENSG00000131981, ENSG00000182963	2.41936	0.985163	0.0600855	0.0580235
Heart	GroupA	GO:0051239~regulation of multicellular organismal process	19	0.00228438	ENSG00000092054, ENSG00000104332, ENSG00000129991, ENSG00000151067, ENSG00000185739, ENSG00000149596, ENSG00000174233, ENSG00000111245, ENSG00000134571, ENSG00000173641, ENSG00000174437, ENSG00000112276, ENSG00000175206, ENSG00000131981, ENSG00000166313, ENSG00000141385, ENSG00000036672, ENSG00000124831, ENSG00000182963	2.06876	0.986853	0.0609383	0.0588469
Heart	GroupA	GO:0044707~single-multicellular organism process	32	0.00253677	ENSG00000092054, ENSG00000149596, ENSG00000049323, ENSG00000174233, ENSG00000134571, ENSG00000174437, ENSG00000175206, ENSG00000113430, ENSG00000131981, ENSG00000166313, ENSG00000113196, ENSG00000144749, ENSG00000036672, ENSG00000124831, ENSG00000182963, ENSG00000166833, ENSG00000104332, ENSG00000151067, ENSG00000129991, ENSG00000077522, ENSG00000111245, ENSG00000112531, ENSG00000134369, ENSG0000…	1.5589	0.991858	0.0667313	0.0644411
Heart	GroupA	GO:0043500~muscle adaptation	4	0.00290838	ENSG00000092054, ENSG00000185739, ENSG00000174437, ENSG00000175206	13.7865	0.99598	0.0754586	0.0728689
Heart	GroupA	GO:0048869~cellular developmental process	24	0.00396862	ENSG00000104332, ENSG00000129991, ENSG00000077009, ENSG00000174233, ENSG00000077522, ENSG00000111245, ENSG00000112531, ENSG00000023902, ENSG00000134369, ENSG00000151640, ENSG00000174437, ENSG00000112276, ENSG00000175206, ENSG00000154556, ENSG00000131981, ENSG00000133454, ENSG00000169018, ENSG00000166313, ENSG00000141385, ENSG00000113196, ENSG00000109193, ENSG00000102996, ENSG00000182963, ENSG0000…	1.74058	0.999464	0.101575	0.0980893
Heart	GroupA	GO:0002026~regulation of the force of heart contraction	3	0.00404353	ENSG00000092054, ENSG00000111245, ENSG00000174437	31.0197	0.999535	0.102113	0.0986082
Heart	GroupA	GO:0034220~ion transmembrane transport	10	0.00484949	ENSG00000151067, ENSG00000141385, ENSG00000149596, ENSG00000077522, ENSG00000114923, ENSG00000133065, ENSG00000182963, ENSG00000174437, ENSG00000205560, ENSG00000175206	3.00641	0.9999	0.120854	0.116707
Heart	GroupA	GO:0032970~regulation of actin filament-based process	6	0.00549796	ENSG00000104332, ENSG00000151067, ENSG00000077522, ENSG00000134571, ENSG00000174437, ENSG00000140795	5.18538	0.999971	0.135236	0.130594
Heart	GroupA	GO:0030001~metal ion transport	9	0.00592611	ENSG00000151067, ENSG00000141385, ENSG00000185739, ENSG00000149596, ENSG00000077522, ENSG00000133065, ENSG00000174437, ENSG00000131981, ENSG00000175206	3.20105	0.999987	0.143898	0.13896
Heart	GroupA	GO:2001259~positive regulation of cation channel activity	3	0.00735863	ENSG00000149596, ENSG00000077522, ENSG00000175206	22.8566	0.999999	0.174215	0.168237
Heart	GroupA	GO:0014888~striated muscle adaptation	3	0.00735863	ENSG00000092054, ENSG00000174437, ENSG00000175206	22.8566	0.999999	0.174215	0.168237
Heart	GroupA	GO:0003007~heart morphogenesis	5	0.00768081	ENSG00000092054, ENSG00000129991, ENSG00000113196, ENSG00000111245, ENSG00000134571	6.29385	1	0.178766	0.172631
Heart	GroupA	GO:1903115~regulation of actin filament-based movement	3	0.00773959	ENSG00000151067, ENSG00000134571, ENSG00000174437	22.2706	1	0.178766	0.172631
Heart	GroupA	GO:0006811~ion transport	12	0.00905217	ENSG00000151067, ENSG00000141385, ENSG00000185739, ENSG00000149596, ENSG00000077522, ENSG00000114923, ENSG00000133065, ENSG00000182963, ENSG00000174437, ENSG00000205560, ENSG00000131981, ENSG00000175206	2.38286	1	0.206564	0.199475
Heart	GroupA	GO:0032501~multicellular organismal process	34	0.0104753	ENSG00000092054, ENSG00000149596, ENSG00000049323, ENSG00000174233, ENSG00000134571, ENSG00000173641, ENSG00000174437, ENSG00000175206, ENSG00000113430, ENSG00000131981, ENSG00000166313, ENSG00000113196, ENSG00000144749, ENSG00000036672, ENSG00000124831, ENSG00000182963, ENSG00000166833, ENSG00000104332, ENSG00000151067, ENSG00000129991, ENSG00000185739, ENSG00000077522, ENSG00000111245, ENSG0000…	1.40082	1	0.236192	0.228086
Heart	GroupA	GO:0098660~inorganic ion transmembrane transport	8	0.0110066	ENSG00000151067, ENSG00000141385, ENSG00000149596, ENSG00000077522, ENSG00000114923, ENSG00000133065, ENSG00000174437, ENSG00000175206	3.19467	1	0.245252	0.236836
Heart	GroupA	GO:0070588~calcium ion transmembrane transport	5	0.0122925	ENSG00000151067, ENSG00000141385, ENSG00000149596, ENSG00000174437, ENSG00000175206	5.48328	1	0.270722	0.261431
Heart	GroupA	GO:0030003~cellular cation homeostasis	7	0.0127863	ENSG00000129991, ENSG00000151067, ENSG00000141385, ENSG00000149596, ENSG00000114923, ENSG00000133065, ENSG00000174437	3.53686	1	0.277729	0.268198
Heart	GroupA	GO:0072503~cellular divalent inorganic cation homeostasis	6	0.012904	ENSG00000129991, ENSG00000151067, ENSG00000141385, ENSG00000149596, ENSG00000133065, ENSG00000174437	4.20606	1	0.277729	0.268198
Heart	GroupA	GO:0031032~actomyosin structure organization	4	0.0136248	ENSG00000104332, ENSG00000077522, ENSG00000111245, ENSG00000140795	7.87802	1	0.289948	0.279997
Heart	GroupA	GO:0030239~myofibril assembly	3	0.0139634	ENSG00000077522, ENSG00000111245, ENSG00000140795	16.3878	1	0.293852	0.283767
Heart	GroupA	GO:0006873~cellular ion homeostasis	7	0.0143723	ENSG00000129991, ENSG00000151067, ENSG00000141385, ENSG00000149596, ENSG00000114923, ENSG00000133065, ENSG00000174437	3.44663	1	0.299134	0.288868
Heart	GroupA	GO:1902041~regulation of extrinsic apoptotic signaling pathway via death domain receptors	3	0.0149828	ENSG00000104332, ENSG00000169018, ENSG00000131981	15.7918	1	0.305133	0.294661
Heart	GroupA	GO:0086003~cardiac muscle cell contraction	3	0.0149828	ENSG00000151067, ENSG00000182963, ENSG00000174437	15.7918	1	0.305133	0.294661
Heart	GroupA	GO:0048747~muscle fiber development	3	0.0155042	ENSG00000141385, ENSG00000111245, ENSG00000133454	15.5099	1	0.310054	0.299413
Heart	GroupA	GO:0072507~divalent inorganic cation homeostasis	6	0.0155518	ENSG00000129991, ENSG00000151067, ENSG00000141385, ENSG00000149596, ENSG00000133065, ENSG00000174437	4.01179	1	0.310054	0.299413
Heart	GroupA	GO:0044699~single-organism process	53	0.0159248	ENSG00000173281, ENSG00000049323, ENSG00000128274, ENSG00000133065, ENSG00000205560, ENSG00000166313, ENSG00000170801, ENSG00000109193, ENSG00000100302, ENSG00000124831, ENSG00000182963, ENSG00000166833, ENSG00000104332, ENSG00000048028, ENSG00000185739, ENSG00000077009, ENSG00000077522, ENSG00000023902, ENSG00000114850, ENSG00000134369, ENSG00000151640, ENSG00000023228, ENSG00000112276, ENSG0000…	1.14707	1	0.314183	0.3034
Heart	GroupA	GO:0006812~cation transport	9	0.0165507	ENSG00000151067, ENSG00000141385, ENSG00000185739, ENSG00000149596, ENSG00000077522, ENSG00000133065, ENSG00000174437, ENSG00000131981, ENSG00000175206	2.67247	1	0.323164	0.312074
Heart	GroupA	GO:0001944~vasculature development	7	0.0169413	ENSG00000104332, ENSG00000129991, ENSG00000113196, ENSG00000049323, ENSG00000112531, ENSG00000182963, ENSG00000133454	3.32233	1	0.327417	0.31618
Heart	GroupA	GO:0009887~organ morphogenesis	9	0.0181852	ENSG00000092054, ENSG00000104332, ENSG00000169018, ENSG00000129991, ENSG00000113196, ENSG00000144749, ENSG00000111245, ENSG00000134571, ENSG00000113430	2.62667	1	0.347907	0.335967
Heart	GroupA	GO:0048729~tissue morphogenesis	7	0.0184694	ENSG00000092054, ENSG00000104332, ENSG00000169018, ENSG00000129991, ENSG00000113196, ENSG00000111245, ENSG00000134571	3.25823	1	0.349811	0.337806
Heart	GroupA	GO:0043502~regulation of muscle adaptation	3	0.0187931	ENSG00000092054, ENSG00000185739, ENSG00000174437	14.0089	1	0.352417	0.340322
Heart	GroupA	GO:0098662~inorganic cation transmembrane transport	7	0.0202297	ENSG00000151067, ENSG00000141385, ENSG00000149596, ENSG00000077522, ENSG00000133065, ENSG00000174437, ENSG00000175206	3.19153	1	0.373659	0.360835
Heart	GroupA	GO:0030308~negative regulation of cell growth	4	0.0203204	ENSG00000104332, ENSG00000166313, ENSG00000111245, ENSG00000175206	6.77233	1	0.373659	0.360835
Heart	GroupA	GO:0086001~cardiac muscle cell action potential	3	0.0205382	ENSG00000151067, ENSG00000182963, ENSG00000174437	13.3623	1	0.374032	0.361196
Heart	GroupA	GO:0055080~cation homeostasis	7	0.0213683	ENSG00000129991, ENSG00000151067, ENSG00000141385, ENSG00000149596, ENSG00000114923, ENSG00000133065, ENSG00000174437	3.15182	1	0.385444	0.372216
Heart	GroupA	GO:1903779~regulation of cardiac conduction	3	0.0229661	ENSG00000129991, ENSG00000174437, ENSG00000175206	12.5877	1	0.403693	0.389839
Heart	GroupA	GO:0032414~positive regulation of ion transmembrane transporter activity	3	0.0229661	ENSG00000149596, ENSG00000077522, ENSG00000175206	12.5877	1	0.403693	0.389839
Heart	GroupA	GO:0014883~transition between fast and slow fiber	2	0.0235249	ENSG00000092054, ENSG00000174437	82.7192	1	0.403693	0.389839
Heart	GroupA	GO:0021675~nerve development	3	0.0235907	ENSG00000141385, ENSG00000144749, ENSG00000166833	12.4079	1	0.403693	0.389839
Heart	GroupA	GO:0098771~inorganic ion homeostasis	7	0.02362	ENSG00000129991, ENSG00000151067, ENSG00000141385, ENSG00000149596, ENSG00000114923, ENSG00000133065, ENSG00000174437	3.07997	1	0.403693	0.389839
Heart	GroupA	GO:0010959~regulation of metal ion transport	5	0.0236589	ENSG00000151067, ENSG00000149596, ENSG00000077522, ENSG00000131981, ENSG00000175206	4.49561	1	0.403693	0.389839
Heart	GroupA	GO:0006875~cellular metal ion homeostasis	6	0.02523	ENSG00000129991, ENSG00000151067, ENSG00000141385, ENSG00000149596, ENSG00000133065, ENSG00000174437	3.53789	1	0.426657	0.412014
Heart	GroupA	GO:0055117~regulation of cardiac muscle contraction	3	0.0261585	ENSG00000151067, ENSG00000174437, ENSG00000175206	11.7372	1	0.438444	0.423397
Heart	GroupA	GO:2001135~regulation of endocytic recycling	2	0.0268409	ENSG00000077522, ENSG00000112276	72.3793	1	0.445935	0.430631
Heart	GroupA	GO:0032411~positive regulation of transporter activity	3	0.0288344	ENSG00000149596, ENSG00000077522, ENSG00000175206	11.1353	1	0.474891	0.458593
Heart	GroupA	GO:0050801~ion homeostasis	7	0.0305817	ENSG00000129991, ENSG00000151067, ENSG00000141385, ENSG00000149596, ENSG00000114923, ENSG00000133065, ENSG00000174437	2.89931	1	0.499326	0.48219
Heart	GroupA	GO:0098655~cation transmembrane transport	7	0.0313263	ENSG00000151067, ENSG00000141385, ENSG00000149596, ENSG00000077522, ENSG00000133065, ENSG00000174437, ENSG00000175206	2.88282	1	0.507111	0.489707
Heart	GroupA	GO:0051924~regulation of calcium ion transport	4	0.0320081	ENSG00000151067, ENSG00000149596, ENSG00000131981, ENSG00000175206	5.67681	1	0.513757	0.496126
Heart	GroupA	GO:0055085~transmembrane transport	10	0.0329919	ENSG00000151067, ENSG00000141385, ENSG00000149596, ENSG00000077522, ENSG00000114923, ENSG00000133065, ENSG00000182963, ENSG00000174437, ENSG00000205560, ENSG00000175206	2.18999	1	0.523428	0.505465
Heart	GroupA	GO:0055082~cellular chemical homeostasis	7	0.0332398	ENSG00000129991, ENSG00000151067, ENSG00000141385, ENSG00000149596, ENSG00000114923, ENSG00000133065, ENSG00000174437	2.84239	1	0.523428	0.505465
Heart	GroupA	GO:0060442~branching involved in prostate gland morphogenesis	2	0.0334397	ENSG00000104332, ENSG00000169018	57.9034	1	0.523428	0.505465
Heart	GroupA	GO:1904062~regulation of cation transmembrane transport	4	0.0356931	ENSG00000151067, ENSG00000149596, ENSG00000077522, ENSG00000175206	5.43694	1	0.549506	0.530647
Heart	GroupA	GO:0043270~positive regulation of ion transport	4	0.0356931	ENSG00000149596, ENSG00000077522, ENSG00000131981, ENSG00000175206	5.43694	1	0.549506	0.530647
Heart	GroupA	GO:0003073~regulation of systemic arterial blood pressure	3	0.0359761	ENSG00000129991, ENSG00000166833, ENSG00000175206	9.86991	1	0.549506	0.530647
Heart	GroupA	GO:0086067~AV node cell to bundle of His cell communication	2	0.0367226	ENSG00000151067, ENSG00000182963	52.6395	1	0.556421	0.537326
Heart	GroupA	GO:0045216~cell-cell junction organization	4	0.0378314	ENSG00000104332, ENSG00000077522, ENSG00000166689, ENSG00000182963	5.31224	1	0.568673	0.549157
Heart	GroupA	GO:0030036~actin cytoskeleton organization	6	0.0391665	ENSG00000104332, ENSG00000077522, ENSG00000111245, ENSG00000167549, ENSG00000154556, ENSG00000140795	3.14124	1	0.584106	0.56406
Heart	GroupA	GO:2001257~regulation of cation channel activity	3	0.0397772	ENSG00000149596, ENSG00000077522, ENSG00000175206	9.33927	1	0.588578	0.568379
Heart	GroupA	GO:0055065~metal ion homeostasis	6	0.0404614	ENSG00000129991, ENSG00000151067, ENSG00000141385, ENSG00000149596, ENSG00000133065, ENSG00000174437	3.11309	1	0.594061	0.573673
Heart	GroupA	GO:0014733~regulation of skeletal muscle adaptation	2	0.0432556	ENSG00000092054, ENSG00000174437	44.5411	1	0.630201	0.608574
Heart	GroupA	GO:0006874~cellular calcium ion homeostasis	5	0.0442171	ENSG00000129991, ENSG00000151067, ENSG00000141385, ENSG00000149596, ENSG00000174437	3.68343	1	0.639292	0.617352
Heart	GroupA	GO:0019932~second-messenger-mediated signaling	4	0.0446324	ENSG00000151067, ENSG00000174233, ENSG00000149596, ENSG00000174437	4.97025	1	0.640407	0.618429
Heart	GroupA	GO:0001568~blood vessel development	6	0.0453392	ENSG00000129991, ENSG00000113196, ENSG00000049323, ENSG00000112531, ENSG00000182963, ENSG00000133454	3.0158	1	0.640879	0.618884
Heart	GroupA	GO:1904064~positive regulation of cation transmembrane transport	3	0.045342	ENSG00000149596, ENSG00000077522, ENSG00000175206	8.68552	1	0.640879	0.618884
Heart	GroupA	GO:0090136~epithelial cell-cell adhesion	2	0.0465058	ENSG00000166689, ENSG00000112276	41.3596	1	0.647662	0.625435
Heart	GroupA	GO:1901018~positive regulation of potassium ion transmembrane transporter activity	2	0.0465058	ENSG00000077522, ENSG00000175206	41.3596	1	0.647662	0.625435
Heart	GroupA	GO:0090279~regulation of calcium ion import	3	0.0469821	ENSG00000151067, ENSG00000149596, ENSG00000131981	8.51521	1	0.649519	0.627228
Heart	GroupA	GO:0001558~regulation of cell growth	5	0.0477241	ENSG00000104332, ENSG00000166313, ENSG00000170801, ENSG00000111245, ENSG00000175206	3.59203	1	0.654067	0.63162
Heart	GroupA	GO:0045926~negative regulation of growth	4	0.0480017	ENSG00000104332, ENSG00000166313, ENSG00000111245, ENSG00000175206	4.82529	1	0.654067	0.63162
Heart	GroupA	GO:0055074~calcium ion homeostasis	5	0.0484437	ENSG00000129991, ENSG00000151067, ENSG00000141385, ENSG00000149596, ENSG00000174437	3.57429	1	0.655374	0.632882
Heart	GroupA	GO:0001976~neurological system process involved in regulation of systemic arterial blood pressure	2	0.0497451	ENSG00000129991, ENSG00000166833	38.6023	1	0.668207	0.645275
Heart	GroupA	GO:0090101~negative regulation of transmembrane receptor protein serine/threonine kinase signaling pathway	3	0.0503269	ENSG00000104332, ENSG00000170801, ENSG00000049323	8.19388	1	0.671261	0.648224
Heart	GroupA	GO:0034330~cell junction organization	4	0.0525135	ENSG00000104332, ENSG00000077522, ENSG00000166689, ENSG00000182963	4.65088	1	0.691945	0.668198
Heart	GroupA	GO:0086064~cell communication by electrical coupling involved in cardiac conduction	2	0.0529736	ENSG00000151067, ENSG00000182963	36.1897	1	0.691945	0.668198
Heart	GroupA	GO:0055003~cardiac myofibril assembly	2	0.0529736	ENSG00000111245, ENSG00000140795	36.1897	1	0.691945	0.668198
Heart	GroupA	GO:0086026~atrial cardiac muscle cell to AV node cell signaling	2	0.0561913	ENSG00000151067, ENSG00000182963	34.0609	1	0.719097	0.694419
Heart	GroupA	GO:0086014~atrial cardiac muscle cell action potential	2	0.0561913	ENSG00000151067, ENSG00000182963	34.0609	1	0.719097	0.694419
Heart	GroupA	GO:0071380~cellular response to prostaglandin E stimulus	2	0.0561913	ENSG00000104332, ENSG00000174233	34.0609	1	0.719097	0.694419
Heart	GroupA	GO:0034767~positive regulation of ion transmembrane transport	3	0.0581544	ENSG00000149596, ENSG00000077522, ENSG00000175206	7.55262	1	0.739224	0.713854
Heart	GroupA	GO:0086066~atrial cardiac muscle cell to AV node cell communication	2	0.0593983	ENSG00000151067, ENSG00000182963	32.1686	1	0.750003	0.724263
Heart	GroupA	GO:1903169~regulation of calcium ion transmembrane transport	3	0.0599482	ENSG00000151067, ENSG00000149596, ENSG00000175206	7.42352	1	0.751933	0.726127
Heart	GroupA	GO:0016049~cell growth	5	0.0603702	ENSG00000104332, ENSG00000166313, ENSG00000111245, ENSG00000154556, ENSG00000175206	3.32015	1	0.752244	0.726428
Heart	GroupA	GO:0019725~cellular homeostasis	7	0.0622897	ENSG00000129991, ENSG00000151067, ENSG00000141385, ENSG00000149596, ENSG00000114923, ENSG00000133065, ENSG00000174437	2.43292	1	0.759962	0.733881
Heart	GroupA	GO:0003298~physiological muscle hypertrophy	2	0.0625946	ENSG00000154556, ENSG00000175206	30.4755	1	0.759962	0.733881
Heart	GroupA	GO:0061049~cell growth involved in cardiac muscle cell development	2	0.0625946	ENSG00000154556, ENSG00000175206	30.4755	1	0.759962	0.733881
Heart	GroupA	GO:0003301~physiological cardiac muscle hypertrophy	2	0.0625946	ENSG00000154556, ENSG00000175206	30.4755	1	0.759962	0.733881
Heart	GroupA	GO:0048878~chemical homeostasis	8	0.063426	ENSG00000129991, ENSG00000151067, ENSG00000141385, ENSG00000174233, ENSG00000149596, ENSG00000114923, ENSG00000133065, ENSG00000174437	2.20795	1	0.762306	0.736145
Heart	GroupA	GO:0034764~positive regulation of transmembrane transport	3	0.0635926	ENSG00000149596, ENSG00000077522, ENSG00000175206	7.17811	1	0.762306	0.736145
Heart	GroupA	GO:0043501~skeletal muscle adaptation	2	0.0689552	ENSG00000092054, ENSG00000174437	27.5731	1	0.819112	0.791001
Heart	GroupA	GO:0090288~negative regulation of cellular response to growth factor stimulus	3	0.0691964	ENSG00000104332, ENSG00000170801, ENSG00000049323	6.83899	1	0.819112	0.791001
Heart	GroupA	GO:0040008~regulation of growth	6	0.0697149	ENSG00000104332, ENSG00000166313, ENSG00000141385, ENSG00000170801, ENSG00000111245, ENSG00000175206	2.66427	1	0.820124	0.791978
Heart	GroupA	GO:0001508~action potential	3	0.0739864	ENSG00000151067, ENSG00000182963, ENSG00000174437	6.57994	1	0.858841	0.829367
Heart	GroupA	GO:0060401~cytosolic calcium ion transport	3	0.074957	ENSG00000151067, ENSG00000149596, ENSG00000174437	6.53046	1	0.858841	0.829367
Heart	GroupA	GO:0009117~nucleotide metabolic process	6	0.0752495	ENSG00000092054, ENSG00000077009, ENSG00000174233, ENSG00000109193, ENSG00000023228, ENSG00000175206	2.60435	1	0.858841	0.829367
Heart	GroupA	GO:0010460~positive regulation of heart rate	2	0.0752733	ENSG00000174437, ENSG00000175206	25.1754	1	0.858841	0.829367
Heart	GroupA	GO:0010882~regulation of cardiac muscle contraction by calcium ion signaling	2	0.0752733	ENSG00000151067, ENSG00000174437	25.1754	1	0.858841	0.829367
Heart	GroupA	GO:0032989~cellular component morphogenesis	9	0.076501	ENSG00000104332, ENSG00000166313, ENSG00000141385, ENSG00000077522, ENSG00000111245, ENSG00000023902, ENSG00000151640, ENSG00000112276, ENSG00000140795	1.97249	1	0.867623	0.837847
Heart	GroupA	GO:0006753~nucleoside phosphate metabolic process	6	0.0782979	ENSG00000092054, ENSG00000077009, ENSG00000174233, ENSG00000109193, ENSG00000023228, ENSG00000175206	2.57349	1	0.878823	0.848662
Heart	GroupA	GO:0071379~cellular response to prostaglandin stimulus	2	0.0784166	ENSG00000104332, ENSG00000174233	24.1264	1	0.878823	0.848662
Heart	GroupA	GO:0034695~response to prostaglandin E	2	0.0815494	ENSG00000104332, ENSG00000174233	23.1614	1	0.903243	0.872244
Heart	GroupA	GO:0060740~prostate gland epithelium morphogenesis	2	0.0815494	ENSG00000104332, ENSG00000169018	23.1614	1	0.903243	0.872244
Heart	GroupA	GO:0048514~blood vessel morphogenesis	5	0.0850302	ENSG00000129991, ENSG00000113196, ENSG00000112531, ENSG00000182963, ENSG00000133454	2.94824	1	0.936321	0.904187
Heart	GroupA	GO:0060512~prostate gland morphogenesis	2	0.0877835	ENSG00000104332, ENSG00000169018	21.4457	1	0.944671	0.91225
Heart	GroupA	GO:0098901~regulation of cardiac muscle cell action potential	2	0.0877835	ENSG00000151067, ENSG00000174437	21.4457	1	0.944671	0.91225
Heart	GroupA	GO:1901381~positive regulation of potassium ion transmembrane transport	2	0.0877835	ENSG00000077522, ENSG00000175206	21.4457	1	0.944671	0.91225
Heart	GroupA	GO:0010644~cell communication by electrical coupling	2	0.0877835	ENSG00000151067, ENSG00000182963	21.4457	1	0.944671	0.91225
Heart	GroupA	GO:0019722~calcium-mediated signaling	3	0.088962	ENSG00000151067, ENSG00000149596, ENSG00000174437	5.90852	1	0.951944	0.919274
Heart	GroupA	GO:0086019~cell-cell signaling involved in cardiac conduction	2	0.090885	ENSG00000151067, ENSG00000182963	20.6798	1	0.967057	0.933869
Heart	GroupA	GO:0070296~sarcoplasmic reticulum calcium ion transport	2	0.0939761	ENSG00000151067, ENSG00000174437	19.9667	1	0.994362	0.960237
Heart	GroupA	GO:0040007~growth	7	0.095046	ENSG00000104332, ENSG00000166313, ENSG00000141385, ENSG00000170801, ENSG00000111245, ENSG00000154556, ENSG00000175206	2.17449	1	1	0.965773
Heart	GroupA	GO:0009150~purine ribonucleotide metabolic process	5	0.0997583	ENSG00000092054, ENSG00000174233, ENSG00000109193, ENSG00000023228, ENSG00000175206	2.78382	1	1	0.966191
Heart	GroupB	GO:0006936~muscle contraction	29	2.44455e-14	ENSG00000080709, ENSG00000130037, ENSG00000198125, ENSG00000118194, ENSG00000198523, ENSG00000171385, ENSG00000198626, ENSG00000057294, ENSG00000155657, ENSG00000130176, ENSG00000159173, ENSG00000163380, ENSG00000141052, ENSG00000184185, ENSG00000158022, ENSG00000180509, ENSG00000130528, ENSG00000164532, ENSG00000035403, ENSG00000013016, ENSG00000109846, ENSG00000105409, ENSG00000129170, ENSG0000…	6.20761	9.05431e-11	9.06195e-11	8.76127e-11
Heart	GroupB	GO:0003012~muscle system process	31	9.26162e-14	ENSG00000080709, ENSG00000130037, ENSG00000198125, ENSG00000118194, ENSG00000198523, ENSG00000204472, ENSG00000171385, ENSG00000156804, ENSG00000198626, ENSG00000057294, ENSG00000155657, ENSG00000130176, ENSG00000159173, ENSG00000163380, ENSG00000141052, ENSG00000184185, ENSG00000158022, ENSG00000180509, ENSG00000130528, ENSG00000164532, ENSG00000035403, ENSG00000013016, ENSG00000109846, ENSG0000…	5.42326	3.43241e-10	1.71664e-10	1.65968e-10
Heart	GroupB	GO:0006941~striated muscle contraction	19	1.24017e-11	ENSG00000080709, ENSG00000130037, ENSG00000198125, ENSG00000118194, ENSG00000198523, ENSG00000171385, ENSG00000105409, ENSG00000129170, ENSG00000198626, ENSG00000057294, ENSG00000155657, ENSG00000152413, ENSG00000159173, ENSG00000180509, ENSG00000130528, ENSG00000183023, ENSG00000118729, ENSG00000182533, ENSG00000013016	8.36145	4.59733e-08	1.53244e-08	1.48159e-08
Heart	GroupB	GO:0060048~cardiac muscle contraction	16	1.35107e-10	ENSG00000080709, ENSG00000130037, ENSG00000118194, ENSG00000198523, ENSG00000171385, ENSG00000105409, ENSG00000129170, ENSG00000198626, ENSG00000057294, ENSG00000155657, ENSG00000159173, ENSG00000180509, ENSG00000130528, ENSG00000183023, ENSG00000118729, ENSG00000182533	9.44698	5.00841e-07	1.2521e-07	1.21056e-07
Heart	GroupB	GO:0061061~muscle structure development	32	2.42187e-10	ENSG00000157119, ENSG00000133424, ENSG00000073711, ENSG00000104369, ENSG00000176697, ENSG00000179388, ENSG00000118194, ENSG00000134775, ENSG00000198626, ENSG00000057294, ENSG00000135424, ENSG00000155657, ENSG00000100628, ENSG00000159173, ENSG00000163380, ENSG00000141052, ENSG00000162614, ENSG00000164532, ENSG00000109846, ENSG00000129170, ENSG00000115884, ENSG00000136842, ENSG00000152413, ENSG0000…	3.84936	8.97788e-07	1.79558e-07	1.736e-07
Heart	GroupB	GO:0060047~heart contraction	20	1.86577e-09	ENSG00000080709, ENSG00000130037, ENSG00000099337, ENSG00000118194, ENSG00000198523, ENSG00000171385, ENSG00000105409, ENSG00000129170, ENSG00000198626, ENSG00000057294, ENSG00000155657, ENSG00000159173, ENSG00000121577, ENSG00000184185, ENSG00000180509, ENSG00000130528, ENSG00000183023, ENSG00000118729, ENSG00000182533, ENSG00000013016	5.78386	6.91638e-06	1.15273e-06	1.11449e-06
Heart	GroupB	GO:0003015~heart process	20	2.29428e-09	ENSG00000080709, ENSG00000130037, ENSG00000099337, ENSG00000118194, ENSG00000198523, ENSG00000171385, ENSG00000105409, ENSG00000129170, ENSG00000198626, ENSG00000057294, ENSG00000155657, ENSG00000159173, ENSG00000121577, ENSG00000184185, ENSG00000180509, ENSG00000130528, ENSG00000183023, ENSG00000118729, ENSG00000182533, ENSG00000013016	5.7139	8.50487e-06	1.21499e-06	1.17467e-06
Heart	GroupB	GO:0061337~cardiac conduction	13	1.11604e-08	ENSG00000080709, ENSG00000130037, ENSG00000099337, ENSG00000198523, ENSG00000171385, ENSG00000105409, ENSG00000198626, ENSG00000057294, ENSG00000184185, ENSG00000180509, ENSG00000130528, ENSG00000183023, ENSG00000118729	9.49567	4.13709e-05	4.69118e-06	4.53553e-06
Heart	GroupB	GO:0044057~regulation of system process	27	1.13894e-08	ENSG00000080709, ENSG00000130037, ENSG00000118194, ENSG00000198523, ENSG00000204472, ENSG00000171385, ENSG00000156804, ENSG00000198626, ENSG00000057294, ENSG00000130176, ENSG00000159173, ENSG00000141052, ENSG00000184185, ENSG00000158022, ENSG00000180509, ENSG00000130528, ENSG00000013016, ENSG00000099337, ENSG00000105409, ENSG00000120937, ENSG00000129170, ENSG00000121577, ENSG00000121671, ENSG0000…	3.79566	4.22198e-05	4.69118e-06	4.53553e-06
Heart	GroupB	GO:0008016~regulation of heart contraction	18	3.37924e-08	ENSG00000080709, ENSG00000130037, ENSG00000099337, ENSG00000118194, ENSG00000198523, ENSG00000171385, ENSG00000105409, ENSG00000129170, ENSG00000198626, ENSG00000057294, ENSG00000121577, ENSG00000184185, ENSG00000180509, ENSG00000130528, ENSG00000183023, ENSG00000118729, ENSG00000182533, ENSG00000013016	5.47357	0.000125261	1.25269e-05	1.21112e-05
Heart	GroupB	GO:0014706~striated muscle tissue development	21	1.20458e-07	ENSG00000157119, ENSG00000118194, ENSG00000198523, ENSG00000129170, ENSG00000134775, ENSG00000198626, ENSG00000057294, ENSG00000155657, ENSG00000152413, ENSG00000115641, ENSG00000100628, ENSG00000159173, ENSG00000141052, ENSG00000183023, ENSG00000124743, ENSG00000162614, ENSG00000078328, ENSG00000123358, ENSG00000164532, ENSG00000182533, ENSG00000103034	4.25114	0.000446438	4.05944e-05	3.92474e-05
Heart	GroupB	GO:0090257~regulation of muscle system process	16	1.35608e-07	ENSG00000118194, ENSG00000198523, ENSG00000204472, ENSG00000156804, ENSG00000198626, ENSG00000057294, ENSG00000130176, ENSG00000159173, ENSG00000141052, ENSG00000158022, ENSG00000130528, ENSG00000183023, ENSG00000118729, ENSG00000182533, ENSG00000167657, ENSG00000013016	5.72544	0.000502573	4.18916e-05	4.05016e-05
Heart	GroupB	GO:1903522~regulation of blood circulation	19	2.57472e-07	ENSG00000080709, ENSG00000130037, ENSG00000099337, ENSG00000118194, ENSG00000198523, ENSG00000171385, ENSG00000105409, ENSG00000120937, ENSG00000129170, ENSG00000198626, ENSG00000057294, ENSG00000121577, ENSG00000184185, ENSG00000180509, ENSG00000130528, ENSG00000183023, ENSG00000118729, ENSG00000182533, ENSG00000013016	4.48731	0.000953994	6.85087e-05	6.62356e-05
Heart	GroupB	GO:0060537~muscle tissue development	21	2.58733e-07	ENSG00000157119, ENSG00000118194, ENSG00000198523, ENSG00000129170, ENSG00000134775, ENSG00000198626, ENSG00000057294, ENSG00000155657, ENSG00000152413, ENSG00000115641, ENSG00000100628, ENSG00000159173, ENSG00000141052, ENSG00000183023, ENSG00000124743, ENSG00000162614, ENSG00000078328, ENSG00000123358, ENSG00000164532, ENSG00000182533, ENSG00000103034	4.05422	0.000958663	6.85087e-05	6.62356e-05
Heart	GroupB	GO:0048738~cardiac muscle tissue development	15	3.8766e-07	ENSG00000118194, ENSG00000198523, ENSG00000129170, ENSG00000134775, ENSG00000198626, ENSG00000057294, ENSG00000155657, ENSG00000115641, ENSG00000159173, ENSG00000141052, ENSG00000183023, ENSG00000162614, ENSG00000164532, ENSG00000182533, ENSG00000103034	5.7139	0.00143602	9.58037e-05	9.26249e-05
Heart	GroupB	GO:0055002~striated muscle cell development	13	4.52548e-07	ENSG00000157119, ENSG00000129170, ENSG00000134775, ENSG00000155657, ENSG00000115884, ENSG00000136842, ENSG00000152413, ENSG00000115641, ENSG00000163380, ENSG00000183023, ENSG00000118729, ENSG00000162614, ENSG00000182533	6.82282	0.00167619	0.00010485	0.000101371
Heart	GroupB	GO:0002027~regulation of heart rate	11	6.54016e-07	ENSG00000130037, ENSG00000121577, ENSG00000180509, ENSG00000183023, ENSG00000130528, ENSG00000198523, ENSG00000171385, ENSG00000118729, ENSG00000198626, ENSG00000057294, ENSG00000182533	8.47147	0.0024215	0.000142614	0.000137882
Heart	GroupB	GO:0008015~blood circulation	24	7.95636e-07	ENSG00000080709, ENSG00000130037, ENSG00000099337, ENSG00000118194, ENSG00000198523, ENSG00000171385, ENSG00000105409, ENSG00000120937, ENSG00000129170, ENSG00000198626, ENSG00000057294, ENSG00000155657, ENSG00000159173, ENSG00000121577, ENSG00000226306, ENSG00000184185, ENSG00000180509, ENSG00000130528, ENSG00000183023, ENSG00000118729, ENSG00000164532, ENSG00000108576, ENSG00000182533, ENSG0000…	3.36058	0.00294508	0.000163857	0.00015842
Heart	GroupB	GO:0003013~circulatory system process	24	9.06635e-07	ENSG00000080709, ENSG00000130037, ENSG00000099337, ENSG00000118194, ENSG00000198523, ENSG00000171385, ENSG00000105409, ENSG00000120937, ENSG00000129170, ENSG00000198626, ENSG00000057294, ENSG00000155657, ENSG00000159173, ENSG00000121577, ENSG00000226306, ENSG00000184185, ENSG00000180509, ENSG00000130528, ENSG00000183023, ENSG00000118729, ENSG00000164532, ENSG00000108576, ENSG00000182533, ENSG0000…	3.33423	0.00335525	0.000176889	0.00017102
Heart	GroupB	GO:0007517~muscle organ development	20	1.0809e-06	ENSG00000109846, ENSG00000157119, ENSG00000133424, ENSG00000104369, ENSG00000179388, ENSG00000118194, ENSG00000129170, ENSG00000198626, ENSG00000057294, ENSG00000155657, ENSG00000135424, ENSG00000152413, ENSG00000100628, ENSG00000159173, ENSG00000141052, ENSG00000124743, ENSG00000078328, ENSG00000123358, ENSG00000164532, ENSG00000182533	3.87171	0.00399889	0.000200345	0.000193698
Heart	GroupB	GO:0035637~multicellular organismal signaling	13	1.21558e-06	ENSG00000080709, ENSG00000130037, ENSG00000099337, ENSG00000198523, ENSG00000171385, ENSG00000105409, ENSG00000198626, ENSG00000057294, ENSG00000184185, ENSG00000180509, ENSG00000130528, ENSG00000183023, ENSG00000118729	6.22351	0.00449601	0.000200477	0.000193825
Heart	GroupB	GO:0072359~circulatory system development	34	1.24386e-06	ENSG00000213145, ENSG00000105997, ENSG00000179388, ENSG00000198125, ENSG00000118194, ENSG00000136235, ENSG00000198523, ENSG00000134775, ENSG00000198626, ENSG00000057294, ENSG00000155657, ENSG00000159173, ENSG00000141052, ENSG00000160293, ENSG00000140545, ENSG00000162614, ENSG00000164532, ENSG00000105991, ENSG00000103034, ENSG00000110955, ENSG00000132329, ENSG00000076555, ENSG00000138448, ENSG0000…	2.54918	0.00460036	0.000200477	0.000193825
Heart	GroupB	GO:0072358~cardiovascular system development	34	1.24386e-06	ENSG00000213145, ENSG00000105997, ENSG00000179388, ENSG00000198125, ENSG00000118194, ENSG00000136235, ENSG00000198523, ENSG00000134775, ENSG00000198626, ENSG00000057294, ENSG00000155657, ENSG00000159173, ENSG00000141052, ENSG00000160293, ENSG00000140545, ENSG00000162614, ENSG00000164532, ENSG00000105991, ENSG00000103034, ENSG00000110955, ENSG00000132329, ENSG00000076555, ENSG00000138448, ENSG0000…	2.54918	0.00460036	0.000200477	0.000193825
Heart	GroupB	GO:0055001~muscle cell development	13	1.40195e-06	ENSG00000157119, ENSG00000129170, ENSG00000134775, ENSG00000155657, ENSG00000115884, ENSG00000136842, ENSG00000152413, ENSG00000115641, ENSG00000163380, ENSG00000183023, ENSG00000118729, ENSG00000162614, ENSG00000182533	6.14053	0.00518356	0.000211065	0.000204062
Heart	GroupB	GO:0070252~actin-mediated cell contraction	11	1.42342e-06	ENSG00000080709, ENSG00000130037, ENSG00000159173, ENSG00000118194, ENSG00000180509, ENSG00000171385, ENSG00000198626, ENSG00000057294, ENSG00000155657, ENSG00000182533, ENSG00000136842	7.79376	0.00526273	0.000211065	0.000204062
Heart	GroupB	GO:0006937~regulation of muscle contraction	13	1.50429e-06	ENSG00000118194, ENSG00000198523, ENSG00000198626, ENSG00000057294, ENSG00000130176, ENSG00000159173, ENSG00000141052, ENSG00000130528, ENSG00000183023, ENSG00000118729, ENSG00000182533, ENSG00000167657, ENSG00000013016	6.09987	0.00556089	0.000214477	0.000207361
Heart	GroupB	GO:0030048~actin filament-based movement	12	2.60278e-06	ENSG00000080709, ENSG00000130037, ENSG00000159173, ENSG00000118194, ENSG00000180509, ENSG00000198523, ENSG00000171385, ENSG00000198626, ENSG00000057294, ENSG00000155657, ENSG00000182533, ENSG00000136842	6.44112	0.00960212	0.000348996	0.000337416
Heart	GroupB	GO:0051146~striated muscle cell differentiation	16	2.63606e-06	ENSG00000157119, ENSG00000176697, ENSG00000129170, ENSG00000134775, ENSG00000155657, ENSG00000115884, ENSG00000136842, ENSG00000152413, ENSG00000115641, ENSG00000170558, ENSG00000163380, ENSG00000141052, ENSG00000183023, ENSG00000118729, ENSG00000162614, ENSG00000182533	4.53455	0.00972431	0.000348996	0.000337416
Heart	GroupB	GO:0009888~tissue development	49	4.61756e-06	ENSG00000157119, ENSG00000154122, ENSG00000133424, ENSG00000073711, ENSG00000113739, ENSG00000213145, ENSG00000105997, ENSG00000118194, ENSG00000198626, ENSG00000155657, ENSG00000100628, ENSG00000159173, ENSG00000141052, ENSG00000164532, ENSG00000035403, ENSG00000221818, ENSG00000109107, ENSG00000138448, ENSG00000129170, ENSG00000152413, ENSG00000125812, ENSG00000078328, ENSG00000123358, ENSG0000…	1.97709	0.0169717	0.000590251	0.000570666
Heart	GroupB	GO:0048856~anatomical structure development	110	8.29904e-06	ENSG00000157119, ENSG00000154122, ENSG00000133424, ENSG00000213145, ENSG00000073711, ENSG00000105997, ENSG00000149573, ENSG00000179388, ENSG00000198626, ENSG00000138675, ENSG00000100628, ENSG00000080371, ENSG00000151929, ENSG00000085662, ENSG00000141052, ENSG00000107371, ENSG00000124678, ENSG00000105991, ENSG00000013016, ENSG00000109158, ENSG00000076555, ENSG00000197763, ENSG00000138448, ENSG0000…	1.42404	0.0302962	0.00102548	0.000991458
Heart	GroupB	GO:0044707~single-multicellular organism process	117	8.6484e-06	ENSG00000157119, ENSG00000130037, ENSG00000154122, ENSG00000133424, ENSG00000213145, ENSG00000073711, ENSG00000105997, ENSG00000179388, ENSG00000171385, ENSG00000198626, ENSG00000138675, ENSG00000100628, ENSG00000080371, ENSG00000151929, ENSG00000085662, ENSG00000184185, ENSG00000141052, ENSG00000107371, ENSG00000124678, ENSG00000105991, ENSG00000013016, ENSG00000109158, ENSG00000076555, ENSG0000…	1.39487	0.0315513	0.00103418	0.000999867
Heart	GroupB	GO:0030029~actin filament-based process	26	9.29115e-06	ENSG00000080709, ENSG00000130037, ENSG00000118194, ENSG00000198523, ENSG00000204472, ENSG00000171385, ENSG00000134775, ENSG00000198626, ENSG00000057294, ENSG00000155657, ENSG00000130176, ENSG00000172159, ENSG00000171877, ENSG00000159173, ENSG00000163380, ENSG00000180509, ENSG00000119729, ENSG00000129170, ENSG00000136842, ENSG00000197747, ENSG00000163171, ENSG00000112290, ENSG00000118729, ENSG0000…	2.74131	0.0338561	0.00107632	0.00104061
Heart	GroupB	GO:0042692~muscle cell differentiation	18	1.51057e-05	ENSG00000157119, ENSG00000176697, ENSG00000129170, ENSG00000134775, ENSG00000155657, ENSG00000115884, ENSG00000136842, ENSG00000152413, ENSG00000115641, ENSG00000170558, ENSG00000100628, ENSG00000163380, ENSG00000141052, ENSG00000183023, ENSG00000118729, ENSG00000162614, ENSG00000182533, ENSG00000124882	3.52304	0.0544582	0.00169687	0.00164057
Heart	GroupB	GO:0044699~single-organism process	213	1.95516e-05	ENSG00000214114, ENSG00000157119, ENSG00000213145, ENSG00000179388, ENSG00000151929, ENSG00000085662, ENSG00000184185, ENSG00000184983, ENSG00000124678, ENSG00000013016, ENSG00000109158, ENSG00000156011, ENSG00000173175, ENSG00000158435, ENSG00000135697, ENSG00000058056, ENSG00000138162, ENSG00000163492, ENSG00000123358, ENSG00000078328, ENSG00000121057, ENSG00000103994, ENSG00000176697, ENSG0000…	1.12817	0.0699144	0.0021317	0.00206097
Heart	GroupB	GO:0048731~system development	90	2.27671e-05	ENSG00000157119, ENSG00000154122, ENSG00000133424, ENSG00000073711, ENSG00000113739, ENSG00000213145, ENSG00000105997, ENSG00000179388, ENSG00000118194, ENSG00000205683, ENSG00000134313, ENSG00000106809, ENSG00000198626, ENSG00000138675, ENSG00000155657, ENSG00000187098, ENSG00000100628, ENSG00000159173, ENSG00000080371, ENSG00000151929, ENSG00000085662, ENSG00000141052, ENSG00000160293, ENSG0000…	1.48607	0.0809351	0.00241136	0.00233135
Heart	GroupB	GO:0086002~cardiac muscle cell action potential involved in contraction	7	2.4842e-05	ENSG00000080709, ENSG00000130037, ENSG00000180509, ENSG00000171385, ENSG00000198626, ENSG00000057294, ENSG00000182533	11.8087	0.0879775	0.00255804	0.00247316
Heart	GroupB	GO:0006942~regulation of striated muscle contraction	9	3.03911e-05	ENSG00000159173, ENSG00000183023, ENSG00000130528, ENSG00000198523, ENSG00000118729, ENSG00000198626, ENSG00000057294, ENSG00000182533, ENSG00000013016	7.32955	0.106547	0.00304486	0.00294383
Heart	GroupB	GO:0098660~inorganic ion transmembrane transport	26	3.33529e-05	ENSG00000080709, ENSG00000130037, ENSG00000154122, ENSG00000104369, ENSG00000198523, ENSG00000171385, ENSG00000198626, ENSG00000184185, ENSG00000180509, ENSG00000130528, ENSG00000013016, ENSG00000109158, ENSG00000110955, ENSG00000099337, ENSG00000138448, ENSG00000105409, ENSG00000152234, ENSG00000112992, ENSG00000174502, ENSG00000143324, ENSG00000189043, ENSG00000183023, ENSG00000118729, ENSG0000…	2.54091	0.116303	0.00319061	0.00308475
Heart	GroupB	GO:0032502~developmental process	110	3.35673e-05	ENSG00000157119, ENSG00000154122, ENSG00000133424, ENSG00000213145, ENSG00000073711, ENSG00000105997, ENSG00000149573, ENSG00000179388, ENSG00000198626, ENSG00000138675, ENSG00000100628, ENSG00000080371, ENSG00000151929, ENSG00000085662, ENSG00000141052, ENSG00000107371, ENSG00000124678, ENSG00000105991, ENSG00000013016, ENSG00000109158, ENSG00000076555, ENSG00000197763, ENSG00000138448, ENSG0000…	1.38383	0.117005	0.00319061	0.00308475
Heart	GroupB	GO:0086001~cardiac muscle cell action potential	8	3.44908e-05	ENSG00000080709, ENSG00000130037, ENSG00000180509, ENSG00000183023, ENSG00000171385, ENSG00000198626, ENSG00000057294, ENSG00000182533	8.72029	0.120023	0.00319643	0.00309038
Heart	GroupB	GO:0034220~ion transmembrane transport	31	3.57641e-05	ENSG00000080709, ENSG00000130037, ENSG00000154122, ENSG00000104369, ENSG00000198523, ENSG00000171385, ENSG00000198626, ENSG00000184185, ENSG00000180509, ENSG00000130528, ENSG00000013016, ENSG00000109158, ENSG00000110955, ENSG00000099337, ENSG00000076555, ENSG00000138448, ENSG00000105409, ENSG00000152234, ENSG00000112992, ENSG00000152413, ENSG00000174502, ENSG00000143324, ENSG00000189043, ENSG0000…	2.28081	0.124167	0.0032336	0.0031263
Heart	GroupB	GO:0031032~actomyosin structure organization	11	4.39389e-05	ENSG00000171877, ENSG00000163380, ENSG00000118729, ENSG00000129170, ENSG00000134775, ENSG00000130176, ENSG00000155657, ENSG00000182533, ENSG00000136842, ENSG00000172159, ENSG00000197747	5.30187	0.150311	0.00384456	0.003717
Heart	GroupB	GO:0007275~multicellular organism development	98	4.45957e-05	ENSG00000157119, ENSG00000154122, ENSG00000133424, ENSG00000213145, ENSG00000073711, ENSG00000105997, ENSG00000179388, ENSG00000198626, ENSG00000138675, ENSG00000100628, ENSG00000080371, ENSG00000151929, ENSG00000085662, ENSG00000141052, ENSG00000107371, ENSG00000124678, ENSG00000105991, ENSG00000109158, ENSG00000076555, ENSG00000197763, ENSG00000138448, ENSG00000129170, ENSG00000134762, ENSG0000…	1.42373	0.152377	0.00384456	0.003717
Heart	GroupB	GO:0044767~single-organism developmental process	107	4.7805e-05	ENSG00000157119, ENSG00000154122, ENSG00000133424, ENSG00000213145, ENSG00000073711, ENSG00000105997, ENSG00000179388, ENSG00000198626, ENSG00000138675, ENSG00000100628, ENSG00000080371, ENSG00000151929, ENSG00000085662, ENSG00000141052, ENSG00000107371, ENSG00000124678, ENSG00000105991, ENSG00000013016, ENSG00000109158, ENSG00000076555, ENSG00000197763, ENSG00000138448, ENSG00000129170, ENSG0000…	1.38469	0.162402	0.00395041	0.00381933
Heart	GroupB	GO:0086065~cell communication involved in cardiac conduction	7	4.79548e-05	ENSG00000080709, ENSG00000130037, ENSG00000183023, ENSG00000118729, ENSG00000105409, ENSG00000198626, ENSG00000057294	10.5525	0.162867	0.00395041	0.00381933
Heart	GroupB	GO:0010959~regulation of metal ion transport	16	5.28608e-05	ENSG00000080709, ENSG00000130037, ENSG00000113739, ENSG00000106633, ENSG00000104369, ENSG00000198523, ENSG00000198626, ENSG00000057294, ENSG00000152413, ENSG00000180509, ENSG00000165912, ENSG00000130528, ENSG00000183023, ENSG00000118729, ENSG00000182533, ENSG00000013016	3.52061	0.177955	0.00425989	0.00411855
Heart	GroupB	GO:0006811~ion transport	40	6.84222e-05	ENSG00000080709, ENSG00000130037, ENSG00000176273, ENSG00000154122, ENSG00000113739, ENSG00000104369, ENSG00000198523, ENSG00000171385, ENSG00000198626, ENSG00000057294, ENSG00000154269, ENSG00000184185, ENSG00000180509, ENSG00000130528, ENSG00000013016, ENSG00000109158, ENSG00000110955, ENSG00000106633, ENSG00000132329, ENSG00000099337, ENSG00000076555, ENSG00000138448, ENSG00000105409, ENSG0000…	1.94382	0.224037	0.00539662	0.00521756
Heart	GroupB	GO:0055117~regulation of cardiac muscle contraction	8	8.01039e-05	ENSG00000183023, ENSG00000130528, ENSG00000198523, ENSG00000118729, ENSG00000198626, ENSG00000057294, ENSG00000182533, ENSG00000013016	7.65971	0.256924	0.00618635	0.00598109
Heart	GroupB	GO:0044763~single-organism cellular process	198	8.98577e-05	ENSG00000157119, ENSG00000213145, ENSG00000179388, ENSG00000151929, ENSG00000085662, ENSG00000184185, ENSG00000184983, ENSG00000124678, ENSG00000013016, ENSG00000109158, ENSG00000156011, ENSG00000173175, ENSG00000158435, ENSG00000135697, ENSG00000058056, ENSG00000138162, ENSG00000163492, ENSG00000123358, ENSG00000078328, ENSG00000121057, ENSG00000103994, ENSG00000176697, ENSG00000198125, ENSG0000…	1.14464	0.283314	0.00679801	0.00657245
Heart	GroupB	GO:0030239~myofibril assembly	7	9.55756e-05	ENSG00000163380, ENSG00000118729, ENSG00000129170, ENSG00000134775, ENSG00000155657, ENSG00000182533, ENSG00000136842	9.35785	0.298347	0.00708598	0.00685086
Heart	GroupB	GO:0006812~cation transport	30	0.000110152	ENSG00000080709, ENSG00000130037, ENSG00000176273, ENSG00000113739, ENSG00000104369, ENSG00000198523, ENSG00000171385, ENSG00000198626, ENSG00000057294, ENSG00000184185, ENSG00000180509, ENSG00000130528, ENSG00000013016, ENSG00000110955, ENSG00000106633, ENSG00000132329, ENSG00000099337, ENSG00000138448, ENSG00000105409, ENSG00000152234, ENSG00000112992, ENSG00000152413, ENSG00000189043, ENSG0000…	2.18007	0.335258	0.00800655	0.00774089
Heart	GroupB	GO:0043269~regulation of ion transport	21	0.000113751	ENSG00000080709, ENSG00000130037, ENSG00000113739, ENSG00000106633, ENSG00000104369, ENSG00000099337, ENSG00000198523, ENSG00000171385, ENSG00000198626, ENSG00000057294, ENSG00000152413, ENSG00000184185, ENSG00000180509, ENSG00000121671, ENSG00000165912, ENSG00000130528, ENSG00000183023, ENSG00000118729, ENSG00000182255, ENSG00000182533, ENSG00000013016	2.68574	0.344069	0.00810913	0.00784007
Heart	GroupB	GO:0086003~cardiac muscle cell contraction	7	0.000117898	ENSG00000080709, ENSG00000130037, ENSG00000180509, ENSG00000171385, ENSG00000198626, ENSG00000057294, ENSG00000182533	9.01757	0.354077	0.00811439	0.00784515
Heart	GroupB	GO:0010035~response to inorganic substance	19	0.00011823	ENSG00000109846, ENSG00000130037, ENSG00000213145, ENSG00000064012, ENSG00000198125, ENSG00000118194, ENSG00000197586, ENSG00000197763, ENSG00000198523, ENSG00000196139, ENSG00000198626, ENSG00000155657, ENSG00000115884, ENSG00000152413, ENSG00000085662, ENSG00000165140, ENSG00000183023, ENSG00000118729, ENSG00000162882	2.87035	0.35487	0.00811439	0.00784515
Heart	GroupB	GO:0010881~regulation of cardiac muscle contraction by regulation of the release of sequestered calcium ion	5	0.000124875	ENSG00000183023, ENSG00000130528, ENSG00000198523, ENSG00000118729, ENSG00000198626	18.6453	0.370569	0.00811439	0.00784515
Heart	GroupB	GO:0035994~response to muscle stretch	5	0.000124875	ENSG00000183023, ENSG00000129170, ENSG00000198626, ENSG00000155657, ENSG00000182533	18.6453	0.370569	0.00811439	0.00784515
Heart	GroupB	GO:0032501~multicellular organismal process	128	0.000126745	ENSG00000157119, ENSG00000130037, ENSG00000214114, ENSG00000154122, ENSG00000133424, ENSG00000213145, ENSG00000073711, ENSG00000105997, ENSG00000179388, ENSG00000171385, ENSG00000198626, ENSG00000138675, ENSG00000100628, ENSG00000080371, ENSG00000151929, ENSG00000085662, ENSG00000184185, ENSG00000141052, ENSG00000107371, ENSG00000124678, ENSG00000105991, ENSG00000013016, ENSG00000109158, ENSG0000…	1.29061	0.374918	0.00811439	0.00784515
Heart	GroupB	GO:0009653~anatomical structure morphogenesis	60	0.000126958	ENSG00000073711, ENSG00000213145, ENSG00000105997, ENSG00000149573, ENSG00000179388, ENSG00000118194, ENSG00000134313, ENSG00000106809, ENSG00000198626, ENSG00000155657, ENSG00000159173, ENSG00000080371, ENSG00000141052, ENSG00000160293, ENSG00000119729, ENSG00000164532, ENSG00000035403, ENSG00000105991, ENSG00000013016, ENSG00000138448, ENSG00000129170, ENSG00000163171, ENSG00000125812, ENSG0000…	1.61579	0.375413	0.00811439	0.00784515
Heart	GroupB	GO:0055013~cardiac muscle cell development	7	0.000158937	ENSG00000183023, ENSG00000129170, ENSG00000162614, ENSG00000134775, ENSG00000155657, ENSG00000182533, ENSG00000115641	8.55114	0.445245	0.00998612	0.00965478
Heart	GroupB	GO:0042391~regulation of membrane potential	16	0.000182183	ENSG00000080709, ENSG00000130037, ENSG00000099337, ENSG00000132429, ENSG00000198523, ENSG00000080854, ENSG00000171385, ENSG00000105409, ENSG00000198626, ENSG00000057294, ENSG00000174502, ENSG00000180509, ENSG00000183023, ENSG00000118729, ENSG00000182533, ENSG00000013016	3.14899	0.491054	0.0112559	0.0108824
Heart	GroupB	GO:0055006~cardiac cell development	7	0.000210527	ENSG00000183023, ENSG00000129170, ENSG00000162614, ENSG00000134775, ENSG00000155657, ENSG00000182533, ENSG00000115641	8.13059	0.541827	0.0127939	0.0123694
Heart	GroupB	GO:0098662~inorganic cation transmembrane transport	22	0.000255699	ENSG00000110955, ENSG00000080709, ENSG00000130037, ENSG00000104369, ENSG00000099337, ENSG00000198523, ENSG00000138448, ENSG00000171385, ENSG00000105409, ENSG00000198626, ENSG00000152234, ENSG00000112992, ENSG00000189043, ENSG00000184185, ENSG00000180509, ENSG00000130528, ENSG00000183023, ENSG00000118729, ENSG00000182255, ENSG00000126267, ENSG00000182533, ENSG00000013016	2.45473	0.612484	0.0152883	0.0147811
Heart	GroupB	GO:0010882~regulation of cardiac muscle contraction by calcium ion signaling	5	0.000272963	ENSG00000183023, ENSG00000130528, ENSG00000198523, ENSG00000118729, ENSG00000198626	15.4027	0.636513	0.0158105	0.0152859
Heart	GroupB	GO:0086005~ventricular cardiac muscle cell action potential	5	0.000272963	ENSG00000180509, ENSG00000171385, ENSG00000198626, ENSG00000057294, ENSG00000182533	15.4027	0.636513	0.0158105	0.0152859
Heart	GroupB	GO:0009141~nucleoside triphosphate metabolic process	14	0.000307851	ENSG00000110955, ENSG00000109107, ENSG00000106633, ENSG00000067057, ENSG00000114956, ENSG00000152234, ENSG00000154269, ENSG00000189043, ENSG00000187097, ENSG00000128609, ENSG00000165140, ENSG00000119729, ENSG00000184983, ENSG00000126267	3.33984	0.680622	0.0174398	0.0168612
Heart	GroupB	GO:0051239~regulation of multicellular organismal process	59	0.000310501	ENSG00000130037, ENSG00000154122, ENSG00000073711, ENSG00000113739, ENSG00000179388, ENSG00000118194, ENSG00000171385, ENSG00000204472, ENSG00000134313, ENSG00000106809, ENSG00000198626, ENSG00000187098, ENSG00000159173, ENSG00000080371, ENSG00000184185, ENSG00000141052, ENSG00000160293, ENSG00000107371, ENSG00000164532, ENSG00000013016, ENSG00000076555, ENSG00000064012, ENSG00000099337, ENSG0000…	1.57213	0.683745	0.0174398	0.0168612
Heart	GroupB	GO:0007507~heart development	19	0.000336541	ENSG00000213145, ENSG00000076555, ENSG00000198125, ENSG00000118194, ENSG00000198523, ENSG00000129170, ENSG00000134775, ENSG00000198626, ENSG00000057294, ENSG00000155657, ENSG00000115641, ENSG00000159173, ENSG00000141052, ENSG00000135074, ENSG00000183023, ENSG00000162614, ENSG00000164532, ENSG00000182533, ENSG00000103034	2.63443	0.712855	0.0186202	0.0180024
Heart	GroupB	GO:0014808~release of sequestered calcium ion into cytosol by sarcoplasmic reticulum	5	0.000381443	ENSG00000183023, ENSG00000130528, ENSG00000198523, ENSG00000118729, ENSG00000198626	14.1705	0.7569	0.0204929	0.0198129
Heart	GroupB	GO:1903514~calcium ion transport from endoplasmic reticulum to cytosol	5	0.000381443	ENSG00000183023, ENSG00000130528, ENSG00000198523, ENSG00000118729, ENSG00000198626	14.1705	0.7569	0.0204929	0.0198129
Heart	GroupB	GO:0098655~cation transmembrane transport	23	0.000391431	ENSG00000110955, ENSG00000080709, ENSG00000130037, ENSG00000104369, ENSG00000099337, ENSG00000198523, ENSG00000138448, ENSG00000171385, ENSG00000105409, ENSG00000198626, ENSG00000152234, ENSG00000112992, ENSG00000152413, ENSG00000189043, ENSG00000184185, ENSG00000180509, ENSG00000130528, ENSG00000183023, ENSG00000118729, ENSG00000182255, ENSG00000126267, ENSG00000182533, ENSG00000013016	2.31807	0.765739	0.0207291	0.0200413
Heart	GroupB	GO:1903779~regulation of cardiac conduction	7	0.000414024	ENSG00000183023, ENSG00000130528, ENSG00000198523, ENSG00000118729, ENSG00000105409, ENSG00000198626, ENSG00000013016	7.18792	0.784567	0.0216167	0.0208995
Heart	GroupB	GO:0055007~cardiac muscle cell differentiation	8	0.00043529	ENSG00000141052, ENSG00000183023, ENSG00000129170, ENSG00000162614, ENSG00000134775, ENSG00000155657, ENSG00000182533, ENSG00000115641	5.84349	0.800904	0.0223719	0.0216296
Heart	GroupB	GO:0010880~regulation of release of sequestered calcium ion into cytosol by sarcoplasmic reticulum	5	0.000445858	ENSG00000183023, ENSG00000130528, ENSG00000198523, ENSG00000118729, ENSG00000198626	13.6254	0.808557	0.0223719	0.0216296
Heart	GroupB	GO:0034765~regulation of ion transmembrane transport	16	0.000450619	ENSG00000080709, ENSG00000130037, ENSG00000104369, ENSG00000099337, ENSG00000198523, ENSG00000171385, ENSG00000198626, ENSG00000152413, ENSG00000184185, ENSG00000180509, ENSG00000130528, ENSG00000183023, ENSG00000118729, ENSG00000182255, ENSG00000182533, ENSG00000013016	2.89193	0.811907	0.0223719	0.0216296
Heart	GroupB	GO:1901657~glycosyl compound metabolic process	17	0.000452629	ENSG00000110955, ENSG00000075239, ENSG00000109107, ENSG00000106633, ENSG00000067057, ENSG00000112667, ENSG00000114956, ENSG00000196139, ENSG00000152234, ENSG00000189043, ENSG00000187097, ENSG00000085662, ENSG00000128609, ENSG00000165140, ENSG00000119729, ENSG00000184983, ENSG00000126267	2.76894	0.813304	0.0223719	0.0216296
Heart	GroupB	GO:0009144~purine nucleoside triphosphate metabolic process	13	0.000517241	ENSG00000110955, ENSG00000109107, ENSG00000106633, ENSG00000067057, ENSG00000114956, ENSG00000152234, ENSG00000189043, ENSG00000187097, ENSG00000128609, ENSG00000165140, ENSG00000119729, ENSG00000184983, ENSG00000126267	3.36161	0.853086	0.024922	0.024095
Heart	GroupB	GO:0010644~cell communication by electrical coupling	5	0.000517667	ENSG00000183023, ENSG00000130528, ENSG00000105409, ENSG00000198626, ENSG00000057294	13.1208	0.853318	0.024922	0.024095
Heart	GroupB	GO:0015672~monovalent inorganic cation transport	18	0.000534079	ENSG00000110955, ENSG00000080709, ENSG00000130037, ENSG00000099337, ENSG00000171385, ENSG00000105409, ENSG00000057294, ENSG00000152234, ENSG00000112992, ENSG00000189043, ENSG00000184185, ENSG00000180509, ENSG00000183023, ENSG00000118729, ENSG00000088386, ENSG00000182255, ENSG00000126267, ENSG00000182533	2.62416	0.86198	0.0253824	0.0245402
Heart	GroupB	GO:0035556~intracellular signal transduction	58	0.000543938	ENSG00000213145, ENSG00000204472, ENSG00000134313, ENSG00000008853, ENSG00000198626, ENSG00000138675, ENSG00000100628, ENSG00000080371, ENSG00000187097, ENSG00000166153, ENSG00000085662, ENSG00000165140, ENSG00000160293, ENSG00000119729, ENSG00000124678, ENSG00000184545, ENSG00000140563, ENSG00000156011, ENSG00000064012, ENSG00000173175, ENSG00000138448, ENSG00000153820, ENSG00000263155, ENSG0000…	1.54664	0.866936	0.0255238	0.0246769
Heart	GroupB	GO:1901019~regulation of calcium ion transmembrane transporter activity	7	0.000561163	ENSG00000104369, ENSG00000130528, ENSG00000198523, ENSG00000118729, ENSG00000198626, ENSG00000182533, ENSG00000013016	6.79406	0.875172	0.0260029	0.0251401
Heart	GroupB	GO:0090279~regulation of calcium ion import	8	0.000589803	ENSG00000104369, ENSG00000183023, ENSG00000130528, ENSG00000198523, ENSG00000118729, ENSG00000198626, ENSG00000182533, ENSG00000152413	5.55704	0.887752	0.0269926	0.026097
Heart	GroupB	GO:0086019~cell-cell signaling involved in cardiac conduction	5	0.000597334	ENSG00000080709, ENSG00000130037, ENSG00000118729, ENSG00000198626, ENSG00000057294	12.6522	0.890844	0.0270038	0.0261078
Heart	GroupB	GO:0051924~regulation of calcium ion transport	11	0.000637283	ENSG00000113739, ENSG00000104369, ENSG00000183023, ENSG00000165912, ENSG00000130528, ENSG00000198523, ENSG00000118729, ENSG00000198626, ENSG00000182533, ENSG00000152413, ENSG00000013016	3.82047	0.905878	0.0284628	0.0275184
Heart	GroupB	GO:0034762~regulation of transmembrane transport	16	0.000648859	ENSG00000080709, ENSG00000130037, ENSG00000104369, ENSG00000099337, ENSG00000198523, ENSG00000171385, ENSG00000198626, ENSG00000152413, ENSG00000184185, ENSG00000180509, ENSG00000130528, ENSG00000183023, ENSG00000118729, ENSG00000182255, ENSG00000182533, ENSG00000013016	2.79221	0.909834	0.0286348	0.0276846
Heart	GroupB	GO:0070296~sarcoplasmic reticulum calcium ion transport	5	0.000685326	ENSG00000183023, ENSG00000130528, ENSG00000198523, ENSG00000118729, ENSG00000198626	12.2159	0.921242	0.0298883	0.0288966
Heart	GroupB	GO:0006816~calcium ion transport	15	0.000755724	ENSG00000176273, ENSG00000113739, ENSG00000106633, ENSG00000104369, ENSG00000132329, ENSG00000198523, ENSG00000138448, ENSG00000198626, ENSG00000152413, ENSG00000165912, ENSG00000130528, ENSG00000183023, ENSG00000118729, ENSG00000182533, ENSG00000013016	2.88018	0.939343	0.0325752	0.0314943
Heart	GroupB	GO:1904062~regulation of cation transmembrane transport	11	0.000885355	ENSG00000080709, ENSG00000104369, ENSG00000180509, ENSG00000183023, ENSG00000130528, ENSG00000198523, ENSG00000118729, ENSG00000198626, ENSG00000182533, ENSG00000152413, ENSG00000013016	3.65904	0.962502	0.0375464	0.0363006
Heart	GroupB	GO:0055085~transmembrane transport	34	0.000891309	ENSG00000080709, ENSG00000130037, ENSG00000154122, ENSG00000104369, ENSG00000198523, ENSG00000171385, ENSG00000198626, ENSG00000184185, ENSG00000180509, ENSG00000130528, ENSG00000013016, ENSG00000109158, ENSG00000110955, ENSG00000135917, ENSG00000099337, ENSG00000076555, ENSG00000138448, ENSG00000105409, ENSG00000152234, ENSG00000112992, ENSG00000152413, ENSG00000174502, ENSG00000143324, ENSG0000…	1.82222	0.963321	0.0375464	0.0363006
Heart	GroupB	GO:0032970~regulation of actin filament-based process	14	0.000952261	ENSG00000118194, ENSG00000198523, ENSG00000129170, ENSG00000134775, ENSG00000198626, ENSG00000057294, ENSG00000136842, ENSG00000197747, ENSG00000163171, ENSG00000163380, ENSG00000112290, ENSG00000119729, ENSG00000182533, ENSG00000167657	2.96099	0.970745	0.0396633	0.0383472
Heart	GroupB	GO:0006461~protein complex assembly	36	0.00104875	ENSG00000130037, ENSG00000153132, ENSG00000075239, ENSG00000113615, ENSG00000124171, ENSG00000118194, ENSG00000198523, ENSG00000204472, ENSG00000171385, ENSG00000134775, ENSG00000155657, ENSG00000187098, ENSG00000168675, ENSG00000163380, ENSG00000165140, ENSG00000184185, ENSG00000005020, ENSG00000123545, ENSG00000184983, ENSG00000164532, ENSG00000013016, ENSG00000109846, ENSG00000064012, ENSG0000…	1.76518	0.97955	0.043197	0.0417637
Heart	GroupB	GO:0070271~protein complex biogenesis	36	0.00106149	ENSG00000130037, ENSG00000153132, ENSG00000075239, ENSG00000113615, ENSG00000124171, ENSG00000118194, ENSG00000198523, ENSG00000204472, ENSG00000171385, ENSG00000134775, ENSG00000155657, ENSG00000187098, ENSG00000168675, ENSG00000163380, ENSG00000165140, ENSG00000184185, ENSG00000005020, ENSG00000123545, ENSG00000184983, ENSG00000164532, ENSG00000013016, ENSG00000109846, ENSG00000064012, ENSG0000…	1.76396	0.980494	0.043241	0.0418062
Heart	GroupB	GO:0071804~cellular potassium ion transport	10	0.00110824	ENSG00000080709, ENSG00000130037, ENSG00000184185, ENSG00000099337, ENSG00000180509, ENSG00000171385, ENSG00000118729, ENSG00000182255, ENSG00000105409, ENSG00000182533	3.89298	0.983601	0.0441747	0.042709
Heart	GroupB	GO:0071805~potassium ion transmembrane transport	10	0.00110824	ENSG00000080709, ENSG00000130037, ENSG00000184185, ENSG00000099337, ENSG00000180509, ENSG00000171385, ENSG00000118729, ENSG00000182255, ENSG00000105409, ENSG00000182533	3.89298	0.983601	0.0441747	0.042709
Heart	GroupB	GO:0035995~detection of muscle stretch	3	0.00115837	ENSG00000129170, ENSG00000155657, ENSG00000182533	53.1392	0.986385	0.0452825	0.0437801
Heart	GroupB	GO:0030001~metal ion transport	24	0.00116046	ENSG00000080709, ENSG00000130037, ENSG00000176273, ENSG00000113739, ENSG00000106633, ENSG00000104369, ENSG00000132329, ENSG00000099337, ENSG00000198523, ENSG00000138448, ENSG00000171385, ENSG00000105409, ENSG00000198626, ENSG00000057294, ENSG00000152413, ENSG00000184185, ENSG00000180509, ENSG00000165912, ENSG00000130528, ENSG00000183023, ENSG00000118729, ENSG00000182255, ENSG00000182533, ENSG0000…	2.08901	0.98649	0.0452825	0.0437801
Heart	GroupB	GO:0099622~cardiac muscle cell membrane repolarization	5	0.00126663	ENSG00000080709, ENSG00000130037, ENSG00000180509, ENSG00000171385, ENSG00000182533	10.4195	0.99089	0.0489106	0.0472877
Heart	GroupB	GO:1903169~regulation of calcium ion transmembrane transport	8	0.00132686	ENSG00000104369, ENSG00000183023, ENSG00000130528, ENSG00000198523, ENSG00000118729, ENSG00000198626, ENSG00000182533, ENSG00000013016	4.8446	0.992715	0.0502	0.0485343
Heart	GroupB	GO:0016049~cell growth	16	0.00133165	ENSG00000109846, ENSG00000176697, ENSG00000112667, ENSG00000114999, ENSG00000138448, ENSG00000120937, ENSG00000106809, ENSG00000080371, ENSG00000187097, ENSG00000141052, ENSG00000165140, ENSG00000012232, ENSG00000182533, ENSG00000035403, ENSG00000053108, ENSG00000103034	2.60009	0.992843	0.0502	0.0485343
Heart	GroupB	GO:0086064~cell communication by electrical coupling involved in cardiac conduction	4	0.00134065	ENSG00000183023, ENSG00000105409, ENSG00000198626, ENSG00000057294	17.7131	0.993079	0.0502	0.0485343
Heart	GroupB	GO:0006753~nucleoside phosphate metabolic process	21	0.00138823	ENSG00000110955, ENSG00000075239, ENSG00000109107, ENSG00000106633, ENSG00000132329, ENSG00000067057, ENSG00000112667, ENSG00000173175, ENSG00000114956, ENSG00000120937, ENSG00000152234, ENSG00000112992, ENSG00000154269, ENSG00000189043, ENSG00000187097, ENSG00000128609, ENSG00000165140, ENSG00000119729, ENSG00000184983, ENSG00000162882, ENSG00000126267	2.20429	0.994199	0.0508105	0.0491246
Heart	GroupB	GO:0051592~response to calcium ion	8	0.001394	ENSG00000118194, ENSG00000197586, ENSG00000118729, ENSG00000196139, ENSG00000198626, ENSG00000155657, ENSG00000115884, ENSG00000152413	4.80355	0.994322	0.0508105	0.0491246
Heart	GroupB	GO:0023051~regulation of signaling	63	0.00140799	ENSG00000130037, ENSG00000073711, ENSG00000134313, ENSG00000008853, ENSG00000198626, ENSG00000138675, ENSG00000187097, ENSG00000085662, ENSG00000165140, ENSG00000141052, ENSG00000005020, ENSG00000160293, ENSG00000119729, ENSG00000164532, ENSG00000184545, ENSG00000013016, ENSG00000106633, ENSG00000156011, ENSG00000064012, ENSG00000173175, ENSG00000138448, ENSG00000058091, ENSG00000153820, ENSG0000…	1.45397	0.994609	0.0508105	0.0491246
Heart	GroupB	GO:0010038~response to metal ion	13	0.00142263	ENSG00000213145, ENSG00000064012, ENSG00000118194, ENSG00000197586, ENSG00000198523, ENSG00000196139, ENSG00000198626, ENSG00000155657, ENSG00000115884, ENSG00000152413, ENSG00000165140, ENSG00000118729, ENSG00000162882	2.99052	0.994895	0.0508105	0.0491246
Heart	GroupB	GO:0051260~protein homooligomerization	12	0.0014392	ENSG00000109846, ENSG00000130037, ENSG00000075239, ENSG00000184185, ENSG00000165140, ENSG00000076555, ENSG00000198523, ENSG00000171385, ENSG00000182255, ENSG00000108576, ENSG00000145861, ENSG00000013016	3.18437	0.995199	0.0508105	0.0491246
Heart	GroupB	GO:0009205~purine ribonucleoside triphosphate metabolic process	12	0.0014392	ENSG00000110955, ENSG00000106633, ENSG00000109107, ENSG00000189043, ENSG00000187097, ENSG00000128609, ENSG00000165140, ENSG00000067057, ENSG00000119729, ENSG00000184983, ENSG00000126267, ENSG00000152234	3.18437	0.995199	0.0508105	0.0491246
Heart	GroupB	GO:0009123~nucleoside monophosphate metabolic process	13	0.00154955	ENSG00000110955, ENSG00000109107, ENSG00000106633, ENSG00000067057, ENSG00000112667, ENSG00000114956, ENSG00000152234, ENSG00000189043, ENSG00000187097, ENSG00000128609, ENSG00000165140, ENSG00000184983, ENSG00000126267	2.96167	0.996813	0.0541904	0.0523924
Heart	GroupB	GO:0046128~purine ribonucleoside metabolic process	14	0.00163551	ENSG00000110955, ENSG00000075239, ENSG00000109107, ENSG00000106633, ENSG00000067057, ENSG00000114956, ENSG00000152234, ENSG00000189043, ENSG00000187097, ENSG00000128609, ENSG00000165140, ENSG00000119729, ENSG00000184983, ENSG00000126267	2.78633	0.997684	0.056662	0.0547819
Heart	GroupB	GO:0035051~cardiocyte differentiation	8	0.00168953	ENSG00000141052, ENSG00000183023, ENSG00000129170, ENSG00000162614, ENSG00000134775, ENSG00000155657, ENSG00000182533, ENSG00000115641	4.64605	0.998105	0.0579916	0.0560674
Heart	GroupB	GO:0009199~ribonucleoside triphosphate metabolic process	12	0.00171551	ENSG00000110955, ENSG00000106633, ENSG00000109107, ENSG00000189043, ENSG00000187097, ENSG00000128609, ENSG00000165140, ENSG00000067057, ENSG00000119729, ENSG00000184983, ENSG00000126267, ENSG00000152234	3.11439	0.998279	0.0583432	0.0564073
Heart	GroupB	GO:0086009~membrane repolarization	5	0.00174546	ENSG00000080709, ENSG00000130037, ENSG00000180509, ENSG00000171385, ENSG00000182533	9.57464	0.99846	0.0587301	0.0567814
Heart	GroupB	GO:0055008~cardiac muscle tissue morphogenesis	6	0.00177269	ENSG00000159173, ENSG00000118194, ENSG00000164532, ENSG00000198626, ENSG00000057294, ENSG00000155657	6.85668	0.998608	0.0587301	0.0567814
Heart	GroupB	GO:0042278~purine nucleoside metabolic process	14	0.00177442	ENSG00000110955, ENSG00000075239, ENSG00000109107, ENSG00000106633, ENSG00000067057, ENSG00000114956, ENSG00000152234, ENSG00000189043, ENSG00000187097, ENSG00000128609, ENSG00000165140, ENSG00000119729, ENSG00000184983, ENSG00000126267	2.76304	0.998617	0.0587301	0.0567814
Heart	GroupB	GO:0009719~response to endogenous stimulus	37	0.00180541	ENSG00000103994, ENSG00000075239, ENSG00000113739, ENSG00000179388, ENSG00000198125, ENSG00000134452, ENSG00000198523, ENSG00000204472, ENSG00000156804, ENSG00000134313, ENSG00000198626, ENSG00000138675, ENSG00000168675, ENSG00000085662, ENSG00000141052, ENSG00000158022, ENSG00000180509, ENSG00000119729, ENSG00000138829, ENSG00000106633, ENSG00000068078, ENSG00000173175, ENSG00000105409, ENSG0000…	1.6935	0.998767	0.0592269	0.0572617
Heart	GroupB	GO:0019637~organophosphate metabolic process	29	0.00186567	ENSG00000075239, ENSG00000067057, ENSG00000112667, ENSG00000138675, ENSG00000154269, ENSG00000187097, ENSG00000165140, ENSG00000160293, ENSG00000119729, ENSG00000184983, ENSG00000110955, ENSG00000106633, ENSG00000068078, ENSG00000155189, ENSG00000109107, ENSG00000132329, ENSG00000173175, ENSG00000114956, ENSG00000104879, ENSG00000120937, ENSG00000152234, ENSG00000112992, ENSG00000189043, ENSG0000…	1.85444	0.999015	0.0605799	0.0585698
Heart	GroupB	GO:0003008~system process	45	0.00187933	ENSG00000080709, ENSG00000130037, ENSG00000198125, ENSG00000118194, ENSG00000198523, ENSG00000204472, ENSG00000171385, ENSG00000156804, ENSG00000198626, ENSG00000057294, ENSG00000155657, ENSG00000130176, ENSG00000159173, ENSG00000163380, ENSG00000226306, ENSG00000141052, ENSG00000184185, ENSG00000158022, ENSG00000110080, ENSG00000180509, ENSG00000130528, ENSG00000164532, ENSG00000035403, ENSG0000…	1.5831	0.999063	0.0605799	0.0585698
Heart	GroupB	GO:0023052~signaling	111	0.00196186	ENSG00000130037, ENSG00000213145, ENSG00000073711, ENSG00000182836, ENSG00000179388, ENSG00000171385, ENSG00000198626, ENSG00000008853, ENSG00000138675, ENSG00000100628, ENSG00000080371, ENSG00000151929, ENSG00000119922, ENSG00000085662, ENSG00000165140, ENSG00000184185, ENSG00000141052, ENSG00000124678, ENSG00000013016, ENSG00000109158, ENSG00000156011, ENSG00000173175, ENSG00000138448, ENSG0000…	1.25633	0.999311	0.0626951	0.0606148
Heart	GroupB	GO:2001257~regulation of cation channel activity	7	0.00199191	ENSG00000104369, ENSG00000180509, ENSG00000130528, ENSG00000198523, ENSG00000118729, ENSG00000152413, ENSG00000013016	5.33297	0.999383	0.0631111	0.0610171
Heart	GroupB	GO:1903115~regulation of actin filament-based movement	5	0.00212666	ENSG00000118194, ENSG00000198523, ENSG00000198626, ENSG00000057294, ENSG00000182533	9.08363	0.999626	0.0664703	0.0642648
Heart	GroupB	GO:0044700~single organism signaling	110	0.00215637	ENSG00000130037, ENSG00000213145, ENSG00000073711, ENSG00000182836, ENSG00000179388, ENSG00000171385, ENSG00000198626, ENSG00000008853, ENSG00000138675, ENSG00000100628, ENSG00000080371, ENSG00000151929, ENSG00000119922, ENSG00000085662, ENSG00000165140, ENSG00000184185, ENSG00000141052, ENSG00000124678, ENSG00000109158, ENSG00000156011, ENSG00000173175, ENSG00000138448, ENSG00000153820, ENSG0000…	1.25564	0.999665	0.0664703	0.0642648
Heart	GroupB	GO:0014070~response to organic cyclic compound	25	0.0021619	ENSG00000075239, ENSG00000113739, ENSG00000198523, ENSG00000204472, ENSG00000156804, ENSG00000198626, ENSG00000158022, ENSG00000180509, ENSG00000109846, ENSG00000064012, ENSG00000076555, ENSG00000173175, ENSG00000105409, ENSG00000196139, ENSG00000115884, ENSG00000152413, ENSG00000115641, ENSG00000121671, ENSG00000183023, ENSG00000118729, ENSG00000155380, ENSG00000107263, ENSG00000123358, ENSG0000…	1.95509	0.999672	0.0664703	0.0642648
Heart	GroupB	GO:0030036~actin cytoskeleton organization	18	0.00218329	ENSG00000118194, ENSG00000204472, ENSG00000129170, ENSG00000134775, ENSG00000155657, ENSG00000130176, ENSG00000136842, ENSG00000197747, ENSG00000172159, ENSG00000171877, ENSG00000163171, ENSG00000163380, ENSG00000112290, ENSG00000119729, ENSG00000118729, ENSG00000182533, ENSG00000100592, ENSG00000167657	2.30622	0.999697	0.0664703	0.0642648
Heart	GroupB	GO:0009116~nucleoside metabolic process	15	0.00218758	ENSG00000110955, ENSG00000075239, ENSG00000109107, ENSG00000106633, ENSG00000067057, ENSG00000112667, ENSG00000114956, ENSG00000152234, ENSG00000189043, ENSG00000187097, ENSG00000128609, ENSG00000165140, ENSG00000119729, ENSG00000184983, ENSG00000126267	2.57333	0.999702	0.0664703	0.0642648
Heart	GroupB	GO:0046034~ATP metabolic process	11	0.00235909	ENSG00000110955, ENSG00000106633, ENSG00000109107, ENSG00000189043, ENSG00000187097, ENSG00000128609, ENSG00000165140, ENSG00000067057, ENSG00000184983, ENSG00000126267, ENSG00000152234	3.20731	0.999842	0.0710988	0.0687397
Heart	GroupB	GO:0070838~divalent metal ion transport	15	0.00244861	ENSG00000176273, ENSG00000113739, ENSG00000106633, ENSG00000104369, ENSG00000132329, ENSG00000198523, ENSG00000138448, ENSG00000198626, ENSG00000152413, ENSG00000165912, ENSG00000130528, ENSG00000183023, ENSG00000118729, ENSG00000182533, ENSG00000013016	2.54255	0.999887	0.0732017	0.0707728
Heart	GroupB	GO:0010646~regulation of cell communication	61	0.00255078	ENSG00000130037, ENSG00000073711, ENSG00000134313, ENSG00000008853, ENSG00000198626, ENSG00000138675, ENSG00000187097, ENSG00000085662, ENSG00000165140, ENSG00000141052, ENSG00000005020, ENSG00000160293, ENSG00000119729, ENSG00000164532, ENSG00000184545, ENSG00000106633, ENSG00000156011, ENSG00000064012, ENSG00000173175, ENSG00000138448, ENSG00000058091, ENSG00000153820, ENSG00000152413, ENSG0000…	1.43112	0.999923	0.075646	0.0731361
Heart	GroupB	GO:0072511~divalent inorganic cation transport	15	0.00259034	ENSG00000176273, ENSG00000113739, ENSG00000106633, ENSG00000104369, ENSG00000132329, ENSG00000198523, ENSG00000138448, ENSG00000198626, ENSG00000152413, ENSG00000165912, ENSG00000130528, ENSG00000183023, ENSG00000118729, ENSG00000182533, ENSG00000013016	2.52443	0.999933	0.0762095	0.0736809
Heart	GroupB	GO:0001508~action potential	8	0.00264256	ENSG00000080709, ENSG00000130037, ENSG00000180509, ENSG00000183023, ENSG00000171385, ENSG00000198626, ENSG00000057294, ENSG00000182533	4.29408	0.999945	0.0771338	0.0745744
Heart	GroupB	GO:1901135~carbohydrate derivative metabolic process	31	0.00270103	ENSG00000133424, ENSG00000075239, ENSG00000067057, ENSG00000112667, ENSG00000106809, ENSG00000100626, ENSG00000187097, ENSG00000085662, ENSG00000165140, ENSG00000110080, ENSG00000180509, ENSG00000119729, ENSG00000184983, ENSG00000110955, ENSG00000257594, ENSG00000106633, ENSG00000109107, ENSG00000154252, ENSG00000132329, ENSG00000173175, ENSG00000114956, ENSG00000120937, ENSG00000196139, ENSG0000…	1.76136	0.999956	0.0776794	0.075102
Heart	GroupB	GO:0032879~regulation of localization	52	0.00270317	ENSG00000130037, ENSG00000084090, ENSG00000073711, ENSG00000113739, ENSG00000113615, ENSG00000118194, ENSG00000171385, ENSG00000204472, ENSG00000198626, ENSG00000080371, ENSG00000184185, ENSG00000119729, ENSG00000035403, ENSG00000013016, ENSG00000106633, ENSG00000076555, ENSG00000064012, ENSG00000099337, ENSG00000173175, ENSG00000171033, ENSG00000138448, ENSG00000152413, ENSG00000165912, ENSG0000…	1.48982	0.999956	0.0776794	0.075102
Heart	GroupB	GO:0006091~generation of precursor metabolites and energy	14	0.00278814	ENSG00000110955, ENSG00000109107, ENSG00000106633, ENSG00000067057, ENSG00000112992, ENSG00000189043, ENSG00000187097, ENSG00000128609, ENSG00000165140, ENSG00000100412, ENSG00000184983, ENSG00000126267, ENSG00000145861, ENSG00000163754	2.61724	0.999968	0.0795049	0.0768669
Heart	GroupB	GO:0009117~nucleotide metabolic process	20	0.00281136	ENSG00000110955, ENSG00000075239, ENSG00000109107, ENSG00000106633, ENSG00000132329, ENSG00000067057, ENSG00000112667, ENSG00000173175, ENSG00000114956, ENSG00000120937, ENSG00000152234, ENSG00000112992, ENSG00000189043, ENSG00000187097, ENSG00000128609, ENSG00000165140, ENSG00000119729, ENSG00000184983, ENSG00000162882, ENSG00000126267	2.12451	0.999971	0.0795551	0.0769155
Heart	GroupB	GO:0086011~membrane repolarization during action potential	4	0.00302334	ENSG00000080709, ENSG00000130037, ENSG00000180509, ENSG00000171385	13.4957	0.999987	0.0842672	0.0814712
Heart	GroupB	GO:0086013~membrane repolarization during cardiac muscle cell action potential	4	0.00302334	ENSG00000080709, ENSG00000130037, ENSG00000180509, ENSG00000171385	13.4957	0.999987	0.0842672	0.0814712
Heart	GroupB	GO:0065008~regulation of biological quality	69	0.00304617	ENSG00000130037, ENSG00000176273, ENSG00000133424, ENSG00000113739, ENSG00000113615, ENSG00000118194, ENSG00000171385, ENSG00000198626, ENSG00000080371, ENSG00000151929, ENSG00000085662, ENSG00000160293, ENSG00000119729, ENSG00000107371, ENSG00000035403, ENSG00000013016, ENSG00000106633, ENSG00000076555, ENSG00000064012, ENSG00000099337, ENSG00000132429, ENSG00000173175, ENSG00000197763, ENSG0000…	1.37791	0.999988	0.0842699	0.0814738
Heart	GroupB	GO:0006813~potassium ion transport	10	0.00311012	ENSG00000080709, ENSG00000130037, ENSG00000184185, ENSG00000099337, ENSG00000180509, ENSG00000171385, ENSG00000118729, ENSG00000182255, ENSG00000105409, ENSG00000182533	3.34209	0.99999	0.0854017	0.082568
Heart	GroupB	GO:0009119~ribonucleoside metabolic process	14	0.00322395	ENSG00000110955, ENSG00000075239, ENSG00000109107, ENSG00000106633, ENSG00000067057, ENSG00000114956, ENSG00000152234, ENSG00000189043, ENSG00000187097, ENSG00000128609, ENSG00000165140, ENSG00000119729, ENSG00000184983, ENSG00000126267	2.57645	0.999994	0.0878763	0.0849606
Heart	GroupB	GO:0055086~nucleobase-containing small molecule metabolic process	21	0.00334118	ENSG00000110955, ENSG00000075239, ENSG00000109107, ENSG00000106633, ENSG00000132329, ENSG00000067057, ENSG00000112667, ENSG00000173175, ENSG00000114956, ENSG00000120937, ENSG00000152234, ENSG00000112992, ENSG00000154269, ENSG00000189043, ENSG00000187097, ENSG00000128609, ENSG00000165140, ENSG00000119729, ENSG00000184983, ENSG00000162882, ENSG00000126267	2.04382	0.999996	0.090407	0.0874073
Heart	GroupB	GO:0060415~muscle tissue morphogenesis	6	0.00363329	ENSG00000159173, ENSG00000118194, ENSG00000164532, ENSG00000198626, ENSG00000057294, ENSG00000155657	5.82348	0.999999	0.0968965	0.0936814
Heart	GroupB	GO:0051279~regulation of release of sequestered calcium ion into cytosol	6	0.00363329	ENSG00000104369, ENSG00000183023, ENSG00000130528, ENSG00000198523, ENSG00000118729, ENSG00000198626	5.82348	0.999999	0.0968965	0.0936814
Heart	GroupB	GO:0060538~skeletal muscle organ development	9	0.00373299	ENSG00000100628, ENSG00000157119, ENSG00000133424, ENSG00000141052, ENSG00000124743, ENSG00000129170, ENSG00000078328, ENSG00000123358, ENSG00000152413	3.58242	0.999999	0.0988442	0.0955645
Heart	GroupB	GO:0051049~regulation of transport	40	0.00389028	ENSG00000080709, ENSG00000130037, ENSG00000084090, ENSG00000113739, ENSG00000104369, ENSG00000113615, ENSG00000118194, ENSG00000198523, ENSG00000171385, ENSG00000198626, ENSG00000057294, ENSG00000080371, ENSG00000184185, ENSG00000180509, ENSG00000130528, ENSG00000119729, ENSG00000140545, ENSG00000103034, ENSG00000013016, ENSG00000109846, ENSG00000106633, ENSG00000064012, ENSG00000099337, ENSG0000…	1.578	0.999999	0.102278	0.0988847
Heart	GroupB	GO:0043266~regulation of potassium ion transport	6	0.00408172	ENSG00000080709, ENSG00000130037, ENSG00000106633, ENSG00000180509, ENSG00000118729, ENSG00000182533	5.66819	1	0.106556	0.10302
Heart	GroupB	GO:0044711~single-organism biosynthetic process	32	0.00411666	ENSG00000172292, ENSG00000133424, ENSG00000075239, ENSG00000138675, ENSG00000085662, ENSG00000165140, ENSG00000110080, ENSG00000110955, ENSG00000106633, ENSG00000068078, ENSG00000155189, ENSG00000109107, ENSG00000154252, ENSG00000132329, ENSG00000076555, ENSG00000173175, ENSG00000114956, ENSG00000120937, ENSG00000196139, ENSG00000152234, ENSG00000154930, ENSG00000135697, ENSG00000159063, ENSG0000…	1.692	1	0.106716	0.103176
Heart	GroupB	GO:0048659~smooth muscle cell proliferation	7	0.00439822	ENSG00000085662, ENSG00000204472, ENSG00000106809, ENSG00000130176, ENSG00000125257, ENSG00000124882, ENSG00000103034	4.55015	1	0.113224	0.109467
Heart	GroupB	GO:0006163~purine nucleotide metabolic process	17	0.00470402	ENSG00000110955, ENSG00000075239, ENSG00000109107, ENSG00000106633, ENSG00000132329, ENSG00000067057, ENSG00000173175, ENSG00000114956, ENSG00000120937, ENSG00000152234, ENSG00000189043, ENSG00000187097, ENSG00000128609, ENSG00000165140, ENSG00000119729, ENSG00000184983, ENSG00000126267	2.20199	1	0.119497	0.115532
Heart	GroupB	GO:0032412~regulation of ion transmembrane transporter activity	9	0.00470637	ENSG00000104369, ENSG00000180509, ENSG00000130528, ENSG00000198523, ENSG00000118729, ENSG00000198626, ENSG00000182533, ENSG00000152413, ENSG00000013016	3.44687	1	0.119497	0.115532
Heart	GroupB	GO:0086036~regulation of cardiac muscle cell membrane potential	3	0.0052084	ENSG00000198523, ENSG00000105409, ENSG00000013016	26.5696	1	0.130372	0.126047
Heart	GroupB	GO:0071313~cellular response to caffeine	3	0.0052084	ENSG00000183023, ENSG00000118729, ENSG00000198626	26.5696	1	0.130372	0.126047
Heart	GroupB	GO:0048660~regulation of smooth muscle cell proliferation	7	0.00524021	ENSG00000085662, ENSG00000204472, ENSG00000106809, ENSG00000130176, ENSG00000125257, ENSG00000124882, ENSG00000103034	4.38908	1	0.130372	0.126047
Heart	GroupB	GO:0048644~muscle organ morphogenesis	6	0.0053737	ENSG00000159173, ENSG00000118194, ENSG00000164532, ENSG00000198626, ENSG00000057294, ENSG00000155657	5.31392	1	0.132802	0.128396
Heart	GroupB	GO:0022898~regulation of transmembrane transporter activity	9	0.00550346	ENSG00000104369, ENSG00000180509, ENSG00000130528, ENSG00000198523, ENSG00000118729, ENSG00000198626, ENSG00000182533, ENSG00000152413, ENSG00000013016	3.35616	1	0.135108	0.130625
Heart	GroupB	GO:0051926~negative regulation of calcium ion transport	5	0.00566795	ENSG00000165912, ENSG00000130528, ENSG00000198523, ENSG00000118729, ENSG00000182533	6.94631	1	0.137463	0.132902
Heart	GroupB	GO:0007010~cytoskeleton organization	28	0.00567356	ENSG00000170390, ENSG00000176014, ENSG00000118194, ENSG00000204472, ENSG00000134775, ENSG00000057294, ENSG00000155657, ENSG00000130176, ENSG00000172159, ENSG00000171877, ENSG00000163380, ENSG00000182263, ENSG00000119729, ENSG00000109846, ENSG00000114999, ENSG00000129170, ENSG00000136842, ENSG00000197747, ENSG00000163171, ENSG00000138162, ENSG00000112290, ENSG00000118729, ENSG00000155380, ENSG0000…	1.73415	1	0.137463	0.132902
Heart	GroupB	GO:0048513~animal organ development	61	0.00572262	ENSG00000157119, ENSG00000154122, ENSG00000133424, ENSG00000073711, ENSG00000113739, ENSG00000213145, ENSG00000105997, ENSG00000179388, ENSG00000118194, ENSG00000198626, ENSG00000155657, ENSG00000187098, ENSG00000100628, ENSG00000159173, ENSG00000151929, ENSG00000085662, ENSG00000141052, ENSG00000164532, ENSG00000105991, ENSG00000221818, ENSG00000076555, ENSG00000064012, ENSG00000129170, ENSG0000…	1.38127	1	0.137752	0.133181
Heart	GroupB	GO:0043267~negative regulation of potassium ion transport	4	0.00624992	ENSG00000130037, ENSG00000180509, ENSG00000118729, ENSG00000182533	10.4966	1	0.148268	0.143348
Heart	GroupB	GO:0060314~regulation of ryanodine-sensitive calcium-release channel activity	4	0.00624992	ENSG00000104369, ENSG00000130528, ENSG00000198523, ENSG00000118729	10.4966	1	0.148268	0.143348
Heart	GroupB	GO:0040007~growth	24	0.00627948	ENSG00000109846, ENSG00000133424, ENSG00000113739, ENSG00000073711, ENSG00000068078, ENSG00000176697, ENSG00000112667, ENSG00000076555, ENSG00000114999, ENSG00000138448, ENSG00000120937, ENSG00000106809, ENSG00000080371, ENSG00000187097, ENSG00000141052, ENSG00000165140, ENSG00000012232, ENSG00000164532, ENSG00000108576, ENSG00000182533, ENSG00000124882, ENSG00000035403, ENSG00000053108, ENSG0000…	1.82452	1	0.148268	0.143348
Heart	GroupB	GO:0003205~cardiac chamber development	8	0.00636467	ENSG00000159173, ENSG00000141052, ENSG00000118194, ENSG00000164532, ENSG00000198626, ENSG00000057294, ENSG00000182533, ENSG00000115641	3.65689	1	0.148389	0.143465
Heart	GroupB	GO:0033002~muscle cell proliferation	8	0.00636467	ENSG00000085662, ENSG00000204472, ENSG00000164532, ENSG00000106809, ENSG00000130176, ENSG00000125257, ENSG00000124882, ENSG00000103034	3.65689	1	0.148389	0.143465
Heart	GroupB	GO:0003206~cardiac chamber morphogenesis	7	0.00645194	ENSG00000159173, ENSG00000118194, ENSG00000164532, ENSG00000198626, ENSG00000057294, ENSG00000182533, ENSG00000115641	4.2031	1	0.14919	0.14424
Heart	GroupB	GO:0071822~protein complex subunit organization	37	0.00647951	ENSG00000130037, ENSG00000153132, ENSG00000075239, ENSG00000113615, ENSG00000124171, ENSG00000118194, ENSG00000198523, ENSG00000204472, ENSG00000171385, ENSG00000134775, ENSG00000155657, ENSG00000187098, ENSG00000168675, ENSG00000163380, ENSG00000165140, ENSG00000184185, ENSG00000005020, ENSG00000123545, ENSG00000184983, ENSG00000164532, ENSG00000013016, ENSG00000109846, ENSG00000064012, ENSG0000…	1.56603	1	0.14919	0.14424
Heart	GroupB	GO:0071415~cellular response to purine-containing compound	3	0.00663471	ENSG00000183023, ENSG00000118729, ENSG00000198626	23.6174	1	0.15182	0.146783
Heart	GroupB	GO:0043271~negative regulation of ion transport	7	0.0067168	ENSG00000130037, ENSG00000180509, ENSG00000165912, ENSG00000130528, ENSG00000198523, ENSG00000118729, ENSG00000182533	4.16778	1	0.152756	0.147687
Heart	GroupB	GO:0009150~purine ribonucleotide metabolic process	16	0.00684384	ENSG00000110955, ENSG00000075239, ENSG00000109107, ENSG00000106633, ENSG00000132329, ENSG00000067057, ENSG00000173175, ENSG00000120937, ENSG00000152234, ENSG00000189043, ENSG00000187097, ENSG00000128609, ENSG00000165140, ENSG00000119729, ENSG00000184983, ENSG00000126267	2.18007	1	0.153758	0.148657
Heart	GroupB	GO:0071407~cellular response to organic cyclic compound	16	0.00684384	ENSG00000064012, ENSG00000173175, ENSG00000204472, ENSG00000156804, ENSG00000105409, ENSG00000196139, ENSG00000198626, ENSG00000115641, ENSG00000180509, ENSG00000121671, ENSG00000183023, ENSG00000118729, ENSG00000155380, ENSG00000107263, ENSG00000123358, ENSG00000108576	2.18007	1	0.153758	0.148657
Heart	GroupB	GO:0002026~regulation of the force of heart contraction	4	0.00692823	ENSG00000183023, ENSG00000198523, ENSG00000129170, ENSG00000198626	10.1218	1	0.154717	0.149583
Heart	GroupB	GO:0007154~cell communication	108	0.00699383	ENSG00000130037, ENSG00000213145, ENSG00000073711, ENSG00000182836, ENSG00000179388, ENSG00000198626, ENSG00000008853, ENSG00000138675, ENSG00000100628, ENSG00000080371, ENSG00000151929, ENSG00000119922, ENSG00000085662, ENSG00000165140, ENSG00000141052, ENSG00000124678, ENSG00000109158, ENSG00000156011, ENSG00000173175, ENSG00000138448, ENSG00000153820, ENSG00000158435, ENSG00000116991, ENSG0000…	1.21945	1	0.155246	0.150095
Heart	GroupB	GO:0051259~protein oligomerization	15	0.00708939	ENSG00000109846, ENSG00000130037, ENSG00000075239, ENSG00000076555, ENSG00000064012, ENSG00000118194, ENSG00000198523, ENSG00000171385, ENSG00000197747, ENSG00000184185, ENSG00000165140, ENSG00000182255, ENSG00000108576, ENSG00000145861, ENSG00000013016	2.2469	1	0.156431	0.15124
Heart	GroupB	GO:0009167~purine ribonucleoside monophosphate metabolic process	11	0.00720964	ENSG00000110955, ENSG00000106633, ENSG00000109107, ENSG00000189043, ENSG00000187097, ENSG00000128609, ENSG00000165140, ENSG00000067057, ENSG00000184983, ENSG00000126267, ENSG00000152234	2.73465	1	0.158143	0.152896
Heart	GroupB	GO:0072521~purine-containing compound metabolic process	17	0.00742077	ENSG00000110955, ENSG00000075239, ENSG00000109107, ENSG00000106633, ENSG00000132329, ENSG00000067057, ENSG00000173175, ENSG00000114956, ENSG00000120937, ENSG00000152234, ENSG00000189043, ENSG00000187097, ENSG00000128609, ENSG00000165140, ENSG00000119729, ENSG00000184983, ENSG00000126267	2.09476	1	0.161402	0.156047
Heart	GroupB	GO:0009126~purine nucleoside monophosphate metabolic process	11	0.00744532	ENSG00000110955, ENSG00000106633, ENSG00000109107, ENSG00000189043, ENSG00000187097, ENSG00000128609, ENSG00000165140, ENSG00000067057, ENSG00000184983, ENSG00000126267, ENSG00000152234	2.72509	1	0.161402	0.156047
Heart	GroupB	GO:0009612~response to mechanical stimulus	9	0.00766801	ENSG00000130037, ENSG00000151929, ENSG00000064012, ENSG00000079215, ENSG00000183023, ENSG00000129170, ENSG00000198626, ENSG00000155657, ENSG00000182533	3.17249	1	0.165264	0.15978
Heart	GroupB	GO:0046496~nicotinamide nucleotide metabolic process	7	0.00785553	ENSG00000106633, ENSG00000109107, ENSG00000187097, ENSG00000165140, ENSG00000067057, ENSG00000162882, ENSG00000112992	4.03225	1	0.167359	0.161806
Heart	GroupB	GO:0019362~pyridine nucleotide metabolic process	7	0.00785553	ENSG00000106633, ENSG00000109107, ENSG00000187097, ENSG00000165140, ENSG00000067057, ENSG00000162882, ENSG00000112992	4.03225	1	0.167359	0.161806
Heart	GroupB	GO:0010522~regulation of calcium ion transport into cytosol	6	0.00800354	ENSG00000104369, ENSG00000183023, ENSG00000130528, ENSG00000198523, ENSG00000118729, ENSG00000198626	4.83084	1	0.169538	0.163913
Heart	GroupB	GO:0051235~maintenance of location	11	0.00809213	ENSG00000138829, ENSG00000104369, ENSG00000076555, ENSG00000121671, ENSG00000183023, ENSG00000130528, ENSG00000198523, ENSG00000138448, ENSG00000118729, ENSG00000198626, ENSG00000198911	2.6875	1	0.170441	0.164785
Heart	GroupB	GO:0051481~negative regulation of cytosolic calcium ion concentration	3	0.00821695	ENSG00000130037, ENSG00000183023, ENSG00000130528	21.2557	1	0.172092	0.166382
Heart	GroupB	GO:0032409~regulation of transporter activity	9	0.00836158	ENSG00000104369, ENSG00000180509, ENSG00000130528, ENSG00000198523, ENSG00000118729, ENSG00000198626, ENSG00000182533, ENSG00000152413, ENSG00000013016	3.12584	1	0.174137	0.168359
Heart	GroupB	GO:0060306~regulation of membrane repolarization	4	0.00841151	ENSG00000130037, ENSG00000180509, ENSG00000118729, ENSG00000182533	9.44698	1	0.174198	0.168418
Heart	GroupB	GO:0051186~cofactor metabolic process	13	0.00847747	ENSG00000075239, ENSG00000109107, ENSG00000106633, ENSG00000067057, ENSG00000076555, ENSG00000196139, ENSG00000112992, ENSG00000154930, ENSG00000187097, ENSG00000085662, ENSG00000165140, ENSG00000162882, ENSG00000165996	2.39242	1	0.174589	0.168796
Heart	GroupB	GO:0090066~regulation of anatomical structure size	15	0.0087049	ENSG00000130037, ENSG00000176697, ENSG00000114999, ENSG00000120937, ENSG00000134775, ENSG00000136842, ENSG00000080371, ENSG00000163171, ENSG00000163380, ENSG00000112290, ENSG00000160293, ENSG00000183023, ENSG00000108576, ENSG00000182533, ENSG00000053108	2.19584	1	0.178282	0.172367
Heart	GroupB	GO:0009259~ribonucleotide metabolic process	16	0.00878697	ENSG00000110955, ENSG00000075239, ENSG00000109107, ENSG00000106633, ENSG00000132329, ENSG00000067057, ENSG00000173175, ENSG00000120937, ENSG00000152234, ENSG00000189043, ENSG00000187097, ENSG00000128609, ENSG00000165140, ENSG00000119729, ENSG00000184983, ENSG00000126267	2.11895	1	0.178974	0.173036
Heart	GroupB	GO:0050789~regulation of biological process	172	0.00883656	ENSG00000157119, ENSG00000130037, ENSG00000214114, ENSG00000154122, ENSG00000213145, ENSG00000073711, ENSG00000182836, ENSG00000105997, ENSG00000179388, ENSG00000171385, ENSG00000198626, ENSG00000008853, ENSG00000138675, ENSG00000100628, ENSG00000080371, ENSG00000151929, ENSG00000119922, ENSG00000085662, ENSG00000165140, ENSG00000184185, ENSG00000141052, ENSG00000107371, ENSG00000124678, ENSG0000…	1.11578	1	0.179001	0.173061
Heart	GroupB	GO:0065003~macromolecular complex assembly	37	0.00896462	ENSG00000130037, ENSG00000153132, ENSG00000075239, ENSG00000113615, ENSG00000124171, ENSG00000118194, ENSG00000198523, ENSG00000204472, ENSG00000171385, ENSG00000134775, ENSG00000155657, ENSG00000187098, ENSG00000168675, ENSG00000163380, ENSG00000165140, ENSG00000184185, ENSG00000005020, ENSG00000123545, ENSG00000184983, ENSG00000164532, ENSG00000013016, ENSG00000109846, ENSG00000064012, ENSG0000…	1.53306	1	0.180608	0.174615
Heart	GroupB	GO:0030154~cell differentiation	68	0.00936757	ENSG00000157119, ENSG00000073711, ENSG00000179388, ENSG00000134313, ENSG00000106809, ENSG00000138675, ENSG00000155657, ENSG00000187098, ENSG00000100628, ENSG00000080371, ENSG00000141052, ENSG00000124678, ENSG00000164532, ENSG00000035403, ENSG00000221818, ENSG00000109107, ENSG00000064012, ENSG00000197763, ENSG00000138448, ENSG00000129170, ENSG00000152413, ENSG00000058056, ENSG00000163694, ENSG0000…	1.31927	1	0.187706	0.181478
Heart	GroupB	GO:0009161~ribonucleoside monophosphate metabolic process	11	0.0095495	ENSG00000110955, ENSG00000106633, ENSG00000109107, ENSG00000189043, ENSG00000187097, ENSG00000128609, ENSG00000165140, ENSG00000067057, ENSG00000184983, ENSG00000126267, ENSG00000152234	2.62416	1	0.190323	0.184008
Heart	GroupB	GO:0065007~biological regulation	180	0.00978558	ENSG00000157119, ENSG00000130037, ENSG00000214114, ENSG00000154122, ENSG00000176273, ENSG00000133424, ENSG00000213145, ENSG00000073711, ENSG00000182836, ENSG00000105997, ENSG00000179388, ENSG00000171385, ENSG00000198626, ENSG00000008853, ENSG00000138675, ENSG00000100628, ENSG00000080371, ENSG00000151929, ENSG00000119922, ENSG00000085662, ENSG00000165140, ENSG00000184185, ENSG00000141052, ENSG0000…	1.10438	1	0.193004	0.1866
Heart	GroupB	GO:0048514~blood vessel morphogenesis	15	0.00978817	ENSG00000110955, ENSG00000105997, ENSG00000132329, ENSG00000179388, ENSG00000138448, ENSG00000120937, ENSG00000170558, ENSG00000141052, ENSG00000160293, ENSG00000140545, ENSG00000123358, ENSG00000164532, ENSG00000144476, ENSG00000124882, ENSG00000105991	2.16453	1	0.193004	0.1866
Heart	GroupB	GO:0006796~phosphate-containing compound metabolic process	59	0.00994019	ENSG00000073711, ENSG00000204472, ENSG00000134313, ENSG00000138675, ENSG00000155657, ENSG00000187097, ENSG00000165140, ENSG00000141052, ENSG00000160293, ENSG00000119729, ENSG00000184983, ENSG00000184545, ENSG00000106633, ENSG00000109107, ENSG00000173175, ENSG00000171033, ENSG00000138448, ENSG00000058091, ENSG00000112992, ENSG00000165752, ENSG00000128609, ENSG00000052795, ENSG00000107242, ENSG0000…	1.35592	1	0.194964	0.188495
Heart	GroupB	GO:0051148~negative regulation of muscle cell differentiation	5	0.01003	ENSG00000176697, ENSG00000141052, ENSG00000129170, ENSG00000182533, ENSG00000124882	5.90436	1	0.195389	0.188906
Heart	GroupB	GO:0045214~sarcomere organization	4	0.0100673	ENSG00000118729, ENSG00000134775, ENSG00000155657, ENSG00000182533	8.85654	1	0.195389	0.188906
Heart	GroupB	GO:0048869~cellular developmental process	73	0.0102143	ENSG00000157119, ENSG00000073711, ENSG00000179388, ENSG00000134313, ENSG00000106809, ENSG00000138675, ENSG00000155657, ENSG00000187098, ENSG00000100628, ENSG00000080371, ENSG00000141052, ENSG00000119729, ENSG00000124678, ENSG00000164532, ENSG00000035403, ENSG00000013016, ENSG00000221818, ENSG00000109107, ENSG00000064012, ENSG00000197763, ENSG00000138448, ENSG00000129170, ENSG00000152413, ENSG0000…	1.29565	1	0.197211	0.190668
Heart	GroupB	GO:0007519~skeletal muscle tissue development	8	0.0103289	ENSG00000100628, ENSG00000157119, ENSG00000141052, ENSG00000124743, ENSG00000129170, ENSG00000078328, ENSG00000123358, ENSG00000152413	3.33423	1	0.197597	0.191041
Heart	GroupB	GO:0006793~phosphorus metabolic process	59	0.0103409	ENSG00000073711, ENSG00000204472, ENSG00000134313, ENSG00000138675, ENSG00000155657, ENSG00000187097, ENSG00000165140, ENSG00000141052, ENSG00000160293, ENSG00000119729, ENSG00000184983, ENSG00000184545, ENSG00000106633, ENSG00000109107, ENSG00000173175, ENSG00000171033, ENSG00000138448, ENSG00000058091, ENSG00000112992, ENSG00000165752, ENSG00000128609, ENSG00000052795, ENSG00000107242, ENSG0000…	1.35328	1	0.197597	0.191041
Heart	GroupB	GO:0072524~pyridine-containing compound metabolic process	7	0.0105397	ENSG00000106633, ENSG00000109107, ENSG00000187097, ENSG00000165140, ENSG00000067057, ENSG00000162882, ENSG00000112992	3.786	1	0.200362	0.193714
Heart	GroupB	GO:0048638~regulation of developmental growth	11	0.0109204	ENSG00000080371, ENSG00000073711, ENSG00000068078, ENSG00000113739, ENSG00000176697, ENSG00000076555, ENSG00000114999, ENSG00000164532, ENSG00000108576, ENSG00000182533, ENSG00000053108	2.5722	1	0.206518	0.199666
Heart	GroupB	GO:0019693~ribose phosphate metabolic process	16	0.0109749	ENSG00000110955, ENSG00000075239, ENSG00000109107, ENSG00000106633, ENSG00000132329, ENSG00000067057, ENSG00000173175, ENSG00000120937, ENSG00000152234, ENSG00000189043, ENSG00000187097, ENSG00000128609, ENSG00000165140, ENSG00000119729, ENSG00000184983, ENSG00000126267	2.06491	1	0.206518	0.199666
Heart	GroupB	GO:0006928~movement of cell or subcellular component	38	0.0111191	ENSG00000080709, ENSG00000130037, ENSG00000073711, ENSG00000176697, ENSG00000179388, ENSG00000124171, ENSG00000118194, ENSG00000136235, ENSG00000198523, ENSG00000204472, ENSG00000171385, ENSG00000106809, ENSG00000198626, ENSG00000057294, ENSG00000155657, ENSG00000187098, ENSG00000159173, ENSG00000080371, ENSG00000168675, ENSG00000180509, ENSG00000160293, ENSG00000162614, ENSG00000164532, ENSG0000…	1.49994	1	0.208174	0.201267
Heart	GroupB	GO:0043502~regulation of muscle adaptation	5	0.0112282	ENSG00000159173, ENSG00000158022, ENSG00000204472, ENSG00000156804, ENSG00000182533	5.7139	1	0.20916	0.20222
Heart	GroupB	GO:0006090~pyruvate metabolic process	6	0.0119026	ENSG00000106633, ENSG00000109107, ENSG00000187097, ENSG00000165140, ENSG00000067057, ENSG00000155380	4.38262	1	0.220614	0.213294
Heart	GroupB	GO:0001944~vasculature development	17	0.0126035	ENSG00000110955, ENSG00000105997, ENSG00000132329, ENSG00000179388, ENSG00000136235, ENSG00000138448, ENSG00000120937, ENSG00000170558, ENSG00000141052, ENSG00000160293, ENSG00000140545, ENSG00000107263, ENSG00000123358, ENSG00000164532, ENSG00000144476, ENSG00000124882, ENSG00000105991	1.97457	1	0.232444	0.224731
Heart	GroupB	GO:0071312~cellular response to alkaloid	4	0.0128821	ENSG00000183023, ENSG00000204472, ENSG00000118729, ENSG00000198626	8.09741	1	0.234088	0.226321
Heart	GroupB	GO:0086091~regulation of heart rate by cardiac conduction	4	0.0128821	ENSG00000130037, ENSG00000180509, ENSG00000171385, ENSG00000057294	8.09741	1	0.234088	0.226321
Heart	GroupB	GO:0086004~regulation of cardiac muscle cell contraction	4	0.0128821	ENSG00000198523, ENSG00000198626, ENSG00000057294, ENSG00000182533	8.09741	1	0.234088	0.226321
Heart	GroupB	GO:0006096~glycolytic process	5	0.0131922	ENSG00000106633, ENSG00000109107, ENSG00000187097, ENSG00000165140, ENSG00000067057	5.45018	1	0.238553	0.230637
Heart	GroupB	GO:0006733~oxidoreduction coenzyme metabolic process	7	0.0138181	ENSG00000106633, ENSG00000109107, ENSG00000187097, ENSG00000165140, ENSG00000067057, ENSG00000162882, ENSG00000112992	3.5681	1	0.241537	0.233523
Heart	GroupB	GO:0050794~regulation of cellular process	165	0.0138368	ENSG00000157119, ENSG00000130037, ENSG00000214114, ENSG00000213145, ENSG00000073711, ENSG00000182836, ENSG00000105997, ENSG00000179388, ENSG00000171385, ENSG00000198626, ENSG00000008853, ENSG00000138675, ENSG00000100628, ENSG00000080371, ENSG00000151929, ENSG00000119922, ENSG00000085662, ENSG00000165140, ENSG00000184185, ENSG00000141052, ENSG00000107371, ENSG00000124678, ENSG00000105991, ENSG0000…	1.11456	1	0.241537	0.233523
Heart	GroupB	GO:0010649~regulation of cell communication by electrical coupling	3	0.0138534	ENSG00000183023, ENSG00000130528, ENSG00000118729	16.3505	1	0.241537	0.233523
Heart	GroupB	GO:0071435~potassium ion export	3	0.0138534	ENSG00000130037, ENSG00000180509, ENSG00000171385	16.3505	1	0.241537	0.233523
Heart	GroupB	GO:0006757~ATP generation from ADP	5	0.0138923	ENSG00000106633, ENSG00000109107, ENSG00000187097, ENSG00000165140, ENSG00000067057	5.3676	1	0.241537	0.233523
Heart	GroupB	GO:0048662~negative regulation of smooth muscle cell proliferation	4	0.0139101	ENSG00000204472, ENSG00000106809, ENSG00000130176, ENSG00000103034	7.87248	1	0.241537	0.233523
Heart	GroupB	GO:0019725~cellular homeostasis	21	0.0139804	ENSG00000110955, ENSG00000130037, ENSG00000176273, ENSG00000133424, ENSG00000113739, ENSG00000106633, ENSG00000104369, ENSG00000173175, ENSG00000197763, ENSG00000198523, ENSG00000105409, ENSG00000129170, ENSG00000198626, ENSG00000112992, ENSG00000174502, ENSG00000143324, ENSG00000130528, ENSG00000183023, ENSG00000118729, ENSG00000162882, ENSG00000182533	1.78619	1	0.241537	0.233523
Heart	GroupB	GO:0051283~negative regulation of sequestering of calcium ion	6	0.0139891	ENSG00000104369, ENSG00000183023, ENSG00000130528, ENSG00000198523, ENSG00000118729, ENSG00000198626	4.20905	1	0.241537	0.233523
Heart	GroupB	GO:0051209~release of sequestered calcium ion into cytosol	6	0.0139891	ENSG00000104369, ENSG00000183023, ENSG00000130528, ENSG00000198523, ENSG00000118729, ENSG00000198626	4.20905	1	0.241537	0.233523
Heart	GroupB	GO:0006732~coenzyme metabolic process	11	0.0140088	ENSG00000106633, ENSG00000075239, ENSG00000109107, ENSG00000187097, ENSG00000165140, ENSG00000067057, ENSG00000076555, ENSG00000165996, ENSG00000162882, ENSG00000112992, ENSG00000154930	2.47421	1	0.241537	0.233523
Heart	GroupB	GO:1902531~regulation of intracellular signal transduction	36	0.015389	ENSG00000104369, ENSG00000136235, ENSG00000134452, ENSG00000198523, ENSG00000134313, ENSG00000008853, ENSG00000138675, ENSG00000112343, ENSG00000187097, ENSG00000085662, ENSG00000165140, ENSG00000160293, ENSG00000130528, ENSG00000119729, ENSG00000176490, ENSG00000184545, ENSG00000103034, ENSG00000068078, ENSG00000156011, ENSG00000064012, ENSG00000115602, ENSG00000136045, ENSG00000196139, ENSG0000…	1.48815	1	0.264107	0.255343
Heart	GroupB	GO:0050896~response to stimulus	135	0.0154686	ENSG00000130037, ENSG00000133424, ENSG00000213145, ENSG00000073711, ENSG00000182836, ENSG00000179388, ENSG00000198626, ENSG00000008853, ENSG00000138675, ENSG00000100628, ENSG00000080371, ENSG00000151929, ENSG00000119922, ENSG00000085662, ENSG00000165140, ENSG00000141052, ENSG00000107371, ENSG00000124678, ENSG00000184983, ENSG00000169902, ENSG00000105991, ENSG00000013016, ENSG00000109158, ENSG0000…	1.1484	1	0.264248	0.255481
Heart	GroupB	GO:0010243~response to organonitrogen compound	20	0.0158746	ENSG00000113739, ENSG00000103994, ENSG00000106633, ENSG00000173175, ENSG00000198523, ENSG00000204472, ENSG00000198626, ENSG00000115884, ENSG00000152413, ENSG00000085662, ENSG00000180509, ENSG00000121671, ENSG00000119729, ENSG00000183023, ENSG00000118729, ENSG00000107263, ENSG00000123358, ENSG00000108576, ENSG00000125257, ENSG00000124882	1.796	1	0.268694	0.259778
Heart	GroupB	GO:0071495~cellular response to endogenous stimulus	27	0.0159119	ENSG00000103994, ENSG00000179388, ENSG00000134452, ENSG00000204472, ENSG00000156804, ENSG00000134313, ENSG00000198626, ENSG00000138675, ENSG00000168675, ENSG00000085662, ENSG00000141052, ENSG00000180509, ENSG00000119729, ENSG00000138829, ENSG00000106633, ENSG00000068078, ENSG00000173175, ENSG00000105409, ENSG00000196139, ENSG00000115641, ENSG00000121671, ENSG00000183023, ENSG00000118729, ENSG0000…	1.61436	1	0.268694	0.259778
Heart	GroupB	GO:0033275~actin-myosin filament sliding	4	0.0161024	ENSG00000159173, ENSG00000118194, ENSG00000155657, ENSG00000136842	7.45814	1	0.268694	0.259778
Heart	GroupB	GO:0030049~muscle filament sliding	4	0.0161024	ENSG00000159173, ENSG00000118194, ENSG00000155657, ENSG00000136842	7.45814	1	0.268694	0.259778
Heart	GroupB	GO:0043623~cellular protein complex assembly	16	0.0161125	ENSG00000109846, ENSG00000204472, ENSG00000134775, ENSG00000155657, ENSG00000136842, ENSG00000085832, ENSG00000168675, ENSG00000163171, ENSG00000163380, ENSG00000128609, ENSG00000112290, ENSG00000118729, ENSG00000123545, ENSG00000184983, ENSG00000164532, ENSG00000182533	1.97154	1	0.268694	0.259778
Heart	GroupB	GO:0003007~heart morphogenesis	9	0.0162427	ENSG00000159173, ENSG00000118194, ENSG00000164532, ENSG00000198626, ENSG00000057294, ENSG00000155657, ENSG00000182533, ENSG00000103034, ENSG00000115641	2.77248	1	0.268694	0.259778
Heart	GroupB	GO:1902656~calcium ion import into cytosol	6	0.0163086	ENSG00000104369, ENSG00000183023, ENSG00000130528, ENSG00000198523, ENSG00000118729, ENSG00000198626	4.0487	1	0.268694	0.259778
Heart	GroupB	GO:0097553~calcium ion transmembrane import into cytosol	6	0.0163086	ENSG00000104369, ENSG00000183023, ENSG00000130528, ENSG00000198523, ENSG00000118729, ENSG00000198626	4.0487	1	0.268694	0.259778
Heart	GroupB	GO:0001568~blood vessel development	16	0.0164024	ENSG00000110955, ENSG00000105997, ENSG00000132329, ENSG00000179388, ENSG00000138448, ENSG00000120937, ENSG00000170558, ENSG00000141052, ENSG00000160293, ENSG00000140545, ENSG00000107263, ENSG00000123358, ENSG00000164532, ENSG00000144476, ENSG00000124882, ENSG00000105991	1.96812	1	0.269043	0.260116
Heart	GroupB	GO:0019722~calcium-mediated signaling	7	0.0177499	ENSG00000104369, ENSG00000183023, ENSG00000130528, ENSG00000198523, ENSG00000118729, ENSG00000198626, ENSG00000140563	3.37392	1	0.289863	0.280245
Heart	GroupB	GO:0009966~regulation of signal transduction	52	0.0178808	ENSG00000073711, ENSG00000134313, ENSG00000008853, ENSG00000138675, ENSG00000187097, ENSG00000085662, ENSG00000165140, ENSG00000141052, ENSG00000005020, ENSG00000160293, ENSG00000119729, ENSG00000164532, ENSG00000184545, ENSG00000156011, ENSG00000064012, ENSG00000138448, ENSG00000058091, ENSG00000153820, ENSG00000152413, ENSG00000116991, ENSG00000118729, ENSG00000107242, ENSG00000144476, ENSG0000…	1.35056	1	0.29072	0.281074
Heart	GroupB	GO:0048589~developmental growth	16	0.0180821	ENSG00000133424, ENSG00000113739, ENSG00000073711, ENSG00000068078, ENSG00000176697, ENSG00000076555, ENSG00000114999, ENSG00000106809, ENSG00000080371, ENSG00000164532, ENSG00000108576, ENSG00000182533, ENSG00000124882, ENSG00000035403, ENSG00000053108, ENSG00000103034	1.94449	1	0.292709	0.282997
Heart	GroupB	GO:1901017~negative regulation of potassium ion transmembrane transporter activity	3	0.0183084	ENSG00000180509, ENSG00000118729, ENSG00000182533	14.1705	1	0.293805	0.284057
Heart	GroupB	GO:0006000~fructose metabolic process	3	0.0183084	ENSG00000109107, ENSG00000085662, ENSG00000165140	14.1705	1	0.293805	0.284057
Heart	GroupB	GO:0016310~phosphorylation	44	0.0184332	ENSG00000170390, ENSG00000067057, ENSG00000136235, ENSG00000134452, ENSG00000204472, ENSG00000134313, ENSG00000138675, ENSG00000155657, ENSG00000168675, ENSG00000141198, ENSG00000187097, ENSG00000141052, ENSG00000165140, ENSG00000160293, ENSG00000130528, ENSG00000184983, ENSG00000176490, ENSG00000184545, ENSG00000103034, ENSG00000109846, ENSG00000106633, ENSG00000068078, ENSG00000109107, ENSG0000…	1.39861	1	0.294533	0.284761
Heart	GroupB	GO:0003208~cardiac ventricle morphogenesis	5	0.0185876	ENSG00000159173, ENSG00000118194, ENSG00000164532, ENSG00000198626, ENSG00000057294	4.9203	1	0.295727	0.285914
Heart	GroupB	GO:0048523~negative regulation of cellular process	76	0.018917	ENSG00000157119, ENSG00000073711, ENSG00000179388, ENSG00000204472, ENSG00000106809, ENSG00000198626, ENSG00000187098, ENSG00000164530, ENSG00000151929, ENSG00000165140, ENSG00000141052, ENSG00000005020, ENSG00000119729, ENSG00000164532, ENSG00000184545, ENSG00000035403, ENSG00000106633, ENSG00000154153, ENSG00000076555, ENSG00000064012, ENSG00000171033, ENSG00000138448, ENSG00000129170, ENSG0000…	1.25227	1	0.299681	0.289737
Heart	GroupB	GO:0006873~cellular ion homeostasis	16	0.0191886	ENSG00000110955, ENSG00000130037, ENSG00000176273, ENSG00000113739, ENSG00000104369, ENSG00000173175, ENSG00000198523, ENSG00000105409, ENSG00000129170, ENSG00000198626, ENSG00000174502, ENSG00000143324, ENSG00000130528, ENSG00000183023, ENSG00000118729, ENSG00000182533	1.92795	1	0.30269	0.292647
Heart	GroupB	GO:0043112~receptor metabolic process	7	0.019404	ENSG00000085832, ENSG00000113615, ENSG00000132329, ENSG00000138448, ENSG00000182533, ENSG00000144476, ENSG00000013016	3.30644	1	0.30479	0.294677
Heart	GroupB	GO:0051282~regulation of sequestering of calcium ion	6	0.0195507	ENSG00000104369, ENSG00000183023, ENSG00000130528, ENSG00000198523, ENSG00000118729, ENSG00000198626	3.86467	1	0.3058	0.295653
Heart	GroupB	GO:0048646~anatomical structure formation involved in morphogenesis	26	0.0200427	ENSG00000073711, ENSG00000105997, ENSG00000179388, ENSG00000134775, ENSG00000135424, ENSG00000155657, ENSG00000163380, ENSG00000160293, ENSG00000140545, ENSG00000164532, ENSG00000105991, ENSG00000013016, ENSG00000138829, ENSG00000110955, ENSG00000132329, ENSG00000138448, ENSG00000120937, ENSG00000129170, ENSG00000136842, ENSG00000115641, ENSG00000118729, ENSG00000123358, ENSG00000182533, ENSG0000…	1.60049	1	0.312178	0.30182
Heart	GroupB	GO:0046031~ADP metabolic process	5	0.0203461	ENSG00000106633, ENSG00000109107, ENSG00000187097, ENSG00000165140, ENSG00000067057	4.78732	1	0.315577	0.305106
Heart	GroupB	GO:0014074~response to purine-containing compound	7	0.0205633	ENSG00000180509, ENSG00000183023, ENSG00000118729, ENSG00000107263, ENSG00000108576, ENSG00000198626, ENSG00000115884	3.26294	1	0.316274	0.30578
Heart	GroupB	GO:0006629~lipid metabolic process	29	0.0205869	ENSG00000172292, ENSG00000133424, ENSG00000182836, ENSG00000075239, ENSG00000138675, ENSG00000085662, ENSG00000110080, ENSG00000160293, ENSG00000108242, ENSG00000110955, ENSG00000068078, ENSG00000155189, ENSG00000154252, ENSG00000076555, ENSG00000196139, ENSG00000198911, ENSG00000115884, ENSG00000152234, ENSG00000154930, ENSG00000135697, ENSG00000159063, ENSG00000205678, ENSG00000156471, ENSG0000…	1.5449	1	0.316274	0.30578
Heart	GroupB	GO:0055003~cardiac myofibril assembly	3	0.0207323	ENSG00000129170, ENSG00000134775, ENSG00000155657	13.2848	1	0.316274	0.30578
Heart	GroupB	GO:0055119~relaxation of cardiac muscle	3	0.0207323	ENSG00000183023, ENSG00000130528, ENSG00000198523	13.2848	1	0.316274	0.30578
Heart	GroupB	GO:0051208~sequestering of calcium ion	6	0.0209578	ENSG00000104369, ENSG00000183023, ENSG00000130528, ENSG00000198523, ENSG00000118729, ENSG00000198626	3.79566	1	0.318188	0.30763
Heart	GroupB	GO:0098656~anion transmembrane transport	8	0.0210294	ENSG00000143324, ENSG00000154122, ENSG00000076555, ENSG00000079215, ENSG00000155380, ENSG00000125257, ENSG00000174502, ENSG00000109158	2.89193	1	0.318188	0.30763
Heart	GroupB	GO:0015992~proton transport	7	0.0211602	ENSG00000110955, ENSG00000189043, ENSG00000088386, ENSG00000105409, ENSG00000126267, ENSG00000152234, ENSG00000112992	3.24161	1	0.318866	0.308286
Heart	GroupB	GO:1902600~hydrogen ion transmembrane transport	6	0.0216855	ENSG00000110955, ENSG00000189043, ENSG00000105409, ENSG00000126267, ENSG00000152234, ENSG00000112992	3.76207	1	0.325457	0.314659
Heart	GroupB	GO:0040008~regulation of growth	17	0.0221908	ENSG00000109846, ENSG00000113739, ENSG00000073711, ENSG00000068078, ENSG00000176697, ENSG00000112667, ENSG00000076555, ENSG00000114999, ENSG00000120937, ENSG00000080371, ENSG00000141052, ENSG00000165140, ENSG00000012232, ENSG00000164532, ENSG00000108576, ENSG00000182533, ENSG00000053108	1.84738	1	0.331698	0.320692
Heart	GroupB	GO:0006818~hydrogen transport	7	0.0223891	ENSG00000110955, ENSG00000189043, ENSG00000088386, ENSG00000105409, ENSG00000126267, ENSG00000152234, ENSG00000112992	3.19978	1	0.333319	0.322259
Heart	GroupB	GO:0051480~regulation of cytosolic calcium ion concentration	10	0.0225329	ENSG00000130037, ENSG00000176273, ENSG00000104369, ENSG00000173175, ENSG00000183023, ENSG00000130528, ENSG00000198523, ENSG00000118729, ENSG00000198626, ENSG00000182533	2.42645	1	0.334117	0.323031
Heart	GroupB	GO:2000021~regulation of ion homeostasis	8	0.0226276	ENSG00000104369, ENSG00000183023, ENSG00000130528, ENSG00000198523, ENSG00000118729, ENSG00000120937, ENSG00000198626, ENSG00000182533	2.84833	1	0.334186	0.323097
Heart	GroupB	GO:0051128~regulation of cellular component organization	45	0.0228202	ENSG00000084090, ENSG00000176697, ENSG00000112667, ENSG00000134775, ENSG00000134313, ENSG00000106809, ENSG00000057294, ENSG00000135424, ENSG00000187098, ENSG00000080371, ENSG00000168675, ENSG00000141198, ENSG00000163380, ENSG00000141052, ENSG00000165140, ENSG00000180509, ENSG00000119729, ENSG00000140545, ENSG00000109099, ENSG00000162614, ENSG00000164532, ENSG00000103034, ENSG00000013016, ENSG0000…	1.37252	1	0.335692	0.324554
Heart	GroupB	GO:0044765~single-organism transport	62	0.0231057	ENSG00000130037, ENSG00000176273, ENSG00000084090, ENSG00000154122, ENSG00000113739, ENSG00000113615, ENSG00000171385, ENSG00000204472, ENSG00000198626, ENSG00000155657, ENSG00000080371, ENSG00000184185, ENSG00000160293, ENSG00000119729, ENSG00000035403, ENSG00000013016, ENSG00000109158, ENSG00000106633, ENSG00000076555, ENSG00000099337, ENSG00000173175, ENSG00000171033, ENSG00000138448, ENSG0000…	1.28634	1	0.338549	0.327316
Heart	GroupB	GO:0006874~cellular calcium ion homeostasis	12	0.023399	ENSG00000130037, ENSG00000176273, ENSG00000113739, ENSG00000104369, ENSG00000173175, ENSG00000183023, ENSG00000130528, ENSG00000198523, ENSG00000118729, ENSG00000129170, ENSG00000198626, ENSG00000182533	2.16343	1	0.341166	0.329846
Heart	GroupB	GO:1902578~single-organism localization	65	0.0234684	ENSG00000130037, ENSG00000176273, ENSG00000084090, ENSG00000154122, ENSG00000113739, ENSG00000113615, ENSG00000171385, ENSG00000204472, ENSG00000198626, ENSG00000155657, ENSG00000080371, ENSG00000184185, ENSG00000160293, ENSG00000119729, ENSG00000035403, ENSG00000013016, ENSG00000109158, ENSG00000106633, ENSG00000076555, ENSG00000064012, ENSG00000099337, ENSG00000173175, ENSG00000171033, ENSG0000…	1.27432	1	0.341166	0.329846
Heart	GroupB	GO:0098771~inorganic ion homeostasis	17	0.0239957	ENSG00000110955, ENSG00000130037, ENSG00000176273, ENSG00000113739, ENSG00000104369, ENSG00000173175, ENSG00000198523, ENSG00000105409, ENSG00000120937, ENSG00000129170, ENSG00000198626, ENSG00000174502, ENSG00000143324, ENSG00000130528, ENSG00000183023, ENSG00000118729, ENSG00000182533	1.83053	1	0.347469	0.33594
Heart	GroupB	GO:0007165~signal transduction	97	0.0249476	ENSG00000130037, ENSG00000213145, ENSG00000073711, ENSG00000182836, ENSG00000198626, ENSG00000008853, ENSG00000138675, ENSG00000100628, ENSG00000080371, ENSG00000151929, ENSG00000119922, ENSG00000085662, ENSG00000165140, ENSG00000141052, ENSG00000124678, ENSG00000109158, ENSG00000156011, ENSG00000173175, ENSG00000138448, ENSG00000153820, ENSG00000158435, ENSG00000116991, ENSG00000118729, ENSG0000…	1.19007	1	0.359847	0.347907
Heart	GroupB	GO:0048519~negative regulation of biological process	80	0.0251418	ENSG00000130037, ENSG00000157119, ENSG00000073711, ENSG00000113739, ENSG00000179388, ENSG00000204472, ENSG00000106809, ENSG00000198626, ENSG00000187098, ENSG00000164530, ENSG00000151929, ENSG00000165140, ENSG00000141052, ENSG00000005020, ENSG00000119729, ENSG00000164532, ENSG00000184545, ENSG00000035403, ENSG00000106633, ENSG00000154153, ENSG00000076555, ENSG00000064012, ENSG00000171033, ENSG0000…	1.22608	1	0.361243	0.349257
Heart	GroupB	GO:0003231~cardiac ventricle development	6	0.0255699	ENSG00000159173, ENSG00000141052, ENSG00000118194, ENSG00000164532, ENSG00000198626, ENSG00000057294	3.60266	1	0.365976	0.353832
Heart	GroupB	GO:0031000~response to caffeine	3	0.0259528	ENSG00000183023, ENSG00000118729, ENSG00000198626	11.8087	1	0.370028	0.35775
Heart	GroupB	GO:0070509~calcium ion import	7	0.0264027	ENSG00000106633, ENSG00000104369, ENSG00000183023, ENSG00000130528, ENSG00000198523, ENSG00000118729, ENSG00000198626	3.08054	1	0.372461	0.360103
Heart	GroupB	GO:0060341~regulation of cellular localization	20	0.0264114	ENSG00000109846, ENSG00000084090, ENSG00000170390, ENSG00000104369, ENSG00000176697, ENSG00000064012, ENSG00000118194, ENSG00000173175, ENSG00000198523, ENSG00000171033, ENSG00000198626, ENSG00000198911, ENSG00000170558, ENSG00000080371, ENSG00000180509, ENSG00000130528, ENSG00000119729, ENSG00000183023, ENSG00000118729, ENSG00000182533	1.6991	1	0.372461	0.360103
Heart	GroupB	GO:0048583~regulation of response to stimulus	65	0.026425	ENSG00000073711, ENSG00000204472, ENSG00000134313, ENSG00000008853, ENSG00000138675, ENSG00000159173, ENSG00000151929, ENSG00000187097, ENSG00000085662, ENSG00000165140, ENSG00000141052, ENSG00000005020, ENSG00000160293, ENSG00000119729, ENSG00000107371, ENSG00000164532, ENSG00000184545, ENSG00000109158, ENSG00000156011, ENSG00000064012, ENSG00000173175, ENSG00000138448, ENSG00000058091, ENSG0000…	1.26661	1	0.372461	0.360103
Heart	GroupB	GO:0032787~monocarboxylic acid metabolic process	15	0.0270783	ENSG00000075239, ENSG00000109107, ENSG00000106633, ENSG00000067057, ENSG00000076555, ENSG00000196139, ENSG00000154930, ENSG00000187097, ENSG00000165140, ENSG00000205678, ENSG00000108242, ENSG00000155380, ENSG00000162882, ENSG00000165996, ENSG00000145861	1.90123	1	0.380225	0.367609
Heart	GroupB	GO:0034637~cellular carbohydrate biosynthetic process	5	0.0272886	ENSG00000106633, ENSG00000085662, ENSG00000165140, ENSG00000145861, ENSG00000163754	4.3736	1	0.381731	0.369065
Heart	GroupB	GO:0031548~regulation of brain-derived neurotrophic factor receptor signaling pathway	2	0.0279119	ENSG00000176697, ENSG00000053108	70.8523	1	0.388983	0.376076
Heart	GroupB	GO:0055010~ventricular cardiac muscle tissue morphogenesis	4	0.0282408	ENSG00000159173, ENSG00000118194, ENSG00000198626, ENSG00000057294	6.02998	1	0.392092	0.379082
Heart	GroupB	GO:0055074~calcium ion homeostasis	12	0.0284759	ENSG00000130037, ENSG00000176273, ENSG00000113739, ENSG00000104369, ENSG00000173175, ENSG00000183023, ENSG00000130528, ENSG00000198523, ENSG00000118729, ENSG00000129170, ENSG00000198626, ENSG00000182533	2.09933	1	0.392903	0.379867
Heart	GroupB	GO:0032535~regulation of cellular component size	11	0.0285112	ENSG00000080371, ENSG00000176697, ENSG00000163171, ENSG00000163380, ENSG00000114999, ENSG00000160293, ENSG00000112290, ENSG00000134775, ENSG00000182533, ENSG00000136842, ENSG00000053108	2.20163	1	0.392903	0.379867
Heart	GroupB	GO:1901380~negative regulation of potassium ion transmembrane transport	3	0.0287416	ENSG00000180509, ENSG00000118729, ENSG00000182533	11.1872	1	0.394611	0.381518
Heart	GroupB	GO:0000302~response to reactive oxygen species	8	0.0291955	ENSG00000109846, ENSG00000130037, ENSG00000085662, ENSG00000198125, ENSG00000197763, ENSG00000183023, ENSG00000196139, ENSG00000115884	2.69914	1	0.399365	0.386114
Heart	GroupB	GO:0051238~sequestering of metal ion	6	0.0298744	ENSG00000104369, ENSG00000183023, ENSG00000130528, ENSG00000198523, ENSG00000118729, ENSG00000198626	3.45621	1	0.407148	0.393639
Heart	GroupB	GO:0008610~lipid biosynthetic process	16	0.0304937	ENSG00000172292, ENSG00000133424, ENSG00000068078, ENSG00000155189, ENSG00000154252, ENSG00000076555, ENSG00000196139, ENSG00000138675, ENSG00000154930, ENSG00000135697, ENSG00000085662, ENSG00000205678, ENSG00000110080, ENSG00000156471, ENSG00000107242, ENSG00000165996	1.81673	1	0.413119	0.399411
Heart	GroupB	GO:0006165~nucleoside diphosphate phosphorylation	5	0.0306468	ENSG00000106633, ENSG00000109107, ENSG00000187097, ENSG00000165140, ENSG00000067057	4.2174	1	0.413119	0.399411
Heart	GroupB	GO:0043500~muscle adaptation	5	0.0306468	ENSG00000159173, ENSG00000158022, ENSG00000204472, ENSG00000156804, ENSG00000182533	4.2174	1	0.413119	0.399411
Heart	GroupB	GO:0010469~regulation of receptor activity	6	0.0307867	ENSG00000104369, ENSG00000130528, ENSG00000198523, ENSG00000118729, ENSG00000182533, ENSG00000124882	3.42834	1	0.413501	0.399781
Heart	GroupB	GO:0010033~response to organic substance	52	0.0316307	ENSG00000130037, ENSG00000113739, ENSG00000213145, ENSG00000179388, ENSG00000204472, ENSG00000134313, ENSG00000198626, ENSG00000138675, ENSG00000119922, ENSG00000085662, ENSG00000141052, ENSG00000119729, ENSG00000106633, ENSG00000076555, ENSG00000064012, ENSG00000173175, ENSG00000152413, ENSG00000058056, ENSG00000118729, ENSG00000109189, ENSG00000123358, ENSG00000108576, ENSG00000144476, ENSG0000…	1.30557	1	0.422923	0.408891
Heart	GroupB	GO:0042542~response to hydrogen peroxide	6	0.0317164	ENSG00000109846, ENSG00000130037, ENSG00000085662, ENSG00000198125, ENSG00000183023, ENSG00000115884	3.40091	1	0.422923	0.408891
Heart	GroupB	GO:0001525~angiogenesis	12	0.0321549	ENSG00000110955, ENSG00000105997, ENSG00000132329, ENSG00000179388, ENSG00000160293, ENSG00000138448, ENSG00000140545, ENSG00000123358, ENSG00000120937, ENSG00000164532, ENSG00000144476, ENSG00000124882	2.05866	1	0.425708	0.411583
Heart	GroupB	GO:0072503~cellular divalent inorganic cation homeostasis	12	0.0321549	ENSG00000130037, ENSG00000176273, ENSG00000113739, ENSG00000104369, ENSG00000173175, ENSG00000183023, ENSG00000130528, ENSG00000198523, ENSG00000118729, ENSG00000129170, ENSG00000198626, ENSG00000182533	2.05866	1	0.425708	0.411583
Heart	GroupB	GO:0030003~cellular cation homeostasis	15	0.0324908	ENSG00000110955, ENSG00000130037, ENSG00000176273, ENSG00000113739, ENSG00000104369, ENSG00000173175, ENSG00000198523, ENSG00000105409, ENSG00000129170, ENSG00000198626, ENSG00000174502, ENSG00000130528, ENSG00000183023, ENSG00000118729, ENSG00000182533	1.85477	1	0.428624	0.414402
Heart	GroupB	GO:0009628~response to abiotic stimulus	23	0.032917	ENSG00000109846, ENSG00000130037, ENSG00000113739, ENSG00000213145, ENSG00000064012, ENSG00000198125, ENSG00000204472, ENSG00000105409, ENSG00000129170, ENSG00000198626, ENSG00000155657, ENSG00000151929, ENSG00000085662, ENSG00000141052, ENSG00000136560, ENSG00000158022, ENSG00000079215, ENSG00000121671, ENSG00000183023, ENSG00000108576, ENSG00000182533, ENSG00000105991, ENSG00000103034	1.58368	1	0.432707	0.418349
Heart	GroupB	GO:0070588~calcium ion transmembrane transport	9	0.0330911	ENSG00000104369, ENSG00000183023, ENSG00000130528, ENSG00000198523, ENSG00000138448, ENSG00000118729, ENSG00000198626, ENSG00000182533, ENSG00000013016	2.41542	1	0.433458	0.419076
Heart	GroupB	GO:0048640~negative regulation of developmental growth	5	0.0354875	ENSG00000068078, ENSG00000113739, ENSG00000108576, ENSG00000182533, ENSG00000053108	4.0257	1	0.463212	0.447843
Heart	GroupB	GO:0003229~ventricular cardiac muscle tissue development	4	0.0365899	ENSG00000159173, ENSG00000118194, ENSG00000198626, ENSG00000057294	5.45018	1	0.473195	0.457494
Heart	GroupB	GO:0042592~homeostatic process	33	0.0367371	ENSG00000130037, ENSG00000176273, ENSG00000133424, ENSG00000113739, ENSG00000104369, ENSG00000113615, ENSG00000198125, ENSG00000198523, ENSG00000106628, ENSG00000198626, ENSG00000057294, ENSG00000085662, ENSG00000130528, ENSG00000110955, ENSG00000106633, ENSG00000076555, ENSG00000173175, ENSG00000197763, ENSG00000105409, ENSG00000120937, ENSG00000129170, ENSG00000198911, ENSG00000112992, ENSG0000…	1.42135	1	0.473195	0.457494
Heart	GroupB	GO:0009135~purine nucleoside diphosphate metabolic process	5	0.0367629	ENSG00000106633, ENSG00000109107, ENSG00000187097, ENSG00000165140, ENSG00000067057	3.98047	1	0.473195	0.457494
Heart	GroupB	GO:0009179~purine ribonucleoside diphosphate metabolic process	5	0.0367629	ENSG00000106633, ENSG00000109107, ENSG00000187097, ENSG00000165140, ENSG00000067057	3.98047	1	0.473195	0.457494
Heart	GroupB	GO:0055114~oxidation-reduction process	22	0.0369488	ENSG00000075239, ENSG00000109107, ENSG00000106633, ENSG00000067057, ENSG00000076555, ENSG00000197763, ENSG00000196139, ENSG00000112992, ENSG00000154930, ENSG00000135697, ENSG00000189043, ENSG00000085662, ENSG00000128609, ENSG00000205678, ENSG00000108242, ENSG00000100412, ENSG00000184983, ENSG00000162882, ENSG00000126267, ENSG00000145861, ENSG00000125257, ENSG00000163754	1.58571	1	0.473943	0.458217
Heart	GroupB	GO:0044255~cellular lipid metabolic process	23	0.0373695	ENSG00000172292, ENSG00000133424, ENSG00000075239, ENSG00000068078, ENSG00000155189, ENSG00000154252, ENSG00000076555, ENSG00000196139, ENSG00000138675, ENSG00000115884, ENSG00000154930, ENSG00000135697, ENSG00000159063, ENSG00000205678, ENSG00000160293, ENSG00000110080, ENSG00000108242, ENSG00000156471, ENSG00000107242, ENSG00000165996, ENSG00000145861, ENSG00000182533, ENSG00000124882	1.56242	1	0.476706	0.460889
Heart	GroupB	GO:0060402~calcium ion transport into cytosol	6	0.0376628	ENSG00000104369, ENSG00000183023, ENSG00000130528, ENSG00000198523, ENSG00000118729, ENSG00000198626	3.24514	1	0.476706	0.460889
Heart	GroupB	GO:0055080~cation homeostasis	16	0.0377139	ENSG00000110955, ENSG00000130037, ENSG00000176273, ENSG00000113739, ENSG00000104369, ENSG00000173175, ENSG00000198523, ENSG00000105409, ENSG00000120937, ENSG00000129170, ENSG00000198626, ENSG00000174502, ENSG00000130528, ENSG00000183023, ENSG00000118729, ENSG00000182533	1.76304	1	0.476706	0.460889
Heart	GroupB	GO:0006817~phosphate ion transport	3	0.0377761	ENSG00000143324, ENSG00000154122, ENSG00000121671	9.66168	1	0.476706	0.460889
Heart	GroupB	GO:0071417~cellular response to organonitrogen compound	13	0.0378621	ENSG00000103994, ENSG00000106633, ENSG00000173175, ENSG00000204472, ENSG00000198626, ENSG00000085662, ENSG00000180509, ENSG00000119729, ENSG00000183023, ENSG00000118729, ENSG00000107263, ENSG00000123358, ENSG00000108576	1.93099	1	0.476706	0.460889
Heart	GroupB	GO:0015980~energy derivation by oxidation of organic compounds	9	0.0379858	ENSG00000106633, ENSG00000189043, ENSG00000128609, ENSG00000100412, ENSG00000184983, ENSG00000126267, ENSG00000145861, ENSG00000112992, ENSG00000163754	2.35303	1	0.476706	0.460889
Heart	GroupB	GO:0046939~nucleotide phosphorylation	5	0.0380645	ENSG00000106633, ENSG00000109107, ENSG00000187097, ENSG00000165140, ENSG00000067057	3.93624	1	0.476706	0.460889
Heart	GroupB	GO:1901137~carbohydrate derivative biosynthetic process	18	0.0383491	ENSG00000110955, ENSG00000257594, ENSG00000133424, ENSG00000075239, ENSG00000154252, ENSG00000132329, ENSG00000173175, ENSG00000120937, ENSG00000106809, ENSG00000115884, ENSG00000152234, ENSG00000100626, ENSG00000159063, ENSG00000187097, ENSG00000169255, ENSG00000180509, ENSG00000110080, ENSG00000012232	1.68696	1	0.478654	0.462772
Heart	GroupB	GO:0050801~ion homeostasis	17	0.0385321	ENSG00000110955, ENSG00000130037, ENSG00000176273, ENSG00000113739, ENSG00000104369, ENSG00000173175, ENSG00000198523, ENSG00000105409, ENSG00000120937, ENSG00000129170, ENSG00000198626, ENSG00000174502, ENSG00000143324, ENSG00000130528, ENSG00000183023, ENSG00000118729, ENSG00000182533	1.72316	1	0.479324	0.46342
Heart	GroupB	GO:0009185~ribonucleoside diphosphate metabolic process	5	0.0393922	ENSG00000106633, ENSG00000109107, ENSG00000187097, ENSG00000165140, ENSG00000067057	3.89298	1	0.48697	0.470813
Heart	GroupB	GO:0048878~chemical homeostasis	23	0.0394095	ENSG00000110955, ENSG00000130037, ENSG00000176273, ENSG00000113739, ENSG00000106633, ENSG00000104369, ENSG00000113615, ENSG00000173175, ENSG00000198523, ENSG00000105409, ENSG00000120937, ENSG00000129170, ENSG00000198626, ENSG00000057294, ENSG00000152413, ENSG00000174502, ENSG00000143324, ENSG00000121671, ENSG00000130528, ENSG00000183023, ENSG00000118729, ENSG00000155380, ENSG00000182533	1.55348	1	0.48697	0.470813
Heart	GroupB	GO:0060401~cytosolic calcium ion transport	6	0.0397867	ENSG00000104369, ENSG00000183023, ENSG00000130528, ENSG00000198523, ENSG00000118729, ENSG00000198626	3.19635	1	0.489998	0.473739
Heart	GroupB	GO:0009887~organ morphogenesis	22	0.0401081	ENSG00000138829, ENSG00000073711, ENSG00000213145, ENSG00000068078, ENSG00000105997, ENSG00000118194, ENSG00000198626, ENSG00000057294, ENSG00000155657, ENSG00000115884, ENSG00000115641, ENSG00000170558, ENSG00000159173, ENSG00000125812, ENSG00000164532, ENSG00000108576, ENSG00000165996, ENSG00000182533, ENSG00000124882, ENSG00000100592, ENSG00000105991, ENSG00000103034	1.57132	1	0.49232	0.475985
Heart	GroupB	GO:0031214~biomineral tissue development	6	0.0408755	ENSG00000138829, ENSG00000154122, ENSG00000068078, ENSG00000183023, ENSG00000136235, ENSG00000165996	3.17249	1	0.500084	0.483491
Heart	GroupB	GO:1902080~regulation of calcium ion import into sarcoplasmic reticulum	2	0.0415756	ENSG00000130528, ENSG00000198523	47.2349	1	0.503662	0.486951
Heart	GroupB	GO:1902081~negative regulation of calcium ion import into sarcoplasmic reticulum	2	0.0415756	ENSG00000130528, ENSG00000198523	47.2349	1	0.503662	0.486951
Heart	GroupB	GO:0030505~inorganic diphosphate transport	2	0.0415756	ENSG00000154122, ENSG00000154269	47.2349	1	0.503662	0.486951
Heart	GroupB	GO:0044724~single-organism carbohydrate catabolic process	6	0.0419822	ENSG00000106633, ENSG00000109107, ENSG00000187097, ENSG00000165140, ENSG00000067057, ENSG00000163754	3.14899	1	0.506932	0.490111
Heart	GroupB	GO:0019320~hexose catabolic process	4	0.0421401	ENSG00000106633, ENSG00000109107, ENSG00000165140, ENSG00000067057	5.1529	1	0.507186	0.490357
Heart	GroupB	GO:0044710~single-organism metabolic process	70	0.0425966	ENSG00000133424, ENSG00000182836, ENSG00000134313, ENSG00000138675, ENSG00000100626, ENSG00000187097, ENSG00000085662, ENSG00000165140, ENSG00000160293, ENSG00000119729, ENSG00000107371, ENSG00000184983, ENSG00000184545, ENSG00000257594, ENSG00000106633, ENSG00000109107, ENSG00000076555, ENSG00000173175, ENSG00000197763, ENSG00000138448, ENSG00000112992, ENSG00000135697, ENSG00000058056, ENSG0000…	1.22069	1	0.511021	0.494065
Heart	GroupB	GO:0072507~divalent inorganic cation homeostasis	12	0.0428784	ENSG00000130037, ENSG00000176273, ENSG00000113739, ENSG00000104369, ENSG00000173175, ENSG00000183023, ENSG00000130528, ENSG00000198523, ENSG00000118729, ENSG00000129170, ENSG00000198626, ENSG00000182533	1.96357	1	0.511911	0.494926
Heart	GroupB	GO:0022607~cellular component assembly	48	0.0429469	ENSG00000130037, ENSG00000153132, ENSG00000075239, ENSG00000113615, ENSG00000176697, ENSG00000124171, ENSG00000118194, ENSG00000198523, ENSG00000204472, ENSG00000171385, ENSG00000134775, ENSG00000057294, ENSG00000155657, ENSG00000187098, ENSG00000168675, ENSG00000163380, ENSG00000165140, ENSG00000184185, ENSG00000005020, ENSG00000160293, ENSG00000119729, ENSG00000109099, ENSG00000123545, ENSG0000…	1.29905	1	0.511911	0.494926
Heart	GroupB	GO:0044283~small molecule biosynthetic process	13	0.0437086	ENSG00000075239, ENSG00000109107, ENSG00000106633, ENSG00000076555, ENSG00000196139, ENSG00000154930, ENSG00000135697, ENSG00000085662, ENSG00000165140, ENSG00000205678, ENSG00000079215, ENSG00000162882, ENSG00000165996	1.88746	1	0.514621	0.497545
Heart	GroupB	GO:0043413~macromolecule glycosylation	9	0.0439499	ENSG00000257594, ENSG00000100626, ENSG00000159063, ENSG00000133424, ENSG00000187097, ENSG00000132329, ENSG00000169255, ENSG00000110080, ENSG00000180509	2.28556	1	0.514621	0.497545
Heart	GroupB	GO:0006486~protein glycosylation	9	0.0439499	ENSG00000257594, ENSG00000100626, ENSG00000159063, ENSG00000133424, ENSG00000187097, ENSG00000132329, ENSG00000169255, ENSG00000110080, ENSG00000180509	2.28556	1	0.514621	0.497545
Heart	GroupB	GO:0032413~negative regulation of ion transmembrane transporter activity	4	0.0440788	ENSG00000180509, ENSG00000198523, ENSG00000118729, ENSG00000182533	5.06088	1	0.514621	0.497545
Heart	GroupB	GO:0048747~muscle fiber development	4	0.0440788	ENSG00000157119, ENSG00000162614, ENSG00000155657, ENSG00000152413	5.06088	1	0.514621	0.497545
Heart	GroupB	GO:0055082~cellular chemical homeostasis	17	0.0443058	ENSG00000110955, ENSG00000130037, ENSG00000176273, ENSG00000113739, ENSG00000106633, ENSG00000104369, ENSG00000173175, ENSG00000198523, ENSG00000105409, ENSG00000129170, ENSG00000198626, ENSG00000174502, ENSG00000143324, ENSG00000130528, ENSG00000183023, ENSG00000118729, ENSG00000182533	1.68933	1	0.514621	0.497545
Heart	GroupB	GO:0090281~negative regulation of calcium ion import	3	0.0443198	ENSG00000130528, ENSG00000198523, ENSG00000118729	8.85654	1	0.514621	0.497545
Heart	GroupB	GO:0099623~regulation of cardiac muscle cell membrane repolarization	3	0.0443198	ENSG00000130037, ENSG00000180509, ENSG00000182533	8.85654	1	0.514621	0.497545
Heart	GroupB	GO:0044723~single-organism carbohydrate metabolic process	16	0.0444237	ENSG00000257594, ENSG00000133424, ENSG00000109107, ENSG00000106633, ENSG00000132329, ENSG00000067057, ENSG00000100626, ENSG00000159063, ENSG00000187097, ENSG00000085662, ENSG00000165140, ENSG00000169255, ENSG00000180509, ENSG00000110080, ENSG00000145861, ENSG00000163754	1.72811	1	0.514621	0.497545
Heart	GroupB	GO:0006875~cellular metal ion homeostasis	13	0.0451281	ENSG00000130037, ENSG00000176273, ENSG00000113739, ENSG00000104369, ENSG00000173175, ENSG00000198523, ENSG00000105409, ENSG00000129170, ENSG00000198626, ENSG00000130528, ENSG00000183023, ENSG00000118729, ENSG00000182533	1.87593	1	0.521152	0.50386
Heart	GroupB	GO:0035265~organ growth	6	0.0454103	ENSG00000068078, ENSG00000076555, ENSG00000164532, ENSG00000108576, ENSG00000182533, ENSG00000103034	3.08054	1	0.522783	0.505437
Heart	GroupB	GO:0019932~second-messenger-mediated signaling	8	0.0468704	ENSG00000104369, ENSG00000173175, ENSG00000183023, ENSG00000130528, ENSG00000198523, ENSG00000118729, ENSG00000198626, ENSG00000140563	2.4327	1	0.537921	0.520073
Heart	GroupB	GO:0060343~trabecula formation	3	0.0477375	ENSG00000138829, ENSG00000182533, ENSG00000115641	8.50228	1	0.544501	0.526434
Heart	GroupB	GO:0090075~relaxation of muscle	3	0.0477375	ENSG00000183023, ENSG00000130528, ENSG00000198523	8.50228	1	0.544501	0.526434
Heart	GroupB	GO:0007015~actin filament organization	10	0.0481077	ENSG00000163171, ENSG00000163380, ENSG00000118194, ENSG00000112290, ENSG00000204472, ENSG00000134775, ENSG00000155657, ENSG00000182533, ENSG00000136842, ENSG00000197747	2.11499	1	0.547041	0.528889
Heart	GroupB	GO:1901698~response to nitrogen compound	20	0.0483182	ENSG00000113739, ENSG00000103994, ENSG00000106633, ENSG00000173175, ENSG00000198523, ENSG00000204472, ENSG00000198626, ENSG00000115884, ENSG00000152413, ENSG00000085662, ENSG00000180509, ENSG00000121671, ENSG00000119729, ENSG00000183023, ENSG00000118729, ENSG00000107263, ENSG00000123358, ENSG00000108576, ENSG00000125257, ENSG00000124882	1.58329	1	0.547754	0.52958
Heart	GroupB	GO:0019674~NAD metabolic process	4	0.0501564	ENSG00000106633, ENSG00000109107, ENSG00000067057, ENSG00000162882	4.80355	1	0.566013	0.547232
Heart	GroupB	GO:0090002~establishment of protein localization to plasma membrane	6	0.0502342	ENSG00000170558, ENSG00000119729, ENSG00000057294, ENSG00000182533, ENSG00000197747, ENSG00000013016	2.99376	1	0.566013	0.547232
Heart	GroupB	GO:0032989~cellular component morphogenesis	27	0.0507536	ENSG00000176697, ENSG00000124171, ENSG00000134775, ENSG00000134313, ENSG00000106809, ENSG00000135424, ENSG00000155657, ENSG00000080371, ENSG00000168675, ENSG00000163380, ENSG00000119729, ENSG00000035403, ENSG00000013016, ENSG00000114999, ENSG00000157927, ENSG00000138448, ENSG00000129170, ENSG00000136842, ENSG00000197747, ENSG00000163171, ENSG00000112290, ENSG00000079215, ENSG00000118729, ENSG0000…	1.44815	1	0.56879	0.549917
Heart	GroupB	GO:0071709~membrane assembly	3	0.0512478	ENSG00000170558, ENSG00000182533, ENSG00000197747	8.17527	1	0.56879	0.549917
Heart	GroupB	GO:0061718~glucose catabolic process to pyruvate	3	0.0512478	ENSG00000106633, ENSG00000109107, ENSG00000067057	8.17527	1	0.56879	0.549917
Heart	GroupB	GO:0061621~canonical glycolysis	3	0.0512478	ENSG00000106633, ENSG00000109107, ENSG00000067057	8.17527	1	0.56879	0.549917
Heart	GroupB	GO:0006735~NADH regeneration	3	0.0512478	ENSG00000106633, ENSG00000109107, ENSG00000067057	8.17527	1	0.56879	0.549917
Heart	GroupB	GO:0055067~monovalent inorganic cation homeostasis	6	0.0514855	ENSG00000110955, ENSG00000130037, ENSG00000183023, ENSG00000105409, ENSG00000120937, ENSG00000174502	2.97282	1	0.569722	0.550818
Heart	GroupB	GO:0070085~glycosylation	9	0.05192	ENSG00000257594, ENSG00000100626, ENSG00000159063, ENSG00000133424, ENSG00000187097, ENSG00000132329, ENSG00000169255, ENSG00000110080, ENSG00000180509	2.20647	1	0.569879	0.55097
Heart	GroupB	GO:0006979~response to oxidative stress	11	0.0520184	ENSG00000109846, ENSG00000130037, ENSG00000113739, ENSG00000085662, ENSG00000198125, ENSG00000197763, ENSG00000183023, ENSG00000204472, ENSG00000184983, ENSG00000196139, ENSG00000115884	1.97811	1	0.569879	0.55097
Heart	GroupB	GO:0019915~lipid storage	4	0.0522684	ENSG00000076555, ENSG00000121671, ENSG00000138448, ENSG00000198911	4.72349	1	0.569879	0.55097
Heart	GroupB	GO:0003300~cardiac muscle hypertrophy	4	0.0522684	ENSG00000129170, ENSG00000198626, ENSG00000155657, ENSG00000182533	4.72349	1	0.569879	0.55097
Heart	GroupB	GO:1901379~regulation of potassium ion transmembrane transport	4	0.0522684	ENSG00000080709, ENSG00000180509, ENSG00000118729, ENSG00000182533	4.72349	1	0.569879	0.55097
Heart	GroupB	GO:0055065~metal ion homeostasis	14	0.0531001	ENSG00000130037, ENSG00000176273, ENSG00000113739, ENSG00000104369, ENSG00000173175, ENSG00000198523, ENSG00000105409, ENSG00000120937, ENSG00000129170, ENSG00000198626, ENSG00000130528, ENSG00000183023, ENSG00000118729, ENSG00000182533	1.77766	1	0.576361	0.557237
Heart	GroupB	GO:0051051~negative regulation of transport	12	0.0534321	ENSG00000109846, ENSG00000130037, ENSG00000180509, ENSG00000121671, ENSG00000165912, ENSG00000130528, ENSG00000198523, ENSG00000171033, ENSG00000138448, ENSG00000118729, ENSG00000198911, ENSG00000182533	1.8894	1	0.576361	0.557237
Heart	GroupB	GO:0051716~cellular response to stimulus	111	0.0534467	ENSG00000130037, ENSG00000213145, ENSG00000073711, ENSG00000182836, ENSG00000179388, ENSG00000198626, ENSG00000008853, ENSG00000138675, ENSG00000100628, ENSG00000080371, ENSG00000151929, ENSG00000119922, ENSG00000085662, ENSG00000165140, ENSG00000141052, ENSG00000124678, ENSG00000109158, ENSG00000156011, ENSG00000173175, ENSG00000138448, ENSG00000153820, ENSG00000158435, ENSG00000116991, ENSG0000…	1.13536	1	0.576361	0.557237
Heart	GroupB	GO:0045926~negative regulation of growth	8	0.0534848	ENSG00000109846, ENSG00000068078, ENSG00000113739, ENSG00000165140, ENSG00000120937, ENSG00000108576, ENSG00000182533, ENSG00000053108	2.36174	1	0.576361	0.557237
Heart	GroupB	GO:0046365~monosaccharide catabolic process	4	0.0544227	ENSG00000106633, ENSG00000109107, ENSG00000165140, ENSG00000067057	4.64605	1	0.580915	0.56164
Heart	GroupB	GO:1904063~negative regulation of cation transmembrane transport	4	0.0544227	ENSG00000180509, ENSG00000198523, ENSG00000118729, ENSG00000182533	4.64605	1	0.580915	0.56164
Heart	GroupB	GO:0061620~glycolytic process through glucose-6-phosphate	3	0.0548477	ENSG00000106633, ENSG00000109107, ENSG00000067057	7.87248	1	0.580915	0.56164
Heart	GroupB	GO:0032369~negative regulation of lipid transport	3	0.0548477	ENSG00000121671, ENSG00000138448, ENSG00000198911	7.87248	1	0.580915	0.56164
Heart	GroupB	GO:0098901~regulation of cardiac muscle cell action potential	3	0.0548477	ENSG00000198626, ENSG00000057294, ENSG00000182533	7.87248	1	0.580915	0.56164
Heart	GroupB	GO:0061615~glycolytic process through fructose-6-phosphate	3	0.0548477	ENSG00000106633, ENSG00000109107, ENSG00000067057	7.87248	1	0.580915	0.56164
Heart	GroupB	GO:1990036~calcium ion import into sarcoplasmic reticulum	2	0.055048	ENSG00000130528, ENSG00000198523	35.4262	1	0.581376	0.562085
Heart	GroupB	GO:0014897~striated muscle hypertrophy	4	0.056619	ENSG00000129170, ENSG00000198626, ENSG00000155657, ENSG00000182533	4.57112	1	0.596269	0.576484
Heart	GroupB	GO:0009725~response to hormone	19	0.0568057	ENSG00000075239, ENSG00000113739, ENSG00000103994, ENSG00000106633, ENSG00000198125, ENSG00000173175, ENSG00000198523, ENSG00000204472, ENSG00000156804, ENSG00000105409, ENSG00000196139, ENSG00000115884, ENSG00000115641, ENSG00000085662, ENSG00000158022, ENSG00000121671, ENSG00000119729, ENSG00000123358, ENSG00000124882	1.57634	1	0.59654	0.576747
Heart	GroupB	GO:0010927~cellular component assembly involved in morphogenesis	9	0.057205	ENSG00000163380, ENSG00000118729, ENSG00000129170, ENSG00000134775, ENSG00000155657, ENSG00000182533, ENSG00000125257, ENSG00000136842, ENSG00000013016	2.16895	1	0.597349	0.577529
Heart	GroupB	GO:0032956~regulation of actin cytoskeleton organization	9	0.057205	ENSG00000163171, ENSG00000163380, ENSG00000112290, ENSG00000119729, ENSG00000134775, ENSG00000182533, ENSG00000136842, ENSG00000197747, ENSG00000167657	2.16895	1	0.597349	0.577529
Heart	GroupB	GO:0051154~negative regulation of striated muscle cell differentiation	3	0.0585338	ENSG00000176697, ENSG00000141052, ENSG00000182533	7.59132	1	0.608013	0.587839
Heart	GroupB	GO:0016051~carbohydrate biosynthetic process	7	0.0588225	ENSG00000106633, ENSG00000109107, ENSG00000085662, ENSG00000165140, ENSG00000169255, ENSG00000145861, ENSG00000163754	2.53044	1	0.608013	0.587839
Heart	GroupB	GO:0048468~cell development	37	0.0588598	ENSG00000157119, ENSG00000170390, ENSG00000176697, ENSG00000124171, ENSG00000134775, ENSG00000134313, ENSG00000106809, ENSG00000155657, ENSG00000080371, ENSG00000168675, ENSG00000163380, ENSG00000109099, ENSG00000162614, ENSG00000035403, ENSG00000103034, ENSG00000111802, ENSG00000114999, ENSG00000157927, ENSG00000114956, ENSG00000198797, ENSG00000138448, ENSG00000129170, ENSG00000115884, ENSG0000…	1.33208	1	0.608013	0.587839
Heart	GroupB	GO:0048522~positive regulation of cellular process	79	0.0590569	ENSG00000130037, ENSG00000084090, ENSG00000073711, ENSG00000105997, ENSG00000113615, ENSG00000179388, ENSG00000150401, ENSG00000204472, ENSG00000134313, ENSG00000198626, ENSG00000138675, ENSG00000187098, ENSG00000080371, ENSG00000187097, ENSG00000119922, ENSG00000085662, ENSG00000141052, ENSG00000005020, ENSG00000160293, ENSG00000119729, ENSG00000107371, ENSG00000164532, ENSG00000013016, ENSG0000…	1.17988	1	0.608013	0.587839
Heart	GroupB	GO:0001558~regulation of cell growth	11	0.059224	ENSG00000109846, ENSG00000080371, ENSG00000176697, ENSG00000141052, ENSG00000165140, ENSG00000112667, ENSG00000114999, ENSG00000012232, ENSG00000120937, ENSG00000182533, ENSG00000053108	1.93393	1	0.608013	0.587839
Heart	GroupB	GO:0051258~protein polymerization	8	0.0593282	ENSG00000163171, ENSG00000163380, ENSG00000112290, ENSG00000204472, ENSG00000118729, ENSG00000134775, ENSG00000182533, ENSG00000136842	2.30414	1	0.608013	0.587839
Heart	GroupB	GO:0015698~inorganic anion transport	6	0.0593743	ENSG00000143324, ENSG00000154122, ENSG00000121671, ENSG00000154269, ENSG00000174502, ENSG00000109158	2.85311	1	0.608013	0.587839
Heart	GroupB	GO:0051050~positive regulation of transport	20	0.0602867	ENSG00000084090, ENSG00000106633, ENSG00000113615, ENSG00000064012, ENSG00000115602, ENSG00000138448, ENSG00000120937, ENSG00000198626, ENSG00000198911, ENSG00000057294, ENSG00000115884, ENSG00000152413, ENSG00000170558, ENSG00000080371, ENSG00000180509, ENSG00000119729, ENSG00000140545, ENSG00000145861, ENSG00000182533, ENSG00000013016	1.54027	1	0.615655	0.595228
Heart	GroupB	GO:0032410~negative regulation of transporter activity	4	0.0611361	ENSG00000180509, ENSG00000198523, ENSG00000118729, ENSG00000182533	4.42827	1	0.622614	0.601955
Heart	GroupB	GO:0090407~organophosphate biosynthetic process	14	0.0621846	ENSG00000110955, ENSG00000075239, ENSG00000068078, ENSG00000155189, ENSG00000132329, ENSG00000173175, ENSG00000114956, ENSG00000104879, ENSG00000120937, ENSG00000138675, ENSG00000152234, ENSG00000156471, ENSG00000107242, ENSG00000162882	1.73415	1	0.631031	0.610093
Heart	GroupB	GO:0006084~acetyl-CoA metabolic process	3	0.0623031	ENSG00000075239, ENSG00000076555, ENSG00000154930	7.32955	1	0.631031	0.610093
Heart	GroupB	GO:0009101~glycoprotein biosynthetic process	10	0.0632052	ENSG00000257594, ENSG00000100626, ENSG00000159063, ENSG00000133424, ENSG00000187097, ENSG00000132329, ENSG00000169255, ENSG00000110080, ENSG00000180509, ENSG00000012232	2.00148	1	0.637483	0.616331
Heart	GroupB	GO:0035384~thioester biosynthetic process	4	0.0634559	ENSG00000075239, ENSG00000076555, ENSG00000165996, ENSG00000154930	4.36014	1	0.637483	0.616331
Heart	GroupB	GO:0071616~acyl-CoA biosynthetic process	4	0.0634559	ENSG00000075239, ENSG00000076555, ENSG00000165996, ENSG00000154930	4.36014	1	0.637483	0.616331
Heart	GroupB	GO:0014902~myotube differentiation	5	0.064182	ENSG00000157119, ENSG00000176697, ENSG00000141052, ENSG00000182533, ENSG00000152413	3.31086	1	0.643034	0.621698
Heart	GroupB	GO:0016052~carbohydrate catabolic process	6	0.064996	ENSG00000106633, ENSG00000109107, ENSG00000187097, ENSG00000165140, ENSG00000067057, ENSG00000163754	2.77852	1	0.649435	0.627886
Heart	GroupB	GO:0014896~muscle hypertrophy	4	0.0658161	ENSG00000129170, ENSG00000198626, ENSG00000155657, ENSG00000182533	4.29408	1	0.655861	0.634099
Heart	GroupB	GO:0008283~cell proliferation	35	0.0663581	ENSG00000130037, ENSG00000213145, ENSG00000105997, ENSG00000112667, ENSG00000179388, ENSG00000136235, ENSG00000204472, ENSG00000106809, ENSG00000057294, ENSG00000138675, ENSG00000130176, ENSG00000185290, ENSG00000187097, ENSG00000085662, ENSG00000141052, ENSG00000005020, ENSG00000109099, ENSG00000164532, ENSG00000103034, ENSG00000068078, ENSG00000138448, ENSG00000196139, ENSG00000158435, ENSG0000…	1.33253	1	0.659489	0.637607
Heart	GroupB	GO:0032387~negative regulation of intracellular transport	5	0.0677438	ENSG00000109846, ENSG00000180509, ENSG00000130528, ENSG00000198523, ENSG00000171033	3.25011	1	0.666595	0.644477
Heart	GroupB	GO:0098914~membrane repolarization during atrial cardiac muscle cell action potential	2	0.0683318	ENSG00000080709, ENSG00000130037	28.3409	1	0.666595	0.644477
Heart	GroupB	GO:0010991~negative regulation of SMAD protein complex assembly	2	0.0683318	ENSG00000168675, ENSG00000164532	28.3409	1	0.666595	0.644477
Heart	GroupB	GO:0031547~brain-derived neurotrophic factor receptor signaling pathway	2	0.0683318	ENSG00000176697, ENSG00000053108	28.3409	1	0.666595	0.644477
Heart	GroupB	GO:1901660~calcium ion export	2	0.0683318	ENSG00000176273, ENSG00000183023	28.3409	1	0.666595	0.644477
Heart	GroupB	GO:0086029~Purkinje myocyte to ventricular cardiac muscle cell signaling	2	0.0683318	ENSG00000118729, ENSG00000198626	28.3409	1	0.666595	0.644477
Heart	GroupB	GO:0098735~positive regulation of the force of heart contraction	2	0.0683318	ENSG00000183023, ENSG00000198626	28.3409	1	0.666595	0.644477
Heart	GroupB	GO:0044272~sulfur compound biosynthetic process	7	0.0688479	ENSG00000075239, ENSG00000076555, ENSG00000110080, ENSG00000012232, ENSG00000165996, ENSG00000106809, ENSG00000154930	2.43121	1	0.669867	0.647641
Heart	GroupB	GO:0044091~membrane biogenesis	3	0.070079	ENSG00000170558, ENSG00000182533, ENSG00000197747	6.85668	1	0.678284	0.655779
Heart	GroupB	GO:0006007~glucose catabolic process	3	0.070079	ENSG00000106633, ENSG00000109107, ENSG00000067057	6.85668	1	0.678284	0.655779
Heart	GroupB	GO:0030041~actin filament polymerization	6	0.0709457	ENSG00000163171, ENSG00000163380, ENSG00000112290, ENSG00000204472, ENSG00000134775, ENSG00000136842	2.70773	1	0.678723	0.656203
Heart	GroupB	GO:0050793~regulation of developmental process	39	0.071069	ENSG00000154122, ENSG00000073711, ENSG00000113739, ENSG00000176697, ENSG00000179388, ENSG00000136235, ENSG00000134313, ENSG00000106809, ENSG00000135424, ENSG00000187098, ENSG00000080371, ENSG00000168675, ENSG00000141052, ENSG00000119729, ENSG00000107371, ENSG00000109099, ENSG00000164532, ENSG00000103034, ENSG00000138829, ENSG00000068078, ENSG00000114999, ENSG00000064012, ENSG00000076555, ENSG0000…	1.29791	1	0.678723	0.656203
Heart	GroupB	GO:0030260~entry into host cell	5	0.071406	ENSG00000143324, ENSG00000085832, ENSG00000204655, ENSG00000138448, ENSG00000112343	3.19155	1	0.678723	0.656203
Heart	GroupB	GO:0046718~viral entry into host cell	5	0.071406	ENSG00000143324, ENSG00000085832, ENSG00000204655, ENSG00000138448, ENSG00000112343	3.19155	1	0.678723	0.656203
Heart	GroupB	GO:0051828~entry into other organism involved in symbiotic interaction	5	0.071406	ENSG00000143324, ENSG00000085832, ENSG00000204655, ENSG00000138448, ENSG00000112343	3.19155	1	0.678723	0.656203
Heart	GroupB	GO:0051806~entry into cell of other organism involved in symbiotic interaction	5	0.071406	ENSG00000143324, ENSG00000085832, ENSG00000204655, ENSG00000138448, ENSG00000112343	3.19155	1	0.678723	0.656203
Heart	GroupB	GO:0044409~entry into host	5	0.071406	ENSG00000143324, ENSG00000085832, ENSG00000204655, ENSG00000138448, ENSG00000112343	3.19155	1	0.678723	0.656203
Heart	GroupB	GO:0044085~cellular component biogenesis	51	0.0721262	ENSG00000130037, ENSG00000113615, ENSG00000118194, ENSG00000171385, ENSG00000204472, ENSG00000155657, ENSG00000187098, ENSG00000165140, ENSG00000184185, ENSG00000005020, ENSG00000160293, ENSG00000119729, ENSG00000107371, ENSG00000123545, ENSG00000184983, ENSG00000164532, ENSG00000035403, ENSG00000013016, ENSG00000076555, ENSG00000064012, ENSG00000129170, ENSG00000253797, ENSG00000163171, ENSG0000…	1.24004	1	0.683569	0.660887
Heart	GroupB	GO:0072659~protein localization to plasma membrane	7	0.0724674	ENSG00000170558, ENSG00000132329, ENSG00000119729, ENSG00000057294, ENSG00000182533, ENSG00000197747, ENSG00000013016	2.39597	1	0.683569	0.660887
Heart	GroupB	GO:0051701~interaction with host	6	0.072469	ENSG00000143324, ENSG00000085832, ENSG00000204655, ENSG00000064012, ENSG00000138448, ENSG00000112343	2.69059	1	0.683569	0.660887
Heart	GroupB	GO:0009132~nucleoside diphosphate metabolic process	5	0.0732744	ENSG00000106633, ENSG00000109107, ENSG00000187097, ENSG00000165140, ENSG00000067057	3.16305	1	0.689412	0.666537
Heart	GroupB	GO:0015988~energy coupled proton transmembrane transport, against electrochemical gradient	3	0.0740798	ENSG00000110955, ENSG00000105409, ENSG00000152234	6.64241	1	0.693469	0.67046
Heart	GroupB	GO:0015991~ATP hydrolysis coupled proton transport	3	0.0740798	ENSG00000110955, ENSG00000105409, ENSG00000152234	6.64241	1	0.693469	0.67046
Heart	GroupB	GO:0019752~carboxylic acid metabolic process	18	0.0748992	ENSG00000075239, ENSG00000109107, ENSG00000106633, ENSG00000067057, ENSG00000076555, ENSG00000103876, ENSG00000196139, ENSG00000154930, ENSG00000187097, ENSG00000165140, ENSG00000205678, ENSG00000079215, ENSG00000108242, ENSG00000100412, ENSG00000155380, ENSG00000162882, ENSG00000165996, ENSG00000145861	1.544	1	0.699374	0.676168
Heart	GroupB	GO:0051493~regulation of cytoskeleton organization	11	0.0757204	ENSG00000163171, ENSG00000163380, ENSG00000112290, ENSG00000119729, ENSG00000162614, ENSG00000180834, ENSG00000134775, ENSG00000182533, ENSG00000136842, ENSG00000197747, ENSG00000167657	1.84686	1	0.705265	0.681864
Heart	GroupB	GO:0044281~small molecule metabolic process	36	0.0771442	ENSG00000075239, ENSG00000067057, ENSG00000112667, ENSG00000103876, ENSG00000154269, ENSG00000187097, ENSG00000085662, ENSG00000165140, ENSG00000119729, ENSG00000108242, ENSG00000184983, ENSG00000110955, ENSG00000106633, ENSG00000109107, ENSG00000135917, ENSG00000132329, ENSG00000076555, ENSG00000173175, ENSG00000114956, ENSG00000120937, ENSG00000196139, ENSG00000198911, ENSG00000152234, ENSG0000…	1.30737	1	0.716725	0.692944
Heart	GroupB	GO:0006110~regulation of glycolytic process	3	0.078152	ENSG00000106633, ENSG00000187097, ENSG00000165140	6.44112	1	0.723976	0.699954
Heart	GroupB	GO:0043436~oxoacid metabolic process	18	0.0783152	ENSG00000075239, ENSG00000109107, ENSG00000106633, ENSG00000067057, ENSG00000076555, ENSG00000103876, ENSG00000196139, ENSG00000154930, ENSG00000187097, ENSG00000165140, ENSG00000205678, ENSG00000079215, ENSG00000108242, ENSG00000100412, ENSG00000155380, ENSG00000162882, ENSG00000165996, ENSG00000145861	1.53471	1	0.723976	0.699954
Heart	GroupB	GO:0060419~heart growth	4	0.0807973	ENSG00000076555, ENSG00000164532, ENSG00000182533, ENSG00000103034	3.93624	1	0.739852	0.715304
Heart	GroupB	GO:1901888~regulation of cell junction assembly	4	0.0807973	ENSG00000107263, ENSG00000057294, ENSG00000197747, ENSG00000167657	3.93624	1	0.739852	0.715304
Heart	GroupB	GO:0034766~negative regulation of ion transmembrane transport	4	0.0807973	ENSG00000180509, ENSG00000198523, ENSG00000118729, ENSG00000182533	3.93624	1	0.739852	0.715304
Heart	GroupB	GO:0031333~negative regulation of protein complex assembly	5	0.080994	ENSG00000168675, ENSG00000163380, ENSG00000164532, ENSG00000134775, ENSG00000136842	3.05398	1	0.739852	0.715304
Heart	GroupB	GO:0099624~atrial cardiac muscle cell membrane repolarization	2	0.0814297	ENSG00000080709, ENSG00000130037	23.6174	1	0.739852	0.715304
Heart	GroupB	GO:0010990~regulation of SMAD protein complex assembly	2	0.0814297	ENSG00000168675, ENSG00000164532	23.6174	1	0.739852	0.715304
Heart	GroupB	GO:0086068~Purkinje myocyte to ventricular cardiac muscle cell communication	2	0.0814297	ENSG00000118729, ENSG00000198626	23.6174	1	0.739852	0.715304
Heart	GroupB	GO:0005975~carbohydrate metabolic process	17	0.0825852	ENSG00000257594, ENSG00000133424, ENSG00000109107, ENSG00000106633, ENSG00000132329, ENSG00000067057, ENSG00000076555, ENSG00000100626, ENSG00000159063, ENSG00000187097, ENSG00000085662, ENSG00000165140, ENSG00000169255, ENSG00000180509, ENSG00000110080, ENSG00000145861, ENSG00000163754	1.54819	1	0.748516	0.72368
Heart	GroupB	GO:0045445~myoblast differentiation	4	0.0834263	ENSG00000100628, ENSG00000141052, ENSG00000129170, ENSG00000115884	3.88232	1	0.753555	0.728552
Heart	GroupB	GO:0042325~regulation of phosphorylation	27	0.0835477	ENSG00000136235, ENSG00000134452, ENSG00000204472, ENSG00000134313, ENSG00000155657, ENSG00000168675, ENSG00000141198, ENSG00000187097, ENSG00000141052, ENSG00000165140, ENSG00000160293, ENSG00000130528, ENSG00000176490, ENSG00000184545, ENSG00000103034, ENSG00000106633, ENSG00000068078, ENSG00000173175, ENSG00000171033, ENSG00000136045, ENSG00000170558, ENSG00000052795, ENSG00000107263, ENSG0000…	1.3733	1	0.753555	0.728552
Heart	GroupB	GO:0007204~positive regulation of cytosolic calcium ion concentration	8	0.0847037	ENSG00000104369, ENSG00000173175, ENSG00000183023, ENSG00000130528, ENSG00000198523, ENSG00000118729, ENSG00000198626, ENSG00000182533	2.10713	1	0.762075	0.736789
Heart	GroupB	GO:0036211~protein modification process	64	0.085109	ENSG00000157119, ENSG00000133424, ENSG00000073711, ENSG00000150401, ENSG00000204472, ENSG00000175946, ENSG00000134313, ENSG00000138675, ENSG00000155657, ENSG00000187098, ENSG00000100628, ENSG00000100626, ENSG00000187097, ENSG00000203740, ENSG00000141052, ENSG00000169902, ENSG00000184545, ENSG00000257594, ENSG00000173175, ENSG00000171033, ENSG00000138448, ENSG00000058091, ENSG00000058056, ENSG0000…	1.18768	1	0.762075	0.736789
Heart	GroupB	GO:0006464~cellular protein modification process	64	0.085109	ENSG00000157119, ENSG00000133424, ENSG00000073711, ENSG00000150401, ENSG00000204472, ENSG00000175946, ENSG00000134313, ENSG00000138675, ENSG00000155657, ENSG00000187098, ENSG00000100628, ENSG00000100626, ENSG00000187097, ENSG00000203740, ENSG00000141052, ENSG00000169902, ENSG00000184545, ENSG00000257594, ENSG00000173175, ENSG00000171033, ENSG00000138448, ENSG00000058091, ENSG00000058056, ENSG0000…	1.18768	1	0.762075	0.736789
Heart	GroupB	GO:0051147~regulation of muscle cell differentiation	6	0.0853175	ENSG00000170558, ENSG00000176697, ENSG00000141052, ENSG00000129170, ENSG00000182533, ENSG00000124882	2.56093	1	0.762101	0.736814
Heart	GroupB	GO:0048661~positive regulation of smooth muscle cell proliferation	4	0.0860916	ENSG00000085662, ENSG00000204472, ENSG00000125257, ENSG00000124882	3.82986	1	0.767167	0.741712
Heart	GroupB	GO:0003009~skeletal muscle contraction	3	0.0864995	ENSG00000159173, ENSG00000198125, ENSG00000152413	6.07306	1	0.768953	0.743439
Heart	GroupB	GO:0034332~adherens junction organization	5	0.0870375	ENSG00000170558, ENSG00000057294, ENSG00000035403, ENSG00000197747, ENSG00000167657	2.97699	1	0.770043	0.744493
Heart	GroupB	GO:0051494~negative regulation of cytoskeleton organization	5	0.0870375	ENSG00000163380, ENSG00000180834, ENSG00000134775, ENSG00000182533, ENSG00000136842	2.97699	1	0.770043	0.744493
Heart	GroupB	GO:0009991~response to extracellular stimulus	11	0.087902	ENSG00000075239, ENSG00000113739, ENSG00000141052, ENSG00000076555, ENSG00000183023, ENSG00000204472, ENSG00000155380, ENSG00000108576, ENSG00000196139, ENSG00000198911, ENSG00000185290	1.79167	1	0.775698	0.74996
Heart	GroupB	GO:0043254~regulation of protein complex assembly	10	0.0880952	ENSG00000187098, ENSG00000168675, ENSG00000163171, ENSG00000163380, ENSG00000112290, ENSG00000052795, ENSG00000164532, ENSG00000134775, ENSG00000182533, ENSG00000136842	1.85964	1	0.775698	0.74996
Heart	GroupB	GO:0006082~organic acid metabolic process	19	0.0886985	ENSG00000075239, ENSG00000109107, ENSG00000106633, ENSG00000067057, ENSG00000076555, ENSG00000103876, ENSG00000196139, ENSG00000112992, ENSG00000154930, ENSG00000187097, ENSG00000165140, ENSG00000205678, ENSG00000079215, ENSG00000108242, ENSG00000100412, ENSG00000155380, ENSG00000162882, ENSG00000165996, ENSG00000145861	1.48423	1	0.778144	0.752325
Heart	GroupB	GO:0045913~positive regulation of carbohydrate metabolic process	4	0.0887928	ENSG00000106633, ENSG00000187097, ENSG00000132329, ENSG00000145861	3.77879	1	0.778144	0.752325
Heart	GroupB	GO:1901700~response to oxygen-containing compound	28	0.0890063	ENSG00000130037, ENSG00000103994, ENSG00000113739, ENSG00000198125, ENSG00000198523, ENSG00000204472, ENSG00000156804, ENSG00000198626, ENSG00000085662, ENSG00000180509, ENSG00000119729, ENSG00000109846, ENSG00000106633, ENSG00000064012, ENSG00000173175, ENSG00000197763, ENSG00000198797, ENSG00000105409, ENSG00000196139, ENSG00000115884, ENSG00000152413, ENSG00000121671, ENSG00000183023, ENSG0000…	1.35325	1	0.778176	0.752355
Heart	GroupB	GO:0090662~ATP hydrolysis coupled transmembrane transport	3	0.0907694	ENSG00000110955, ENSG00000105409, ENSG00000152234	5.90436	1	0.791723	0.765453
Heart	GroupB	GO:0019319~hexose biosynthetic process	4	0.0915294	ENSG00000106633, ENSG00000109107, ENSG00000085662, ENSG00000165140	3.72907	1	0.796477	0.77005
Heart	GroupB	GO:1901897~regulation of relaxation of cardiac muscle	2	0.0943441	ENSG00000130528, ENSG00000198523	20.2435	1	0.813334	0.786347
Heart	GroupB	GO:1901894~regulation of calcium-transporting ATPase activity	2	0.0943441	ENSG00000198523, ENSG00000198626	20.2435	1	0.813334	0.786347
Heart	GroupB	GO:2001256~regulation of store-operated calcium entry	2	0.0943441	ENSG00000113739, ENSG00000152413	20.2435	1	0.813334	0.786347
Heart	GroupB	GO:0051694~pointed-end actin filament capping	2	0.0943441	ENSG00000163380, ENSG00000136842	20.2435	1	0.813334	0.786347
Heart	GroupB	GO:0006734~NADH metabolic process	3	0.0951001	ENSG00000106633, ENSG00000109107, ENSG00000067057	5.74478	1	0.817949	0.790809
Heart	GroupB	GO:0007009~plasma membrane organization	8	0.0969934	ENSG00000170558, ENSG00000132329, ENSG00000165912, ENSG00000119729, ENSG00000057294, ENSG00000182533, ENSG00000197747, ENSG00000013016	2.04628	1	0.826289	0.798872
Heart	GroupB	GO:0050848~regulation of calcium-mediated signaling	4	0.0971063	ENSG00000104369, ENSG00000130528, ENSG00000198523, ENSG00000118729	3.63345	1	0.826289	0.798872
Heart	GroupB	GO:0034763~negative regulation of transmembrane transport	4	0.0971063	ENSG00000180509, ENSG00000198523, ENSG00000118729, ENSG00000182533	3.63345	1	0.826289	0.798872
Heart	GroupB	GO:0048518~positive regulation of biological process	85	0.0973801	ENSG00000130037, ENSG00000084090, ENSG00000073711, ENSG00000105997, ENSG00000113615, ENSG00000179388, ENSG00000150401, ENSG00000204472, ENSG00000134313, ENSG00000198626, ENSG00000138675, ENSG00000187098, ENSG00000080371, ENSG00000187097, ENSG00000119922, ENSG00000085662, ENSG00000141052, ENSG00000005020, ENSG00000160293, ENSG00000119729, ENSG00000107371, ENSG00000164532, ENSG00000013016, ENSG0000…	1.13954	1	0.826289	0.798872
Heart	GroupB	GO:0008361~regulation of cell size	6	0.0974337	ENSG00000080371, ENSG00000176697, ENSG00000114999, ENSG00000160293, ENSG00000182533, ENSG00000053108	2.45731	1	0.826289	0.798872
Heart	GroupB	GO:0006109~regulation of carbohydrate metabolic process	6	0.0974337	ENSG00000106633, ENSG00000187097, ENSG00000132329, ENSG00000165140, ENSG00000076555, ENSG00000145861	2.45731	1	0.826289	0.798872
Heart	GroupB	GO:1901699~cellular response to nitrogen compound	13	0.09763	ENSG00000103994, ENSG00000106633, ENSG00000173175, ENSG00000204472, ENSG00000198626, ENSG00000085662, ENSG00000180509, ENSG00000119729, ENSG00000183023, ENSG00000118729, ENSG00000107263, ENSG00000123358, ENSG00000108576	1.65068	1	0.826289	0.798872
Heart	GroupB	GO:0045333~cellular respiration	6	0.0993694	ENSG00000189043, ENSG00000128609, ENSG00000100412, ENSG00000184983, ENSG00000126267, ENSG00000112992	2.44318	1	0.838942	0.811106
Heart	GroupB	GO:1902589~single-organism organelle organization	30	0.0995777	ENSG00000170390, ENSG00000118194, ENSG00000204472, ENSG00000134775, ENSG00000057294, ENSG00000155657, ENSG00000130176, ENSG00000172159, ENSG00000171877, ENSG00000163380, ENSG00000182263, ENSG00000119729, ENSG00000013016, ENSG00000109846, ENSG00000154153, ENSG00000114999, ENSG00000064012, ENSG00000129170, ENSG00000136842, ENSG00000197747, ENSG00000163171, ENSG00000138162, ENSG00000112290, ENSG0000…	1.31859	1	0.838942	0.811106
Heart	GroupC	GO:0030029~actin filament-based process	25	1.44088e-11	ENSG00000158769, ENSG00000136574, ENSG00000160808, ENSG00000134278, ENSG00000183072, ENSG00000168334, ENSG00000061676, ENSG00000158286, ENSG00000130529, ENSG00000055118, ENSG00000095637, ENSG00000183873, ENSG00000166317, ENSG00000088280, ENSG00000053918, ENSG00000173991, ENSG00000198336, ENSG00000114854, ENSG00000155846, ENSG00000112137, ENSG00000196535, ENSG00000114279, ENSG00000154358, ENSG0000…	5.47985	3.65984e-08	3.46601e-08	3.35684e-08
Heart	GroupC	GO:0060048~cardiac muscle contraction	13	2.72914e-11	ENSG00000053918, ENSG00000173991, ENSG00000198336, ENSG00000114854, ENSG00000136574, ENSG00000160808, ENSG00000114279, ENSG00000138622, ENSG00000183072, ENSG00000158286, ENSG00000130529, ENSG00000055118, ENSG00000183873	15.9573	6.93201e-08	3.46601e-08	3.35684e-08
Heart	GroupC	GO:0006941~striated muscle contraction	14	5.95971e-11	ENSG00000053918, ENSG00000173991, ENSG00000198771, ENSG00000198336, ENSG00000114854, ENSG00000136574, ENSG00000160808, ENSG00000114279, ENSG00000138622, ENSG00000183072, ENSG00000158286, ENSG00000130529, ENSG00000055118, ENSG00000183873	12.8085	1.51377e-07	5.04589e-08	4.88696e-08
Heart	GroupC	GO:0070252~actin-mediated cell contraction	11	1.32574e-09	ENSG00000053918, ENSG00000173991, ENSG00000158286, ENSG00000198336, ENSG00000114854, ENSG00000130529, ENSG00000055118, ENSG00000160808, ENSG00000183873, ENSG00000114279, ENSG00000138622	16.2028	3.36738e-06	6.95196e-07	6.733e-07
Heart	GroupC	GO:0030048~actin filament-based movement	12	1.3685e-09	ENSG00000053918, ENSG00000173991, ENSG00000158286, ENSG00000198336, ENSG00000114854, ENSG00000130529, ENSG00000055118, ENSG00000136574, ENSG00000160808, ENSG00000183873, ENSG00000114279, ENSG00000138622	13.3907	3.47598e-06	6.95196e-07	6.733e-07
Heart	GroupC	GO:0003012~muscle system process	18	1.72467e-09	ENSG00000053918, ENSG00000173991, ENSG00000198771, ENSG00000198336, ENSG00000114854, ENSG00000077157, ENSG00000136574, ENSG00000160808, ENSG00000114279, ENSG00000138622, ENSG00000163110, ENSG00000183072, ENSG00000158286, ENSG00000119508, ENSG00000130529, ENSG00000055118, ENSG00000095637, ENSG00000183873	6.54659	4.38066e-06	7.30111e-07	7.07116e-07
Heart	GroupC	GO:0060047~heart contraction	14	1.04144e-08	ENSG00000053918, ENSG00000173991, ENSG00000198336, ENSG00000114854, ENSG00000136574, ENSG00000160808, ENSG00000114279, ENSG00000138622, ENSG00000183072, ENSG00000168135, ENSG00000158286, ENSG00000130529, ENSG00000055118, ENSG00000183873	8.41704	2.64522e-05	3.77893e-06	3.65991e-06
Heart	GroupC	GO:0003015~heart process	14	1.2045e-08	ENSG00000053918, ENSG00000173991, ENSG00000198336, ENSG00000114854, ENSG00000136574, ENSG00000160808, ENSG00000114279, ENSG00000138622, ENSG00000183072, ENSG00000168135, ENSG00000158286, ENSG00000130529, ENSG00000055118, ENSG00000183873	8.31522	3.05938e-05	3.82428e-06	3.70383e-06
Heart	GroupC	GO:0006936~muscle contraction	15	4.80599e-08	ENSG00000053918, ENSG00000173991, ENSG00000198771, ENSG00000198336, ENSG00000114854, ENSG00000136574, ENSG00000160808, ENSG00000114279, ENSG00000138622, ENSG00000183072, ENSG00000158286, ENSG00000130529, ENSG00000055118, ENSG00000095637, ENSG00000183873	6.67515	0.000122065	1.35636e-05	1.31364e-05
Heart	GroupC	GO:0003013~circulatory system process	17	3.04224e-07	ENSG00000158769, ENSG00000053918, ENSG00000173991, ENSG00000177000, ENSG00000198336, ENSG00000114854, ENSG00000136574, ENSG00000160808, ENSG00000114279, ENSG00000138622, ENSG00000173706, ENSG00000183072, ENSG00000168135, ENSG00000158286, ENSG00000130529, ENSG00000055118, ENSG00000183873	4.90994	0.000772432	7.7273e-05	7.48392e-05
Heart	GroupC	GO:0051239~regulation of multicellular organismal process	40	7.99517e-07	ENSG00000158769, ENSG00000107317, ENSG00000178573, ENSG00000077157, ENSG00000136574, ENSG00000160808, ENSG00000178878, ENSG00000175745, ENSG00000140682, ENSG00000143434, ENSG00000113296, ENSG00000183072, ENSG00000086015, ENSG00000168135, ENSG00000119508, ENSG00000158286, ENSG00000107130, ENSG00000164932, ENSG00000130529, ENSG00000055118, ENSG00000183873, ENSG00000108840, ENSG00000141699, ENSG0000…	2.21584	0.00202871	0.000172633	0.000167196
Heart	GroupC	GO:0006937~regulation of muscle contraction	10	8.15589e-07	ENSG00000183072, ENSG00000053918, ENSG00000158286, ENSG00000114854, ENSG00000077157, ENSG00000130529, ENSG00000136574, ENSG00000160808, ENSG00000183873, ENSG00000138622	9.75485	0.00206945	0.000172633	0.000167196
Heart	GroupC	GO:0090257~regulation of muscle system process	11	8.96271e-07	ENSG00000183072, ENSG00000053918, ENSG00000158286, ENSG00000119508, ENSG00000114854, ENSG00000077157, ENSG00000130529, ENSG00000136574, ENSG00000160808, ENSG00000183873, ENSG00000138622	8.18324	0.00227394	0.000175118	0.000169602
Heart	GroupC	GO:0008015~blood circulation	16	1.49608e-06	ENSG00000158769, ENSG00000053918, ENSG00000173991, ENSG00000177000, ENSG00000198336, ENSG00000114854, ENSG00000136574, ENSG00000160808, ENSG00000114279, ENSG00000138622, ENSG00000183072, ENSG00000168135, ENSG00000158286, ENSG00000130529, ENSG00000055118, ENSG00000183873	4.65765	0.00379283	0.000271431	0.000262882
Heart	GroupC	GO:0086003~cardiac muscle cell contraction	7	1.80082e-06	ENSG00000053918, ENSG00000158286, ENSG00000130529, ENSG00000055118, ENSG00000183873, ENSG00000114279, ENSG00000138622	18.747	0.00456365	0.000303158	0.000293609
Heart	GroupC	GO:0006942~regulation of striated muscle contraction	8	1.94316e-06	ENSG00000183072, ENSG00000053918, ENSG00000158286, ENSG00000130529, ENSG00000136574, ENSG00000160808, ENSG00000183873, ENSG00000138622	13.5447	0.00492346	0.000303158	0.000293609
Heart	GroupC	GO:0061061~muscle structure development	17	2.02901e-06	ENSG00000173991, ENSG00000114854, ENSG00000170681, ENSG00000136574, ENSG00000160808, ENSG00000198812, ENSG00000154358, ENSG00000112183, ENSG00000163110, ENSG00000173706, ENSG00000183072, ENSG00000157240, ENSG00000141161, ENSG00000063660, ENSG00000163833, ENSG00000108840, ENSG00000122367	4.25139	0.00514043	0.000303158	0.000293609
Heart	GroupC	GO:0008016~regulation of heart contraction	11	3.88623e-06	ENSG00000183072, ENSG00000053918, ENSG00000168135, ENSG00000158286, ENSG00000198336, ENSG00000130529, ENSG00000055118, ENSG00000136574, ENSG00000160808, ENSG00000183873, ENSG00000138622	6.95399	0.00982249	0.00054839	0.000531118
Heart	GroupC	GO:0086001~cardiac muscle cell action potential	7	4.85839e-06	ENSG00000053918, ENSG00000158286, ENSG00000130529, ENSG00000055118, ENSG00000183873, ENSG00000114279, ENSG00000138622	15.8629	0.0122645	0.00064949	0.000629034
Heart	GroupC	GO:0006928~movement of cell or subcellular component	30	5.39529e-06	ENSG00000158769, ENSG00000108947, ENSG00000112245, ENSG00000136574, ENSG00000130294, ENSG00000160808, ENSG00000143434, ENSG00000113296, ENSG00000119508, ENSG00000158286, ENSG00000164932, ENSG00000130529, ENSG00000055118, ENSG00000183873, ENSG00000108840, ENSG00000163820, ENSG00000198053, ENSG00000088280, ENSG00000053918, ENSG00000173991, ENSG00000198336, ENSG00000114854, ENSG00000112137, ENSG0000…	2.46181	0.0136106	0.000685202	0.000663621
Heart	GroupC	GO:1903115~regulation of actin filament-based movement	6	6.05598e-06	ENSG00000158286, ENSG00000114854, ENSG00000130529, ENSG00000136574, ENSG00000183873, ENSG00000138622	22.6613	0.0152645	0.000732486	0.000709415
Heart	GroupC	GO:0086002~cardiac muscle cell action potential involved in contraction	6	8.80497e-06	ENSG00000053918, ENSG00000158286, ENSG00000130529, ENSG00000055118, ENSG00000183873, ENSG00000114279	21.0426	0.0221165	0.00101657	0.000984555
Heart	GroupC	GO:0055117~regulation of cardiac muscle contraction	7	1.03742e-05	ENSG00000183072, ENSG00000053918, ENSG00000158286, ENSG00000130529, ENSG00000136574, ENSG00000183873, ENSG00000138622	13.9336	0.0260065	0.00114567	0.00110959
Heart	GroupC	GO:0044057~regulation of system process	14	3.41746e-05	ENSG00000053918, ENSG00000198336, ENSG00000114854, ENSG00000077157, ENSG00000136574, ENSG00000160808, ENSG00000138622, ENSG00000183072, ENSG00000168135, ENSG00000158286, ENSG00000119508, ENSG00000130529, ENSG00000055118, ENSG00000183873	4.09162	0.083144	0.00343295	0.00332483
Heart	GroupC	GO:1903522~regulation of blood circulation	11	3.49552e-05	ENSG00000183072, ENSG00000053918, ENSG00000168135, ENSG00000158286, ENSG00000198336, ENSG00000130529, ENSG00000055118, ENSG00000136574, ENSG00000160808, ENSG00000183873, ENSG00000138622	5.40094	0.0849602	0.00343295	0.00332483
Heart	GroupC	GO:0086019~cell-cell signaling involved in cardiac conduction	5	3.51405e-05	ENSG00000053918, ENSG00000158286, ENSG00000130529, ENSG00000183873, ENSG00000138622	26.3033	0.0853908	0.00343295	0.00332483
Heart	GroupC	GO:0007507~heart development	14	3.93977e-05	ENSG00000173991, ENSG00000114854, ENSG00000136574, ENSG00000160808, ENSG00000198812, ENSG00000114279, ENSG00000163110, ENSG00000173706, ENSG00000183072, ENSG00000168334, ENSG00000203867, ENSG00000157240, ENSG00000158286, ENSG00000183873	4.03557	0.0952279	0.0037063	0.00358957
Heart	GroupC	GO:0061337~cardiac conduction	7	4.88199e-05	ENSG00000053918, ENSG00000168135, ENSG00000158286, ENSG00000130529, ENSG00000055118, ENSG00000183873, ENSG00000138622	10.6298	0.116625	0.00442867	0.00428918
Heart	GroupC	GO:0072358~cardiovascular system development	19	5.78233e-05	ENSG00000053918, ENSG00000173991, ENSG00000114854, ENSG00000136574, ENSG00000160808, ENSG00000198812, ENSG00000114279, ENSG00000178878, ENSG00000166145, ENSG00000163110, ENSG00000113296, ENSG00000173706, ENSG00000183072, ENSG00000168334, ENSG00000203867, ENSG00000157240, ENSG00000158286, ENSG00000183873, ENSG00000108840	2.96155	0.136599	0.00487469	0.00472116
Heart	GroupC	GO:0072359~circulatory system development	19	5.78233e-05	ENSG00000053918, ENSG00000173991, ENSG00000114854, ENSG00000136574, ENSG00000160808, ENSG00000198812, ENSG00000114279, ENSG00000178878, ENSG00000166145, ENSG00000163110, ENSG00000113296, ENSG00000173706, ENSG00000183072, ENSG00000168334, ENSG00000203867, ENSG00000157240, ENSG00000158286, ENSG00000183873, ENSG00000108840	2.96155	0.136599	0.00487469	0.00472116
Heart	GroupC	GO:0031032~actomyosin structure organization	8	6.08032e-05	ENSG00000158769, ENSG00000183072, ENSG00000173991, ENSG00000095637, ENSG00000112137, ENSG00000196535, ENSG00000122367, ENSG00000154358	8.01623	0.143109	0.00487469	0.00472116
Heart	GroupC	GO:0044767~single-organism developmental process	58	6.14134e-05	ENSG00000158769, ENSG00000108947, ENSG00000178573, ENSG00000112245, ENSG00000136574, ENSG00000160808, ENSG00000112561, ENSG00000175745, ENSG00000140682, ENSG00000143434, ENSG00000113296, ENSG00000168334, ENSG00000203867, ENSG00000188026, ENSG00000158286, ENSG00000107130, ENSG00000164932, ENSG00000141699, ENSG00000053918, ENSG00000114854, ENSG00000155846, ENSG00000198812, ENSG00000154358, ENSG0000…	1.56042	0.144436	0.00487469	0.00472116
Heart	GroupC	GO:0086091~regulation of heart rate by cardiac conduction	5	8.66613e-05	ENSG00000053918, ENSG00000130529, ENSG00000055118, ENSG00000183873, ENSG00000138622	21.0426	0.197585	0.00621118	0.00601555
Heart	GroupC	GO:0086004~regulation of cardiac muscle cell contraction	5	8.66613e-05	ENSG00000158286, ENSG00000130529, ENSG00000136574, ENSG00000183873, ENSG00000138622	21.0426	0.197585	0.00621118	0.00601555
Heart	GroupC	GO:0030036~actin cytoskeleton organization	14	8.79538e-05	ENSG00000158769, ENSG00000088280, ENSG00000173991, ENSG00000155846, ENSG00000112137, ENSG00000196535, ENSG00000134278, ENSG00000154358, ENSG00000183072, ENSG00000168334, ENSG00000061676, ENSG00000095637, ENSG00000122367, ENSG00000166317	3.72907	0.200215	0.00621118	0.00601555
Heart	GroupC	GO:0032970~regulation of actin filament-based process	11	8.80324e-05	ENSG00000158769, ENSG00000088280, ENSG00000061676, ENSG00000158286, ENSG00000114854, ENSG00000130529, ENSG00000136574, ENSG00000183873, ENSG00000134278, ENSG00000166317, ENSG00000138622	4.83666	0.200375	0.00621118	0.00601555
Heart	GroupC	GO:0060415~muscle tissue morphogenesis	6	0.000131729	ENSG00000173706, ENSG00000183072, ENSG00000173991, ENSG00000157240, ENSG00000114854, ENSG00000160808	12.1067	0.284386	0.00904304	0.00875822
Heart	GroupC	GO:0003231~cardiac ventricle development	7	0.00014522	ENSG00000173706, ENSG00000183072, ENSG00000157240, ENSG00000114854, ENSG00000136574, ENSG00000160808, ENSG00000183873	8.73803	0.308495	0.00954963	0.00924885
Heart	GroupC	GO:0032502~developmental process	58	0.000146628	ENSG00000158769, ENSG00000108947, ENSG00000178573, ENSG00000112245, ENSG00000136574, ENSG00000160808, ENSG00000112561, ENSG00000175745, ENSG00000140682, ENSG00000143434, ENSG00000113296, ENSG00000168334, ENSG00000203867, ENSG00000188026, ENSG00000158286, ENSG00000107130, ENSG00000164932, ENSG00000141699, ENSG00000053918, ENSG00000114854, ENSG00000155846, ENSG00000198812, ENSG00000154358, ENSG0000…	1.51692	0.310965	0.00954963	0.00924885
Heart	GroupC	GO:0044707~single-multicellular organism process	60	0.000176186	ENSG00000158769, ENSG00000108947, ENSG00000178573, ENSG00000112245, ENSG00000136574, ENSG00000160808, ENSG00000112561, ENSG00000175745, ENSG00000140682, ENSG00000143434, ENSG00000113296, ENSG00000168334, ENSG00000203867, ENSG00000168135, ENSG00000158286, ENSG00000107130, ENSG00000164932, ENSG00000141699, ENSG00000053918, ENSG00000198771, ENSG00000114854, ENSG00000155846, ENSG00000198812, ENSG0000…	1.48711	0.360809	0.0111878	0.0108354
Heart	GroupC	GO:0086014~atrial cardiac muscle cell action potential	4	0.000188366	ENSG00000053918, ENSG00000158286, ENSG00000130529, ENSG00000183873	34.6584	0.380285	0.0113917	0.0110329
Heart	GroupC	GO:0086026~atrial cardiac muscle cell to AV node cell signaling	4	0.000188366	ENSG00000053918, ENSG00000158286, ENSG00000130529, ENSG00000183873	34.6584	0.380285	0.0113917	0.0110329
Heart	GroupC	GO:0048644~muscle organ morphogenesis	6	0.000203106	ENSG00000173706, ENSG00000183072, ENSG00000173991, ENSG00000157240, ENSG00000114854, ENSG00000160808	11.0474	0.403062	0.0119974	0.0116196
Heart	GroupC	GO:0048468~cell development	28	0.00021297	ENSG00000158769, ENSG00000105699, ENSG00000108947, ENSG00000178573, ENSG00000039068, ENSG00000136574, ENSG00000175745, ENSG00000140682, ENSG00000143434, ENSG00000183072, ENSG00000188026, ENSG00000119508, ENSG00000107130, ENSG00000164932, ENSG00000141699, ENSG00000130940, ENSG00000173991, ENSG00000177990, ENSG00000198812, ENSG00000114554, ENSG00000154358, ENSG00000173706, ENSG00000166145, ENSG0000…	2.09571	0.417836	0.0122942	0.011907
Heart	GroupC	GO:0086066~atrial cardiac muscle cell to AV node cell communication	4	0.000224933	ENSG00000053918, ENSG00000158286, ENSG00000130529, ENSG00000183873	32.7329	0.435263	0.0126962	0.0122963
Heart	GroupC	GO:0098900~regulation of action potential	5	0.000255142	ENSG00000158286, ENSG00000130529, ENSG00000183873, ENSG00000114279, ENSG00000138622	16.0107	0.476985	0.0139335	0.0134947
Heart	GroupC	GO:0048738~cardiac muscle tissue development	8	0.000262703	ENSG00000163110, ENSG00000173706, ENSG00000183072, ENSG00000173991, ENSG00000114854, ENSG00000136574, ENSG00000160808, ENSG00000198812	6.33541	0.486936	0.0139335	0.0134947
Heart	GroupC	GO:0001508~action potential	7	0.000267412	ENSG00000053918, ENSG00000158286, ENSG00000130529, ENSG00000055118, ENSG00000183873, ENSG00000114279, ENSG00000138622	7.81127	0.493037	0.0139335	0.0134947
Heart	GroupC	GO:0048856~anatomical structure development	56	0.000268796	ENSG00000158769, ENSG00000108947, ENSG00000178573, ENSG00000112245, ENSG00000136574, ENSG00000160808, ENSG00000112561, ENSG00000175745, ENSG00000140682, ENSG00000143434, ENSG00000113296, ENSG00000168334, ENSG00000203867, ENSG00000188026, ENSG00000158286, ENSG00000107130, ENSG00000164932, ENSG00000141699, ENSG00000053918, ENSG00000114854, ENSG00000155846, ENSG00000198812, ENSG00000154358, ENSG0000…	1.50716	0.494817	0.0139335	0.0134947
Heart	GroupC	GO:0086065~cell communication involved in cardiac conduction	5	0.000277439	ENSG00000053918, ENSG00000158286, ENSG00000130529, ENSG00000183873, ENSG00000138622	15.67	0.505789	0.014051	0.0136084
Heart	GroupC	GO:0030154~cell differentiation	42	0.000283253	ENSG00000158769, ENSG00000105699, ENSG00000108947, ENSG00000178573, ENSG00000039068, ENSG00000136574, ENSG00000178878, ENSG00000175745, ENSG00000140682, ENSG00000143434, ENSG00000112183, ENSG00000183072, ENSG00000188026, ENSG00000086015, ENSG00000119508, ENSG00000107130, ENSG00000164932, ENSG00000130529, ENSG00000108840, ENSG00000141699, ENSG00000181856, ENSG00000141510, ENSG00000130940, ENSG0000…	1.69401	0.513036	0.014051	0.0136084
Heart	GroupC	GO:0051146~striated muscle cell differentiation	9	0.000287657	ENSG00000112183, ENSG00000163110, ENSG00000183072, ENSG00000173991, ENSG00000136574, ENSG00000108840, ENSG00000198812, ENSG00000122367, ENSG00000154358	5.30274	0.518455	0.014051	0.0136084
Heart	GroupC	GO:0055002~striated muscle cell development	7	0.000301853	ENSG00000163110, ENSG00000183072, ENSG00000173991, ENSG00000136574, ENSG00000198812, ENSG00000122367, ENSG00000154358	7.63769	0.535513	0.0144661	0.0140105
Heart	GroupC	GO:0060307~regulation of ventricular cardiac muscle cell membrane repolarization	4	0.000311178	ENSG00000053918, ENSG00000158286, ENSG00000055118, ENSG00000183873	29.4596	0.546389	0.0146369	0.0141759
Heart	GroupC	GO:0071495~cellular response to endogenous stimulus	20	0.000334904	ENSG00000158769, ENSG00000053918, ENSG00000197256, ENSG00000039068, ENSG00000173153, ENSG00000136574, ENSG00000155846, ENSG00000114279, ENSG00000138622, ENSG00000175745, ENSG00000140682, ENSG00000166145, ENSG00000183072, ENSG00000188730, ENSG00000157240, ENSG00000119508, ENSG00000063660, ENSG00000095637, ENSG00000108840, ENSG00000181856	2.48605	0.572927	0.0153148	0.0148324
Heart	GroupC	GO:0044763~single-organism cellular process	99	0.000337648	ENSG00000177000, ENSG00000178573, ENSG00000197256, ENSG00000160808, ENSG00000073670, ENSG00000175745, ENSG00000188026, ENSG00000166592, ENSG00000168135, ENSG00000158286, ENSG00000107130, ENSG00000167969, ENSG00000141699, ENSG00000181856, ENSG00000198053, ENSG00000070214, ENSG00000198336, ENSG00000114854, ENSG00000154518, ENSG00000155846, ENSG00000154358, ENSG00000116871, ENSG00000088888, ENSG0000…	1.18983	0.575894	0.0153148	0.0148324
Heart	GroupC	GO:0007275~multicellular organism development	51	0.000404472	ENSG00000108947, ENSG00000178573, ENSG00000112245, ENSG00000136574, ENSG00000160808, ENSG00000112561, ENSG00000175745, ENSG00000140682, ENSG00000143434, ENSG00000113296, ENSG00000168334, ENSG00000203867, ENSG00000158286, ENSG00000107130, ENSG00000164932, ENSG00000141699, ENSG00000053918, ENSG00000114854, ENSG00000155846, ENSG00000198812, ENSG00000154358, ENSG00000188730, ENSG00000141161, ENSG0000…	1.54033	0.642123	0.0180238	0.0174561
Heart	GroupC	GO:0015672~monovalent inorganic cation transport	12	0.000434555	ENSG00000183072, ENSG00000053918, ENSG00000168135, ENSG00000158286, ENSG00000154518, ENSG00000130529, ENSG00000055118, ENSG00000183873, ENSG00000179091, ENSG00000114279, ENSG00000165238, ENSG00000138622	3.63699	0.668461	0.0190305	0.0184311
Heart	GroupC	GO:0086005~ventricular cardiac muscle cell action potential	4	0.000476362	ENSG00000053918, ENSG00000158286, ENSG00000055118, ENSG00000183873	25.6171	0.701877	0.0205078	0.0198619
Heart	GroupC	GO:0035637~multicellular organismal signaling	7	0.000493272	ENSG00000053918, ENSG00000168135, ENSG00000158286, ENSG00000130529, ENSG00000055118, ENSG00000183873, ENSG00000138622	6.96681	0.714416	0.0208818	0.0202241
Heart	GroupC	GO:0048513~animal organ development	37	0.000502614	ENSG00000076604, ENSG00000105699, ENSG00000178573, ENSG00000039068, ENSG00000136574, ENSG00000160808, ENSG00000112561, ENSG00000140682, ENSG00000143434, ENSG00000198959, ENSG00000183072, ENSG00000168334, ENSG00000203867, ENSG00000119508, ENSG00000158286, ENSG00000164932, ENSG00000130529, ENSG00000183873, ENSG00000108840, ENSG00000053918, ENSG00000173991, ENSG00000173153, ENSG00000114854, ENSG0000…	1.74178	0.721116	0.0209285	0.0202693
Heart	GroupC	GO:0055001~muscle cell development	7	0.00052961	ENSG00000163110, ENSG00000183072, ENSG00000173991, ENSG00000136574, ENSG00000198812, ENSG00000122367, ENSG00000154358	6.87392	0.739608	0.0216969	0.0210136
Heart	GroupC	GO:0099623~regulation of cardiac muscle cell membrane repolarization	4	0.000541754	ENSG00000053918, ENSG00000158286, ENSG00000055118, ENSG00000183873	24.5497	0.747521	0.0218421	0.0211542
Heart	GroupC	GO:0009719~response to endogenous stimulus	23	0.000577069	ENSG00000158769, ENSG00000053918, ENSG00000107317, ENSG00000177000, ENSG00000197256, ENSG00000039068, ENSG00000173153, ENSG00000136574, ENSG00000155846, ENSG00000114279, ENSG00000138622, ENSG00000175745, ENSG00000140682, ENSG00000166145, ENSG00000183072, ENSG00000188730, ENSG00000157240, ENSG00000119508, ENSG00000063660, ENSG00000095637, ENSG00000108840, ENSG00000179091, ENSG00000181856	2.18854	0.769194	0.0229024	0.0221811
Heart	GroupC	GO:0048731~system development	46	0.000592611	ENSG00000076604, ENSG00000105699, ENSG00000108947, ENSG00000178573, ENSG00000039068, ENSG00000136574, ENSG00000160808, ENSG00000112561, ENSG00000178878, ENSG00000175745, ENSG00000140682, ENSG00000143434, ENSG00000198959, ENSG00000113296, ENSG00000183072, ENSG00000168334, ENSG00000061676, ENSG00000203867, ENSG00000119508, ENSG00000158286, ENSG00000107130, ENSG00000164932, ENSG00000130529, ENSG0000…	1.57905	0.778133	0.0231574	0.0224281
Heart	GroupC	GO:0055013~cardiac muscle cell development	5	0.000623492	ENSG00000163110, ENSG00000183072, ENSG00000173991, ENSG00000136574, ENSG00000198812	12.6981	0.794881	0.0238684	0.0231167
Heart	GroupC	GO:0003205~cardiac chamber development	7	0.000629601	ENSG00000173706, ENSG00000183072, ENSG00000157240, ENSG00000114854, ENSG00000136574, ENSG00000160808, ENSG00000183873	6.65218	0.798041	0.0238684	0.0231167
Heart	GroupC	GO:0055006~cardiac cell development	5	0.000755125	ENSG00000163110, ENSG00000183072, ENSG00000173991, ENSG00000136574, ENSG00000198812	12.0736	0.853209	0.027923	0.0270435
Heart	GroupC	GO:0042692~muscle cell differentiation	10	0.000758538	ENSG00000112183, ENSG00000163110, ENSG00000183072, ENSG00000173991, ENSG00000163833, ENSG00000136574, ENSG00000108840, ENSG00000198812, ENSG00000122367, ENSG00000154358	4.06901	0.854476	0.027923	0.0270435
Heart	GroupC	GO:0055008~cardiac muscle tissue morphogenesis	5	0.000803052	ENSG00000173706, ENSG00000183072, ENSG00000173991, ENSG00000114854, ENSG00000160808	11.8789	0.870046	0.0291393	0.0282216
Heart	GroupC	GO:0003007~heart morphogenesis	8	0.000932524	ENSG00000173706, ENSG00000183072, ENSG00000173991, ENSG00000157240, ENSG00000158286, ENSG00000114854, ENSG00000136574, ENSG00000160808	5.12342	0.906493	0.0333607	0.03231
Heart	GroupC	GO:0048869~cellular developmental process	43	0.000953291	ENSG00000158769, ENSG00000105699, ENSG00000108947, ENSG00000178573, ENSG00000039068, ENSG00000136574, ENSG00000178878, ENSG00000175745, ENSG00000140682, ENSG00000143434, ENSG00000112183, ENSG00000183072, ENSG00000188026, ENSG00000086015, ENSG00000119508, ENSG00000107130, ENSG00000164932, ENSG00000130529, ENSG00000108840, ENSG00000141699, ENSG00000181856, ENSG00000141510, ENSG00000130940, ENSG0000…	1.58663	0.911302	0.03363	0.0325708
Heart	GroupC	GO:2000026~regulation of multicellular organismal development	24	0.000994366	ENSG00000130940, ENSG00000178573, ENSG00000173153, ENSG00000136574, ENSG00000155846, ENSG00000114554, ENSG00000178878, ENSG00000175745, ENSG00000140682, ENSG00000143434, ENSG00000166145, ENSG00000163110, ENSG00000113296, ENSG00000183072, ENSG00000188730, ENSG00000157240, ENSG00000158286, ENSG00000107130, ENSG00000063660, ENSG00000164932, ENSG00000130529, ENSG00000221866, ENSG00000141699, ENSG0000…	2.05413	0.920097	0.0345985	0.0335088
Heart	GroupC	GO:0032501~multicellular organismal process	65	0.00104266	ENSG00000158769, ENSG00000108947, ENSG00000177000, ENSG00000178573, ENSG00000077157, ENSG00000112245, ENSG00000136574, ENSG00000160808, ENSG00000112561, ENSG00000175745, ENSG00000140682, ENSG00000143434, ENSG00000113296, ENSG00000168334, ENSG00000203867, ENSG00000168135, ENSG00000158286, ENSG00000107130, ENSG00000164932, ENSG00000141699, ENSG00000053918, ENSG00000198771, ENSG00000198336, ENSG0000…	1.36251	0.929331	0.0357388	0.0346132
Heart	GroupC	GO:0060306~regulation of membrane repolarization	4	0.00105528	ENSG00000053918, ENSG00000158286, ENSG00000055118, ENSG00000183873	19.6398	0.931562	0.0357388	0.0346132
Heart	GroupC	GO:0003206~cardiac chamber morphogenesis	6	0.0012077	ENSG00000173706, ENSG00000183072, ENSG00000157240, ENSG00000114854, ENSG00000136574, ENSG00000160808	7.48974	0.953551	0.0403625	0.0390912
Heart	GroupC	GO:0045214~sarcomere organization	4	0.00127667	ENSG00000183072, ENSG00000173991, ENSG00000122367, ENSG00000154358	18.4123	0.961024	0.0421135	0.0407871
Heart	GroupC	GO:0045595~regulation of cell differentiation	22	0.00137237	ENSG00000130940, ENSG00000178573, ENSG00000173153, ENSG00000136574, ENSG00000155846, ENSG00000114554, ENSG00000178878, ENSG00000175745, ENSG00000140682, ENSG00000143434, ENSG00000112183, ENSG00000166145, ENSG00000163110, ENSG00000183072, ENSG00000188730, ENSG00000107130, ENSG00000063660, ENSG00000164932, ENSG00000130529, ENSG00000221866, ENSG00000141699, ENSG00000108840	2.09881	0.969444	0.0446899	0.0432823
Heart	GroupC	GO:0003208~cardiac ventricle morphogenesis	5	0.00140667	ENSG00000173706, ENSG00000183072, ENSG00000114854, ENSG00000136574, ENSG00000160808	10.229	0.971997	0.045227	0.0438025
Heart	GroupC	GO:0099622~cardiac muscle cell membrane repolarization	4	0.00152527	ENSG00000053918, ENSG00000158286, ENSG00000055118, ENSG00000183873	17.3292	0.97929	0.0484273	0.046902
Heart	GroupC	GO:0045823~positive regulation of heart contraction	4	0.00166014	ENSG00000183072, ENSG00000053918, ENSG00000158286, ENSG00000130529	16.8341	0.985305	0.0514238	0.0498042
Heart	GroupC	GO:0010765~positive regulation of sodium ion transport	4	0.00166014	ENSG00000183072, ENSG00000183873, ENSG00000114279, ENSG00000165238	16.8341	0.985305	0.0514238	0.0498042
Heart	GroupC	GO:0044699~single-organism process	103	0.00194641	ENSG00000177000, ENSG00000178573, ENSG00000197256, ENSG00000160808, ENSG00000073670, ENSG00000112561, ENSG00000175745, ENSG00000203867, ENSG00000188026, ENSG00000166592, ENSG00000168135, ENSG00000158286, ENSG00000107130, ENSG00000167969, ENSG00000141699, ENSG00000181856, ENSG00000198053, ENSG00000070214, ENSG00000198336, ENSG00000114854, ENSG00000154518, ENSG00000155846, ENSG00000154358, ENSG0000…	1.13416	0.992907	0.0583219	0.056485
Heart	GroupC	GO:0045760~positive regulation of action potential	3	0.00194989	ENSG00000158286, ENSG00000130529, ENSG00000183873	44.1895	0.99297	0.0583219	0.056485
Heart	GroupC	GO:0086009~membrane repolarization	4	0.00195172	ENSG00000053918, ENSG00000158286, ENSG00000055118, ENSG00000183873	15.9241	0.993003	0.0583219	0.056485
Heart	GroupC	GO:0030049~muscle filament sliding	4	0.0021087	ENSG00000173991, ENSG00000198336, ENSG00000114854, ENSG00000160808	15.5051	0.995307	0.0615643	0.0596253
Heart	GroupC	GO:0033275~actin-myosin filament sliding	4	0.0021087	ENSG00000173991, ENSG00000198336, ENSG00000114854, ENSG00000160808	15.5051	0.995307	0.0615643	0.0596253
Heart	GroupC	GO:0014706~striated muscle tissue development	9	0.00252305	ENSG00000163110, ENSG00000173706, ENSG00000183072, ENSG00000173991, ENSG00000114854, ENSG00000063660, ENSG00000136574, ENSG00000160808, ENSG00000198812	3.78767	0.998366	0.0728243	0.0705306
Heart	GroupC	GO:0003254~regulation of membrane depolarization	4	0.00262594	ENSG00000130529, ENSG00000183873, ENSG00000114279, ENSG00000138622	14.3706	0.998743	0.0749424	0.072582
Heart	GroupC	GO:0098655~cation transmembrane transport	13	0.00273254	ENSG00000133657, ENSG00000053918, ENSG00000154518, ENSG00000114279, ENSG00000138622, ENSG00000168135, ENSG00000158286, ENSG00000107130, ENSG00000130529, ENSG00000055118, ENSG00000183873, ENSG00000179091, ENSG00000165238	2.72387	0.999042	0.0771185	0.0746895
Heart	GroupC	GO:0060452~positive regulation of cardiac muscle contraction	3	0.0028348	ENSG00000053918, ENSG00000158286, ENSG00000130529	36.8246	0.999261	0.0774235	0.074985
Heart	GroupC	GO:0098915~membrane repolarization during ventricular cardiac muscle cell action potential	3	0.0028348	ENSG00000053918, ENSG00000158286, ENSG00000055118	36.8246	0.999261	0.0774235	0.074985
Heart	GroupC	GO:0099625~ventricular cardiac muscle cell membrane repolarization	3	0.0028348	ENSG00000053918, ENSG00000158286, ENSG00000055118	36.8246	0.999261	0.0774235	0.074985
Heart	GroupC	GO:0009888~tissue development	23	0.00295251	ENSG00000158769, ENSG00000173991, ENSG00000178573, ENSG00000173153, ENSG00000114854, ENSG00000136574, ENSG00000160808, ENSG00000198812, ENSG00000114554, ENSG00000178878, ENSG00000140682, ENSG00000143434, ENSG00000166145, ENSG00000198959, ENSG00000163110, ENSG00000173706, ENSG00000183072, ENSG00000188026, ENSG00000157240, ENSG00000119508, ENSG00000063660, ENSG00000164932, ENSG00000130529	1.92931	0.999453	0.0797806	0.0772678
Heart	GroupC	GO:0048729~tissue morphogenesis	12	0.00314001	ENSG00000166145, ENSG00000173706, ENSG00000198959, ENSG00000183072, ENSG00000173991, ENSG00000157240, ENSG00000119508, ENSG00000114854, ENSG00000164932, ENSG00000136574, ENSG00000160808, ENSG00000114554	2.84177	0.999661	0.0839539	0.0813097
Heart	GroupC	GO:0043270~positive regulation of ion transport	7	0.00318347	ENSG00000183072, ENSG00000053918, ENSG00000158286, ENSG00000055118, ENSG00000183873, ENSG00000114279, ENSG00000165238	4.84079	0.999696	0.0842293	0.0815764
Heart	GroupC	GO:0007517~muscle organ development	9	0.00331478	ENSG00000173706, ENSG00000183072, ENSG00000173991, ENSG00000157240, ENSG00000141161, ENSG00000114854, ENSG00000063660, ENSG00000170681, ENSG00000160808	3.62209	0.999783	0.0867994	0.0840656
Heart	GroupC	GO:0060537~muscle tissue development	9	0.00337002	ENSG00000163110, ENSG00000173706, ENSG00000183072, ENSG00000173991, ENSG00000114854, ENSG00000063660, ENSG00000136574, ENSG00000160808, ENSG00000198812	3.61222	0.999811	0.0873455	0.0845944
Heart	GroupC	GO:0002027~regulation of heart rate	5	0.00344756	ENSG00000053918, ENSG00000130529, ENSG00000055118, ENSG00000183873, ENSG00000138622	8.00534	0.999845	0.0884527	0.0856668
Heart	GroupC	GO:0051050~positive regulation of transport	15	0.00348376	ENSG00000053918, ENSG00000039068, ENSG00000196535, ENSG00000114279, ENSG00000183072, ENSG00000088888, ENSG00000158286, ENSG00000119508, ENSG00000107130, ENSG00000130529, ENSG00000055118, ENSG00000095637, ENSG00000183873, ENSG00000141510, ENSG00000165238	2.4016	0.999859	0.0884874	0.0857004
Heart	GroupC	GO:0050793~regulation of developmental process	26	0.00354481	ENSG00000178573, ENSG00000136574, ENSG00000178878, ENSG00000175745, ENSG00000140682, ENSG00000143434, ENSG00000112183, ENSG00000113296, ENSG00000183072, ENSG00000158286, ENSG00000107130, ENSG00000164932, ENSG00000130529, ENSG00000108840, ENSG00000141699, ENSG00000130940, ENSG00000173153, ENSG00000155846, ENSG00000074590, ENSG00000114554, ENSG00000166145, ENSG00000163110, ENSG00000188730, ENSG0000…	1.79885	0.999879	0.0891466	0.0863389
Heart	GroupC	GO:0098662~inorganic cation transmembrane transport	12	0.0036725	ENSG00000053918, ENSG00000168135, ENSG00000158286, ENSG00000107130, ENSG00000154518, ENSG00000130529, ENSG00000055118, ENSG00000183873, ENSG00000179091, ENSG00000114279, ENSG00000165238, ENSG00000138622	2.78359	0.999913	0.0914526	0.0885722
Heart	GroupC	GO:0055010~ventricular cardiac muscle tissue morphogenesis	4	0.00387935	ENSG00000173706, ENSG00000183072, ENSG00000114854, ENSG00000160808	12.536	0.999948	0.0947456	0.0917615
Heart	GroupC	GO:0086010~membrane depolarization during action potential	4	0.00387935	ENSG00000130529, ENSG00000055118, ENSG00000183873, ENSG00000138622	12.536	0.999948	0.0947456	0.0917615
Heart	GroupC	GO:0007010~cytoskeleton organization	17	0.00411612	ENSG00000158769, ENSG00000088280, ENSG00000173991, ENSG00000155846, ENSG00000112137, ENSG00000196535, ENSG00000134278, ENSG00000154358, ENSG00000116871, ENSG00000183072, ENSG00000168334, ENSG00000061676, ENSG00000086015, ENSG00000095637, ENSG00000071205, ENSG00000122367, ENSG00000166317	2.18887	0.999972	0.099571	0.0964349
Heart	GroupC	GO:0055007~cardiac muscle cell differentiation	5	0.00416698	ENSG00000163110, ENSG00000183072, ENSG00000173991, ENSG00000136574, ENSG00000198812	7.59269	0.999975	0.0998504	0.0967055
Heart	GroupC	GO:0070887~cellular response to chemical stimulus	30	0.00446234	ENSG00000158769, ENSG00000197256, ENSG00000039068, ENSG00000136574, ENSG00000175745, ENSG00000140682, ENSG00000198959, ENSG00000113296, ENSG00000183072, ENSG00000119508, ENSG00000130529, ENSG00000055118, ENSG00000095637, ENSG00000183873, ENSG00000108840, ENSG00000181856, ENSG00000141510, ENSG00000053918, ENSG00000173153, ENSG00000155846, ENSG00000114279, ENSG00000174348, ENSG00000138622, ENSG0000…	1.66879	0.999988	0.105928	0.102592
Heart	GroupC	GO:0045989~positive regulation of striated muscle contraction	3	0.00506444	ENSG00000053918, ENSG00000158286, ENSG00000130529	27.6184	0.999997	0.119108	0.115357
Heart	GroupC	GO:0048522~positive regulation of cellular process	46	0.00515753	ENSG00000076604, ENSG00000108947, ENSG00000103150, ENSG00000178573, ENSG00000039068, ENSG00000112245, ENSG00000136574, ENSG00000112561, ENSG00000134278, ENSG00000175745, ENSG00000140682, ENSG00000143434, ENSG00000198959, ENSG00000113296, ENSG00000183072, ENSG00000061676, ENSG00000203867, ENSG00000119508, ENSG00000158286, ENSG00000107130, ENSG00000164932, ENSG00000130529, ENSG00000055118, ENSG0000…	1.42827	0.999998	0.119158	0.115405
Heart	GroupC	GO:0003229~ventricular cardiac muscle tissue development	4	0.00516037	ENSG00000173706, ENSG00000183072, ENSG00000114854, ENSG00000160808	11.3306	0.999998	0.119158	0.115405
Heart	GroupC	GO:0030239~myofibril assembly	4	0.0054435	ENSG00000183072, ENSG00000173991, ENSG00000122367, ENSG00000154358	11.1168	0.999999	0.124563	0.12064
Heart	GroupC	GO:0006812~cation transport	15	0.00579768	ENSG00000133657, ENSG00000070214, ENSG00000053918, ENSG00000154518, ENSG00000114279, ENSG00000138622, ENSG00000183072, ENSG00000168135, ENSG00000158286, ENSG00000107130, ENSG00000130529, ENSG00000055118, ENSG00000183873, ENSG00000179091, ENSG00000165238	2.26613	1	0.131287	0.127152
Heart	GroupC	GO:0010033~response to organic substance	31	0.0058407	ENSG00000158769, ENSG00000107317, ENSG00000177000, ENSG00000197256, ENSG00000039068, ENSG00000136574, ENSG00000170276, ENSG00000175745, ENSG00000140682, ENSG00000198959, ENSG00000113296, ENSG00000183072, ENSG00000119508, ENSG00000130529, ENSG00000095637, ENSG00000108840, ENSG00000181856, ENSG00000053918, ENSG00000173153, ENSG00000155846, ENSG00000117305, ENSG00000114279, ENSG00000174348, ENSG0000…	1.61809	1	0.131287	0.127152
Heart	GroupC	GO:0051254~positive regulation of RNA metabolic process	19	0.00629017	ENSG00000178573, ENSG00000039068, ENSG00000146592, ENSG00000173153, ENSG00000170681, ENSG00000136574, ENSG00000155846, ENSG00000112561, ENSG00000175745, ENSG00000140682, ENSG00000183072, ENSG00000144712, ENSG00000203867, ENSG00000088888, ENSG00000157240, ENSG00000119508, ENSG00000108840, ENSG00000078804, ENSG00000141510	1.97786	1	0.140149	0.135735
Heart	GroupC	GO:0032879~regulation of localization	28	0.00650781	ENSG00000039068, ENSG00000112245, ENSG00000136574, ENSG00000143434, ENSG00000113296, ENSG00000183072, ENSG00000168135, ENSG00000119508, ENSG00000158286, ENSG00000107130, ENSG00000130529, ENSG00000055118, ENSG00000095637, ENSG00000183873, ENSG00000108840, ENSG00000141510, ENSG00000053918, ENSG00000114854, ENSG00000196535, ENSG00000114279, ENSG00000114554, ENSG00000174348, ENSG00000138622, ENSG0000…	1.66775	1	0.143738	0.13921
Heart	GroupC	GO:0048839~inner ear development	6	0.00707313	ENSG00000053918, ENSG00000173991, ENSG00000178573, ENSG00000119508, ENSG00000164932, ENSG00000162889	4.96511	1	0.154626	0.149756
Heart	GroupC	GO:0086012~membrane depolarization during cardiac muscle cell action potential	3	0.00712255	ENSG00000130529, ENSG00000183873, ENSG00000138622	23.2576	1	0.154626	0.149756
Heart	GroupC	GO:0043401~steroid hormone mediated signaling pathway	6	0.00740593	ENSG00000140682, ENSG00000173153, ENSG00000197256, ENSG00000119508, ENSG00000155846, ENSG00000175745	4.90994	1	0.159416	0.154395
Heart	GroupC	GO:0007015~actin filament organization	8	0.00752346	ENSG00000088280, ENSG00000061676, ENSG00000173991, ENSG00000155846, ENSG00000095637, ENSG00000112137, ENSG00000134278, ENSG00000166317	3.51757	1	0.160585	0.155527
Heart	GroupC	GO:0003300~cardiac muscle hypertrophy	4	0.00768631	ENSG00000163110, ENSG00000173991, ENSG00000119508, ENSG00000136574	9.81988	1	0.161935	0.156834
Heart	GroupC	GO:0051270~regulation of cellular component movement	13	0.00771421	ENSG00000114854, ENSG00000112245, ENSG00000136574, ENSG00000114554, ENSG00000138622, ENSG00000174348, ENSG00000143434, ENSG00000113296, ENSG00000158286, ENSG00000130529, ENSG00000221866, ENSG00000183873, ENSG00000108840	2.38763	1	0.161935	0.156834
Heart	GroupC	GO:0014897~striated muscle hypertrophy	4	0.00841305	ENSG00000163110, ENSG00000173991, ENSG00000119508, ENSG00000136574	9.50311	1	0.171726	0.166318
Heart	GroupC	GO:0030522~intracellular receptor signaling pathway	7	0.00843518	ENSG00000140682, ENSG00000088888, ENSG00000173153, ENSG00000197256, ENSG00000119508, ENSG00000155846, ENSG00000175745	3.95053	1	0.171726	0.166318
Heart	GroupC	GO:0071407~cellular response to organic cyclic compound	10	0.00847498	ENSG00000140682, ENSG00000053918, ENSG00000088888, ENSG00000173153, ENSG00000197256, ENSG00000039068, ENSG00000119508, ENSG00000155846, ENSG00000175745, ENSG00000138622	2.83266	1	0.171726	0.166318
Heart	GroupC	GO:0086011~membrane repolarization during action potential	3	0.00867075	ENSG00000053918, ENSG00000158286, ENSG00000055118	21.0426	1	0.171726	0.166318
Heart	GroupC	GO:0086013~membrane repolarization during cardiac muscle cell action potential	3	0.00867075	ENSG00000053918, ENSG00000158286, ENSG00000055118	21.0426	1	0.171726	0.166318
Heart	GroupC	GO:1903508~positive regulation of nucleic acid-templated transcription	18	0.00867479	ENSG00000178573, ENSG00000039068, ENSG00000146592, ENSG00000173153, ENSG00000170681, ENSG00000136574, ENSG00000155846, ENSG00000112561, ENSG00000175745, ENSG00000140682, ENSG00000183072, ENSG00000144712, ENSG00000088888, ENSG00000157240, ENSG00000119508, ENSG00000108840, ENSG00000078804, ENSG00000141510	1.96543	1	0.171726	0.166318
Heart	GroupC	GO:0045893~positive regulation of transcription, DNA-templated	18	0.00867479	ENSG00000178573, ENSG00000039068, ENSG00000146592, ENSG00000173153, ENSG00000170681, ENSG00000136574, ENSG00000155846, ENSG00000112561, ENSG00000175745, ENSG00000140682, ENSG00000183072, ENSG00000144712, ENSG00000088888, ENSG00000157240, ENSG00000119508, ENSG00000108840, ENSG00000078804, ENSG00000141510	1.96543	1	0.171726	0.166318
Heart	GroupC	GO:0048518~positive regulation of biological process	49	0.00872154	ENSG00000108947, ENSG00000178573, ENSG00000112245, ENSG00000136574, ENSG00000112561, ENSG00000134278, ENSG00000175745, ENSG00000140682, ENSG00000143434, ENSG00000113296, ENSG00000203867, ENSG00000158286, ENSG00000107130, ENSG00000164932, ENSG00000141699, ENSG00000166317, ENSG00000053918, ENSG00000155846, ENSG00000154358, ENSG00000144712, ENSG00000188730, ENSG00000088888, ENSG00000162889, ENSG0000…	1.36568	1	0.171726	0.166318
Heart	GroupC	GO:0003281~ventricular septum development	4	0.00879104	ENSG00000173706, ENSG00000183072, ENSG00000157240, ENSG00000136574	9.35227	1	0.171763	0.166354
Heart	GroupC	GO:0048699~generation of neurons	18	0.00917503	ENSG00000130940, ENSG00000108947, ENSG00000039068, ENSG00000114554, ENSG00000175745, ENSG00000143434, ENSG00000166145, ENSG00000163110, ENSG00000183072, ENSG00000188730, ENSG00000157240, ENSG00000119508, ENSG00000107130, ENSG00000063660, ENSG00000164932, ENSG00000221866, ENSG00000141699, ENSG00000108840	1.95385	1	0.177898	0.172295
Heart	GroupC	GO:0035051~cardiocyte differentiation	5	0.00929721	ENSG00000163110, ENSG00000183072, ENSG00000173991, ENSG00000136574, ENSG00000198812	6.03681	1	0.178901	0.173266
Heart	GroupC	GO:0098660~inorganic ion transmembrane transport	12	0.00964869	ENSG00000053918, ENSG00000168135, ENSG00000158286, ENSG00000107130, ENSG00000154518, ENSG00000130529, ENSG00000055118, ENSG00000183873, ENSG00000179091, ENSG00000114279, ENSG00000165238, ENSG00000138622	2.43804	1	0.184268	0.178464
Heart	GroupC	GO:0071310~cellular response to organic substance	25	0.00989719	ENSG00000158769, ENSG00000197256, ENSG00000039068, ENSG00000136574, ENSG00000175745, ENSG00000140682, ENSG00000198959, ENSG00000183072, ENSG00000119508, ENSG00000130529, ENSG00000095637, ENSG00000108840, ENSG00000181856, ENSG00000053918, ENSG00000173153, ENSG00000155846, ENSG00000114279, ENSG00000174348, ENSG00000138622, ENSG00000166145, ENSG00000188730, ENSG00000088888, ENSG00000157240, ENSG0000…	1.68456	1	0.185486	0.179644
Heart	GroupC	GO:1902680~positive regulation of RNA biosynthetic process	18	0.00996878	ENSG00000178573, ENSG00000039068, ENSG00000146592, ENSG00000173153, ENSG00000170681, ENSG00000136574, ENSG00000155846, ENSG00000112561, ENSG00000175745, ENSG00000140682, ENSG00000183072, ENSG00000144712, ENSG00000088888, ENSG00000157240, ENSG00000119508, ENSG00000108840, ENSG00000078804, ENSG00000141510	1.93672	1	0.185486	0.179644
Heart	GroupC	GO:0014896~muscle hypertrophy	4	0.0099842	ENSG00000163110, ENSG00000173991, ENSG00000119508, ENSG00000136574	8.92717	1	0.185486	0.179644
Heart	GroupC	GO:0010557~positive regulation of macromolecule biosynthetic process	20	0.0100046	ENSG00000178573, ENSG00000039068, ENSG00000146592, ENSG00000173153, ENSG00000170681, ENSG00000136574, ENSG00000155846, ENSG00000112561, ENSG00000175745, ENSG00000140682, ENSG00000183072, ENSG00000144712, ENSG00000088888, ENSG00000157240, ENSG00000119508, ENSG00000162889, ENSG00000095637, ENSG00000108840, ENSG00000078804, ENSG00000141510	1.84469	1	0.185486	0.179644
Heart	GroupC	GO:0055017~cardiac muscle tissue growth	4	0.0104018	ENSG00000163110, ENSG00000173706, ENSG00000183072, ENSG00000136574	8.79393	1	0.191453	0.185423
Heart	GroupC	GO:0051017~actin filament bundle assembly	5	0.0106642	ENSG00000088280, ENSG00000095637, ENSG00000112137, ENSG00000134278, ENSG00000166317	5.79914	1	0.194872	0.188734
Heart	GroupC	GO:0006814~sodium ion transport	6	0.0111294	ENSG00000183072, ENSG00000130529, ENSG00000183873, ENSG00000114279, ENSG00000165238, ENSG00000138622	4.44115	1	0.201918	0.195559
Heart	GroupC	GO:0061572~actin filament bundle organization	5	0.0118468	ENSG00000088280, ENSG00000095637, ENSG00000112137, ENSG00000134278, ENSG00000166317	5.62207	1	0.213411	0.20669
Heart	GroupC	GO:0043583~ear development	6	0.0122888	ENSG00000053918, ENSG00000173991, ENSG00000178573, ENSG00000119508, ENSG00000164932, ENSG00000162889	4.3323	1	0.219814	0.212891
Heart	GroupC	GO:0035725~sodium ion transmembrane transport	5	0.0124685	ENSG00000130529, ENSG00000183873, ENSG00000114279, ENSG00000165238, ENSG00000138622	5.53753	1	0.221468	0.214493
Heart	GroupC	GO:0060419~heart growth	4	0.0126409	ENSG00000163110, ENSG00000173706, ENSG00000183072, ENSG00000136574	8.18324	1	0.222971	0.215949
Heart	GroupC	GO:0045664~regulation of neuron differentiation	10	0.0133031	ENSG00000143434, ENSG00000163110, ENSG00000130940, ENSG00000183072, ENSG00000188730, ENSG00000107130, ENSG00000221866, ENSG00000141699, ENSG00000114554, ENSG00000175745	2.63033	1	0.233034	0.225694
Heart	GroupC	GO:1903949~positive regulation of atrial cardiac muscle cell action potential	2	0.0134139	ENSG00000158286, ENSG00000130529	147.298	1	0.233365	0.226015
Heart	GroupC	GO:1901381~positive regulation of potassium ion transmembrane transport	3	0.0141176	ENSG00000053918, ENSG00000158286, ENSG00000055118	16.3665	1	0.241063	0.233471
Heart	GroupC	GO:0098901~regulation of cardiac muscle cell action potential	3	0.0141176	ENSG00000158286, ENSG00000130529, ENSG00000138622	16.3665	1	0.241063	0.233471
Heart	GroupC	GO:0003008~system process	23	0.0144123	ENSG00000158769, ENSG00000053918, ENSG00000173991, ENSG00000198771, ENSG00000177000, ENSG00000198336, ENSG00000114854, ENSG00000077157, ENSG00000136574, ENSG00000160808, ENSG00000114279, ENSG00000138622, ENSG00000163110, ENSG00000173706, ENSG00000183072, ENSG00000121743, ENSG00000168135, ENSG00000158286, ENSG00000119508, ENSG00000130529, ENSG00000055118, ENSG00000095637, ENSG00000183873	1.68215	1	0.241063	0.233471
Heart	GroupC	GO:0009653~anatomical structure morphogenesis	28	0.0144621	ENSG00000108947, ENSG00000109814, ENSG00000136574, ENSG00000160808, ENSG00000178878, ENSG00000140682, ENSG00000143434, ENSG00000198959, ENSG00000113296, ENSG00000183072, ENSG00000188026, ENSG00000119508, ENSG00000158286, ENSG00000164932, ENSG00000183873, ENSG00000108840, ENSG00000173991, ENSG00000114854, ENSG00000155846, ENSG00000114554, ENSG00000154358, ENSG00000173706, ENSG00000166145, ENSG0000…	1.5676	1	0.241063	0.233471
Heart	GroupC	GO:0051960~regulation of nervous system development	12	0.0144951	ENSG00000143434, ENSG00000163110, ENSG00000166145, ENSG00000130940, ENSG00000183072, ENSG00000188730, ENSG00000157240, ENSG00000107130, ENSG00000221866, ENSG00000141699, ENSG00000114554, ENSG00000175745	2.29854	1	0.241063	0.233471
Heart	GroupC	GO:1904062~regulation of cation transmembrane transport	6	0.0145778	ENSG00000053918, ENSG00000158286, ENSG00000055118, ENSG00000183873, ENSG00000114279, ENSG00000165238	4.14925	1	0.241063	0.233471
Heart	GroupC	GO:0009127~purine nucleoside monophosphate biosynthetic process	4	0.0146156	ENSG00000250479, ENSG00000154518, ENSG00000128050, ENSG00000179091	7.75254	1	0.241063	0.233471
Heart	GroupC	GO:0009168~purine ribonucleoside monophosphate biosynthetic process	4	0.0146156	ENSG00000250479, ENSG00000154518, ENSG00000128050, ENSG00000179091	7.75254	1	0.241063	0.233471
Heart	GroupC	GO:0090002~establishment of protein localization to plasma membrane	5	0.0155231	ENSG00000158769, ENSG00000188026, ENSG00000039068, ENSG00000165914, ENSG00000095637	5.18656	1	0.254379	0.246367
Heart	GroupC	GO:0009887~organ morphogenesis	14	0.015873	ENSG00000173991, ENSG00000114854, ENSG00000136574, ENSG00000155846, ENSG00000160808, ENSG00000114554, ENSG00000198959, ENSG00000173706, ENSG00000183072, ENSG00000157240, ENSG00000158286, ENSG00000119508, ENSG00000164932, ENSG00000183873	2.07881	1	0.258359	0.250221
Heart	GroupC	GO:0051179~localization	52	0.0159694	ENSG00000158769, ENSG00000112245, ENSG00000136574, ENSG00000134278, ENSG00000143434, ENSG00000113296, ENSG00000188026, ENSG00000168135, ENSG00000158286, ENSG00000107130, ENSG00000164932, ENSG00000181856, ENSG00000198053, ENSG00000070214, ENSG00000088280, ENSG00000053918, ENSG00000114854, ENSG00000154518, ENSG00000154358, ENSG00000174348, ENSG00000138760, ENSG00000088888, ENSG00000165914, ENSG0000…	1.30441	1	0.258359	0.250221
Heart	GroupC	GO:0022008~neurogenesis	18	0.0165665	ENSG00000130940, ENSG00000108947, ENSG00000039068, ENSG00000114554, ENSG00000175745, ENSG00000143434, ENSG00000166145, ENSG00000163110, ENSG00000183072, ENSG00000188730, ENSG00000157240, ENSG00000119508, ENSG00000107130, ENSG00000063660, ENSG00000164932, ENSG00000221866, ENSG00000141699, ENSG00000108840	1.83232	1	0.265665	0.257298
Heart	GroupC	GO:0050767~regulation of neurogenesis	11	0.0166654	ENSG00000143434, ENSG00000163110, ENSG00000166145, ENSG00000130940, ENSG00000183072, ENSG00000188730, ENSG00000107130, ENSG00000221866, ENSG00000141699, ENSG00000114554, ENSG00000175745	2.37578	1	0.265665	0.257298
Heart	GroupC	GO:0034765~regulation of ion transmembrane transport	8	0.0167388	ENSG00000053918, ENSG00000168135, ENSG00000158286, ENSG00000055118, ENSG00000183873, ENSG00000114279, ENSG00000165238, ENSG00000138622	3.00609	1	0.265665	0.257298
Heart	GroupC	GO:0009755~hormone-mediated signaling pathway	6	0.0168394	ENSG00000140682, ENSG00000173153, ENSG00000197256, ENSG00000119508, ENSG00000155846, ENSG00000175745	3.99905	1	0.265665	0.257298
Heart	GroupC	GO:0030182~neuron differentiation	16	0.0173638	ENSG00000108947, ENSG00000039068, ENSG00000114554, ENSG00000175745, ENSG00000143434, ENSG00000163110, ENSG00000183072, ENSG00000188730, ENSG00000157240, ENSG00000119508, ENSG00000107130, ENSG00000063660, ENSG00000164932, ENSG00000221866, ENSG00000141699, ENSG00000108840	1.92233	1	0.268458	0.260003
Heart	GroupC	GO:0071772~response to BMP	5	0.0174069	ENSG00000166145, ENSG00000183072, ENSG00000188730, ENSG00000157240, ENSG00000136574	5.01014	1	0.268458	0.260003
Heart	GroupC	GO:0071773~cellular response to BMP stimulus	5	0.0174069	ENSG00000166145, ENSG00000183072, ENSG00000188730, ENSG00000157240, ENSG00000136574	5.01014	1	0.268458	0.260003
Heart	GroupC	GO:0007411~axon guidance	6	0.0174392	ENSG00000143434, ENSG00000108947, ENSG00000119508, ENSG00000063660, ENSG00000221866, ENSG00000114554	3.96318	1	0.268458	0.260003
Heart	GroupC	GO:0010628~positive regulation of gene expression	20	0.0176666	ENSG00000178573, ENSG00000039068, ENSG00000146592, ENSG00000173153, ENSG00000170681, ENSG00000136574, ENSG00000155846, ENSG00000112561, ENSG00000175745, ENSG00000140682, ENSG00000183072, ENSG00000144712, ENSG00000203867, ENSG00000088888, ENSG00000157240, ENSG00000158286, ENSG00000119508, ENSG00000108840, ENSG00000078804, ENSG00000141510	1.74111	1	0.269885	0.261384
Heart	GroupC	GO:0097485~neuron projection guidance	6	0.0177444	ENSG00000143434, ENSG00000108947, ENSG00000119508, ENSG00000063660, ENSG00000221866, ENSG00000114554	3.94549	1	0.269885	0.261384
Heart	GroupC	GO:0042221~response to chemical	39	0.0181326	ENSG00000158769, ENSG00000108947, ENSG00000107317, ENSG00000177000, ENSG00000197256, ENSG00000039068, ENSG00000136574, ENSG00000170276, ENSG00000175745, ENSG00000140682, ENSG00000143434, ENSG00000198959, ENSG00000113296, ENSG00000183072, ENSG00000119508, ENSG00000130529, ENSG00000055118, ENSG00000095637, ENSG00000183873, ENSG00000108840, ENSG00000181856, ENSG00000141510, ENSG00000053918, ENSG0000…	1.39534	1	0.274147	0.265513
Heart	GroupC	GO:0003209~cardiac atrium morphogenesis	3	0.0183798	ENSG00000173706, ENSG00000183072, ENSG00000136574	14.2547	1	0.275955	0.267263
Heart	GroupC	GO:0002028~regulation of sodium ion transport	4	0.0184694	ENSG00000183072, ENSG00000183873, ENSG00000114279, ENSG00000165238	7.09871	1	0.275955	0.267263
Heart	GroupC	GO:0014070~response to organic cyclic compound	13	0.0187969	ENSG00000053918, ENSG00000107317, ENSG00000177000, ENSG00000197256, ENSG00000039068, ENSG00000173153, ENSG00000155846, ENSG00000138622, ENSG00000175745, ENSG00000140682, ENSG00000088888, ENSG00000119508, ENSG00000108840	2.11355	1	0.279205	0.270411
Heart	GroupC	GO:0043500~muscle adaptation	4	0.0190616	ENSG00000173991, ENSG00000119508, ENSG00000114854, ENSG00000183873	7.0142	1	0.281491	0.272625
Heart	GroupC	GO:0034762~regulation of transmembrane transport	8	0.019875	ENSG00000053918, ENSG00000168135, ENSG00000158286, ENSG00000055118, ENSG00000183873, ENSG00000114279, ENSG00000165238, ENSG00000138622	2.90243	1	0.284563	0.2756
Heart	GroupC	GO:1903781~positive regulation of cardiac conduction	2	0.0200538	ENSG00000158286, ENSG00000130529	98.1988	1	0.284563	0.2756
Heart	GroupC	GO:0086017~Purkinje myocyte action potential	2	0.0200538	ENSG00000130529, ENSG00000183873	98.1988	1	0.284563	0.2756
Heart	GroupC	GO:0003285~septum secundum development	2	0.0200538	ENSG00000183072, ENSG00000136574	98.1988	1	0.284563	0.2756
Heart	GroupC	GO:1903116~positive regulation of actin filament-based movement	2	0.0200538	ENSG00000158286, ENSG00000130529	98.1988	1	0.284563	0.2756
Heart	GroupC	GO:0086047~membrane depolarization during Purkinje myocyte cell action potential	2	0.0200538	ENSG00000130529, ENSG00000183873	98.1988	1	0.284563	0.2756
Heart	GroupC	GO:0086048~membrane depolarization during bundle of His cell action potential	2	0.0200538	ENSG00000130529, ENSG00000183873	98.1988	1	0.284563	0.2756
Heart	GroupC	GO:1903524~positive regulation of blood circulation	4	0.0209009	ENSG00000183072, ENSG00000053918, ENSG00000158286, ENSG00000130529	6.77233	1	0.294934	0.285645
Heart	GroupC	GO:0042493~response to drug	8	0.0210888	ENSG00000053918, ENSG00000157240, ENSG00000177000, ENSG00000039068, ENSG00000055118, ENSG00000136574, ENSG00000108840, ENSG00000141510	2.86712	1	0.295943	0.286622
Heart	GroupC	GO:0009156~ribonucleoside monophosphate biosynthetic process	4	0.0215349	ENSG00000250479, ENSG00000154518, ENSG00000128050, ENSG00000179091	6.69537	1	0.299631	0.290194
Heart	GroupC	GO:0031328~positive regulation of cellular biosynthetic process	20	0.0216754	ENSG00000178573, ENSG00000039068, ENSG00000146592, ENSG00000173153, ENSG00000170681, ENSG00000136574, ENSG00000155846, ENSG00000112561, ENSG00000175745, ENSG00000140682, ENSG00000183072, ENSG00000144712, ENSG00000088888, ENSG00000157240, ENSG00000119508, ENSG00000162889, ENSG00000095637, ENSG00000108840, ENSG00000078804, ENSG00000141510	1.70385	1	0.299631	0.290194
Heart	GroupC	GO:0010959~regulation of metal ion transport	7	0.0217055	ENSG00000183072, ENSG00000053918, ENSG00000158286, ENSG00000055118, ENSG00000183873, ENSG00000114279, ENSG00000165238	3.20214	1	0.299631	0.290194
Heart	GroupC	GO:0071363~cellular response to growth factor stimulus	10	0.0219172	ENSG00000140682, ENSG00000158769, ENSG00000166145, ENSG00000183072, ENSG00000188730, ENSG00000157240, ENSG00000063660, ENSG00000136574, ENSG00000162889, ENSG00000114279	2.41473	1	0.300918	0.29144
Heart	GroupC	GO:0048646~anatomical structure formation involved in morphogenesis	15	0.0223319	ENSG00000173991, ENSG00000136574, ENSG00000155846, ENSG00000178878, ENSG00000154358, ENSG00000166145, ENSG00000198959, ENSG00000113296, ENSG00000183072, ENSG00000157240, ENSG00000119508, ENSG00000063660, ENSG00000164932, ENSG00000108840, ENSG00000122367	1.91961	1	0.304962	0.295357
Heart	GroupC	GO:0003009~skeletal muscle contraction	3	0.0231128	ENSG00000198771, ENSG00000173991, ENSG00000114854	12.6256	1	0.310616	0.300833
Heart	GroupC	GO:0003230~cardiac atrium development	3	0.0231128	ENSG00000173706, ENSG00000183072, ENSG00000136574	12.6256	1	0.310616	0.300833
Heart	GroupC	GO:0043268~positive regulation of potassium ion transport	3	0.0231128	ENSG00000053918, ENSG00000158286, ENSG00000055118	12.6256	1	0.310616	0.300833
Heart	GroupC	GO:0071383~cellular response to steroid hormone stimulus	6	0.0234832	ENSG00000140682, ENSG00000173153, ENSG00000197256, ENSG00000119508, ENSG00000155846, ENSG00000175745	3.66718	1	0.312511	0.302668
Heart	GroupC	GO:0051899~membrane depolarization	4	0.0234998	ENSG00000130529, ENSG00000055118, ENSG00000183873, ENSG00000138622	6.47465	1	0.312511	0.302668
Heart	GroupC	GO:0048841~regulation of axon extension involved in axon guidance	3	0.0243663	ENSG00000143434, ENSG00000221866, ENSG00000114554	12.2749	1	0.322346	0.312194
Heart	GroupC	GO:0009891~positive regulation of biosynthetic process	20	0.0255506	ENSG00000178573, ENSG00000039068, ENSG00000146592, ENSG00000173153, ENSG00000170681, ENSG00000136574, ENSG00000155846, ENSG00000112561, ENSG00000175745, ENSG00000140682, ENSG00000183072, ENSG00000144712, ENSG00000088888, ENSG00000157240, ENSG00000119508, ENSG00000162889, ENSG00000095637, ENSG00000108840, ENSG00000078804, ENSG00000141510	1.67384	1	0.335793	0.325217
Heart	GroupC	GO:0071526~semaphorin-plexin signaling pathway	3	0.0256472	ENSG00000143434, ENSG00000221866, ENSG00000114554	11.9431	1	0.335793	0.325217
Heart	GroupC	GO:0003279~cardiac septum development	4	0.026984	ENSG00000173706, ENSG00000183072, ENSG00000157240, ENSG00000136574	6.13743	1	0.351484	0.340414
Heart	GroupC	GO:0070848~response to growth factor	10	0.0272416	ENSG00000140682, ENSG00000158769, ENSG00000166145, ENSG00000183072, ENSG00000188730, ENSG00000157240, ENSG00000063660, ENSG00000136574, ENSG00000162889, ENSG00000114279	2.32332	1	0.353029	0.34191
Heart	GroupC	GO:0009124~nucleoside monophosphate biosynthetic process	4	0.0277122	ENSG00000250479, ENSG00000154518, ENSG00000128050, ENSG00000179091	6.07415	1	0.357305	0.346051
Heart	GroupC	GO:0045935~positive regulation of nucleobase-containing compound metabolic process	19	0.0281685	ENSG00000178573, ENSG00000039068, ENSG00000146592, ENSG00000173153, ENSG00000170681, ENSG00000136574, ENSG00000155846, ENSG00000112561, ENSG00000175745, ENSG00000140682, ENSG00000183072, ENSG00000144712, ENSG00000203867, ENSG00000088888, ENSG00000157240, ENSG00000119508, ENSG00000108840, ENSG00000078804, ENSG00000141510	1.68798	1	0.359681	0.348353
Heart	GroupC	GO:0060284~regulation of cell development	12	0.0281797	ENSG00000140682, ENSG00000143434, ENSG00000163110, ENSG00000166145, ENSG00000130940, ENSG00000183072, ENSG00000188730, ENSG00000107130, ENSG00000221866, ENSG00000141699, ENSG00000114554, ENSG00000175745	2.07706	1	0.359681	0.348353
Heart	GroupC	GO:0034220~ion transmembrane transport	13	0.0285518	ENSG00000133657, ENSG00000053918, ENSG00000154518, ENSG00000114279, ENSG00000138622, ENSG00000168135, ENSG00000158286, ENSG00000107130, ENSG00000130529, ENSG00000055118, ENSG00000183873, ENSG00000179091, ENSG00000165238	1.98845	1	0.362607	0.351187
Heart	GroupC	GO:1902667~regulation of axon guidance	3	0.0296492	ENSG00000143434, ENSG00000221866, ENSG00000114554	11.0474	1	0.374671	0.362871
Heart	GroupC	GO:1904064~positive regulation of cation transmembrane transport	4	0.0299594	ENSG00000053918, ENSG00000158286, ENSG00000055118, ENSG00000165238	5.89193	1	0.376717	0.364852
Heart	GroupC	GO:0035239~tube morphogenesis	7	0.0302268	ENSG00000166145, ENSG00000198959, ENSG00000183072, ENSG00000157240, ENSG00000119508, ENSG00000164932, ENSG00000136574	2.9629	1	0.378207	0.366295
Heart	GroupC	GO:0055085~transmembrane transport	16	0.0315455	ENSG00000133657, ENSG00000070214, ENSG00000053918, ENSG00000154518, ENSG00000114279, ENSG00000138622, ENSG00000121743, ENSG00000168135, ENSG00000158286, ENSG00000107130, ENSG00000130529, ENSG00000055118, ENSG00000183873, ENSG00000179091, ENSG00000181856, ENSG00000165238	1.78273	1	0.392773	0.380402
Heart	GroupC	GO:0086028~bundle of His cell to Purkinje myocyte signaling	2	0.0332011	ENSG00000130529, ENSG00000183873	58.9193	1	0.400955	0.388326
Heart	GroupC	GO:0086045~membrane depolarization during AV node cell action potential	2	0.0332011	ENSG00000130529, ENSG00000183873	58.9193	1	0.400955	0.388326
Heart	GroupC	GO:0086043~bundle of His cell action potential	2	0.0332011	ENSG00000130529, ENSG00000183873	58.9193	1	0.400955	0.388326
Heart	GroupC	GO:0086029~Purkinje myocyte to ventricular cardiac muscle cell signaling	2	0.0332011	ENSG00000130529, ENSG00000183873	58.9193	1	0.400955	0.388326
Heart	GroupC	GO:0051891~positive regulation of cardioblast differentiation	2	0.0332011	ENSG00000183072, ENSG00000136574	58.9193	1	0.400955	0.388326
Heart	GroupC	GO:0086046~membrane depolarization during SA node cell action potential	2	0.0332011	ENSG00000183873, ENSG00000138622	58.9193	1	0.400955	0.388326
Heart	GroupC	GO:1902578~single-organism localization	34	0.0333968	ENSG00000158769, ENSG00000039068, ENSG00000130294, ENSG00000134278, ENSG00000178878, ENSG00000198959, ENSG00000183072, ENSG00000121743, ENSG00000061676, ENSG00000188026, ENSG00000168135, ENSG00000119508, ENSG00000158286, ENSG00000107130, ENSG00000130529, ENSG00000055118, ENSG00000095637, ENSG00000183873, ENSG00000181856, ENSG00000141510, ENSG00000163820, ENSG00000133657, ENSG00000070214, ENSG0000…	1.38576	1	0.400955	0.388326
Heart	GroupC	GO:0043269~regulation of ion transport	9	0.0334655	ENSG00000183072, ENSG00000053918, ENSG00000168135, ENSG00000158286, ENSG00000055118, ENSG00000183873, ENSG00000114279, ENSG00000165238, ENSG00000138622	2.39293	1	0.400955	0.388326
Heart	GroupC	GO:0045933~positive regulation of muscle contraction	3	0.0338819	ENSG00000053918, ENSG00000158286, ENSG00000130529	10.2766	1	0.402286	0.389616
Heart	GroupC	GO:1902580~single-organism cellular localization	14	0.0338934	ENSG00000158769, ENSG00000039068, ENSG00000154518, ENSG00000130294, ENSG00000134278, ENSG00000188026, ENSG00000088888, ENSG00000157240, ENSG00000119508, ENSG00000165914, ENSG00000095637, ENSG00000179091, ENSG00000141510, ENSG00000163820	1.8713	1	0.402286	0.389616
Heart	GroupC	GO:0071804~cellular potassium ion transport	5	0.0345527	ENSG00000053918, ENSG00000168135, ENSG00000158286, ENSG00000055118, ENSG00000138622	4.04666	1	0.405593	0.392818
Heart	GroupC	GO:0071805~potassium ion transmembrane transport	5	0.0345527	ENSG00000053918, ENSG00000168135, ENSG00000158286, ENSG00000055118, ENSG00000138622	4.04666	1	0.405593	0.392818
Heart	GroupC	GO:1901699~cellular response to nitrogen compound	9	0.0346971	ENSG00000053918, ENSG00000088888, ENSG00000173153, ENSG00000039068, ENSG00000119508, ENSG00000095637, ENSG00000108840, ENSG00000181856, ENSG00000138622	2.37578	1	0.405593	0.392818
Heart	GroupC	GO:0042391~regulation of membrane potential	7	0.0348107	ENSG00000053918, ENSG00000158286, ENSG00000130529, ENSG00000055118, ENSG00000183873, ENSG00000114279, ENSG00000138622	2.86413	1	0.405593	0.392818
Heart	GroupC	GO:0050881~musculoskeletal movement	3	0.0353422	ENSG00000198771, ENSG00000173991, ENSG00000114854	10.0431	1	0.408042	0.39519
Heart	GroupC	GO:0050879~multicellular organismal movement	3	0.0353422	ENSG00000198771, ENSG00000173991, ENSG00000114854	10.0431	1	0.408042	0.39519
Heart	GroupC	GO:0048588~developmental cell growth	5	0.0382121	ENSG00000143434, ENSG00000163110, ENSG00000221866, ENSG00000136574, ENSG00000114554	3.91751	1	0.43918	0.425347
Heart	GroupC	GO:1901698~response to nitrogen compound	12	0.0385442	ENSG00000053918, ENSG00000088888, ENSG00000177000, ENSG00000173153, ENSG00000039068, ENSG00000119508, ENSG00000155846, ENSG00000095637, ENSG00000108840, ENSG00000179091, ENSG00000181856, ENSG00000138622	1.97495	1	0.441001	0.427111
Heart	GroupC	GO:0098910~regulation of atrial cardiac muscle cell action potential	2	0.039709	ENSG00000158286, ENSG00000130529	49.0994	1	0.44827	0.434151
Heart	GroupC	GO:0086068~Purkinje myocyte to ventricular cardiac muscle cell communication	2	0.039709	ENSG00000130529, ENSG00000183873	49.0994	1	0.44827	0.434151
Heart	GroupC	GO:0097623~potassium ion export across plasma membrane	2	0.039709	ENSG00000053918, ENSG00000055118	49.0994	1	0.44827	0.434151
Heart	GroupC	GO:0010243~response to organonitrogen compound	11	0.0399403	ENSG00000053918, ENSG00000177000, ENSG00000173153, ENSG00000039068, ENSG00000119508, ENSG00000155846, ENSG00000095637, ENSG00000108840, ENSG00000179091, ENSG00000181856, ENSG00000138622	2.05359	1	0.448887	0.434749
Heart	GroupC	GO:0035295~tube development	9	0.0420253	ENSG00000076604, ENSG00000166145, ENSG00000173706, ENSG00000198959, ENSG00000183072, ENSG00000157240, ENSG00000119508, ENSG00000164932, ENSG00000136574	2.28566	1	0.47023	0.455419
Heart	GroupC	GO:0071417~cellular response to organonitrogen compound	8	0.0422096	ENSG00000053918, ENSG00000173153, ENSG00000039068, ENSG00000119508, ENSG00000095637, ENSG00000108840, ENSG00000181856, ENSG00000138622	2.47041	1	0.47023	0.455419
Heart	GroupC	GO:0034767~positive regulation of ion transmembrane transport	4	0.0425873	ENSG00000053918, ENSG00000158286, ENSG00000055118, ENSG00000165238	5.12342	1	0.472366	0.457489
Heart	GroupC	GO:0006754~ATP biosynthetic process	3	0.0429971	ENSG00000250479, ENSG00000154518, ENSG00000179091	9.01826	1	0.472782	0.457891
Heart	GroupC	GO:0061383~trabecula morphogenesis	3	0.0429971	ENSG00000173706, ENSG00000183072, ENSG00000155846	9.01826	1	0.472782	0.457891
Heart	GroupC	GO:1901701~cellular response to oxygen-containing compound	12	0.0431885	ENSG00000053918, ENSG00000173153, ENSG00000197256, ENSG00000039068, ENSG00000119508, ENSG00000130529, ENSG00000136574, ENSG00000155846, ENSG00000095637, ENSG00000108840, ENSG00000181856, ENSG00000138622	1.93813	1	0.472839	0.457947
Heart	GroupC	GO:0048545~response to steroid hormone	7	0.0438707	ENSG00000140682, ENSG00000107317, ENSG00000173153, ENSG00000197256, ENSG00000119508, ENSG00000155846, ENSG00000175745	2.70627	1	0.478247	0.463184
Heart	GroupC	GO:2000021~regulation of ion homeostasis	5	0.0454787	ENSG00000130529, ENSG00000183873, ENSG00000114279, ENSG00000165238, ENSG00000138622	3.70096	1	0.492776	0.477255
Heart	GroupC	GO:0086016~AV node cell action potential	2	0.0461735	ENSG00000130529, ENSG00000183873	42.0852	1	0.492776	0.477255
Heart	GroupC	GO:0051890~regulation of cardioblast differentiation	2	0.0461735	ENSG00000183072, ENSG00000136574	42.0852	1	0.492776	0.477255
Heart	GroupC	GO:0060372~regulation of atrial cardiac muscle cell membrane repolarization	2	0.0461735	ENSG00000053918, ENSG00000183873	42.0852	1	0.492776	0.477255
Heart	GroupC	GO:0086027~AV node cell to bundle of His cell signaling	2	0.0461735	ENSG00000130529, ENSG00000183873	42.0852	1	0.492776	0.477255
Heart	GroupC	GO:0030001~metal ion transport	11	0.0476143	ENSG00000183072, ENSG00000053918, ENSG00000168135, ENSG00000158286, ENSG00000107130, ENSG00000130529, ENSG00000055118, ENSG00000183873, ENSG00000114279, ENSG00000165238, ENSG00000138622	1.99052	1	0.506027	0.490089
Heart	GroupC	GO:0051173~positive regulation of nitrogen compound metabolic process	19	0.0481785	ENSG00000178573, ENSG00000039068, ENSG00000146592, ENSG00000173153, ENSG00000170681, ENSG00000136574, ENSG00000155846, ENSG00000112561, ENSG00000175745, ENSG00000140682, ENSG00000183072, ENSG00000144712, ENSG00000203867, ENSG00000088888, ENSG00000157240, ENSG00000119508, ENSG00000108840, ENSG00000078804, ENSG00000141510	1.58385	1	0.508798	0.492773
Heart	GroupC	GO:0034764~positive regulation of transmembrane transport	4	0.0482757	ENSG00000053918, ENSG00000158286, ENSG00000055118, ENSG00000165238	4.86936	1	0.508798	0.492773
Heart	GroupC	GO:1902305~regulation of sodium ion transmembrane transport	3	0.0495225	ENSG00000183873, ENSG00000114279, ENSG00000165238	8.33764	1	0.519782	0.503411
Heart	GroupC	GO:0040011~locomotion	17	0.0503961	ENSG00000158769, ENSG00000198053, ENSG00000088280, ENSG00000108947, ENSG00000112245, ENSG00000112137, ENSG00000196535, ENSG00000114554, ENSG00000174348, ENSG00000143434, ENSG00000113296, ENSG00000119508, ENSG00000063660, ENSG00000164932, ENSG00000130529, ENSG00000221866, ENSG00000108840	1.63665	1	0.526774	0.510183
Heart	GroupC	GO:0072659~protein localization to plasma membrane	5	0.0512166	ENSG00000158769, ENSG00000188026, ENSG00000039068, ENSG00000165914, ENSG00000095637	3.55793	1	0.533157	0.516364
Heart	GroupC	GO:0086015~SA node cell action potential	2	0.0525948	ENSG00000183873, ENSG00000138622	36.8246	1	0.543052	0.525948
Heart	GroupC	GO:0086018~SA node cell to atrial cardiac muscle cell signalling	2	0.0525948	ENSG00000183873, ENSG00000138622	36.8246	1	0.543052	0.525948
Heart	GroupC	GO:0060429~epithelium development	13	0.0529244	ENSG00000158769, ENSG00000173991, ENSG00000178573, ENSG00000136574, ENSG00000114554, ENSG00000178878, ENSG00000166145, ENSG00000198959, ENSG00000173706, ENSG00000183072, ENSG00000188026, ENSG00000157240, ENSG00000164932	1.80649	1	0.544243	0.527102
Heart	GroupC	GO:0065007~biological regulation	87	0.0538135	ENSG00000158769, ENSG00000108947, ENSG00000177000, ENSG00000178573, ENSG00000197256, ENSG00000077157, ENSG00000112245, ENSG00000136574, ENSG00000160808, ENSG00000073670, ENSG00000112561, ENSG00000134278, ENSG00000175745, ENSG00000140682, ENSG00000143434, ENSG00000113296, ENSG00000203867, ENSG00000188026, ENSG00000168135, ENSG00000166592, ENSG00000158286, ENSG00000107130, ENSG00000164932, ENSG0000…	1.10971	1	0.551154	0.533795
Heart	GroupC	GO:0090288~negative regulation of cellular response to growth factor stimulus	4	0.0543176	ENSG00000140682, ENSG00000188730, ENSG00000157240, ENSG00000063660	4.63931	1	0.554083	0.536632
Heart	GroupC	GO:0051049~regulation of transport	19	0.0549085	ENSG00000053918, ENSG00000039068, ENSG00000114854, ENSG00000196535, ENSG00000114279, ENSG00000138622, ENSG00000183072, ENSG00000088888, ENSG00000168135, ENSG00000157240, ENSG00000158286, ENSG00000119508, ENSG00000107130, ENSG00000130529, ENSG00000055118, ENSG00000095637, ENSG00000183873, ENSG00000141510, ENSG00000165238	1.55828	1	0.556531	0.539002
Heart	GroupC	GO:0006813~potassium ion transport	5	0.0549957	ENSG00000053918, ENSG00000168135, ENSG00000158286, ENSG00000055118, ENSG00000138622	3.47402	1	0.556531	0.539002
[truncated: 2,651 more rows]
